# Supplementary material for: Global Assessment of Seasonal Potential Distribution of Mediterranean Fruit Fly, Ceratitis capitata (Diptera: Tephritidae)
Source: PLoS One. 2014 Nov 6;9(11):e111582. doi: 10.1371/journal.pone.0111582 (PMC4222914; doi:10.1371/journal.pone.0111582)
Supplement: Dataset S1 — Medfly occurrence dataset. (XLSX) [file pone.0111582.s002.xlsx]

## Sheet: MEDFLYDATA
SOURCE_ID	INITIALS	1STAUTHOR	YEAR	SOURCE_TYPE	PUBLISHED	MEDFLY_DATA	COUNTRY	ADMINLEVEL1	ADMINLEVEL2	LOCALITY	LOC_NOTES	LATLONGSOURCE	LATDEG	LATMIN	LATSEC	LONGDEG	LONGMIN	LONGSEC	LAT	LONG	COORDFROMSOURCE	GOODGUESS	BADGUESS	SITENOTES	PRESENCE	YEAR	MONTH	DAY	RELATIVE_INTENSITY	PRESENT	TEMPREF	SAMPLINGTECHNIQUE1	NO2	SAMPLINGTECHNIQUE2	NO2	DEV_STAGE	HOST1	HOST2	HOST3	HOST4	HOST5	HOST6	HOST7	HOST8	HOST9	HOST10
4	A C	Aguirre	1977	Book	Yes	No	Bolivia			Bolivia	Foote 1967, CIE `967, 84	GoogleEarth	-16	17	24	-63	35	19	-16.29	-63.5886	No	No	Yes	Country center						Yes	No
4	A C	Aguirre	1977	Book	Yes	No	Brazil	Ceara		Fortaleza	Morgante 1991	GoogleEarth	-3	43	6	-38	32	36	-3.71833	-38.5433	No	No	Yes	Lit review presence localities listed w/o coordinates						Yes	No
4	A C	Aguirre	1977	Book	Yes	No	Brazil	Pernambuco		Petrolina	Morgante 1991	GoogleEarth	-9	23	41	-40	30	8	-9.39472	-40.5022	No	No	Yes	Lit review presence localities listed w/o coordinates						Yes	No
4	A C	Aguirre	1977	Book	Yes	No	Brazil	Bahia		Juazeiro	Morgante 1991	GoogleEarth	-9	26	18	-40	30	18	-9.43833	-40.505	No	No	Yes	Lit review presence localities listed w/o coordinates						Yes	No
4	A C	Aguirre	1977	Book	Yes	No	Brazil	Distrito Federal		Nova Betania	Zahler 1991								#DIV/0!	#DIV/0!	No	No	Yes	Lit review presence localities listed w/o coordinates						Yes	No
4	A C	Aguirre	1977	Book	Yes	No	Brazil	Distrito Federal		Fazenda	Zahler 1991								#DIV/0!	#DIV/0!	No	No	Yes	Lit review presence localities listed w/o coordinates						Yes	No
4	A C	Aguirre	1977	Book	Yes	No	Brazil	Rio de Janeiro		Itaguai	Aguiar et al. 1996	GoogleEarth	-22	51	59	-43	46	38	-22.8664	-43.7772	No	No	Yes	Lit review presence localities listed w/o coordinates						Yes	No
4	A C	Aguirre	1977	Book	Yes	No	Brazil	Sao Paulo		Pirassununga	Fernandes et al. 1993	GoogleEarth	-21	59	46	-47	25	35	-21.9961	-47.4264	No	No	Yes	Lit review presence localities listed w/o coordinates						Yes	No
4	A C	Aguirre	1977	Book	Yes	No	Brazil	Sao Paulo		Limeira	Figo et al 1987	GoogleEarth	-22	33	52	-47	24	1	-22.5644	-47.4003	No	No	Yes	Lit review presence localities listed w/o coordinates						Yes	No
4	A C	Aguirre	1977	Book	Yes	No	Brazil	Sao Paulo		Cordeiropolis	Figo et al 1987	GoogleEarth	-22	28	48	-47	27	20	-22.48	-47.4556	No	No	Yes	Lit review presence localities listed w/o coordinates						Yes	No
4	A C	Aguirre	1977	Book	Yes	No	Brazil	Sao Paulo		Riberao Preto	Bressan et al. 1991	GoogleEarth	-21	10	35	-47	49	14	-21.1764	-47.8206	No	No	Yes	Lit review presence localities listed w/o coordinates						Yes	No
4	A C	Aguirre	1977	Book	Yes	No	Brazil	Sao Paulo		Sertaozinho	Bressan et al. 1991	GoogleEarth	-21	8	36	-48	0	25	-21.1433	-48.0069	No	No	Yes	Lit review presence localities listed w/o coordinates						Yes	No
4	A C	Aguirre	1977	Book	Yes	No	Brazil	Rio Grande do Sul		Rio Grande do Sul	Morgante 1991	GoogleEarth	-29	32	4	-53	23	26	-29.5344	-53.3906	No	No	Yes	Province center						Yes	No
4	A C	Aguirre	1977	Book	Yes	No	Brazil	Santa Catarina		Santa Catarina	Morgante 1991	GoogleEarth	-26	55	42	-49	21	55	-26.9283	-49.3653	No	No	Yes	Province center						Yes	No
4	A C	Aguirre	1977	Book	Yes	No	Brazil	Parana		Parana	Santos 1988, Morgante 1991	GoogleEarth	-25	15	7	-52	1	17	-25.2519	-52.0214	No	No	Yes	Province center						Yes	No
4	A C	Aguirre	1977	Book	Yes	No	Brazil	Minas Gerais		Minas Gerais	Rossi et al. 1988, Morgante 1991	GoogleEarth	-17	55	48	-43	47	27	-17.93	-43.7908	No	No	Yes	Province center						Yes	No
4	A C	Aguirre	1977	Book	Yes	No	Brazil	Espiritu Santo		Espiritu Santo	Martins et al. 1993, Morgante 1991	GoogleEarth	-19	41	22	-40	45	3	-19.6894	-40.7508	No	No	Yes	Province center						Yes	No
4	A C	Aguirre	1977	Book	Yes	No	Brazil	Sergipe		Sergipe	Morgante 1991	GoogleEarth	-10	40	26	-28	5	30	-10.6739	-28.0917	No	No	Yes	Province center						Yes	No
4	A C	Aguirre	1977	Book	Yes	No	Brazil	Alagoas		Alagoas	Morgante 1991	GoogleEarth	-9	34	16	-36	46	55	-9.57111	-36.7819	No	No	Yes	Province center						Yes	No
4	A C	Aguirre	1977	Book	Yes	No	Brazil	Paraiba		Paraiba	Morgante 1991	GoogleEarth	-7	14	23	-36	46	55	-7.23972	-36.7819	No	No	Yes	Province center						Yes	No
4	A C	Aguirre	1977	Book	Yes	No	Brazil	Ceara		Ceara	Morgante 1991	GoogleEarth	-5	29	54	-39	19	14	-5.49833	-39.3206	No	No	Yes	Province center						Yes	No
4	A C	Aguirre	1977	Book	Yes	No	Brazil	Piaui		Piaui	Morgante 1991	GoogleEarth	-8	19	22	-43	10	28	-8.32278	-43.1744	No	No	Yes	Province center						Yes	No
4	A C	Aguirre	1977	Book	Yes	No	Brazil	Maranhao		Maranhao	Morgante 1991	GoogleEarth	-5	4	49	-45	36	2	-5.08028	-45.6006	No	No	Yes	Province center						Yes	No
4	A C	Aguirre	1977	Book	Yes	No	Brazil	Mato Grosso du Sul		Mato Grosso du Sul	Morgante 1991	GoogleEarth	-20	46	20	-54	47	6	-20.7722	-54.785	No	No	Yes	Province center						Yes	No
4	A C	Aguirre	1977	Book	Yes	No	Brazil	Goias		Goias	Morgante 1991	GoogleEarth	-15	55	20	50	8	16	-15.9222	50.1378	No	No	Yes	Province center						Yes	No
4	A C	Aguirre	1977	Book	Yes	No	Brazil	Mato Grosso		Mato Grosso	Morgante 1991	GoogleEarth	-12	40	54	-56	55	15	-12.6817	-56.9208	No	No	Yes	Province center						Yes	No
4	A C	Aguirre	1977	Book	Yes	No	Colombia			Colombia	Foote 1980								#DIV/0!	#DIV/0!	No	No	Yes	Lit review presence localities listed w/o coordinates						Yes	No
4	A C	Aguirre	1977	Book	Yes	No	Chile	Arica		Cuidad de Arica	Olalquiaga et al. 1993, Lobos 1996, Herrera 1977, IICA 1996b	GoogleEarth	-18	28	37	-70	18	52	-18.4769	-70.3144	No	No	Yes	Lit review presence localities listed w/o coordinates						Yes	No
4	A C	Aguirre	1977	Book	Yes	No	Chile	Arica		Azapa		GoogleEarth	-18	31	36	-70	9	58	-18.5267	-70.1661	No	No	Yes	Lit review presence localities listed w/o coordinates						Yes	No
4	A C	Aguirre	1977	Book	Yes	No	Chile	Arica		Codpa		GoogleEarth	-18	49	58	-69	44	38	-18.8328	-69.7439	No	No	Yes	Lit review presence localities listed w/o coordinates						Yes	No
4	A C	Aguirre	1977	Book	Yes	No	Chile	Arica		Chaca		GoogleEarth	-18	49	41	70	8	10	-18.8281	70.1361	No	No	Yes	Lit review presence localities listed w/o coordinates						Yes	No
4	A C	Aguirre	1977	Book	Yes	No	Chile	Arica		Chacalluta		GoogleEarth	-18	23	46	-70	18	1	-18.3961	-70.3003	No	No	Yes	Lit review presence localities listed w/o coordinates						Yes	No
4	A C	Aguirre	1977	Book	Yes	No	Chile	Arica		Central		GoogleEarth	-18	23	16	-69	57	14	-18.3878	-69.9539	No	No	Yes	Lit review presence localities listed w/o coordinates						Yes	No
4	A C	Aguirre	1977	Book	Yes	No	Chile	Arica		Gallinazos		GoogleEarth	-18	24	2	-70	18	51	-18.4006	-70.3142	No	No	Yes	Lit review presence localities listed w/o coordinates						Yes	No
4	A C	Aguirre	1977	Book	Yes	No	Chile	Arica		Bellet									#DIV/0!	#DIV/0!	No	No	Yes	Lit review presence localities listed w/o coordinates						Yes	No
4	A C	Aguirre	1977	Book	Yes	No	Chile	Arica		Hipodromo									#DIV/0!	#DIV/0!	No	No	Yes	Lit review presence localities listed w/o coordinates						Yes	No
4	A C	Aguirre	1977	Book	Yes	No	Chile	Arica		Parque Puerta Norte									#DIV/0!	#DIV/0!	No	No	Yes	Lit review presence localities listed w/o coordinates						Yes	No
4	A C	Aguirre	1977	Book	Yes	No	Chile	Arica		Cuya		GoogleEarth	-19	9	29	-70	10	37	-19.1581	-70.1769	No	No	Yes	Lit review presence localities listed w/o coordinates						Yes	No
4	A C	Aguirre	1977	Book	Yes	No	Chile	Inquique		Cuidad de Inquique	Harris et al. 1993	GoogleEarth	-20	13	0	-70	8	32	-20.2167	-70.1422	No	No	Yes	Lit review presence localities listed w/o coordinates						Yes	No
4	A C	Aguirre	1977	Book	Yes	No	Chile	Inquique		Pica		GoogleEarth	-20	13	55	-70	7	44	-20.2319	-70.1289	No	No	Yes	Lit review presence localities listed w/o coordinates						Yes	No
4	A C	Aguirre	1977	Book	Yes	No	Chile	Inquique		Chiza		GoogleEarth	-20	15	59	-70	7	43	-20.2664	-70.1286	No	No	Yes	Lit review presence localities listed w/o coordinates						Yes	No
4	A C	Aguirre	1977	Book	Yes	No	Chile	Inquique		Metilla		GoogleEarth	-20	15	5	-70	7	25	-20.2514	-70.1236	No	No	Yes	Lit review presence localities listed w/o coordinates						Yes	No
4	A C	Aguirre	1977	Book	Yes	No	Chile	Inquique		Esperalda									#DIV/0!	#DIV/0!	No	No	Yes	Lit review presence localities listed w/o coordinates						Yes	No
4	A C	Aguirre	1977	Book	Yes	No	Chile	Inquique		Suca									#DIV/0!	#DIV/0!	No	No	Yes	Lit review presence localities listed w/o coordinates						Yes	No
4	A C	Aguirre	1977	Book	Yes	No	Chile	Inquique		Canchones									#DIV/0!	#DIV/0!	No	No	Yes	Lit review presence localities listed w/o coordinates						Yes	No
4	A C	Aguirre	1977	Book	Yes	No	Chile	Antofagasta		Ciudad de Antofagasta		GoogleEarth	-20	13	26	-70	8	35	-20.2239	-70.1431	No	No	Yes	Lit review presence localities listed w/o coordinates						Yes	No
4	A C	Aguirre	1977	Book	Yes	No	Chile	Antofagasta		Tocopilla		GoogleEarth	-22	5	8	-70	11	34	-22.0856	-70.1928	No	No	Yes	Lit review presence localities listed w/o coordinates						Yes	No
4	A C	Aguirre	1977	Book	Yes	No	Chile	Antofagasta		Taltal		GoogleEarth	-25	24	23	-70	28	49	-25.4064	-70.4803	No	No	Yes	Lit review presence localities listed w/o coordinates						Yes	No
4	A C	Aguirre	1977	Book	Yes	No	Chile	El Loa		Calama		GoogleEarth	-22	27	13	-68	55	31	-22.4536	-68.9253	No	No	Yes	Lit review presence localities listed w/o coordinates						Yes	No
4	A C	Aguirre	1977	Book	Yes	No	Chile	Chanaral		Diego de Alamagro		GoogleEarth	-26	23	24	-70	2	51	-26.39	-70.0475	No	No	Yes	Lit review presence localities listed w/o coordinates						Yes	No
4	A C	Aguirre	1977	Book	Yes	No	Chile	Chanaral		Llanta		GoogleEarth	-27	6	22	-70	47	39	-27.1061	-70.7942	No	No	Yes	Lit review presence localities listed w/o coordinates						Yes	No
4	A C	Aguirre	1977	Book	Yes	No	Chile	Chanaral		El Salvador		GoogleEarth	-26	14	44	-69	37	34	-26.2456	-69.6261	No	No	Yes	Lit review presence localities listed w/o coordinates						Yes	No
4	A C	Aguirre	1977	Book	Yes	No	Chile	Huasco		Vallenar		GoogleEarth	-28	34	32	-70	45	25	-28.5756	-70.7569	No	No	Yes	Lit review presence localities listed w/o coordinates						Yes	No
4	A C	Aguirre	1977	Book	Yes	No	Chile	Elqui		La Serena		GoogleEarth	-29	54	22	-71	15	0	-29.9061	-71.25	No	No	Yes	Lit review presence localities listed w/o coordinates						Yes	No
4	A C	Aguirre	1977	Book	Yes	No	Chile	Elqui		Coquimbo		GoogleEarth	-29	55	59	-71	19	0	-29.9331	-71.3167	No	No	Yes	Lit review presence localities listed w/o coordinates						Yes	No
4	A C	Aguirre	1977	Book	Yes	No	Chile	Los Andes		Los Andes		GoogleEarth	-32	50	1	-70	35	49	-32.8336	-70.5969	No	No	Yes	Lit review presence localities listed w/o coordinates						Yes	No
4	A C	Aguirre	1977	Book	Yes	No	Chile	Valparaiso		Vina del Mar		GoogleEarth	-33	1	28	-71	33	8	-33.0244	-71.5522	No	No	Yes	Lit review presence localities listed w/o coordinates						Yes	No
4	A C	Aguirre	1977	Book	Yes	No	Chile	Santiago		Ciudad de Santiago		GoogleEarth	-33	25	0	-70	33	0	-33.4167	-70.55	No	No	Yes	Lit review presence localities listed w/o coordinates						Yes	No
4	A C	Aguirre	1977	Book	Yes	No	Ecuador	Carchi		Mira	Foote 1980	GoogleEarth	0	33	0	-78	2	27	0.55	-78.0408	No	No	Yes	Lit review presence localities listed w/o coordinates						Yes	No
4	A C	Aguirre	1977	Book	Yes	No	Ecuador	Carchi		Chota	Molineros et al. 1992	GoogleEarth	0	27	47	-77	58	41	0.463056	-77.9781	No	No	Yes	Lit review presence localities listed w/o coordinates						Yes	No
4	A C	Aguirre	1977	Book	Yes	No	Ecuador	Imbabura		Ibarra	Molineros et al. 1992	GoogleEarth	0	21	45	-78	7	50	0.3625	-78.1306	No	No	Yes	Lit review presence localities listed w/o coordinates						Yes	No
4	A C	Aguirre	1977	Book	Yes	No	Ecuador	Pichincha		Perucho	Molineros et al. 1992	GoogleEarth	0	7	27	-78	24	20	0.124167	-78.4056	No	No	Yes	Lit review presence localities listed w/o coordinates						Yes	No
4	A C	Aguirre	1977	Book	Yes	No	Ecuador	Pichincha		Puellaro	Molineros et al. 1992	GoogleEarth	0	4	0	-78	24	0	0.0666667	-78.4	No	No	Yes	Lit review presence localities listed w/o coordinates						Yes	No
4	A C	Aguirre	1977	Book	Yes	No	Ecuador	Pichincha		Guayllabamba	Molineros et al. 1992	GoogleEarth	0	3	32	-78	20	29	-0.0588889	-78.3414	No	No	Yes	Lit review presence localities listed w/o coordinates						Yes	No
4	A C	Aguirre	1977	Book	Yes	No	Ecuador	El Oro		Machala	Molineros et al. 1992	GoogleEarth	-3	15	59	-79	57	13	-3.26639	-79.9536	No	No	Yes	Lit review presence localities listed w/o coordinates						Yes	No
4	A C	Aguirre	1977	Book	Yes	No	Ecuador	El Oro		Arenillas	Molineros et al. 1992	GoogleEarth	-3	33	0	-80	5	0	-3.55	-80.0833	No	No	Yes	Lit review presence localities listed w/o coordinates						Yes	No
4	A C	Aguirre	1977	Book	Yes	No	Ecuador	El Oro		Zaruma	Molineros et al. 1992	GoogleEarth	-3	41	14	-79	36	39	-3.68722	-79.6108	No	No	Yes	Lit review presence localities listed w/o coordinates						Yes	No
4	A C	Aguirre	1977	Book	Yes	No	Ecuador	El Oro		Portovelo	Molineros et al. 1992	GoogleEarth	-3	43	12	-79	37	12	-3.72	-79.62	No	No	Yes	Lit review presence localities listed w/o coordinates						Yes	No
4	A C	Aguirre	1977	Book	Yes	No	Ecuador	Loja		Loja	Molineros et al. 1992	GoogleEarth	-3	59	24	-79	12	16	-3.99	-79.2044	No	No	Yes	Lit review presence localities listed w/o coordinates						Yes	No
4	A C	Aguirre	1977	Book	Yes	No	Ecuador	Loja		Catamayo	Molineros et al. 1992	GoogleEarth	-3	59	0	-79	21	0	-3.98333	-79.35	No	No	Yes	Lit review presence localities listed w/o coordinates						Yes	No
4	A C	Aguirre	1977	Book	Yes	No	Ecuador	Loja		El Tambo	Molineros et al. 1992	GoogleEarth	-4	4	19	-79	18	22	-4.07194	-79.3061	No	No	Yes	Lit review presence localities listed w/o coordinates						Yes	No
4	A C	Aguirre	1977	Book	Yes	No	Ecuador	Loja		Malacatos	Molineros et al. 1992	GoogleEarth	-4	12	43	-79	13	51	-4.21194	-79.2308	No	No	Yes	Lit review presence localities listed w/o coordinates						Yes	No
4	A C	Aguirre	1977	Book	Yes	No	Ecuador	Loja		Vilcabamba	Molineros et al. 1992	GoogleEarth	-4	15	44	-79	13	19	-4.26222	-79.2219	No	No	Yes	Lit review presence localities listed w/o coordinates						Yes	No
4	A C	Aguirre	1977	Book	Yes	No	Ecuador	Azuay		Paute	Molineros et al. 1992	GoogleEarth	-2	46	48	-78	45	40	-2.78	-78.7611	No	No	Yes	Lit review presence localities listed w/o coordinates						Yes	No
4	A C	Aguirre	1977	Book	Yes	No	Ecuador	Azuay		Gualaceo	Molineros et al. 1992	GoogleEarth	-2	54	0	-78	47	0	-2.9	-78.7833	No	No	Yes	Lit review presence localities listed w/o coordinates						Yes	No
4	A C	Aguirre	1977	Book	Yes	No	Ecuador	Azuay		Santa Isabel	Molineros et al. 1992	GoogleEarth	-3	16	41	-79	18	57	-3.27806	-79.3158	No	No	Yes	Lit review presence localities listed w/o coordinates						Yes	No
4	A C	Aguirre	1977	Book	Yes	No	Ecuador	Bolivar		Las Naves	Molineros et al. 1992	GoogleEarth	-1	17	6	-79	19	35	-1.285	-79.3264	No	No	Yes	Lit review presence localities listed w/o coordinates						Yes	No
4	A C	Aguirre	1977	Book	Yes	No	Ecuador	Tungurahua		Banos	Molineros et al. 1992	GoogleEarth	-1	23	47	-78	25	29	-1.39639	-78.4247	No	No	Yes	Lit review presence localities listed w/o coordinates						Yes	No
4	A C	Aguirre	1977	Book	Yes	No	Ecuador	Tungurahua		Patate	Molineros et al. 1992								#DIV/0!	#DIV/0!	No	No	Yes	Lit review presence localities listed w/o coordinates						Yes	No
4	A C	Aguirre	1977	Book	Yes	No	Paraguay	Paraguay		Paraguay	CIE 1867 1984								#DIV/0!	#DIV/0!	No	No	Yes	Lit review presence localities listed w/o coordinates						Yes	No
4	A C	Aguirre	1977	Book	Yes	No	Peru	Huanuco		Valle de Huanuco	Cuculiza et al. 1975	GoogleEarth	-9	55	46	-76	14	22	-9.92944	-76.2394	No	No	Yes	Lit review presence localities listed w/o coordinates						Yes	No
4	A C	Aguirre	1977	Book	Yes	No	Peru	Piura		Chulucanas	Herrera et al. 1977	GoogleEarth	-5	5	59	-80	9	43	-5.09972	-80.1619	No	No	Yes	Lit review presence localities listed w/o coordinates						Yes	No
4	A C	Aguirre	1977	Book	Yes	No	Peru	Ica		Valle de Palpa	Ramos et al. 1974	GoogleEarth	-14	32	2	-75	11	7	-14.5339	-75.1853	No	No	Yes	Lit review presence localities listed w/o coordinates						Yes	No
4	A C	Aguirre	1977	Book	Yes	No	Peru	Moquegua		Estiguina	Simon et al. 1972	GoogleEarth							#DIV/0!	#DIV/0!	No	No	Yes	Lit review presence localities listed w/o coordinates						Yes	No
4	A C	Aguirre	1977	Book	Yes	No	Peru	Moquegua		Smegua	Harris et al. 1991	GoogleEarth	-17	10	58	-70	53	48	-17.1828	-70.8967	No	No	Yes	Lit review presence localities listed w/o coordinates						Yes	No
4	A C	Aguirre	1977	Book	Yes	No	Peru	Moquegua		Rinconada	Foote 1980	GoogleEarth	-17	25	18	-70	57	29	-17.4217	-70.9581	No	No	Yes	Lit review presence localities listed w/o coordinates						Yes	No
4	A C	Aguirre	1977	Book	Yes	No	Peru	Tacna		Santa Rosa	Foote 1967, CIE `967, 84	GoogleEarth	-18	0	41	-70	14	15	-18.0114	-70.2375	No	No	Yes	Lit review presence localities listed w/o coordinates						Yes	No
4	A C	Aguirre	1977	Book	Yes	No	Surinam			Surinam	Vadora et al. 1993	GoogleEarth							#DIV/0!	#DIV/0!	No	No	Yes	Lit review presence localities listed w/o coordinates						Yes	No
4	A C	Aguirre	1977	Book	Yes	No	Uruguay	Salto		Uruguay	CIE 1967, 1984, Rohwer 1992	GoogleEarth	-31	24	16	-57	33	6	-31.4044	-57.5517	No	No	Yes	Lit review presence localities listed w/o coordinates						Yes	No
4	A C	Aguirre	1977	Book	Yes	No	Venezuela	Aragua		Maracay	Boscan et al. 1995	GoogleEarth	10	14	40	-67	35	37	10.2444	-67.5936	No	No	Yes	Lit review presence localities listed w/o coordinates						Yes	No
4	A C	Aguirre	1977	Book	Yes	No	Venezuela	Miranda		Venezuela	CIE 1984	GoogleEarth	10	15	3	-66	25	37	10.2508	-66.4269	No	No	Yes	Lit review presence localities listed w/o coordinates						Yes	No
133	D F	Segura	2006	Journal	Yes	Yes	Argentina	Buenos Aires	Mercedes	Mercedes		GoogleEarth	-34	39	13	-59	25	40	-34.6536	-59.4278	No	Yes	No							Yes	No
133	D F	Segura	2006	Journal	Yes	Yes	Argentina	Buenos Aires	Pilar	Pilar		GoogleEarth	-34	27	21	-58	54	40	-34.4558	-58.9111	No	Yes	No							Yes	No
133	D F	Segura	2006	Journal	Yes	Yes	Argentina	Buenos Aires	Gob. Castro Doyle	Gob. Castro Doyle		GoogleEarth	-34	37	41	-58	25	13	-34.6281	-58.4203	No	Yes	No							Yes	No
133	D F	Segura	2006	Journal	Yes	Yes	Argentina	Buenos Aires	Doyle	Doyle		GoogleEarth	-33	54	8	-59	49	17	-33.9022	-59.8214	No	Yes	No							Yes	No
133	D F	Segura	2006	Journal	Yes	Yes	Argentina	Buenos Aires	San Pedro	San Pedro		GoogleEarth	-33	40	58	-59	40	21	-33.6828	-59.6725	No	Yes	No							Yes	No
133	D F	Segura	2006	Journal	Yes	Yes	Argentina	Buenos Aires	Villa Adelina	Villa Adelina		GoogleEarth	-34	30	50	-58	32	40	-34.5139	-58.5444	No	Yes	No							Yes	No
133	D F	Segura	2006	Journal	Yes	Yes	Argentina	Buenos Aires	Ituzaingo	Ituzaingo		GoogleEarth	-34	39	26	58	40	30	-34.6572	58.675	No	Yes	No							Yes	No
133	D F	Segura	2006	Journal	Yes	Yes	Argentina	Catamarca	S. F. V. Catamarca	S. F. V. Catamarca		GoogleEarth	-28	28	35	-65	46	24	-28.4764	-65.7733	No	Yes	No							Yes	No
133	D F	Segura	2006	Journal	Yes	Yes	Argentina	Catamarca	Capayan	Capayan		GoogleEarth	-28	44	35	-65	56	31	-28.7431	-65.9419	No	Yes	No							Yes	No
133	D F	Segura	2006	Journal	Yes	Yes	Argentina	Catamarca	Chumbicha	Chumbicha		GoogleEarth	-28	51	20	-66	14	28	-28.8556	-66.2411	No	Yes	No							Yes	No
133	D F	Segura	2006	Journal	Yes	Yes	Argentina	Catamarca	San Jose	San Jose		GoogleEarth	-28	23	15	-65	42	29	-28.3875	-65.7081	No	Yes	No							Yes	No
133	D F	Segura	2006	Journal	Yes	Yes	Argentina	Catamarca	Sta. Rosa	Sta. Rosa		GoogleEarth	-28	2	14	-67	35	39	-28.0372	-67.5942	No	Yes	No							Yes	No
133	D F	Segura	2006	Journal	Yes	Yes	Argentina	Catamarca	Sumalao	Sumalao		GoogleEarth	-28	26	45	-65	46	37	-28.4458	-65.7769	No	Yes	No							Yes	No
133	D F	Segura	2006	Journal	Yes	Yes	Argentina	Catamarca	San Isidro	San Isidro		GoogleEarth	-28	28	14	-65	41	47	-28.4706	-65.6964	No	Yes	No							Yes	No
133	D F	Segura	2006	Journal	Yes	Yes	Argentina	Catamarca	Villa Dolores	Villa Dolores		GoogleEarth	-28	28	23	-65	48	51	-28.4731	-65.8142	No	Yes	No							Yes	No
133	D F	Segura	2006	Journal	Yes	Yes	Argentina	Corrientes	9 de Julio	9 de Julio		GoogleEarth	-28	50	27	-58	49	33	-28.8408	-58.8258	No	Yes	No							Yes	No
133	D F	Segura	2006	Journal	Yes	Yes	Argentina	Corrientes	Bella Vista	Bella Vista		GoogleEarth	-28	30	59	59	1	10	-28.5164	59.0194	No	Yes	No							Yes	No
133	D F	Segura	2006	Journal	Yes	Yes	Argentina	Corrientes	Ituzaingo	Ituzaingo		GoogleEarth	-27	34	2	-56	43	11	-27.5672	-56.7197	No	Yes	No							Yes	No
133	D F	Segura	2006	Journal	Yes	Yes	Argentina	Corrientes	Monte Caseros	Monte Caseros		GoogleEarth	-30	14	56	-57	37	37	-30.2489	-57.6269	No	Yes	No							Yes	No
133	D F	Segura	2006	Journal	Yes	Yes	Argentina	Corrientes	Sombrerito	Sombrerito		GoogleEarth	-27	40	22	-58	44	15	-27.6728	-58.7375	No	Yes	No							Yes	No
133	D F	Segura	2006	Journal	Yes	Yes	Argentina	Corrientes	Virasoro	Virasoro		GoogleEarth	-27	28	14	-58	50	30	-27.4706	-58.8417	No	Yes	No							Yes	No
133	D F	Segura	2006	Journal	Yes	Yes	Argentina	Chaco	Saenz Pena	Saenz Pena		GoogleEarth	-26	47	26	-60	26	24	-26.7906	-60.44	No	Yes	No							Yes	No
133	D F	Segura	2006	Journal	Yes	Yes	Argentina	Entre Rios	Palmar	Palmar		GoogleEarth	-31	59	15	-58	17	59	-31.9875	-58.2997	No	Yes	No							Yes	No
133	D F	Segura	2006	Journal	Yes	Yes	Argentina	Entre Rios	Concordia	Concordia		GoogleEarth	-31	23	38	-58	1	6	-31.3939	-58.0183	No	Yes	No							Yes	No
133	D F	Segura	2006	Journal	Yes	Yes	Argentina	Entre Rios	Chajari	Chajari		GoogleEarth	-30	45	36	-57	58	0	-30.76	-57.9667	No	Yes	No							Yes	No
133	D F	Segura	2006	Journal	Yes	Yes	Argentina	Entre Rios	La Criolla	La Criolla		GoogleEarth	-31	16	31	-58	6	34	-31.2753	-58.1094	No	Yes	No							Yes	No
133	D F	Segura	2006	Journal	Yes	Yes	Argentina	Entre Rios	Puerto Yerua	Puerto Yerua		GoogleEarth	-31	32	39	-58	2	59	-31.5442	-58.0497	No	Yes	No							Yes	No
133	D F	Segura	2006	Journal	Yes	Yes	Argentina	Entre Rios	Villa Zorraquin	Villa Zorraquin		GoogleEarth	-31	18	59	-58	2	9	-31.3164	-58.0358	No	Yes	No							Yes	No
133	D F	Segura	2006	Journal	Yes	Yes	Argentina	Entre Rios	Humaita	Humaita		GoogleEarth	-31	24	0	-58	30	0	-31.4	-58.5	No	Yes	No							Yes	No
133	D F	Segura	2006	Journal	Yes	Yes	Argentina	Entre Rios	Villa Adela	Villa Adela		GoogleEarth	-31	10	0	-58	20		-31.1667	-58.3333	No	Yes	No							Yes	No
133	D F	Segura	2006	Journal	Yes	Yes	Argentina	Jujuy	Yuto	Yuto		GoogleEarth	-23	38	4	-64	27	56	-23.6344	-64.4656	No	Yes	No							Yes	No
133	D F	Segura	2006	Journal	Yes	Yes	Argentina	Jujuy	Ledesma	Ledesma		GoogleEarth	-23	50	0	-64	46	51	-23.8333	-64.7808	No	Yes	No							Yes	No
133	D F	Segura	2006	Journal	Yes	Yes	Argentina	Jujuy	Perico	Perico		GoogleEarth	-24	22	37	-65	7	42	-24.3769	-65.1283	No	Yes	No							Yes	No
133	D F	Segura	2006	Journal	Yes	Yes	Argentina	La Rioja	Chilecito	Chilecito		GoogleEarth	-29	10	0	-67	30	0	-29.1667	-67.5	No	Yes	No							Yes	No
133	D F	Segura	2006	Journal	Yes	Yes	Argentina	La Rioja	Los Sarmientos	Los Sarmientos		GoogleEarth	-29	8	51	-67	28	58	-29.1475	-67.4828	No	Yes	No							Yes	No
133	D F	Segura	2006	Journal	Yes	Yes	Argentina	La Rioja	Guandacol	Guandacol		GoogleEarth	-28	59	57	-67	59	13	-28.9992	-67.9869	No	Yes	No							Yes	No
133	D F	Segura	2006	Journal	Yes	Yes	Argentina	Misiones	Caraguatay	Caraguatay		GoogleEarth	-26	37	11	-54	46	7	-26.6197	-54.7686	No	Yes	No							Yes	No
133	D F	Segura	2006	Journal	Yes	Yes	Argentina	Misiones	Montecarlo	Montecarlo		GoogleEarth	-26	33	50	-54	46	1	-26.5639	-54.7669	No	Yes	No							Yes	No
133	D F	Segura	2006	Journal	Yes	Yes	Argentina	Misiones	El Dorado	El Dorado		GoogleEarth	-26	38	0	-54	66	0	-26.6333	-55.1	No	Yes	No							Yes	No
133	D F	Segura	2006	Journal	Yes	Yes	Argentina	Misiones	Posadas	Posadas		GoogleEarth	-27	23	18	-55	55	26	-27.3883	-55.9239	No	Yes	No							Yes	No
133	D F	Segura	2006	Journal	Yes	Yes	Argentina	Misiones	Taruma	Taruma		GoogleEarth	-27	29	4	-55	6	39	-27.4844	-55.1108	No	Yes	No							Yes	No
133	D F	Segura	2006	Journal	Yes	Yes	Argentina	Salta	Campo Santo	Campo Santo		GoogleEarth	-24	40	42	-65	6	10	-24.6783	-65.1028	No	Yes	No							Yes	No
133	D F	Segura	2006	Journal	Yes	Yes	Argentina	Salta	Cnia Santa Rosa	Cnia Santa Rosa		GoogleEarth	-23	22	0	-64	30	0	-23.3667	-64.5	No	Yes	No							Yes	No
133	D F	Segura	2006	Journal	Yes	Yes	Argentina	Salta	Embarcacion	Embarcacion		GoogleEarth	-23	12	48	-64	5	51	-23.2133	-64.0975	No	Yes	No							Yes	No
133	D F	Segura	2006	Journal	Yes	Yes	Argentina	Salta	Metan	Metan		GoogleEarth	-25	29	56	-64	58	5	-25.4989	-64.9681	No	Yes	No							Yes	No
133	D F	Segura	2006	Journal	Yes	Yes	Argentina	Salta	Oran	Oran		GoogleEarth	-23	8	7	-64	18	38	-23.1353	-64.3106	No	Yes	No							Yes	No
133	D F	Segura	2006	Journal	Yes	Yes	Argentina	Salta	Pichanal	Pichanal		GoogleEarth	-23	18	55	-64	13	9	-23.3153	-64.2192	No	Yes	No							Yes	No
133	D F	Segura	2006	Journal	Yes	Yes	Argentina	San Luis	Lijan	Lijan		GoogleEarth	-33	18	40	-66	20	42	-33.3111	-66.345	No	Yes	No							Yes	No
133	D F	Segura	2006	Journal	Yes	Yes	Argentina	San Luis	Merlo	Merlo		GoogleEarth	-32	20	45	-65	1	46	-32.3458	-65.0294	No	Yes	No							Yes	No
133	D F	Segura	2006	Journal	Yes	Yes	Argentina	San Luis	Quines	Quines		GoogleEarth	-32	13	41	-65	48	49	-32.2281	-65.8136	No	Yes	No							Yes	No
133	D F	Segura	2006	Journal	Yes	Yes	Argentina	Santa Fe	Arocena	Arocena		GoogleEarth	-32	4	37	-60	58	24	-32.0769	-60.9733	No	Yes	No							Yes	No
133	D F	Segura	2006	Journal	Yes	Yes	Argentina	Santa Fe	Reconquista	Reconquista		GoogleEarth	-29	8	37	-59	38	28	-29.1436	-59.6411	No	Yes	No							Yes	No
133	D F	Segura	2006	Journal	Yes	Yes	Argentina	Santa Fe	Monje	Monje		GoogleEarth	-32	21	30	-60	56	32	-32.3583	-60.9422	No	Yes	No							Yes	No
133	D F	Segura	2006	Journal	Yes	Yes	Argentina	Tucuman	Famailla	Famailla		GoogleEarth	-27	3	22	-65	24	8	-27.0561	-65.4022	No	Yes	No							Yes	No
133	D F	Segura	2006	Journal	Yes	Yes	Argentina	Tucuman	Horco-Molle	Horco-Molle		GoogleEarth	-26	47	13	-65	15	52	-26.7869	-65.2644	No	Yes	No							Yes	No
133	D F	Segura	2006	Journal	Yes	Yes	Argentina	Tucuman	La Rinconada	La Rinconada		GoogleEarth	-26	51	0	-65	19	0	-26.85	-65.3167	No	Yes	No							Yes	No
133	D F	Segura	2006	Journal	Yes	Yes	Argentina	Tucuman	Lules	Lules		GoogleEarth	-26	55	15	-65	19	45	-26.9208	-65.3292	No	Yes	No							Yes	No
133	D F	Segura	2006	Journal	Yes	Yes	Argentina	Tucuman	San Javier	San Javier		GoogleEarth	-26	47	3	-65	23	33	-26.7842	-65.3925	No	Yes	No							Yes	No
133	D F	Segura	2006	Journal	Yes	Yes	Argentina	Tucuman	Tafi Viejo	Tafi Viejo		GoogleEarth	-26	43	46	-65	15	0	-26.7294	-65.25	No	Yes	No							Yes	No
133	D F	Segura	2006	Journal	Yes	Yes	Argentina	Tucuman	Taficillo	Taficillo		GoogleEarth	-26	42	0	65	17	0	-26.7	65.2833	No	Yes	No							Yes	No
133	D F	Segura	2006	Journal	Yes	Yes	Argentina	Tucuman	Timbo	Timbo		GoogleEarth	-26	41	31	-65	8	13	-26.6919	-65.1369	No	Yes	No							Yes	No
133	D F	Segura	2006	Journal	Yes	Yes	Argentina	Buenos Aires	San Pedro	San Pedro		GoogleEarth	-33	40	58	-59	40	21	-33.6828	-59.6725	No	Yes	No			1999	11		Low	Yes	Yes						mandarin	peach	plum
133	D F	Segura	2006	Journal	Yes	Yes	Argentina	Buenos Aires	San Pedro	San Pedro		GoogleEarth	-33	40	58	-59	40	21	-33.6828	-59.6725	No	Yes	No			1999	12		Low	Yes	Yes						mandarin	peach	plum
133	D F	Segura	2006	Journal	Yes	Yes	Argentina	Buenos Aires	San Pedro	San Pedro		GoogleEarth	-33	40	58	-59	40	21	-33.6828	-59.6725	No	Yes	No			2000	1		High	Yes	Yes						mandarin	peach	plum
133	D F	Segura	2006	Journal	Yes	Yes	Argentina	Buenos Aires	San Pedro	San Pedro		GoogleEarth	-33	40	58	-59	40	21	-33.6828	-59.6725	No	Yes	No			2000	2		Peak	Yes	Yes						mandarin	peach	plum
133	D F	Segura	2006	Journal	Yes	Yes	Argentina	Buenos Aires	San Pedro	San Pedro		GoogleEarth	-33	40	58	-59	40	21	-33.6828	-59.6725	No	Yes	No			2000	3		Peak	Yes	Yes						mandarin	peach	plum
133	D F	Segura	2006	Journal	Yes	Yes	Argentina	Buenos Aires	San Pedro	San Pedro		GoogleEarth	-33	40	58	-59	40	21	-33.6828	-59.6725	No	Yes	No			2000	4		Low	Yes	Yes						mandarin	peach	plum
133	D F	Segura	2006	Journal	Yes	Yes	Argentina	Buenos Aires	San Pedro	San Pedro		GoogleEarth	-33	40	58	-59	40	21	-33.6828	-59.6725	No	Yes	No			2000	5		High	Yes	Yes						mandarin	peach	plum
129	D F	Schliserman	2004	Journal	Yes	Yes	Argentina	Tucuman	Horco-Molle	Horco-Molle		GoogleEarth	-26	47	0	-65	19	0	-26.7833	-65.3167	No	Yes	No			1999	10		Low	Yes	Yes						citrus
129	D F	Schliserman	2004	Journal	Yes	Yes	Argentina	Tucuman	Horco-Molle	Horco-Molle		GoogleEarth	-26	47	0	-65	19	0	-26.7833	-65.3167	No	Yes	No			1999	11		Low	Yes	Yes						citrus
129	D F	Schliserman	2004	Journal	Yes	Yes	Argentina	Tucuman	Horco-Molle	Horco-Molle		GoogleEarth	-26	47	0	-65	19	0	-26.7833	-65.3167	No	Yes	No			1999	12		Peak	Yes	Yes						citrus
129	D F	Schliserman	2004	Journal	Yes	Yes	Argentina	Tucuman	Horco-Molle	Horco-Molle		GoogleEarth	-26	47	0	-65	19	0	-26.7833	-65.3167	No	Yes	No			2000	1		High	Yes	Yes						citrus
129	D F	Schliserman	2004	Journal	Yes	Yes	Argentina	Tucuman	Horco-Molle	Horco-Molle		GoogleEarth	-26	47	0	-65	19	0	-26.7833	-65.3167	No	Yes	No			2000	2		Low	Yes	Yes						citrus
63	I	Hedstrom	1993	Journal	Yes	Yes	Costa Rica	Limon		Guacimo	3km NW from the city, city centre referenced	GoogleEarth	10	12	46	-83	41	12	10.2128	-83.6867	No	Yes	No	unsprayed non-commercial plantation						Yes	No	food-baited McPhall traps					guava
63	I	Hedstrom	1993	Journal	Yes	Yes	Costa Rica	Cartago	Turrialba	Turrialba		GoogleEarth	9	54	21	-83	41	3	9.90583	-83.6842	No	Yes	No							Yes	No	food-baited McPhall traps
63	I	Hedstrom	1993	Journal	Yes	Yes	Costa Rica	Alajuela		Orotina		GoogleEarth	9	54	40	-84	29	58	9.91111	-84.4994	No	Yes	No							Yes	No	food-baited McPhall traps
63	I	Hedstrom	1993	Journal	Yes	Yes	Costa Rica	Alajuela		Turrucares		GoogleEarth	9	57	38	-84	19	11	9.96056	-84.3197	No	Yes	No							Yes	No	food-baited McPhall traps
63	I	Hedstrom	1993	Journal	Yes	Yes	Costa Rica	Heredia	Puerto Viejo	La Selva	coordinates of La Selva Biological Station	GoogleEarth	10	27	11	-84	0	14	10.4531	-84.0039	No	Yes	No							Yes	No	food-baited McPhall traps					guava
63	I	Hedstrom	1993	Journal	Yes	Yes	Costa Rica	Cargato	Tucurrique	Sabanilla		GoogleEarth	9	51	33	-83	44	24	9.85917	-83.74	No	Yes	No							Yes	No	food-baited McPhall traps
63	I	Hedstrom	1993	Journal	Yes	Yes	Costa Rica	Guanacaste	Canas	Canas		GoogleEarth	10	25	35	-85	5	44	10.4264	-85.0956	No	Yes	No							Yes	No	food-baited McPhall traps
63	I	Hedstrom	1993	Journal	Yes	Yes	Costa Rica			Lepanto		GoogleEarth	9	56	32	-85	2	0	9.94222	-85.0333	No	Yes	No							Yes	No	food-baited McPhall traps
63	I	Hedstrom	1993	Journal	Yes	Yes	Costa Rica	Puntarenas	Buenos Aires	Santa Marta									#DIV/0!	#DIV/0!	No	Yes	No							Yes	No	food-baited McPhall traps
63	I	Hedstrom	1993	Journal	Yes	Yes	Costa Rica	Cargato	Tucurrique	Sabanilla		GoogleEarth	9	51	33	-83	44	24	9.85917	-83.74	No	Yes	No			1987	11		None	No	Yes	food-baited McPhall traps					sour guava
63	I	Hedstrom	1993	Journal	Yes	Yes	Costa Rica	Cargato	Tucurrique	Sabanilla		GoogleEarth	9	51	33	-83	44	24	9.85917	-83.74	No	Yes	No			1987	12		None	No	Yes	food-baited McPhall traps					sour guava
63	I	Hedstrom	1993	Journal	Yes	Yes	Costa Rica	Cargato	Tucurrique	Sabanilla		GoogleEarth	9	51	33	-83	44	24	9.85917	-83.74	No	Yes	No			1988	1		None	No	Yes	food-baited McPhall traps					sour guava
63	I	Hedstrom	1993	Journal	Yes	Yes	Costa Rica	Cargato	Tucurrique	Sabanilla		GoogleEarth	9	51	33	-83	44	24	9.85917	-83.74	No	Yes	No			1988	2		Low	Yes	Yes	food-baited McPhall traps					sour guava
63	I	Hedstrom	1993	Journal	Yes	Yes	Costa Rica	Cargato	Tucurrique	Sabanilla		GoogleEarth	9	51	33	-83	44	24	9.85917	-83.74	No	Yes	No			1988	3		Low	Yes	Yes	food-baited McPhall traps					sour guava
63	I	Hedstrom	1993	Journal	Yes	Yes	Costa Rica	Cargato	Tucurrique	Sabanilla		GoogleEarth	9	51	33	-83	44	24	9.85917	-83.74	No	Yes	No			1988	4		Peak	Yes	Yes	food-baited McPhall traps					sour guava
63	I	Hedstrom	1993	Journal	Yes	Yes	Costa Rica	Cargato	Tucurrique	Sabanilla		GoogleEarth	9	51	33	-83	44	24	9.85917	-83.74	No	Yes	No			1988	5		High	Yes	Yes	food-baited McPhall traps					sour guava
63	I	Hedstrom	1993	Journal	Yes	Yes	Costa Rica	Cargato	Tucurrique	Sabanilla		GoogleEarth	9	51	33	-83	44	24	9.85917	-83.74	No	Yes	No			1988	6		Low	Yes	Yes	food-baited McPhall traps					sour guava
63	I	Hedstrom	1993	Journal	Yes	Yes	Costa Rica	Cargato	Tucurrique	Sabanilla		GoogleEarth	9	51	33	-83	44	24	9.85917	-83.74	No	Yes	No			1988	7		None	No	Yes	food-baited McPhall traps					sour guava
63	I	Hedstrom	1993	Journal	Yes	Yes	Costa Rica	Cargato	Tucurrique	Sabanilla		GoogleEarth	9	51	33	-83	44	24	9.85917	-83.74	No	Yes	No			1988	8		None	No	Yes	food-baited McPhall traps					sour guava
63	I	Hedstrom	1993	Journal	Yes	Yes	Costa Rica	Cargato	Tucurrique	Sabanilla		GoogleEarth	9	51	33	-83	44	24	9.85917	-83.74	No	Yes	No			1988	9		None	No	Yes	food-baited McPhall traps					sour guava
63	I	Hedstrom	1993	Journal	Yes	Yes	Costa Rica	Cargato	Tucurrique	Sabanilla		GoogleEarth	9	51	33	-83	44	24	9.85917	-83.74	No	Yes	No			1988	10		None	No	Yes	food-baited McPhall traps					sour guava
63	I	Hedstrom	1993	Journal	Yes	Yes	Costa Rica	Cargato	Tucurrique	Sabanilla		GoogleEarth	9	51	33	-83	44	24	9.85917	-83.74	No	Yes	No			1988	11		None	No	Yes	food-baited McPhall traps					sour guava
63	I	Hedstrom	1993	Journal	Yes	Yes	Costa Rica	Cargato	Tucurrique	Sabanilla		GoogleEarth	9	51	33	-83	44	24	9.85917	-83.74	No	Yes	No			1988	12		None	No	Yes	food-baited McPhall traps					sour guava
63	I	Hedstrom	1993	Journal	Yes	Yes	Costa Rica	Cargato	Tucurrique	Sabanilla		GoogleEarth	9	51	33	-83	44	24	9.85917	-83.74	No	Yes	No			1989	1		None	No	Yes	food-baited McPhall traps					sour guava
63	I	Hedstrom	1993	Journal	Yes	Yes	Costa Rica	Cargato	Tucurrique	Sabanilla		GoogleEarth	9	51	33	-83	44	24	9.85917	-83.74	No	Yes	No			1989	2		None	No	Yes	food-baited McPhall traps					sour guava
63	I	Hedstrom	1993	Journal	Yes	Yes	Costa Rica	Cargato	Tucurrique	Sabanilla		GoogleEarth	9	51	33	-83	44	24	9.85917	-83.74	No	Yes	No			1989	3		Low	Yes	Yes	food-baited McPhall traps					sour guava
63	I	Hedstrom	1993	Journal	Yes	Yes	Costa Rica	Cargato	Tucurrique	Sabanilla		GoogleEarth	9	51	33	-83	44	24	9.85917	-83.74	No	Yes	No			1989	4		High	Yes	Yes	food-baited McPhall traps					sour guava
63	I	Hedstrom	1993	Journal	Yes	Yes	Costa Rica	Cargato	Tucurrique	Sabanilla		GoogleEarth	9	51	33	-83	44	24	9.85917	-83.74	No	Yes	No			1989	5		Peak	Yes	Yes	food-baited McPhall traps					sour guava
63	I	Hedstrom	1993	Journal	Yes	Yes	Costa Rica	Cargato	Tucurrique	Sabanilla		GoogleEarth	9	51	33	-83	44	24	9.85917	-83.74	No	Yes	No			1989	6		High	Yes	Yes	food-baited McPhall traps					sour guava
63	I	Hedstrom	1993	Journal	Yes	Yes	Costa Rica	Cargato	Tucurrique	Sabanilla		GoogleEarth	9	51	33	-83	44	24	9.85917	-83.74	No	Yes	No			1989	7		Low	Yes	Yes	food-baited McPhall traps					sour guava
63	I	Hedstrom	1993	Journal	Yes	Yes	Costa Rica	Cargato	Tucurrique	Sabanilla		GoogleEarth	9	51	33	-83	44	24	9.85917	-83.74	No	Yes	No			1989	8		Low	Yes	Yes	food-baited McPhall traps					sour guava
63	I	Hedstrom	1993	Journal	Yes	Yes	Costa Rica	Cargato	Tucurrique	Sabanilla		GoogleEarth	9	51	33	-83	44	24	9.85917	-83.74	No	Yes	No			1989	9		None	No	Yes	food-baited McPhall traps					sour guava
63	I	Hedstrom	1993	Journal	Yes	Yes	Costa Rica	Cargato	Tucurrique	Sabanilla		GoogleEarth	9	51	33	-83	44	24	9.85917	-83.74	No	Yes	No			1989	10		None	No	Yes	food-baited McPhall traps					sour guava
63	I	Hedstrom	1993	Journal	Yes	Yes	Costa Rica	Cargato	Tucurrique	Sabanilla		GoogleEarth	9	51	33	-83	44	24	9.85917	-83.74	No	Yes	No			1989	11		None	No	Yes	food-baited McPhall traps					sour guava
63	I	Hedstrom	1993	Journal	Yes	Yes	Costa Rica	Cargato	Tucurrique	Sabanilla		GoogleEarth	9	51	33	-83	44	24	9.85917	-83.74	No	Yes	No			1989	12		None	No	Yes	food-baited McPhall traps					sour guava
63	I	Hedstrom	1993	Journal	Yes	Yes	Costa Rica	Alajuela		Turrucares		GoogleEarth	9	57	38	-84	19	11	9.96056	-84.3197	No	Yes	No			1987	3		Low	Yes	Yes	food-baited McPhall traps					guava
63	I	Hedstrom	1993	Journal	Yes	Yes	Costa Rica	Alajuela		Turrucares		GoogleEarth	9	57	38	-84	19	11	9.96056	-84.3197	No	Yes	No			1987	4		High	Yes	Yes	food-baited McPhall traps					guava
63	I	Hedstrom	1993	Journal	Yes	Yes	Costa Rica	Alajuela		Turrucares		GoogleEarth	9	57	38	-84	19	11	9.96056	-84.3197	No	Yes	No			1987	5		Peak	Yes	Yes	food-baited McPhall traps					guava
63	I	Hedstrom	1993	Journal	Yes	Yes	Costa Rica	Alajuela		Turrucares		GoogleEarth	9	57	38	-84	19	11	9.96056	-84.3197	No	Yes	No			1987	6		Peak	Yes	Yes	food-baited McPhall traps					guava
63	I	Hedstrom	1993	Journal	Yes	Yes	Costa Rica	Alajuela		Turrucares		GoogleEarth	9	57	38	-84	19	11	9.96056	-84.3197	No	Yes	No			1987	7		Low	Yes	Yes	food-baited McPhall traps					guava
63	I	Hedstrom	1993	Journal	Yes	Yes	Costa Rica	Alajuela		Turrucares		GoogleEarth	9	57	38	-84	19	11	9.96056	-84.3197	No	Yes	No			1987	8		Low	Yes	Yes	food-baited McPhall traps					guava
63	I	Hedstrom	1993	Journal	Yes	Yes	Costa Rica	Alajuela		Turrucares		GoogleEarth	9	57	38	-84	19	11	9.96056	-84.3197	No	Yes	No			1987	9		None	No	Yes	food-baited McPhall traps					guava
63	I	Hedstrom	1993	Journal	Yes	Yes	Costa Rica	Alajuela		Turrucares		GoogleEarth	9	57	38	-84	19	11	9.96056	-84.3197	No	Yes	No			1987	10		None	No	Yes	food-baited McPhall traps					guava
63	I	Hedstrom	1993	Journal	Yes	Yes	Costa Rica	Alajuela		Turrucares		GoogleEarth	9	57	38	-84	19	11	9.96056	-84.3197	No	Yes	No			1987	11		None	No	Yes	food-baited McPhall traps					guava
63	I	Hedstrom	1993	Journal	Yes	Yes	Costa Rica	Alajuela		Turrucares		GoogleEarth	9	57	38	-84	19	11	9.96056	-84.3197	No	Yes	No			1987	12		None	No	Yes	food-baited McPhall traps					guava
63	I	Hedstrom	1993	Journal	Yes	Yes	Costa Rica	Alajuela		Turrucares		GoogleEarth	9	57	38	-84	19	11	9.96056	-84.3197	No	Yes	No			1988	1		None	No	Yes	food-baited McPhall traps					guava
63	I	Hedstrom	1993	Journal	Yes	Yes	Costa Rica	Alajuela		Turrucares		GoogleEarth	9	57	38	-84	19	11	9.96056	-84.3197	No	Yes	No			1988	2		Low	Yes	Yes	food-baited McPhall traps					guava
63	I	Hedstrom	1993	Journal	Yes	Yes	Costa Rica	Alajuela		Turrucares		GoogleEarth	9	57	38	-84	19	11	9.96056	-84.3197	No	Yes	No			1988	3		Low	Yes	Yes	food-baited McPhall traps					guava
63	I	Hedstrom	1993	Journal	Yes	Yes	Costa Rica	Alajuela		Turrucares		GoogleEarth	9	57	38	-84	19	11	9.96056	-84.3197	No	Yes	No			1988	4		Peak	Yes	Yes	food-baited McPhall traps					guava
63	I	Hedstrom	1993	Journal	Yes	Yes	Costa Rica	Alajuela		Turrucares		GoogleEarth	9	57	38	-84	19	11	9.96056	-84.3197	No	Yes	No			1988	5		Peak	Yes	Yes	food-baited McPhall traps					guava
63	I	Hedstrom	1993	Journal	Yes	Yes	Costa Rica	Alajuela		Turrucares		GoogleEarth	9	57	38	-84	19	11	9.96056	-84.3197	No	Yes	No			1988	6		High	Yes	Yes	food-baited McPhall traps					guava
63	I	Hedstrom	1993	Journal	Yes	Yes	Costa Rica	Alajuela		Turrucares		GoogleEarth	9	57	38	-84	19	11	9.96056	-84.3197	No	Yes	No			1988	7		High	Yes	Yes	food-baited McPhall traps					guava
63	I	Hedstrom	1993	Journal	Yes	Yes	Costa Rica	Alajuela		Turrucares		GoogleEarth	9	57	38	-84	19	11	9.96056	-84.3197	No	Yes	No			1988	8		Low	Yes	Yes	food-baited McPhall traps					guava
63	I	Hedstrom	1993	Journal	Yes	Yes	Costa Rica	Alajuela		Turrucares		GoogleEarth	9	57	38	-84	19	11	9.96056	-84.3197	No	Yes	No			1988	9		Low	Yes	Yes	food-baited McPhall traps					guava
63	I	Hedstrom	1993	Journal	Yes	Yes	Costa Rica	Alajuela		Turrucares		GoogleEarth	9	57	38	-84	19	11	9.96056	-84.3197	No	Yes	No			1988	10		None	No	Yes	food-baited McPhall traps					guava
63	I	Hedstrom	1993	Journal	Yes	Yes	Costa Rica	Alajuela		Turrucares		GoogleEarth	9	57	38	-84	19	11	9.96056	-84.3197	No	Yes	No			1988	11		None	No	Yes	food-baited McPhall traps					guava
63	I	Hedstrom	1993	Journal	Yes	Yes	Costa Rica	Alajuela		Turrucares		GoogleEarth	9	57	38	-84	19	11	9.96056	-84.3197	No	Yes	No			1988	12		None	No	Yes	food-baited McPhall traps					guava
63	I	Hedstrom	1993	Journal	Yes	Yes	Costa Rica	Alajuela		Turrucares		GoogleEarth	9	57	38	-84	19	11	9.96056	-84.3197	No	Yes	No			1989	1		None	No	Yes	food-baited McPhall traps					guava
63	I	Hedstrom	1993	Journal	Yes	Yes	Costa Rica	Alajuela		Turrucares		GoogleEarth	9	57	38	-84	19	11	9.96056	-84.3197	No	Yes	No			1989	2		None	No	Yes	food-baited McPhall traps					guava
63	I	Hedstrom	1993	Journal	Yes	Yes	Costa Rica	Alajuela		Turrucares		GoogleEarth	9	57	38	-84	19	11	9.96056	-84.3197	No	Yes	No			1989	3		None	No	Yes	food-baited McPhall traps					guava
63	I	Hedstrom	1993	Journal	Yes	Yes	Costa Rica	Alajuela		Turrucares		GoogleEarth	9	57	38	-84	19	11	9.96056	-84.3197	No	Yes	No			1989	4		None	No	Yes	food-baited McPhall traps					guava
63	I	Hedstrom	1993	Journal	Yes	Yes	Costa Rica	Alajuela		Turrucares		GoogleEarth	9	57	38	-84	19	11	9.96056	-84.3197	No	Yes	No			1989	5		None	No	Yes	food-baited McPhall traps					guava
68	N	Israely	2005	Journal	Yes	Yes	Israel			Kibbutz Zova		Source	31	51	8	35	5	14	31.8522	35.0872	Yes	No	No	2x3.5km rectangle		1994	1		None	No	Yes	Nadel traps baited with trimedlure				Adult
68	N	Israely	2005	Journal	Yes	Yes	Israel			Kibbutz Zova		Source	31	51	8	35	5	14	31.8522	35.0872	Yes	No	No	2x3.5km rectangle		1994	2		None	No	Yes	Nadel traps baited with trimedlure				Adult
68	N	Israely	2005	Journal	Yes	Yes	Israel			Kibbutz Zova		Source	31	51	8	35	5	14	31.8522	35.0872	Yes	No	No	2x3.5km rectangle		1994	3		None	No	Yes	Nadel traps baited with trimedlure				Adult
68	N	Israely	2005	Journal	Yes	Yes	Israel			Kibbutz Zova		Source	31	51	8	35	5	14	31.8522	35.0872	Yes	No	No	2x3.5km rectangle		1994	4		None	No	Yes	Nadel traps baited with trimedlure				Adult
68	N	Israely	2005	Journal	Yes	Yes	Israel			Kibbutz Zova		Source	31	51	8	35	5	14	31.8522	35.0872	Yes	No	No	2x3.5km rectangle		1994	5		Marginal	Yes	Yes	Nadel traps baited with trimedlure				Adult
68	N	Israely	2005	Journal	Yes	Yes	Israel			Kibbutz Zova		Source	31	51	8	35	5	14	31.8522	35.0872	Yes	No	No	2x3.5km rectangle		1994	6		Low	Yes	Yes	Nadel traps baited with trimedlure				Adult
68	N	Israely	2005	Journal	Yes	Yes	Israel			Kibbutz Zova		Source	31	51	8	35	5	14	31.8522	35.0872	Yes	No	No	2x3.5km rectangle		1994	7		Low	Yes	Yes	Nadel traps baited with trimedlure				Adult
68	N	Israely	2005	Journal	Yes	Yes	Israel			Kibbutz Zova		Source	31	51	8	35	5	14	31.8522	35.0872	Yes	No	No	2x3.5km rectangle		1994	8		Low	Yes	Yes	Nadel traps baited with trimedlure				Adult
68	N	Israely	2005	Journal	Yes	Yes	Israel			Kibbutz Zova		Source	31	51	8	35	5	14	31.8522	35.0872	Yes	No	No	2x3.5km rectangle		1994	9		Low	Yes	Yes	Nadel traps baited with trimedlure				Adult
68	N	Israely	2005	Journal	Yes	Yes	Israel			Kibbutz Zova		Source	31	51	8	35	5	14	31.8522	35.0872	Yes	No	No	2x3.5km rectangle		1994	10		Peak	Yes	Yes	Nadel traps baited with trimedlure				Adult
68	N	Israely	2005	Journal	Yes	Yes	Israel			Kibbutz Zova		Source	31	51	8	35	5	14	31.8522	35.0872	Yes	No	No	2x3.5km rectangle		1994	11		Low	Yes	Yes	Nadel traps baited with trimedlure				Adult
68	N	Israely	2005	Journal	Yes	Yes	Israel			Kibbutz Zova		Source	31	51	8	35	5	14	31.8522	35.0872	Yes	No	No	2x3.5km rectangle		1994	12		Marginal	Yes	Yes	Nadel traps baited with trimedlure				Adult
68	N	Israely	2005	Journal	Yes	Yes	Israel			Kibbutz Zova		Source	31	51	8	35	5	14	31.8522	35.0872	Yes	No	No	2x3.5km rectangle		1995	1				Yes	Nadel traps baited with trimedlure				Adult
68	N	Israely	2005	Journal	Yes	Yes	Israel			Kibbutz Zova		Source	31	51	8	35	5	14	31.8522	35.0872	Yes	No	No	2x3.5km rectangle		1995	2				Yes	Nadel traps baited with trimedlure				Adult
68	N	Israely	2005	Journal	Yes	Yes	Israel			Kibbutz Zova		Source	31	51	8	35	5	14	31.8522	35.0872	Yes	No	No	2x3.5km rectangle		1995	3				Yes	Nadel traps baited with trimedlure				Adult
68	N	Israely	2005	Journal	Yes	Yes	Israel			Kibbutz Zova		Source	31	51	8	35	5	14	31.8522	35.0872	Yes	No	No	2x3.5km rectangle		1995	4				Yes	Nadel traps baited with trimedlure				Adult
68	N	Israely	2005	Journal	Yes	Yes	Israel			Kibbutz Zova		Source	31	51	8	35	5	14	31.8522	35.0872	Yes	No	No	2x3.5km rectangle		1995	5				Yes	Nadel traps baited with trimedlure				Adult
68	N	Israely	2005	Journal	Yes	Yes	Israel			Kibbutz Zova		Source	31	51	8	35	5	14	31.8522	35.0872	Yes	No	No	2x3.5km rectangle		1995	6				Yes	Nadel traps baited with trimedlure				Adult
68	N	Israely	2005	Journal	Yes	Yes	Israel			Kibbutz Zova		Source	31	51	8	35	5	14	31.8522	35.0872	Yes	No	No	2x3.5km rectangle		1995	7				Yes	Nadel traps baited with trimedlure				Adult
68	N	Israely	2005	Journal	Yes	Yes	Israel			Kibbutz Zova		Source	31	51	8	35	5	14	31.8522	35.0872	Yes	No	No	2x3.5km rectangle		1995	8				Yes	Nadel traps baited with trimedlure				Adult
68	N	Israely	2005	Journal	Yes	Yes	Israel			Kibbutz Zova		Source	31	51	8	35	5	14	31.8522	35.0872	Yes	No	No	2x3.5km rectangle		1995	9				Yes	Nadel traps baited with trimedlure				Adult
68	N	Israely	2005	Journal	Yes	Yes	Israel			Kibbutz Zova		Source	31	51	8	35	5	14	31.8522	35.0872	Yes	No	No	2x3.5km rectangle		1995	10				Yes	Nadel traps baited with trimedlure				Adult
68	N	Israely	2005	Journal	Yes	Yes	Israel			Kibbutz Zova		Source	31	51	8	35	5	14	31.8522	35.0872	Yes	No	No	2x3.5km rectangle		1995	11				Yes	Nadel traps baited with trimedlure				Adult
68	N	Israely	2005	Journal	Yes	Yes	Israel			Kibbutz Zova		Source	31	51	8	35	5	14	31.8522	35.0872	Yes	No	No	2x3.5km rectangle		1995	12				Yes	Nadel traps baited with trimedlure				Adult
68	N	Israely	2005	Journal	Yes	Yes	Israel			Kibbutz Zova		Source	31	51	8	35	5	14	31.8522	35.0872	Yes	No	No	2x3.5km rectangle		1996	1				Yes	Nadel traps baited with trimedlure				Adult
68	N	Israely	2005	Journal	Yes	Yes	Israel			Kibbutz Zova		Source	31	51	8	35	5	14	31.8522	35.0872	Yes	No	No	2x3.5km rectangle		1996	2				Yes	Nadel traps baited with trimedlure				Adult
68	N	Israely	2005	Journal	Yes	Yes	Israel			Kibbutz Zova		Source	31	51	8	35	5	14	31.8522	35.0872	Yes	No	No	2x3.5km rectangle		1996	3				Yes	Nadel traps baited with trimedlure				Adult
68	N	Israely	2005	Journal	Yes	Yes	Israel			Kibbutz Zova		Source	31	51	8	35	5	14	31.8522	35.0872	Yes	No	No	2x3.5km rectangle		1996	4				Yes	Nadel traps baited with trimedlure				Adult
68	N	Israely	2005	Journal	Yes	Yes	Israel			Kibbutz Zova		Source	31	51	8	35	5	14	31.8522	35.0872	Yes	No	No	2x3.5km rectangle		1996	5				Yes	Nadel traps baited with trimedlure				Adult
68	N	Israely	2005	Journal	Yes	Yes	Israel			Kibbutz Zova		Source	31	51	8	35	5	14	31.8522	35.0872	Yes	No	No	2x3.5km rectangle		1996	6				Yes	Nadel traps baited with trimedlure				Adult
68	N	Israely	2005	Journal	Yes	Yes	Israel			Kibbutz Zova		Source	31	51	8	35	5	14	31.8522	35.0872	Yes	No	No	2x3.5km rectangle		1996	7				Yes	Nadel traps baited with trimedlure				Adult
68	N	Israely	2005	Journal	Yes	Yes	Israel			Kibbutz Zova		Source	31	51	8	35	5	14	31.8522	35.0872	Yes	No	No	2x3.5km rectangle		1996	8				Yes	Nadel traps baited with trimedlure				Adult
68	N	Israely	2005	Journal	Yes	Yes	Israel			Kibbutz Zova		Source	31	51	8	35	5	14	31.8522	35.0872	Yes	No	No	2x3.5km rectangle		1996	9				Yes	Nadel traps baited with trimedlure				Adult
68	N	Israely	2005	Journal	Yes	Yes	Israel			Kibbutz Zova		Source	31	51	8	35	5	14	31.8522	35.0872	Yes	No	No	2x3.5km rectangle		1996	10				Yes	Nadel traps baited with trimedlure				Adult
68	N	Israely	2005	Journal	Yes	Yes	Israel			Kibbutz Zova		Source	31	51	8	35	5	14	31.8522	35.0872	Yes	No	No	2x3.5km rectangle		1996	11				Yes	Nadel traps baited with trimedlure				Adult
68	N	Israely	2005	Journal	Yes	Yes	Israel			Kibbutz Zova		Source	31	51	8	35	5	14	31.8522	35.0872	Yes	No	No	2x3.5km rectangle		1996	12				Yes	Nadel traps baited with trimedlure				Adult
68	N	Israely	2005	Journal	Yes	Yes	Israel			Kibbutz Zova		Source	31	51	8	35	5	14	31.8522	35.0872	Yes	No	No	2x3.5km rectangle		1997	1				Yes	Nadel traps baited with trimedlure				Adult
68	N	Israely	2005	Journal	Yes	Yes	Israel			Kibbutz Zova		Source	31	51	8	35	5	14	31.8522	35.0872	Yes	No	No	2x3.5km rectangle		1997	2				Yes	Nadel traps baited with trimedlure				Adult
68	N	Israely	2005	Journal	Yes	Yes	Israel			Kibbutz Zova		Source	31	51	8	35	5	14	31.8522	35.0872	Yes	No	No	2x3.5km rectangle		1997	3				Yes	Nadel traps baited with trimedlure				Adult
68	N	Israely	2005	Journal	Yes	Yes	Israel			Kibbutz Zova		Source	31	51	8	35	5	14	31.8522	35.0872	Yes	No	No	2x3.5km rectangle		1997	4				Yes	Nadel traps baited with trimedlure				Adult
68	N	Israely	2005	Journal	Yes	Yes	Israel			Kibbutz Zova		Source	31	51	8	35	5	14	31.8522	35.0872	Yes	No	No	2x3.5km rectangle		1997	5				Yes	Nadel traps baited with trimedlure				Adult
68	N	Israely	2005	Journal	Yes	Yes	Israel			Kibbutz Zova		Source	31	51	8	35	5	14	31.8522	35.0872	Yes	No	No	2x3.5km rectangle		1997	6				Yes	Nadel traps baited with trimedlure				Adult
68	N	Israely	2005	Journal	Yes	Yes	Israel			Kibbutz Zova		Source	31	51	8	35	5	14	31.8522	35.0872	Yes	No	No	2x3.5km rectangle		1997	7				Yes	Nadel traps baited with trimedlure				Adult
68	N	Israely	2005	Journal	Yes	Yes	Israel			Kibbutz Zova		Source	31	51	8	35	5	14	31.8522	35.0872	Yes	No	No	2x3.5km rectangle		1997	8				Yes	Nadel traps baited with trimedlure				Adult
68	N	Israely	2005	Journal	Yes	Yes	Israel			Kibbutz Zova		Source	31	51	8	35	5	14	31.8522	35.0872	Yes	No	No	2x3.5km rectangle		1997	9				Yes	Nadel traps baited with trimedlure				Adult
68	N	Israely	2005	Journal	Yes	Yes	Israel			Kibbutz Zova		Source	31	51	8	35	5	14	31.8522	35.0872	Yes	No	No	2x3.5km rectangle		1997	10				Yes	Nadel traps baited with trimedlure				Adult
68	N	Israely	2005	Journal	Yes	Yes	Israel			Kibbutz Zova		Source	31	51	8	35	5	14	31.8522	35.0872	Yes	No	No	2x3.5km rectangle		1997	11				Yes	Nadel traps baited with trimedlure				Adult
68	N	Israely	2005	Journal	Yes	Yes	Israel			Kibbutz Zova		Source	31	51	8	35	5	14	31.8522	35.0872	Yes	No	No	2x3.5km rectangle		1997	12				Yes	Nadel traps baited with trimedlure				Adult
68	N	Israely	2005	Journal	Yes	Yes	Israel			Kibbutz Zova		Source	31	51	8	35	5	14	31.8522	35.0872	Yes	No	No	2x3.5km rectangle		1998	1				Yes	Nadel traps baited with trimedlure				Adult
68	N	Israely	2005	Journal	Yes	Yes	Israel			Kibbutz Zova		Source	31	51	8	35	5	14	31.8522	35.0872	Yes	No	No	2x3.5km rectangle		1998	2				Yes	Nadel traps baited with trimedlure				Adult
68	N	Israely	2005	Journal	Yes	Yes	Israel			Kibbutz Zova		Source	31	51	8	35	5	14	31.8522	35.0872	Yes	No	No	2x3.5km rectangle		1998	3				Yes	Nadel traps baited with trimedlure				Adult
68	N	Israely	2005	Journal	Yes	Yes	Israel			Kibbutz Zova		Source	31	51	8	35	5	14	31.8522	35.0872	Yes	No	No	2x3.5km rectangle		1998	4				Yes	Nadel traps baited with trimedlure				Adult
68	N	Israely	2005	Journal	Yes	Yes	Israel			Kibbutz Zova		Source	31	51	8	35	5	14	31.8522	35.0872	Yes	No	No	2x3.5km rectangle		1998	5				Yes	Nadel traps baited with trimedlure				Adult
68	N	Israely	2005	Journal	Yes	Yes	Israel			Kibbutz Zova		Source	31	51	8	35	5	14	31.8522	35.0872	Yes	No	No	2x3.5km rectangle		1998	6				Yes	Nadel traps baited with trimedlure				Adult
68	N	Israely	2005	Journal	Yes	Yes	Israel			Kibbutz Zova		Source	31	51	8	35	5	14	31.8522	35.0872	Yes	No	No	2x3.5km rectangle		1998	7				Yes	Nadel traps baited with trimedlure				Adult
68	N	Israely	2005	Journal	Yes	Yes	Israel			Kibbutz Zova		Source	31	51	8	35	5	14	31.8522	35.0872	Yes	No	No	2x3.5km rectangle		1998	8				Yes	Nadel traps baited with trimedlure				Adult
68	N	Israely	2005	Journal	Yes	Yes	Israel			Kibbutz Zova		Source	31	51	8	35	5	14	31.8522	35.0872	Yes	No	No	2x3.5km rectangle		1998	9				Yes	Nadel traps baited with trimedlure				Adult
68	N	Israely	2005	Journal	Yes	Yes	Israel			Kibbutz Zova		Source	31	51	8	35	5	14	31.8522	35.0872	Yes	No	No	2x3.5km rectangle		1998	10				Yes	Nadel traps baited with trimedlure				Adult
68	N	Israely	2005	Journal	Yes	Yes	Israel			Kibbutz Zova		Source	31	51	8	35	5	14	31.8522	35.0872	Yes	No	No	2x3.5km rectangle		1998	11				Yes	Nadel traps baited with trimedlure				Adult
68	N	Israely	2005	Journal	Yes	Yes	Israel			Kibbutz Zova		Source	31	51	8	35	5	14	31.8522	35.0872	Yes	No	No	2x3.5km rectangle		1998	12				Yes	Nadel traps baited with trimedlure				Adult
68	N	Israely	2005	Journal	Yes	Yes	Israel			Kibbutz Zova		Source	31	51	8	35	5	14	31.8522	35.0872	Yes	No	No	2x3.5km rectangle		1999	1				Yes	Nadel traps baited with trimedlure				Adult
68	N	Israely	2005	Journal	Yes	Yes	Israel			Kibbutz Zova		Source	31	51	8	35	5	14	31.8522	35.0872	Yes	No	No	2x3.5km rectangle		1999	2				Yes	Nadel traps baited with trimedlure				Adult
68	N	Israely	2005	Journal	Yes	Yes	Israel			Kibbutz Zova		Source	31	51	8	35	5	14	31.8522	35.0872	Yes	No	No	2x3.5km rectangle		1999	3				Yes	Nadel traps baited with trimedlure				Adult
68	N	Israely	2005	Journal	Yes	Yes	Israel			Kibbutz Zova		Source	31	51	8	35	5	14	31.8522	35.0872	Yes	No	No	2x3.5km rectangle		1999	4				Yes	Nadel traps baited with trimedlure				Adult
68	N	Israely	2005	Journal	Yes	Yes	Israel			Kibbutz Zova		Source	31	51	8	35	5	14	31.8522	35.0872	Yes	No	No	2x3.5km rectangle		1999	5				Yes	Nadel traps baited with trimedlure				Adult
68	N	Israely	2005	Journal	Yes	Yes	Israel			Kibbutz Zova		Source	31	51	8	35	5	14	31.8522	35.0872	Yes	No	No	2x3.5km rectangle		1999	6				Yes	Nadel traps baited with trimedlure				Adult
68	N	Israely	2005	Journal	Yes	Yes	Israel			Kibbutz Zova		Source	31	51	8	35	5	14	31.8522	35.0872	Yes	No	No	2x3.5km rectangle		1999	7				Yes	Nadel traps baited with trimedlure				Adult
68	N	Israely	2005	Journal	Yes	Yes	Israel			Kibbutz Zova		Source	31	51	8	35	5	14	31.8522	35.0872	Yes	No	No	2x3.5km rectangle		1999	8				Yes	Nadel traps baited with trimedlure				Adult
68	N	Israely	2005	Journal	Yes	Yes	Israel			Kibbutz Zova		Source	31	51	8	35	5	14	31.8522	35.0872	Yes	No	No	2x3.5km rectangle		1999	9				Yes	Nadel traps baited with trimedlure				Adult
68	N	Israely	2005	Journal	Yes	Yes	Israel			Kibbutz Zova		Source	31	51	8	35	5	14	31.8522	35.0872	Yes	No	No	2x3.5km rectangle		1999	10				Yes	Nadel traps baited with trimedlure				Adult
68	N	Israely	2005	Journal	Yes	Yes	Israel			Kibbutz Zova		Source	31	51	8	35	5	14	31.8522	35.0872	Yes	No	No	2x3.5km rectangle		1999	11				Yes	Nadel traps baited with trimedlure				Adult
68	N	Israely	2005	Journal	Yes	Yes	Israel			Kibbutz Zova		Source	31	51	8	35	5	14	31.8522	35.0872	Yes	No	No	2x3.5km rectangle		1999	12				Yes	Nadel traps baited with trimedlure				Adult
68	N	Israely	2005	Journal	Yes	Yes	Israel			Kibbutz Zova		Source	31	51	8	35	5	14	31.8522	35.0872	Yes	No	No	2x3.5km rectangle		2000	1				Yes	Nadel traps baited with trimedlure				Adult
68	N	Israely	2005	Journal	Yes	Yes	Israel			Kibbutz Zova		Source	31	51	8	35	5	14	31.8522	35.0872	Yes	No	No	2x3.5km rectangle		2000	2				Yes	Nadel traps baited with trimedlure				Adult
68	N	Israely	2005	Journal	Yes	Yes	Israel			Kibbutz Zova		Source	31	51	8	35	5	14	31.8522	35.0872	Yes	No	No	2x3.5km rectangle		2000	3				Yes	Nadel traps baited with trimedlure				Adult
68	N	Israely	2005	Journal	Yes	Yes	Israel			Kibbutz Zova		Source	31	51	8	35	5	14	31.8522	35.0872	Yes	No	No	2x3.5km rectangle		2000	4				Yes	Nadel traps baited with trimedlure				Adult
68	N	Israely	2005	Journal	Yes	Yes	Israel			Kibbutz Zova		Source	31	51	8	35	5	14	31.8522	35.0872	Yes	No	No	2x3.5km rectangle		2000	5				Yes	Nadel traps baited with trimedlure				Adult
68	N	Israely	2005	Journal	Yes	Yes	Israel			Kibbutz Zova		Source	31	51	8	35	5	14	31.8522	35.0872	Yes	No	No	2x3.5km rectangle		2000	6				Yes	Nadel traps baited with trimedlure				Adult
68	N	Israely	2005	Journal	Yes	Yes	Israel			Kibbutz Zova		Source	31	51	8	35	5	14	31.8522	35.0872	Yes	No	No	2x3.5km rectangle		2000	7				Yes	Nadel traps baited with trimedlure				Adult
68	N	Israely	2005	Journal	Yes	Yes	Israel			Kibbutz Zova		Source	31	51	8	35	5	14	31.8522	35.0872	Yes	No	No	2x3.5km rectangle		2000	8				Yes	Nadel traps baited with trimedlure				Adult
68	N	Israely	2005	Journal	Yes	Yes	Israel			Kibbutz Zova		Source	31	51	8	35	5	14	31.8522	35.0872	Yes	No	No	2x3.5km rectangle		2000	9				Yes	Nadel traps baited with trimedlure				Adult
68	N	Israely	2005	Journal	Yes	Yes	Israel			Kibbutz Zova		Source	31	51	8	35	5	14	31.8522	35.0872	Yes	No	No	2x3.5km rectangle		2000	10				Yes	Nadel traps baited with trimedlure				Adult
68	N	Israely	2005	Journal	Yes	Yes	Israel			Kibbutz Zova		Source	31	51	8	35	5	14	31.8522	35.0872	Yes	No	No	2x3.5km rectangle		2000	11				Yes	Nadel traps baited with trimedlure				Adult
68	N	Israely	2005	Journal	Yes	Yes	Israel			Kibbutz Zova		Source	31	51	8	35	5	14	31.8522	35.0872	Yes	No	No	2x3.5km rectangle		2000	12				Yes	Nadel traps baited with trimedlure				Adult
68	N	Israely	2005	Journal	Yes	Yes	Israel			Kibbutz Zova		Source	31	51	8	35	5	14	31.8522	35.0872	Yes	No	No	2x3.5km rectangle		2001	1				Yes	Nadel traps baited with trimedlure				Adult
68	N	Israely	2005	Journal	Yes	Yes	Israel			Kibbutz Zova		Source	31	51	8	35	5	14	31.8522	35.0872	Yes	No	No	2x3.5km rectangle		2001	2				Yes	Nadel traps baited with trimedlure				Adult
68	N	Israely	2005	Journal	Yes	Yes	Israel			Kibbutz Zova		Source	31	51	8	35	5	14	31.8522	35.0872	Yes	No	No	2x3.5km rectangle		2001	3				Yes	Nadel traps baited with trimedlure				Adult
68	N	Israely	2005	Journal	Yes	Yes	Israel			Kibbutz Zova		Source	31	51	8	35	5	14	31.8522	35.0872	Yes	No	No	2x3.5km rectangle		2001	4				Yes	Nadel traps baited with trimedlure				Adult
68	N	Israely	2005	Journal	Yes	Yes	Israel			Kibbutz Zova		Source	31	51	8	35	5	14	31.8522	35.0872	Yes	No	No	2x3.5km rectangle		2001	5				Yes	Nadel traps baited with trimedlure				Adult
68	N	Israely	2005	Journal	Yes	Yes	Israel			Kibbutz Zova		Source	31	51	8	35	5	14	31.8522	35.0872	Yes	No	No	2x3.5km rectangle		2001	6				Yes	Nadel traps baited with trimedlure				Adult
68	N	Israely	2005	Journal	Yes	Yes	Israel			Kibbutz Zova		Source	31	51	8	35	5	14	31.8522	35.0872	Yes	No	No	2x3.5km rectangle		2001	7				Yes	Nadel traps baited with trimedlure				Adult
68	N	Israely	2005	Journal	Yes	Yes	Israel			Kibbutz Zova		Source	31	51	8	35	5	14	31.8522	35.0872	Yes	No	No	2x3.5km rectangle		2001	8				Yes	Nadel traps baited with trimedlure				Adult
68	N	Israely	2005	Journal	Yes	Yes	Israel			Kibbutz Zova		Source	31	51	8	35	5	14	31.8522	35.0872	Yes	No	No	2x3.5km rectangle		2001	9				Yes	Nadel traps baited with trimedlure				Adult
68	N	Israely	2005	Journal	Yes	Yes	Israel			Kibbutz Zova		Source	31	51	8	35	5	14	31.8522	35.0872	Yes	No	No	2x3.5km rectangle		2001	10				Yes	Nadel traps baited with trimedlure				Adult
68	N	Israely	2005	Journal	Yes	Yes	Israel			Kibbutz Zova		Source	31	51	8	35	5	14	31.8522	35.0872	Yes	No	No	2x3.5km rectangle		2001	11				Yes	Nadel traps baited with trimedlure				Adult
68	N	Israely	2005	Journal	Yes	Yes	Israel			Kibbutz Zova		Source	31	51	8	35	5	14	31.8522	35.0872	Yes	No	No	2x3.5km rectangle		2001	12				Yes	Nadel traps baited with trimedlure				Adult
1	F A	Abdel-Galil	2010	Journal	Yes	Yes	Egypt	New Valley Governorate	Kharga oases	Kharga oases	Points estimated from the map in the paper	GoogleEarth	25	26	57	30	33	19	25.4492	30.5553	No	Yes	No	location estimated from the point in the paper		2005	4		High	Yes	Yes	Yellow sticky trap with trimedflure	0.66	Abdel-Kawi trap with trimedlure	1.32	Adult
1	F A	Abdel-Galil	2010	Journal	Yes	Yes	Egypt	New Valley Governorate	Kharga oases	Kharga oases	Points estimated from the map in the paper	GoogleEarth	25	26	57	30	33	19	25.4492	30.5553	No	Yes	No	location estimated from the point in the paper		2005	5		Low	Yes	Yes	Yellow sticky trap with trimedflure	0.59	Abdel-Kawi trap with trimedlure	0.84	Adult
1	F A	Abdel-Galil	2010	Journal	Yes	Yes	Egypt	New Valley Governorate	Kharga oases	Kharga oases	Points estimated from the map in the paper	GoogleEarth	25	26	57	30	33	19	25.4492	30.5553	No	Yes	No	location estimated from the point in the paper		2005	6		None	No	Yes	Yellow sticky trap with trimedflure	0	Abdel-Kawi trap with trimedlure	0	Adult
1	F A	Abdel-Galil	2010	Journal	Yes	Yes	Egypt	New Valley Governorate	Kharga oases	Kharga oases	Points estimated from the map in the paper	GoogleEarth	25	26	57	30	33	19	25.4492	30.5553	No	Yes	No	location estimated from the point in the paper		2005	7		None	No	Yes	Yellow sticky trap with trimedflure	0	Abdel-Kawi trap with trimedlure	0	Adult
1	F A	Abdel-Galil	2010	Journal	Yes	Yes	Egypt	New Valley Governorate	Kharga oases	Kharga oases	Points estimated from the map in the paper	GoogleEarth	25	26	57	30	33	19	25.4492	30.5553	No	Yes	No	location estimated from the point in the paper		2005	8		None	No	Yes	Yellow sticky trap with trimedflure	0	Abdel-Kawi trap with trimedlure	0	Adult
1	F A	Abdel-Galil	2010	Journal	Yes	Yes	Egypt	New Valley Governorate	Kharga oases	Kharga oases	Points estimated from the map in the paper	GoogleEarth	25	26	57	30	33	19	25.4492	30.5553	No	Yes	No	location estimated from the point in the paper		2005	9		Low	Yes	Yes	Yellow sticky trap with trimedflure	0.51	Abdel-Kawi trap with trimedlure	0.67	Adult
1	F A	Abdel-Galil	2010	Journal	Yes	Yes	Egypt	New Valley Governorate	Kharga oases	Kharga oases	Points estimated from the map in the paper	GoogleEarth	25	26	57	30	33	19	25.4492	30.5553	No	Yes	No	location estimated from the point in the paper		2005	10		Peak	Yes	Yes	Yellow sticky trap with trimedflure	0.47	Abdel-Kawi trap with trimedlure	3.19	Adult
1	F A	Abdel-Galil	2010	Journal	Yes	Yes	Egypt	New Valley Governorate	Kharga oases	Kharga oases	Points estimated from the map in the paper	GoogleEarth	25	26	57	30	33	19	25.4492	30.5553	No	Yes	No	location estimated from the point in the paper		2005	11		High	Yes	Yes	Yellow sticky trap with trimedflure	0.66	Abdel-Kawi trap with trimedlure	1.41	Adult
1	F A	Abdel-Galil	2010	Journal	Yes	Yes	Egypt	New Valley Governorate	Kharga oases	Kharga oases	Points estimated from the map in the paper	GoogleEarth	25	26	57	30	33	19	25.4492	30.5553	No	Yes	No	location estimated from the point in the paper		2005	12		High	Yes	Yes	Yellow sticky trap with trimedflure	0.27	Abdel-Kawi trap with trimedlure	1.2	Adult
1	F A	Abdel-Galil	2010	Journal	Yes	Yes	Egypt	New Valley Governorate	Kharga oases	Kharga oases	Points estimated from the map in the paper	GoogleEarth	25	26	57	30	33	19	25.4492	30.5553	No	Yes	No	location estimated from the point in the paper		2006	1		High	Yes	Yes	Yellow sticky trap with trimedflure	0.74	Abdel-Kawi trap with trimedlure	1.75	Adult
1	F A	Abdel-Galil	2010	Journal	Yes	Yes	Egypt	New Valley Governorate	Kharga oases	Kharga oases	Points estimated from the map in the paper	GoogleEarth	25	26	57	30	33	19	25.4492	30.5553	No	Yes	No	location estimated from the point in the paper		2006	2		Peak	Yes	Yes	Yellow sticky trap with trimedflure	0.99	Abdel-Kawi trap with trimedlure	3.65	Adult
1	F A	Abdel-Galil	2010	Journal	Yes	Yes	Egypt	New Valley Governorate	Kharga oases	Kharga oases	Points estimated from the map in the paper	GoogleEarth	25	26	57	30	33	19	25.4492	30.5553	No	Yes	No	location estimated from the point in the paper		2006	3		Peak	Yes	Yes	Yellow sticky trap with trimedflure	1.67	Abdel-Kawi trap with trimedlure	2.91	Adult
1	F A	Abdel-Galil	2010	Journal	Yes	Yes	Egypt	New Valley Governorate	Kharga oases	Kharga oases	Points estimated from the map in the paper	GoogleEarth	25	26	57	30	33	19	25.4492	30.5553	No	Yes	No	location estimated from the point in the paper		2006	4		High	Yes	Yes	Yellow sticky trap with trimedflure	0.74	Abdel-Kawi trap with trimedlure	1.53	Adult
1	F A	Abdel-Galil	2010	Journal	Yes	Yes	Egypt	New Valley Governorate	Kharga oases	Kharga oases	Points estimated from the map in the paper	GoogleEarth	25	26	57	30	33	19	25.4492	30.5553	No	Yes	No	location estimated from the point in the paper		2006	5		Peak	Yes	Yes	Yellow sticky trap with trimedflure	0.33	Abdel-Kawi trap with trimedlure	2.65	Adult
1	F A	Abdel-Galil	2010	Journal	Yes	Yes	Egypt	New Valley Governorate	Kharga oases	Kharga oases	Points estimated from the map in the paper	GoogleEarth	25	26	57	30	33	19	25.4492	30.5553	No	Yes	No	location estimated from the point in the paper		2006	6		Low	Yes	Yes	Yellow sticky trap with trimedflure	0.33	Abdel-Kawi trap with trimedlure	0.66	Adult
1	F A	Abdel-Galil	2010	Journal	Yes	Yes	Egypt	New Valley Governorate	Kharga oases	Kharga oases	Points estimated from the map in the paper	GoogleEarth	25	26	57	30	33	19	25.4492	30.5553	No	Yes	No	location estimated from the point in the paper		2006	7		Marginal	Yes	Yes	Yellow sticky trap with trimedflure	0.07	Abdel-Kawi trap with trimedlure	0.14	Adult
1	F A	Abdel-Galil	2010	Journal	Yes	Yes	Egypt	New Valley Governorate	Kharga oases	Kharga oases	Points estimated from the map in the paper	GoogleEarth	25	26	57	30	33	19	25.4492	30.5553	No	Yes	No	location estimated from the point in the paper		2006	8		Low	Yes	Yes	Yellow sticky trap with trimedflure	0	Abdel-Kawi trap with trimedlure	0.58	Adult
1	F A	Abdel-Galil	2010	Journal	Yes	Yes	Egypt	New Valley Governorate	Kharga oases	Kharga oases	Points estimated from the map in the paper	GoogleEarth	25	26	57	30	33	19	25.4492	30.5553	No	Yes	No	location estimated from the point in the paper		2006	9		Low	Yes	Yes	Yellow sticky trap with trimedflure	0.33	Abdel-Kawi trap with trimedlure	0.41	Adult
1	F A	Abdel-Galil	2010	Journal	Yes	Yes	Egypt	New Valley Governorate	Kharga oases	Kharga oases	Points estimated from the map in the paper	GoogleEarth	25	26	57	30	33	19	25.4492	30.5553	No	Yes	No	location estimated from the point in the paper		2006	10		Marginal	Yes	Yes	Yellow sticky trap with trimedflure	0	Abdel-Kawi trap with trimedlure	0.14	Adult
1	F A	Abdel-Galil	2010	Journal	Yes	Yes	Egypt	New Valley Governorate	Kharga oases	Kharga oases	Points estimated from the map in the paper	GoogleEarth	25	26	57	30	33	19	25.4492	30.5553	No	Yes	No	location estimated from the point in the paper		2006	11		Low	Yes	Yes	Yellow sticky trap with trimedflure	0	Abdel-Kawi trap with trimedlure	0.16	Adult
1	F A	Abdel-Galil	2010	Journal	Yes	Yes	Egypt	New Valley Governorate	Kharga oases	Kharga oases	Points estimated from the map in the paper	GoogleEarth	25	26	57	30	33	19	25.4492	30.5553	No	Yes	No	location estimated from the point in the paper		2006	12		Marginal	Yes	Yes	Yellow sticky trap with trimedflure	0.13	Abdel-Kawi trap with trimedlure	0.91	Adult
1	F A	Abdel-Galil	2010	Journal	Yes	Yes	Egypt	New Valley Governorate	Kharga oases	Kharga oases	Points estimated from the map in the paper	GoogleEarth	25	26	57	30	33	19	25.4492	30.5553	No	Yes	No	location estimated from the point in the paper		2007	1		Low	Yes	Yes	Yellow sticky trap with trimedflure	0	Abdel-Kawi trap with trimedlure	0.42	Adult
1	F A	Abdel-Galil	2010	Journal	Yes	Yes	Egypt	New Valley Governorate	Kharga oases	Kharga oases	Points estimated from the map in the paper	GoogleEarth	25	26	57	30	33	19	25.4492	30.5553	No	Yes	No	location estimated from the point in the paper		2007	2		None	No	Yes	Yellow sticky trap with trimedflure	0	Abdel-Kawi trap with trimedlure	0	Adult
1	F A	Abdel-Galil	2010	Journal	Yes	Yes	Egypt	New Valley Governorate	Kharga oases	Kharga oases	Points estimated from the map in the paper	GoogleEarth	25	26	57	30	33	19	25.4492	30.5553	No	Yes	No	location estimated from the point in the paper		2007	3		None	No	Yes	Yellow sticky trap with trimedflure	0	Abdel-Kawi trap with trimedlure	0	Adult
1	F A	Abdel-Galil	2010	Journal	Yes	Yes	Egypt	New Valley Governorate	Dakhla Oases	Moot	Points estimated from the map in the paper	GoogleEarth	25	28	41	28	58	54	25.4781	28.9817	No	Yes	No	location estimated from the point in the paper		2005	4		None	No	Yes	Yellow sticky trap with trimedflure	0	Abdel-Kawi trap with trimedlure	0	Adult
1	F A	Abdel-Galil	2010	Journal	Yes	Yes	Egypt	New Valley Governorate	Dakhla Oases	Moot	Points estimated from the map in the paper	GoogleEarth	25	28	41	28	58	54	25.4781	28.9817	No	Yes	No	location estimated from the point in the paper		2005	5		None	No	Yes	Yellow sticky trap with trimedflure	0	Abdel-Kawi trap with trimedlure	0	Adult
1	F A	Abdel-Galil	2010	Journal	Yes	Yes	Egypt	New Valley Governorate	Dakhla Oases	Moot	Points estimated from the map in the paper	GoogleEarth	25	28	41	28	58	54	25.4781	28.9817	No	Yes	No	location estimated from the point in the paper		2005	6		Low	Yes	Yes	Yellow sticky trap with trimedflure	0.58	Abdel-Kawi trap with trimedlure	0.58	Adult
1	F A	Abdel-Galil	2010	Journal	Yes	Yes	Egypt	New Valley Governorate	Dakhla Oases	Moot	Points estimated from the map in the paper	GoogleEarth	25	28	41	28	58	54	25.4781	28.9817	No	Yes	No	location estimated from the point in the paper		2005	7		None	No	Yes	Yellow sticky trap with trimedflure	0	Abdel-Kawi trap with trimedlure	0	Adult
1	F A	Abdel-Galil	2010	Journal	Yes	Yes	Egypt	New Valley Governorate	Dakhla Oases	Moot	Points estimated from the map in the paper	GoogleEarth	25	28	41	28	58	54	25.4781	28.9817	No	Yes	No	location estimated from the point in the paper		2005	8		None	No	Yes	Yellow sticky trap with trimedflure	0	Abdel-Kawi trap with trimedlure	0	Adult
1	F A	Abdel-Galil	2010	Journal	Yes	Yes	Egypt	New Valley Governorate	Dakhla Oases	Moot	Points estimated from the map in the paper	GoogleEarth	25	28	41	28	58	54	25.4781	28.9817	No	Yes	No	location estimated from the point in the paper		2005	9		None	No	Yes	Yellow sticky trap with trimedflure	0	Abdel-Kawi trap with trimedlure	0	Adult
1	F A	Abdel-Galil	2010	Journal	Yes	Yes	Egypt	New Valley Governorate	Dakhla Oases	Moot	Points estimated from the map in the paper	GoogleEarth	25	28	41	28	58	54	25.4781	28.9817	No	Yes	No	location estimated from the point in the paper		2005	10		None	No	Yes	Yellow sticky trap with trimedflure	0	Abdel-Kawi trap with trimedlure	0	Adult
1	F A	Abdel-Galil	2010	Journal	Yes	Yes	Egypt	New Valley Governorate	Dakhla Oases	Moot	Points estimated from the map in the paper	GoogleEarth	25	28	41	28	58	54	25.4781	28.9817	No	Yes	No	location estimated from the point in the paper		2005	11		None	No	Yes	Yellow sticky trap with trimedflure	0	Abdel-Kawi trap with trimedlure	0	Adult
1	F A	Abdel-Galil	2010	Journal	Yes	Yes	Egypt	New Valley Governorate	Dakhla Oases	Moot	Points estimated from the map in the paper	GoogleEarth	25	28	41	28	58	54	25.4781	28.9817	No	Yes	No	location estimated from the point in the paper		2005	12		None	No	Yes	Yellow sticky trap with trimedflure	0	Abdel-Kawi trap with trimedlure	0	Adult
1	F A	Abdel-Galil	2010	Journal	Yes	Yes	Egypt	New Valley Governorate	Dakhla Oases	Moot	Points estimated from the map in the paper	GoogleEarth	25	28	41	28	58	54	25.4781	28.9817	No	Yes	No	location estimated from the point in the paper		2006	1		None	No	Yes	Yellow sticky trap with trimedflure	0	Abdel-Kawi trap with trimedlure	0	Adult
1	F A	Abdel-Galil	2010	Journal	Yes	Yes	Egypt	New Valley Governorate	Dakhla Oases	Moot	Points estimated from the map in the paper	GoogleEarth	25	28	41	28	58	54	25.4781	28.9817	No	Yes	No	location estimated from the point in the paper		2006	2		None	No	Yes	Yellow sticky trap with trimedflure	0	Abdel-Kawi trap with trimedlure	0	Adult
1	F A	Abdel-Galil	2010	Journal	Yes	Yes	Egypt	New Valley Governorate	Dakhla Oases	Moot	Points estimated from the map in the paper	GoogleEarth	25	28	41	28	58	54	25.4781	28.9817	No	Yes	No	location estimated from the point in the paper		2006	3		None	No	Yes	Yellow sticky trap with trimedflure	0	Abdel-Kawi trap with trimedlure	0	Adult
1	F A	Abdel-Galil	2010	Journal	Yes	Yes	Egypt	New Valley Governorate	Dakhla Oases	Moot	Points estimated from the map in the paper	GoogleEarth	25	28	41	28	58	54	25.4781	28.9817	No	Yes	No	location estimated from the point in the paper		2006	4		None	No	Yes	Yellow sticky trap with trimedflure	0	Abdel-Kawi trap with trimedlure	0	Adult
1	F A	Abdel-Galil	2010	Journal	Yes	Yes	Egypt	New Valley Governorate	Dakhla Oases	Moot	Points estimated from the map in the paper	GoogleEarth	25	28	41	28	58	54	25.4781	28.9817	No	Yes	No	location estimated from the point in the paper		2006	5		None	No	Yes	Yellow sticky trap with trimedflure	0	Abdel-Kawi trap with trimedlure	0	Adult
1	F A	Abdel-Galil	2010	Journal	Yes	Yes	Egypt	New Valley Governorate	Dakhla Oases	Moot	Points estimated from the map in the paper	GoogleEarth	25	28	41	28	58	54	25.4781	28.9817	No	Yes	No	location estimated from the point in the paper		2006	6		None	No	Yes	Yellow sticky trap with trimedflure	0	Abdel-Kawi trap with trimedlure	0	Adult
1	F A	Abdel-Galil	2010	Journal	Yes	Yes	Egypt	New Valley Governorate	Dakhla Oases	Moot	Points estimated from the map in the paper	GoogleEarth	25	28	41	28	58	54	25.4781	28.9817	No	Yes	No	location estimated from the point in the paper		2006	7		None	No	Yes	Yellow sticky trap with trimedflure	0	Abdel-Kawi trap with trimedlure	0	Adult
1	F A	Abdel-Galil	2010	Journal	Yes	Yes	Egypt	New Valley Governorate	Dakhla Oases	Moot	Points estimated from the map in the paper	GoogleEarth	25	28	41	28	58	54	25.4781	28.9817	No	Yes	No	location estimated from the point in the paper		2006	8		None	No	Yes	Yellow sticky trap with trimedflure	0	Abdel-Kawi trap with trimedlure	0	Adult
1	F A	Abdel-Galil	2010	Journal	Yes	Yes	Egypt	New Valley Governorate	Dakhla Oases	Moot	Points estimated from the map in the paper	GoogleEarth	25	28	41	28	58	54	25.4781	28.9817	No	Yes	No	location estimated from the point in the paper		2006	9		None	No	Yes	Yellow sticky trap with trimedflure	0	Abdel-Kawi trap with trimedlure	0	Adult
1	F A	Abdel-Galil	2010	Journal	Yes	Yes	Egypt	New Valley Governorate	Dakhla Oases	Moot	Points estimated from the map in the paper	GoogleEarth	25	28	41	28	58	54	25.4781	28.9817	No	Yes	No	location estimated from the point in the paper		2006	10		None	No	Yes	Yellow sticky trap with trimedflure	0	Abdel-Kawi trap with trimedlure	0	Adult
1	F A	Abdel-Galil	2010	Journal	Yes	Yes	Egypt	New Valley Governorate	Dakhla Oases	Moot	Points estimated from the map in the paper	GoogleEarth	25	28	41	28	58	54	25.4781	28.9817	No	Yes	No	location estimated from the point in the paper		2006	11		None	No	Yes	Yellow sticky trap with trimedflure	0	Abdel-Kawi trap with trimedlure	0	Adult
1	F A	Abdel-Galil	2010	Journal	Yes	Yes	Egypt	New Valley Governorate	Dakhla Oases	Moot	Points estimated from the map in the paper	GoogleEarth	25	28	41	28	58	54	25.4781	28.9817	No	Yes	No	location estimated from the point in the paper		2006	12		None	No	Yes	Yellow sticky trap with trimedflure	0	Abdel-Kawi trap with trimedlure	0	Adult
1	F A	Abdel-Galil	2010	Journal	Yes	Yes	Egypt	New Valley Governorate	Dakhla Oases	Moot	Points estimated from the map in the paper	GoogleEarth	25	28	41	28	58	54	25.4781	28.9817	No	Yes	No	location estimated from the point in the paper		2007	1		None	No	Yes	Yellow sticky trap with trimedflure	0	Abdel-Kawi trap with trimedlure	0	Adult
1	F A	Abdel-Galil	2010	Journal	Yes	Yes	Egypt	New Valley Governorate	Dakhla Oases	Moot	Points estimated from the map in the paper	GoogleEarth	25	28	41	28	58	54	25.4781	28.9817	No	Yes	No	location estimated from the point in the paper		2007	2		None	No	Yes	Yellow sticky trap with trimedflure	0	Abdel-Kawi trap with trimedlure	0	Adult
1	F A	Abdel-Galil	2010	Journal	Yes	Yes	Egypt	New Valley Governorate	Dakhla Oases	Bodkholow	Points estimated from the map in the paper	GoogleEarth	25	28	41	28	58	54	25.4781	28.9817	No	Yes	No	location estimated from the point in the paper		2007	3		None	No	Yes	Yellow sticky trap with trimedflure	0	Abdel-Kawi trap with trimedlure	0	Adult
1	F A	Abdel-Galil	2010	Journal	Yes	Yes	Egypt	New Valley Governorate	Dakhla Oases	Bodkholow	Points estimated from the map in the paper	GoogleEarth	25	32	20	28	58	8	25.5389	28.9689	No	Yes	No	location estimated from the point in the paper		2005	4		Low	Yes	Yes	Yellow sticky trap with trimedflure	0.83	Abdel-Kawi trap with trimedlure	1.4	Adult
1	F A	Abdel-Galil	2010	Journal	Yes	Yes	Egypt	New Valley Governorate	Dakhla Oases	Bodkholow	Points estimated from the map in the paper	GoogleEarth	25	32	20	28	58	8	25.5389	28.9689	No	Yes	No	location estimated from the point in the paper		2005	5		High	Yes	Yes	Yellow sticky trap with trimedflure	2.42	Abdel-Kawi trap with trimedlure	3.84	Adult
1	F A	Abdel-Galil	2010	Journal	Yes	Yes	Egypt	New Valley Governorate	Dakhla Oases	Bodkholow	Points estimated from the map in the paper	GoogleEarth	25	32	20	28	58	8	25.5389	28.9689	No	Yes	No	location estimated from the point in the paper		2005	6		Peak	Yes	Yes	Yellow sticky trap with trimedflure	18.01	Abdel-Kawi trap with trimedlure	24.59	Adult
1	F A	Abdel-Galil	2010	Journal	Yes	Yes	Egypt	New Valley Governorate	Dakhla Oases	Bodkholow	Points estimated from the map in the paper	GoogleEarth	25	32	20	28	58	8	25.5389	28.9689	No	Yes	No	location estimated from the point in the paper		2005	7		High	Yes	Yes	Yellow sticky trap with trimedflure	8.87	Abdel-Kawi trap with trimedlure	11.93	Adult
1	F A	Abdel-Galil	2010	Journal	Yes	Yes	Egypt	New Valley Governorate	Dakhla Oases	Bodkholow	Points estimated from the map in the paper	GoogleEarth	25	32	20	28	58	8	25.5389	28.9689	No	Yes	No	location estimated from the point in the paper		2005	8		High	Yes	Yes	Yellow sticky trap with trimedflure	4.58	Abdel-Kawi trap with trimedlure	7.75	Adult
1	F A	Abdel-Galil	2010	Journal	Yes	Yes	Egypt	New Valley Governorate	Dakhla Oases	Bodkholow	Points estimated from the map in the paper	GoogleEarth	25	32	20	28	58	8	25.5389	28.9689	No	Yes	No	location estimated from the point in the paper		2005	9		Peak	Yes	Yes	Yellow sticky trap with trimedflure	14.84	Abdel-Kawi trap with trimedlure	26.59	Adult
1	F A	Abdel-Galil	2010	Journal	Yes	Yes	Egypt	New Valley Governorate	Dakhla Oases	Bodkholow	Points estimated from the map in the paper	GoogleEarth	25	32	20	28	58	8	25.5389	28.9689	No	Yes	No	location estimated from the point in the paper		2005	10		High	Yes	Yes	Yellow sticky trap with trimedflure	7.93	Abdel-Kawi trap with trimedlure	16.93	Adult
1	F A	Abdel-Galil	2010	Journal	Yes	Yes	Egypt	New Valley Governorate	Dakhla Oases	Bodkholow	Points estimated from the map in the paper	GoogleEarth	25	32	20	28	58	8	25.5389	28.9689	No	Yes	No	location estimated from the point in the paper		2005	11		High	Yes	Yes	Yellow sticky trap with trimedflure	1.25	Abdel-Kawi trap with trimedlure	2.53	Adult
1	F A	Abdel-Galil	2010	Journal	Yes	Yes	Egypt	New Valley Governorate	Dakhla Oases	Bodkholow	Points estimated from the map in the paper	GoogleEarth	25	32	20	28	58	8	25.5389	28.9689	No	Yes	No	location estimated from the point in the paper		2005	12		Low	Yes	Yes	Yellow sticky trap with trimedflure	0.93	Abdel-Kawi trap with trimedlure	2	Adult
1	F A	Abdel-Galil	2010	Journal	Yes	Yes	Egypt	New Valley Governorate	Dakhla Oases	Bodkholow	Points estimated from the map in the paper	GoogleEarth	25	32	20	28	58	8	25.5389	28.9689	No	Yes	No	location estimated from the point in the paper		2006	1		Low	Yes	Yes	Yellow sticky trap with trimedflure	0.76	Abdel-Kawi trap with trimedlure	1.35	Adult
1	F A	Abdel-Galil	2010	Journal	Yes	Yes	Egypt	New Valley Governorate	Dakhla Oases	Bodkholow	Points estimated from the map in the paper	GoogleEarth	25	32	20	28	58	8	25.5389	28.9689	No	Yes	No	location estimated from the point in the paper		2006	2		Low	Yes	Yes	Yellow sticky trap with trimedflure	0.5	Abdel-Kawi trap with trimedlure	0.58	Adult
1	F A	Abdel-Galil	2010	Journal	Yes	Yes	Egypt	New Valley Governorate	Dakhla Oases	Bodkholow	Points estimated from the map in the paper	GoogleEarth	25	32	20	28	58	8	25.5389	28.9689	No	Yes	No	location estimated from the point in the paper		2006	3		Marginal	Yes	Yes	Yellow sticky trap with trimedflure	0.08	Abdel-Kawi trap with trimedlure	0.08	Adult
1	F A	Abdel-Galil	2010	Journal	Yes	Yes	Egypt	New Valley Governorate	Dakhla Oases	Bodkholow	Points estimated from the map in the paper	GoogleEarth	25	32	20	28	58	8	25.5389	28.9689	No	Yes	No	location estimated from the point in the paper		2006	4		None	No	Yes	Yellow sticky trap with trimedflure	0	Abdel-Kawi trap with trimedlure	0	Adult
1	F A	Abdel-Galil	2010	Journal	Yes	Yes	Egypt	New Valley Governorate	Dakhla Oases	Bodkholow	Points estimated from the map in the paper	GoogleEarth	25	32	20	28	58	8	25.5389	28.9689	No	Yes	No	location estimated from the point in the paper		2006	5		None	No	Yes	Yellow sticky trap with trimedflure	0	Abdel-Kawi trap with trimedlure	0	Adult
1	F A	Abdel-Galil	2010	Journal	Yes	Yes	Egypt	New Valley Governorate	Dakhla Oases	Bodkholow	Points estimated from the map in the paper	GoogleEarth	25	32	20	28	58	8	25.5389	28.9689	No	Yes	No	location estimated from the point in the paper		2006	6		None	No	Yes	Yellow sticky trap with trimedflure	0	Abdel-Kawi trap with trimedlure	0	Adult
1	F A	Abdel-Galil	2010	Journal	Yes	Yes	Egypt	New Valley Governorate	Dakhla Oases	Bodkholow	Points estimated from the map in the paper	GoogleEarth	25	32	20	28	58	8	25.5389	28.9689	No	Yes	No	location estimated from the point in the paper		2006	7		None	No	Yes	Yellow sticky trap with trimedflure	0	Abdel-Kawi trap with trimedlure	0	Adult
1	F A	Abdel-Galil	2010	Journal	Yes	Yes	Egypt	New Valley Governorate	Dakhla Oases	Bodkholow	Points estimated from the map in the paper	GoogleEarth	25	32	20	28	58	8	25.5389	28.9689	No	Yes	No	location estimated from the point in the paper		2006	8		None	No	Yes	Yellow sticky trap with trimedflure	0	Abdel-Kawi trap with trimedlure	0	Adult
1	F A	Abdel-Galil	2010	Journal	Yes	Yes	Egypt	New Valley Governorate	Dakhla Oases	Bodkholow	Points estimated from the map in the paper	GoogleEarth	25	32	20	28	58	8	25.5389	28.9689	No	Yes	No	location estimated from the point in the paper		2006	9		None	No	Yes	Yellow sticky trap with trimedflure	0	Abdel-Kawi trap with trimedlure	0	Adult
1	F A	Abdel-Galil	2010	Journal	Yes	Yes	Egypt	New Valley Governorate	Dakhla Oases	Bodkholow	Points estimated from the map in the paper	GoogleEarth	25	32	20	28	58	8	25.5389	28.9689	No	Yes	No	location estimated from the point in the paper		2006	10		None	No	Yes	Yellow sticky trap with trimedflure	0	Abdel-Kawi trap with trimedlure	0	Adult
1	F A	Abdel-Galil	2010	Journal	Yes	Yes	Egypt	New Valley Governorate	Dakhla Oases	Bodkholow	Points estimated from the map in the paper	GoogleEarth	25	32	20	28	58	8	25.5389	28.9689	No	Yes	No	location estimated from the point in the paper		2006	11		None	No	Yes	Yellow sticky trap with trimedflure	0	Abdel-Kawi trap with trimedlure	0	Adult
1	F A	Abdel-Galil	2010	Journal	Yes	Yes	Egypt	New Valley Governorate	Dakhla Oases	Bodkholow	Points estimated from the map in the paper	GoogleEarth	25	32	20	28	58	8	25.5389	28.9689	No	Yes	No	location estimated from the point in the paper		2006	12		None	No	Yes	Yellow sticky trap with trimedflure	0	Abdel-Kawi trap with trimedlure	0	Adult
1	F A	Abdel-Galil	2010	Journal	Yes	Yes	Egypt	New Valley Governorate	Dakhla Oases	Bodkholow	Points estimated from the map in the paper	GoogleEarth	25	32	20	28	58	8	25.5389	28.9689	No	Yes	No	location estimated from the point in the paper		2007	1		None	No	Yes	Yellow sticky trap with trimedflure	0	Abdel-Kawi trap with trimedlure	0	Adult
1	F A	Abdel-Galil	2010	Journal	Yes	Yes	Egypt	New Valley Governorate	Dakhla Oases	Bodkholow	Points estimated from the map in the paper	GoogleEarth	25	32	20	28	58	8	25.5389	28.9689	No	Yes	No	location estimated from the point in the paper		2007	2		None	No	Yes	Yellow sticky trap with trimedflure	0	Abdel-Kawi trap with trimedlure	0	Adult
1	F A	Abdel-Galil	2010	Journal	Yes	Yes	Egypt	New Valley Governorate	Dakhla Oases	Bodkholow	Points estimated from the map in the paper	GoogleEarth	25	32	20	28	58	8	25.5389	28.9689	No	Yes	No	location estimated from the point in the paper		2007	3		None	No	Yes	Yellow sticky trap with trimedflure	0	Abdel-Kawi trap with trimedlure	0	Adult
38	M	De Meyer	2008	Online	Yes	Yes	Algeria			Algiers		Source							36.76	3.05	Yes	No	No	Fimiani (1989)	P					Yes	No
38	M	De Meyer	2008	Online	Yes	Yes	Algeria			Mitidja		Source							36.6	3	No	Yes	No	Fimiani (1989)	P					Yes	No
38	M	De Meyer	2008	Online	Yes	Yes	Argentina			Arocena		Source							-32.08	-60.97	No	Yes	No	Segura et al. (2002)	P					Yes	No
38	M	De Meyer	2008	Online	Yes	Yes	Argentina			Bella Vista		Source							-28.52	-59.05	No	Yes	No	Segura et al. (2002)	P					Yes	No
38	M	De Meyer	2008	Online	Yes	Yes	Argentina			Campo Santo		Source							-24.7	-65.08	No	Yes	No	Segura et al. (2002)	P					Yes	No
38	M	De Meyer	2008	Online	Yes	Yes	Argentina			Capayn		Source							-28.77	-66.07	No	Yes	No	Segura et al. (2002)	P					Yes	No
38	M	De Meyer	2008	Online	Yes	Yes	Argentina			Cerro Azu		Source							-27.63	-55.48	No	Yes	No	Vera et al. (2002)	P					Yes	No
38	M	De Meyer	2008	Online	Yes	Yes	Argentina			Chajari		Source							-30.77	-57.98	No	Yes	No	Segura et al. (2002)	P					Yes	No
38	M	De Meyer	2008	Online	Yes	Yes	Argentina			Chilecito		Source							-29.17	-67.5	No	Yes	No	Segura et al. (2002)	P					Yes	No
38	M	De Meyer	2008	Online	Yes	Yes	Argentina			Chumbicha		Source							-28.87	-66.23	No	Yes	No	Segura et al. (2002)	P					Yes	No
38	M	De Meyer	2008	Online	Yes	Yes	Argentina			Colonia Santa Rosa		Source							-23.45	-64.36	No	Yes	No	Segura et al. (2002)	P					Yes	No
38	M	De Meyer	2008	Online	Yes	Yes	Argentina			Concordia		Source							-31.38	-58.02	No	Yes	No	Segura et al. (2002)	P					Yes	No
38	M	De Meyer	2008	Online	Yes	Yes	Argentina			de Julio		Source							-28.83	-58.83	No	Yes	No	Segura et al. (2002)	P					Yes	No
38	M	De Meyer	2008	Online	Yes	Yes	Argentina			Doyle		Source							-33.46	-60.1	No	Yes	No	Segura et al. (2002)	P					Yes	No
38	M	De Meyer	2008	Online	Yes	Yes	Argentina			Embarcacion		Source							-23.22	-64.1	No	Yes	No	Segura et al. (2002)	P					Yes	No
38	M	De Meyer	2008	Online	Yes	Yes	Argentina			Famailla		Source							-27.02	-65.25	No	Yes	No	Segura et al. (2002)	P					Yes	No
38	M	De Meyer	2008	Online	Yes	Yes	Argentina			Gob. Castro		Source							-33.76	-59.88	No	Yes	No	Segura et al. (2002)	P					Yes	No
38	M	De Meyer	2008	Online	Yes	Yes	Argentina			Guandacol		Source							-29.56	-68.56	No	Yes	No	Segura et al. (2002)	P					Yes	No
38	M	De Meyer	2008	Online	Yes	Yes	Argentina			Horco Molle		Source							-26.91	-65.08	No	Yes	No	Segura et al. (2002)	P					Yes	No
38	M	De Meyer	2008	Online	Yes	Yes	Argentina			Humaita		Source							-31.78	-58.3	No	Yes	No	Segura et al. (2002)	P					Yes	No
38	M	De Meyer	2008	Online	Yes	Yes	Argentina			La Criolla		Source							-31.15	-58.06	No	Yes	No	Segura et al. (2002)	P					Yes	No
38	M	De Meyer	2008	Online	Yes	Yes	Argentina			Ledesma		Source							-23.83	-64.77	No	Yes	No	Segura et al. (2002)	P					Yes	No
38	M	De Meyer	2008	Online	Yes	Yes	Argentina			Los Dorados		Source							-29.35	-67.47	No	Yes	No	Segura et al. (2002)	P					Yes	No
38	M	De Meyer	2008	Online	Yes	Yes	Argentina			Los Sarmientos		Source							-29.15	-67.52	No	Yes	No	Segura et al. (2002)	P					Yes	No
38	M	De Meyer	2008	Online	Yes	Yes	Argentina			Lujn		Source							-32.37	-65.95	No	Yes	No	Segura et al. (2002)	P					Yes	No
38	M	De Meyer	2008	Online	Yes	Yes	Argentina			Lules		Source							-26.93	-65.35	No	Yes	No	Segura et al. (2002)	P					Yes	No
38	M	De Meyer	2008	Online	Yes	Yes	Argentina			Mercedes		Source							-34.65	-59.43	No	Yes	No	Segura et al. (2002)	P					Yes	No
38	M	De Meyer	2008	Online	Yes	Yes	Argentina			Metan		Source							-25.48	-64.95	No	Yes	No	Segura et al. (2002)	P					Yes	No
38	M	De Meyer	2008	Online	Yes	Yes	Argentina			Monje		Source							-32.38	-60.93	No	Yes	No	Segura et al. (2002)	P					Yes	No
38	M	De Meyer	2008	Online	Yes	Yes	Argentina			Monte Caseros		Source							-30.28	-57.63	No	Yes	No	Segura et al. (2002)	P					Yes	No
38	M	De Meyer	2008	Online	Yes	Yes	Argentina			Montecarlo		Source							-26.57	-54.78	No	Yes	No	Segura et al. (2002)	P					Yes	No
38	M	De Meyer	2008	Online	Yes	Yes	Argentina			Oran		Source							-23.13	-64.33	No	Yes	No	Segura et al. (2002)	P					Yes	No
38	M	De Meyer	2008	Online	Yes	Yes	Argentina			Palmar		Source							-32.16	-58.28	No	Yes	No	Segura et al. (2002)	P					Yes	No
38	M	De Meyer	2008	Online	Yes	Yes	Argentina			Perico		Source							-24.38	-65.1	No	Yes	No	Segura et al. (2002)	P					Yes	No
38	M	De Meyer	2008	Online	Yes	Yes	Argentina			Pichanal		Source							-23.33	-64.23	No	Yes	No	Segura et al. (2002)	P					Yes	No
38	M	De Meyer	2008	Online	Yes	Yes	Argentina			Pilar		Source							-34.45	-58.9	No	Yes	No	Segura et al. (2002)	P					Yes	No
38	M	De Meyer	2008	Online	Yes	Yes	Argentina			Posadas		Source							-27.38	-55.88	No	Yes	No	Segura et al. (2002)	P					Yes	No
38	M	De Meyer	2008	Online	Yes	Yes	Argentina			Pto Yerua		Source							-31.53	-58.03	No	Yes	No	Segura et al. (2002)	P					Yes	No
38	M	De Meyer	2008	Online	Yes	Yes	Argentina			Quines		Source							-32.23	-65.8	No	Yes	No	Segura et al. (2002)	P					Yes	No
38	M	De Meyer	2008	Online	Yes	Yes	Argentina			Reconquista		Source							-29.11	-59.42	No	Yes	No	Segura et al. (2002)	P					Yes	No
38	M	De Meyer	2008	Online	Yes	Yes	Argentina			Rivadavia		Source							-24.13	-62.9	No	Yes	No	Vera et al. (2002)	P					Yes	No
38	M	De Meyer	2008	Online	Yes	Yes	Argentina			Saenz Pena		Source							-26.8	-60.45	No	Yes	No	Segura et al. (2002)	P					Yes	No
38	M	De Meyer	2008	Online	Yes	Yes	Argentina			San Isidro		Source							-28.45	-65.76	No	Yes	No	Segura et al. (2002)	P					Yes	No
38	M	De Meyer	2008	Online	Yes	Yes	Argentina			San José		Source							-26.78	-66.06	No	Yes	No	Segura et al. (2002)	P					Yes	No
38	M	De Meyer	2008	Online	Yes	Yes	Argentina			San Pedro		Source							-33.66	-59.72	No	Yes	No	Segura et al. (2002)	P					Yes	No
38	M	De Meyer	2008	Online	Yes	Yes	Argentina			Santa Rosa		Source							-28.45	-65.71	No	Yes	No	Segura et al. (2002)	P					Yes	No
38	M	De Meyer	2008	Online	Yes	Yes	Argentina			S.F. Valle de Catamarca		Source							-28.5	-65.78	No	Yes	No	Segura et al. (2002)	P					Yes	No
38	M	De Meyer	2008	Online	Yes	Yes	Argentina			Sombrerito		Source							-27.7	-58.7	No	Yes	No	Segura et al. (2002)	P					Yes	No
38	M	De Meyer	2008	Online	Yes	Yes	Argentina			Sumalao		Source							-28.45	-65.62	No	Yes	No	Segura et al. (2002)	P					Yes	No
38	M	De Meyer	2008	Online	Yes	Yes	Argentina			Tafi Viejo		Source							-26.75	-65.33	No	Yes	No	Segura et al. (2002)	P					Yes	No
38	M	De Meyer	2008	Online	Yes	Yes	Argentina			Taficillo		Source							-26.73	-65.27	No	Yes	No	Segura et al. (2002)	P					Yes	No
38	M	De Meyer	2008	Online	Yes	Yes	Argentina			Taruma		Source							-26.7	-54.66	No	Yes	No	Segura et al. (2002)	P					Yes	No
38	M	De Meyer	2008	Online	Yes	Yes	Argentina			Timbo		Source							-26.7	-65.13	No	Yes	No	Segura et al. (2002)	P					Yes	No
38	M	De Meyer	2008	Online	Yes	Yes	Argentina			Villa Adela		Source							31.1	-58.2	No	Yes	No	Segura et al. (2002)	P					Yes	No
38	M	De Meyer	2008	Online	Yes	Yes	Argentina			Villa Adelina		Source							-34.53	-58.55	No	Yes	No	Segura et al. (2002)	P					Yes	No
38	M	De Meyer	2008	Online	Yes	Yes	Argentina			Villa Dolores		Source							-28.43	-65.73	No	Yes	No	Segura et al. (2002)	P					Yes	No
38	M	De Meyer	2008	Online	Yes	Yes	Argentina			Villa Zorraquin		Source							-31.32	-58.05	No	Yes	No	Segura et al. (2002)	P					Yes	No
38	M	De Meyer	2008	Online	Yes	Yes	Argentina			Virasoro		Source							-28.5	-56.17	No	Yes	No	Segura et al. (2002)	P					Yes	No
38	M	De Meyer	2008	Online	Yes	Yes	Argentina			Yuto		Source							-23.63	-64.47	No	Yes	No	Segura et al. (2002)	P					Yes	No
38	M	De Meyer	2008	Online	Yes	Yes	Brazil			Aracati		Source							-4.57	-37.77	No	Yes	No	Braga Sobrinho et al. (2002)	P					Yes	No
38	M	De Meyer	2008	Online	Yes	Yes	Brazil			Icapui		Source							-4.71	-37.35	No	Yes	No	Braga Sobrinho et al. (2002)	P					Yes	No
38	M	De Meyer	2008	Online	Yes	Yes	Brazil			Itaiçaba		Source							-4.77	-37.85	No	Yes	No	Braga Sobrinho et al. (2002)	P					Yes	No
38	M	De Meyer	2008	Online	Yes	Yes	Brazil			Jaguaruana		Source							-4.83	-37.78	No	Yes	No	Braga Sobrinho et al. (2002)	P					Yes	No
38	M	De Meyer	2008	Online	Yes	Yes	Brazil			Limoeiro do Norte		Source							-5.13	-38.08	No	Yes	No	Braga Sobrinho et al. (2002)	P					Yes	No
38	M	De Meyer	2008	Online	Yes	Yes	Brazil			Quixeré		Source							-5.08	-37.98	No	Yes	No	Braga Sobrinho et al. (2002)	P					Yes	No
38	M	De Meyer	2008	Online	Yes	Yes	Brazil			Sao Paulo		Source							-23.67	-45.33	No	Yes	No	Pires et al. (2002)	P					Yes	No
38	M	De Meyer	2008	Online	Yes	Yes	Brazil			Itaguai		Source							-22.77	-43.68	No	Yes	No	Aguiar & Menezes (1996)	P					Yes	No
38	M	De Meyer	2008	Online	Yes	Yes	Croatia			Dubrovnik		Source							42.65	18.09	No	Yes	No	Bjelis & Pelicaric (2002)	P					Yes	No
38	M	De Meyer	2008	Online	Yes	Yes	Croatia			Istria		Source							45	14	No	Yes	No	Bjelis & Pelicaric (2002)	H					Yes	No
38	M	De Meyer	2008	Online	Yes	Yes	Croatia			Neretva valley		Source							43.03	17.45	No	Yes	No	Bjelis & Pelicaric (2002)	P					Yes	No
38	M	De Meyer	2008	Online	Yes	Yes	Croatia			Split		Source							43.51	16.46	No	Yes	No	Bjelis & Pelicaric (2002)	P					Yes	No
38	M	De Meyer	2008	Online	Yes	Yes	Cyprus			Cyprus		Source							35	33	No	Yes	No	Fimiani (1989)	P					Yes	No
38	M	De Meyer	2008	Online	Yes	Yes	France			Antony		Source							48.75	2.3	No	Yes	No	Balachowsky (1934)	T					Yes	No
38	M	De Meyer	2008	Online	Yes	Yes	France			Bordeaux		Source							48.68	1.1	No	Yes	No	Fimiani (1989)	T					Yes	No
38	M	De Meyer	2008	Online	Yes	Yes	France			Lyon		Source							45.75	4.85	No	Yes	No	Fimiani (1989)	T					Yes	No
38	M	De Meyer	2008	Online	Yes	Yes	France			Orsay		Source							48.7	2.18	No	Yes	No	Balachowsky (1934)	T					Yes	No
38	M	De Meyer	2008	Online	Yes	Yes	France			Versailles		Source							48.8	2.13	No	Yes	No	Balachowsky (1934)	T					Yes	No
38	M	De Meyer	2008	Online	Yes	Yes	France			Provence		Source							44	6	No	Yes	No	Fimiani (1989)	P					Yes	No
38	M	De Meyer	2008	Online	Yes	Yes	Greece			Attiki		Source							38	23.73	No	Yes	No	Fimiani (1989)	P					Yes	No
38	M	De Meyer	2008	Online	Yes	Yes	Greece			Chios Island		Source							38.42	26	No	Yes	No	Katsoyannos et al. (2002)	T					Yes	No
38	M	De Meyer	2008	Online	Yes	Yes	Greece			Heraklion area		Source							35.17	25.17	No	Yes	No	Reboulakis et al. (2002)	P					Yes	No
38	M	De Meyer	2008	Online	Yes	Yes	Greece			Thessaloniki		Source							40.64	22.94	No	Yes	No	Papadopoulos & Katsoyannos (2002)	T					Yes	No
38	M	De Meyer	2008	Online	Yes	Yes	Greece			Kalamata		Source							37.04	22.11	No	Yes	No	Kourti et al. (1992)	P					Yes	No
38	M	De Meyer	2008	Online	Yes	Yes	Guatemala			Retalhuleu		Source							14.53	-91.68	No	Yes	No	Hunt et al. (2004)	P					Yes	No
38	M	De Meyer	2008	Online	Yes	Yes	Iran			Mazandaran		Source							36	52	No	Yes	No	Fischer-Colbrie & Busch-Petersen (1989)	P					Yes	No
38	M	De Meyer	2008	Online	Yes	Yes	Israel			Hedera		Source							32.44	34.92	No	Yes	No	Nestel et al. (2002)	P					Yes	No
38	M	De Meyer	2008	Online	Yes	Yes	Israel			Kibbutz Zova		Source							31.78	35.12	No	Yes	No	Israely et al. (2004)	P					Yes	No
38	M	De Meyer	2008	Online	Yes	Yes	Israel			Mesilat-Zion		Source							31.8	35.02	No	Yes	No	Israely et al. (2004)	P					Yes	No
38	M	De Meyer	2008	Online	Yes	Yes	Israel			Rehovot		Source							31.9	34.82	No	Yes	No	Yuval et al. (1998)	P					Yes	No
38	M	De Meyer	2008	Online	Yes	Yes	Israel			Jordan Valley		Source							32.5	35.5	No	Yes	No	Cayol et al. (2002)	P					Yes	No
38	M	De Meyer	2008	Online	Yes	Yes	Italy			Bari		Source							41.13	16.85	No	Yes	No	Callejas & Ochando (2002)	P					Yes	No
38	M	De Meyer	2008	Online	Yes	Yes	Italy			Bologna		Source							44.48	11.33	No	Yes	No	Fimiani (1989)	P					Yes	No
38	M	De Meyer	2008	Online	Yes	Yes	Italy			Calabria		Source							39	16.5	No	Yes	No	Fimiani (1989)	P					Yes	No
38	M	De Meyer	2008	Online	Yes	Yes	Italy			Naples		Source							40.83	14.25	No	Yes	No	Fimiani (1989)	P					Yes	No
38	M	De Meyer	2008	Online	Yes	Yes	Italy			Roma		Source							41.9	12.48	No	Yes	No	Fimiani (1989)	P					Yes	No
38	M	De Meyer	2008	Online	Yes	Yes	Italy			Sardinia		Source							40	9	No	Yes	No	Fimiani (1989)	P					Yes	No
38	M	De Meyer	2008	Online	Yes	Yes	Italy			Sicily		Source							37.5	14	No	Yes	No	Fimiani (1989)	P					Yes	No
38	M	De Meyer	2008	Online	Yes	Yes	Italy			Po Valley		Source							44.97	12.05	No	Yes	No	Fimiani (1989)	P					Yes	No
38	M	De Meyer	2008	Online	Yes	Yes	Jordan			Aqaba city		Source							29.53	35.01	No	Yes	No	Cayol et al. (2002)	P					Yes	No
38	M	De Meyer	2008	Online	Yes	Yes	Jordan			Araba Valley		Source							30.4	35.17	No	Yes	No	Cayol et al. (2002)	P					Yes	No
38	M	De Meyer	2008	Online	Yes	Yes	Libya			Sorman		Source							32.76	12.58	No	Yes	No	Fimiani (1989)	P					Yes	No
38	M	De Meyer	2008	Online	Yes	Yes	Libya			Tagiura		Source							32.88	13.35	No	Yes	No	Fimiani (1989)	P					Yes	No
38	M	De Meyer	2008	Online	Yes	Yes	Portugal			Madeira Island		Source							32.73	-17	No	Yes	No	Dantas et al. (2002)	P					Yes	No
38	M	De Meyer	2008	Online	Yes	Yes	Portugal			Silves		Source							37.18	-8.43	No	Yes	No	Larcher-Carvalho & Mumford (2002)	P					Yes	No
38	M	De Meyer	2008	Online	Yes	Yes	Portugal			Tavira		Source							37.12	-7.65	No	Yes	No	Larcher-Carvalho & Mumford (2002)	P					Yes	No
38	M	De Meyer	2008	Online	Yes	Yes	PTUJPA			Gaza		Source							31.5	34.47	No	Yes	No	Cayol et al. (2002)	P					Yes	No
38	M	De Meyer	2008	Online	Yes	Yes	S-Arabia			Taif		Source							21.27	40.42	No	Yes	No	Fischer-Colbrie & Busch-Petersen (1989)	P					Yes	No
38	M	De Meyer	2008	Online	Yes	Yes	Spain			Andalusia		Source							37.6	-4.5	No	Yes	No	Fimiani (1989)	P					Yes	No
38	M	De Meyer	2008	Online	Yes	Yes	Spain			Atajate		Source							36.63	-5.23	No	Yes	No	Reyes & Ochando (1998)	P					Yes	No
38	M	De Meyer	2008	Online	Yes	Yes	Spain			Campo Arcis		Source							39.43	-1.17	No	Yes	No	Reyes & Ochando (1998)	P					Yes	No
38	M	De Meyer	2008	Online	Yes	Yes	Spain			Madrid		Source							40.5	-3.67	No	Yes	No	Reyes & Ochando (1998)	P					Yes	No
38	M	De Meyer	2008	Online	Yes	Yes	Spain			Malaga		Source							36.72	-4.42	No	Yes	No	Fimiani (1989)	P					Yes	No
38	M	De Meyer	2008	Online	Yes	Yes	Spain			Motril		Source							36.75	-3.52	No	Yes	No	Ros et al. (2000)	P					Yes	No
38	M	De Meyer	2008	Online	Yes	Yes	Spain			Sevilla		Source							37.38	-5.99	No	Yes	No	Fimiani (1989)	P					Yes	No
38	M	De Meyer	2008	Online	Yes	Yes	Turkey			Ismir		Source							38.41	27.15	No	Yes	No	Fimiani (1989)	P					Yes	No
38	M	De Meyer	2008	Online	Yes	Yes	Ukraine			Odessa		Source							46.47	30.73	No	Yes	No	Fischer-Colbrie & Busch-Petersen (1989)	T					Yes	No
38	M	De Meyer	2008	Online	Yes	Yes	Ukraine			Sebastopol		Source							44.6	33.53	No	Yes	No	Fischer-Colbrie & Busch-Petersen (1989)	T					Yes	No
38	M	De Meyer	2008	Online	Yes	Yes	USA			Florida		Source									No	Yes	No	http://www.fsca.entomology.museum/Diptera/DipteraFrame.htm	T					Yes	No
38	M	De Meyer	2008	Online	Yes	Yes	USA			California		Source									No	Yes	No	http://www.sel.barc.usda.gov:591/diptera/Tephritidae/TephSpecimens/search.html	T					Yes	No
38	M	De Meyer	2008	Online	Yes	Yes	USA			Texas		Source									No	Yes	No	http://www.sel.barc.usda.gov:591/diptera/Tephritidae/TephSpecimens/search.html	T					Yes	No
38	M	De Meyer	2008	Online	Yes	Yes	Yemen			ar-rujum		Source							15.46	43.64	No	Yes	No	Merz et al. (2006)	P					Yes	No
38	M	De Meyer	2008	Online	Yes	Yes	Yemen			Sana'a		Source							15.35	44.21	No	Yes	No	Merz et al. (2006)	P					Yes	No
133	D F	Segura	2006	Journal	Yes	Yes	Argentina	Buenos Aires		Mercedes		GoogleEarth	-34	39	13	-59	25	40	-34.6536	-59.4278	No	Yes	No							Yes	No
133	D F	Segura	2006	Journal	Yes	Yes	Argentina	Buenos Aires		Pilar		GoogleEarth	-34	27	21	-58	54	40	-34.4558	-58.9111	No	Yes	No							Yes	No
133	D F	Segura	2006	Journal	Yes	Yes	Argentina	Buenos Aires		Gob. Castro Doyle		GoogleEarth	-34	37	41	-58	25	13	-34.6281	-58.4203	No	Yes	No							Yes	No
133	D F	Segura	2006	Journal	Yes	Yes	Argentina	Buenos Aires		Doyle		GoogleEarth	-33	54	8	-59	49	17	-33.9022	-59.8214	No	Yes	No							Yes	No
133	D F	Segura	2006	Journal	Yes	Yes	Argentina	Buenos Aires		San Pedro		GoogleEarth	-33	40	58	-59	40	21	-33.6828	-59.6725	No	Yes	No							Yes	No
133	D F	Segura	2006	Journal	Yes	Yes	Argentina	Buenos Aires		Villa Adelina		GoogleEarth	-34	30	50	-58	32	40	-34.5139	-58.5444	No	Yes	No							Yes	No
133	D F	Segura	2006	Journal	Yes	Yes	Argentina	Buenos Aires		Ituzaingo		GoogleEarth	-34	39	26	-58	40	30	-34.6572	-58.675	No	Yes	No							Yes	No
133	D F	Segura	2006	Journal	Yes	Yes	Argentina	Catamarca		S. F. V. Catamarca		GoogleEarth	-28	28	35	-65	46	24	-28.4764	-65.7733	No	Yes	No							Yes	No
133	D F	Segura	2006	Journal	Yes	Yes	Argentina	Catamarca		Capayan		GoogleEarth	-28	44	35	-65	56	31	-28.7431	-65.9419	No	Yes	No							Yes	No
133	D F	Segura	2006	Journal	Yes	Yes	Argentina	Catamarca		Chumbicha		GoogleEarth	-28	51	20	-66	14	28	-28.8556	-66.2411	No	Yes	No							Yes	No
133	D F	Segura	2006	Journal	Yes	Yes	Argentina	Catamarca		San Jose		GoogleEarth	-28	23	15	-65	42	29	-28.3875	-65.7081	No	Yes	No							Yes	No
133	D F	Segura	2006	Journal	Yes	Yes	Argentina	Catamarca		Sta. Rosa		GoogleEarth	-28	2	14	-67	35	39	-28.0372	-67.5942	No	Yes	No							Yes	No
133	D F	Segura	2006	Journal	Yes	Yes	Argentina	Catamarca		Sumalao		GoogleEarth	-28	26	45	-65	46	37	-28.4458	-65.7769	No	Yes	No							Yes	No
133	D F	Segura	2006	Journal	Yes	Yes	Argentina	Catamarca		San Isidro		GoogleEarth	-28	28	14	-65	41	47	-28.4706	-65.6964	No	Yes	No							Yes	No
133	D F	Segura	2006	Journal	Yes	Yes	Argentina	Catamarca		Villa Dolores		GoogleEarth	-28	28	23	-65	48	51	-28.4731	-65.8142	No	Yes	No							Yes	No
133	D F	Segura	2006	Journal	Yes	Yes	Argentina	Corrientes		9 de Julio		GoogleEarth	-28	50	27	-58	49	33	-28.8408	-58.8258	No	Yes	No							Yes	No
133	D F	Segura	2006	Journal	Yes	Yes	Argentina	Corrientes		Bella Vista		GoogleEarth	-28	30	59	-59	1	10	-28.5164	-59.0194	No	Yes	No							Yes	No
133	D F	Segura	2006	Journal	Yes	Yes	Argentina	Corrientes		Ituzaingo		GoogleEarth	-27	34	2	-56	43	11	-27.5672	-56.7197	No	Yes	No							Yes	No
133	D F	Segura	2006	Journal	Yes	Yes	Argentina	Corrientes		Monte Caseros		GoogleEarth	-30	14	56	-57	37	37	-30.2489	-57.6269	No	Yes	No							Yes	No
133	D F	Segura	2006	Journal	Yes	Yes	Argentina	Corrientes		Sombrerito		GoogleEarth	-27	40	22	-58	44	15	-27.6728	-58.7375	No	Yes	No							Yes	No
133	D F	Segura	2006	Journal	Yes	Yes	Argentina	Corrientes		Virasoro		GoogleEarth	-27	28	14	-58	50	30	-27.4706	-58.8417	No	Yes	No							Yes	No
133	D F	Segura	2006	Journal	Yes	Yes	Argentina	Chaco		Saenz Pena		GoogleEarth	-26	47	26	-60	26	24	-26.7906	-60.44	No	Yes	No							Yes	No
133	D F	Segura	2006	Journal	Yes	Yes	Argentina	Entre Rios		Palmar		GoogleEarth	-31	59	15	-58	17	59	-31.9875	-58.2997	No	Yes	No							Yes	No
133	D F	Segura	2006	Journal	Yes	Yes	Argentina	Entre Rios		Concordia		GoogleEarth	-31	23	38	-58	1	6	-31.3939	-58.0183	No	Yes	No							Yes	No
133	D F	Segura	2006	Journal	Yes	Yes	Argentina	Entre Rios		Chajari		GoogleEarth	-30	45	36	-57	58	0	-30.76	-57.9667	No	Yes	No							Yes	No
133	D F	Segura	2006	Journal	Yes	Yes	Argentina	Entre Rios		La Criolla		GoogleEarth	-31	16	31	-58	6	34	-31.2753	-58.1094	No	Yes	No							Yes	No
133	D F	Segura	2006	Journal	Yes	Yes	Argentina	Entre Rios		Puerto Yerua		GoogleEarth	-31	32	39	-58	2	59	-31.5442	-58.0497	No	Yes	No							Yes	No
133	D F	Segura	2006	Journal	Yes	Yes	Argentina	Entre Rios		Villa Zorraquin		GoogleEarth	-31	18	59	-58	2	9	-31.3164	-58.0358	No	Yes	No							Yes	No
133	D F	Segura	2006	Journal	Yes	Yes	Argentina	Entre Rios		Humaita		GoogleEarth	-31	24	0	-58	30	0	-31.4	-58.5	No	Yes	No							Yes	No
133	D F	Segura	2006	Journal	Yes	Yes	Argentina	Entre Rios		Villa Adela		GoogleEarth	-31	10	0	-58	20		-31.1667	-58.3333	No	Yes	No							Yes	No
133	D F	Segura	2006	Journal	Yes	Yes	Argentina	Jujuy		Yuto		GoogleEarth	-23	38	4	-64	27	56	-23.6344	-64.4656	No	Yes	No							Yes	No
133	D F	Segura	2006	Journal	Yes	Yes	Argentina	Jujuy		Ledesma		GoogleEarth	-23	50	0	-64	46	51	-23.8333	-64.7808	No	Yes	No							Yes	No
133	D F	Segura	2006	Journal	Yes	Yes	Argentina	Jujuy		Perico		GoogleEarth	-24	22	37	-65	7	42	-24.3769	-65.1283	No	Yes	No							Yes	No
133	D F	Segura	2006	Journal	Yes	Yes	Argentina	La Rioja		Chilecito		GoogleEarth	-29	10	0	-67	30	0	-29.1667	-67.5	No	Yes	No							Yes	No
133	D F	Segura	2006	Journal	Yes	Yes	Argentina	La Rioja		Los Sarmientos		GoogleEarth	-29	8	51	-67	28	58	-29.1475	-67.4828	No	Yes	No							Yes	No
133	D F	Segura	2006	Journal	Yes	Yes	Argentina	La Rioja		Guandacol		GoogleEarth	-28	59	57	-67	59	13	-28.9992	-67.9869	No	Yes	No							Yes	No
133	D F	Segura	2006	Journal	Yes	Yes	Argentina	Misiones		Caraguatay		GoogleEarth	-26	37	11	-54	46	7	-26.6197	-54.7686	No	Yes	No							Yes	No
133	D F	Segura	2006	Journal	Yes	Yes	Argentina	Misiones		Montecarlo		GoogleEarth	-26	33	50	-54	46	1	-26.5639	-54.7669	No	Yes	No							Yes	No
133	D F	Segura	2006	Journal	Yes	Yes	Argentina	Misiones		El Dorado		GoogleEarth	-26	38	0	-54	66	0	-26.6333	-55.1	No	Yes	No							Yes	No
133	D F	Segura	2006	Journal	Yes	Yes	Argentina	Misiones		Posadas		GoogleEarth	-27	23	18	-55	55	26	-27.3883	-55.9239	No	Yes	No							Yes	No
133	D F	Segura	2006	Journal	Yes	Yes	Argentina	Misiones		Taruma		GoogleEarth	-27	29	4	-55	6	39	-27.4844	-55.1108	No	Yes	No							Yes	No
133	D F	Segura	2006	Journal	Yes	Yes	Argentina	Salta		Campo Santo		GoogleEarth	-24	40	42	-65	6	10	-24.6783	-65.1028	No	Yes	No							Yes	No
133	D F	Segura	2006	Journal	Yes	Yes	Argentina	Salta		Cnia Santa Rosa		GoogleEarth	-23	22	0	-64	30	0	-23.3667	-64.5	No	Yes	No							Yes	No
133	D F	Segura	2006	Journal	Yes	Yes	Argentina	Salta		Embarcacion		GoogleEarth	-23	12	48	-64	5	51	-23.2133	-64.0975	No	Yes	No							Yes	No
133	D F	Segura	2006	Journal	Yes	Yes	Argentina	Salta		Metan		GoogleEarth	-25	29	56	-64	58	5	-25.4989	-64.9681	No	Yes	No							Yes	No
133	D F	Segura	2006	Journal	Yes	Yes	Argentina	Salta		Oran		GoogleEarth	-23	8	7	-64	18	38	-23.1353	-64.3106	No	Yes	No							Yes	No
133	D F	Segura	2006	Journal	Yes	Yes	Argentina	Salta		Pichanal		GoogleEarth	-23	18	55	-64	13	9	-23.3153	-64.2192	No	Yes	No							Yes	No
133	D F	Segura	2006	Journal	Yes	Yes	Argentina	San Luis		Lijan		GoogleEarth	-33	18	40	-66	20	42	-33.3111	-66.345	No	Yes	No							Yes	No
133	D F	Segura	2006	Journal	Yes	Yes	Argentina	San Luis		Merlo		GoogleEarth	-32	20	45	-65	1	46	-32.3458	-65.0294	No	Yes	No							Yes	No
133	D F	Segura	2006	Journal	Yes	Yes	Argentina	San Luis		Quines		GoogleEarth	-32	13	41	-65	48	49	-32.2281	-65.8136	No	Yes	No							Yes	No
133	D F	Segura	2006	Journal	Yes	Yes	Argentina	Santa Fe		Arocena		GoogleEarth	-32	4	37	-60	58	24	-32.0769	-60.9733	No	Yes	No							Yes	No
133	D F	Segura	2006	Journal	Yes	Yes	Argentina	Santa Fe		Reconquista		GoogleEarth	-29	8	37	-59	38	28	-29.1436	-59.6411	No	Yes	No							Yes	No
133	D F	Segura	2006	Journal	Yes	Yes	Argentina	Santa Fe		Monje		GoogleEarth	-32	21	30	-60	56	32	-32.3583	-60.9422	No	Yes	No							Yes	No
133	D F	Segura	2006	Journal	Yes	Yes	Argentina	Tucuman		Famailla		GoogleEarth	-27	3	22	-65	24	8	-27.0561	-65.4022	No	Yes	No							Yes	No
133	D F	Segura	2006	Journal	Yes	Yes	Argentina	Tucuman		Horco-Molle		GoogleEarth	-26	47	13	-65	15	52	-26.7869	-65.2644	No	Yes	No							Yes	No
133	D F	Segura	2006	Journal	Yes	Yes	Argentina	Tucuman		La Rinconada		GoogleEarth	-26	51	0	-65	19	0	-26.85	-65.3167	No	Yes	No							Yes	No
133	D F	Segura	2006	Journal	Yes	Yes	Argentina	Tucuman		Lules		GoogleEarth	-26	55	15	-65	19	45	-26.9208	-65.3292	No	Yes	No							Yes	No
133	D F	Segura	2006	Journal	Yes	Yes	Argentina	Tucuman		San Javier		GoogleEarth	-26	47	3	-65	23	33	-26.7842	-65.3925	No	Yes	No							Yes	No
133	D F	Segura	2006	Journal	Yes	Yes	Argentina	Tucuman		Tafi Viejo		GoogleEarth	-26	43	46	-65	15	0	-26.7294	-65.25	No	Yes	No							Yes	No
133	D F	Segura	2006	Journal	Yes	Yes	Argentina	Tucuman		Taficillo		GoogleEarth	-26	42	0	-65	17	0	-26.7	-65.2833	No	Yes	No							Yes	No
133	D F	Segura	2006	Journal	Yes	Yes	Argentina	Tucuman		Timbo		GoogleEarth	-26	41	31	-65	8	13	-26.6919	-65.1369	No	Yes	No							Yes	No
131	D F	Segura	2004	Journal	Yes	Yes	Argentina	Buenos Aires		San Pedro		Source	-33	40	58	-59	40	21	-33.6828	-59.6725	Yes	No	No			1999	11		Low	Yes	Yes						mandarin	peach	plum
131	D F	Segura	2004	Journal	Yes	Yes	Argentina	Buenos Aires		San Pedro		Source	-33	40	58	-59	40	21	-33.6828	-59.6725	Yes	No	No			1999	12		Low	Yes	Yes						mandarin	peach	plum
131	D F	Segura	2004	Journal	Yes	Yes	Argentina	Buenos Aires		San Pedro		Source	-33	40	58	-59	40	21	-33.6828	-59.6725	Yes	No	No			2000	1		High	Yes	Yes						mandarin	peach	plum
131	D F	Segura	2004	Journal	Yes	Yes	Argentina	Buenos Aires		San Pedro		Source	-33	40	58	-59	40	21	-33.6828	-59.6725	Yes	No	No			2000	2		Peak	Yes	Yes						mandarin	peach	plum
131	D F	Segura	2004	Journal	Yes	Yes	Argentina	Buenos Aires		San Pedro		Source	-33	40	58	-59	40	21	-33.6828	-59.6725	Yes	No	No			2000	3		Peak	Yes	Yes						mandarin	peach	plum
131	D F	Segura	2004	Journal	Yes	Yes	Argentina	Buenos Aires		San Pedro		Source	-33	40	58	-59	40	21	-33.6828	-59.6725	Yes	No	No			2000	4		Low	Yes	Yes						mandarin	peach	plum
131	D F	Segura	2004	Journal	Yes	Yes	Argentina	Buenos Aires		San Pedro		Source	-33	40	58	-59	40	21	-33.6828	-59.6725	Yes	No	No			2000	5		High	Yes	Yes						mandarin	peach	plum
129	P	Schliserman	2004	Journal	Yes	Yes	Argentina	Tucuman		Horco-Molle		Source	-26	47	0	-65	19	0	-26.7833	-65.3167	No	Yes	No			1999	10		Low	Yes	Yes						citrus
129	P	Schliserman	2004	Journal	Yes	Yes	Argentina	Tucuman		Horco-Molle		Source	-26	47	0	-65	19	0	-26.7833	-65.3167	No	Yes	No			1999	11		Low	Yes	Yes						citrus
129	P	Schliserman	2004	Journal	Yes	Yes	Argentina	Tucuman		Horco-Molle		Source	-26	47	0	-65	19	0	-26.7833	-65.3167	No	Yes	No			1999	12		Peak	Yes	Yes						citrus
129	P	Schliserman	2004	Journal	Yes	Yes	Argentina	Tucuman		Horco-Molle		Source	-26	47	0	-65	19	0	-26.7833	-65.3167	No	Yes	No			2000	1		High	Yes	Yes						citrus
129	P	Schliserman	2004	Journal	Yes	Yes	Argentina	Tucuman		Horco-Molle		Source	-26	47	0	-65	19	0	-26.7833	-65.3167	No	Yes	No			2000	2		Low	Yes	Yes						citrus
15	L	Batllori	2008	Journal	Yes	Yes	Spain	Catalonia	Girona	NE of Girona									#DIV/0!	#DIV/0!	No	Yes	No		P	2005	6	22	M	Yes	Yes						peach
15	L	Batllori	2009	Journal	Yes	Yes	Spain	Catalonia	Girona	NE of Girona									#DIV/0!	#DIV/0!	No	Yes	No		P	2005	7		L	Yes	Yes						peach
15	L	Batllori	2010	Journal	Yes	Yes	Spain	Catalonia	Girona	NE of Girona									#DIV/0!	#DIV/0!	No	Yes	No		P	2005	8		L	Yes	Yes						peach
15	L	Batllori	2011	Journal	Yes	Yes	Spain	Catalonia	Girona	NE of Girona									#DIV/0!	#DIV/0!	No	Yes	No		P	2005	9		H	Yes	Yes						peach
15	L	Batllori	2012	Journal	Yes	Yes	Spain	Catalonia	Girona	NE of Girona									#DIV/0!	#DIV/0!	No	Yes	No		P	2005	10		P	Yes	Yes						peach
15	L	Batllori	2013	Journal	Yes	Yes	Spain	Catalonia	Girona	NE of Girona									#DIV/0!	#DIV/0!	No	Yes	No		P	2005	11		H	Yes	Yes						peach
15	L	Batllori	2014	Journal	Yes	Yes	Spain	Catalonia	Girona	NE of Girona									#DIV/0!	#DIV/0!	No	Yes	No		P	2005	12		L	Yes	Yes						peach
15	L	Batllori	2015	Journal	Yes	Yes	Spain	Catalonia	Girona	NE of Girona									#DIV/0!	#DIV/0!	No	Yes	No		P	2006	6	26	M	Yes	Yes						peach
15	L	Batllori	2016	Journal	Yes	Yes	Spain	Catalonia	Girona	NE of Girona									#DIV/0!	#DIV/0!	No	Yes	No		P	2006	7		L	Yes	Yes						peach
15	L	Batllori	2017	Journal	Yes	Yes	Spain	Catalonia	Girona	NE of Girona									#DIV/0!	#DIV/0!	No	Yes	No		P	2006	8		H	Yes	Yes						peach
15	L	Batllori	2018	Journal	Yes	Yes	Spain	Catalonia	Girona	NE of Girona									#DIV/0!	#DIV/0!	No	Yes	No		P	2006	9		P	Yes	Yes						peach
15	L	Batllori	2019	Journal	Yes	Yes	Spain	Catalonia	Girona	NE of Girona									#DIV/0!	#DIV/0!	No	Yes	No		P	2006	10		P	Yes	Yes						peach
15	L	Batllori	2020	Journal	Yes	Yes	Spain	Catalonia	Girona	NE of Girona									#DIV/0!	#DIV/0!	No	Yes	No		P	2006	11		H	Yes	Yes						peach
15	L	Batllori	2021	Journal	Yes	Yes	Spain	Catalonia	Girona	NE of Girona									#DIV/0!	#DIV/0!	No	Yes	No		P	2006	12		L	Yes	Yes						peach
30	J P	Cayol	1993	Journal	Yes	Yes	France			Avingon									#DIV/0!	#DIV/0!	No	Yes	No		P	1991	7		P	Yes	Yes						peach	nectarine	apple
30	J P	Cayol	1993	Journal	Yes	Yes	France			Avingon									#DIV/0!	#DIV/0!	No	Yes	No		P	1991	8		L	Yes	Yes						peach	nectarine	apple
30	J P	Cayol	1993	Journal	Yes	Yes	France			Avingon									#DIV/0!	#DIV/0!	No	Yes	No		P	1991	9		H	Yes	Yes						peach	nectarine	apple
30	J P	Cayol	1993	Journal	Yes	Yes	France			Avingon									#DIV/0!	#DIV/0!	No	Yes	No		P	1991	10		P	Yes	Yes						peach	nectarine	apple
30	J P	Cayol	1993	Journal	Yes	Yes	France			Avingon									#DIV/0!	#DIV/0!	No	Yes	No		P	1991	11		L	Yes	Yes						peach	nectarine	apple
92	S E	Michelakis	1992	Journal	Yes	Yes	Greece			Chiania									#DIV/0!	#DIV/0!	No	Yes	No		P	1986	5		L	Yes	Yes						citrus
92	S E	Michelakis	1992	Journal	Yes	Yes	Greece			Chiania									#DIV/0!	#DIV/0!	No	Yes	No		P	1986	6		P	Yes	Yes						citrus
92	S E	Michelakis	1992	Journal	Yes	Yes	Greece			Chiania									#DIV/0!	#DIV/0!	No	Yes	No		P	1986	7		P	Yes	Yes						citrus
92	S E	Michelakis	1992	Journal	Yes	Yes	Greece			Chiania									#DIV/0!	#DIV/0!	No	Yes	No		P	1986	8		L	Yes	Yes						citrus
92	S E	Michelakis	1992	Journal	Yes	Yes	Greece			Chiania									#DIV/0!	#DIV/0!	No	Yes	No		P	1986	9		P	Yes	Yes						citrus
92	S E	Michelakis	1992	Journal	Yes	Yes	Greece			Chiania									#DIV/0!	#DIV/0!	No	Yes	No		P	1986	10		H	Yes	Yes						citrus
92	S E	Michelakis	1992	Journal	Yes	Yes	Greece			Chiania									#DIV/0!	#DIV/0!	No	Yes	No		P	1986	11		L	Yes	Yes						citrus
92	S E	Michelakis	1992	Journal	Yes	Yes	Greece			Chiania									#DIV/0!	#DIV/0!	No	Yes	No		P	1986	12		M	Yes	Yes						citrus
92	S E	Michelakis	1992	Journal	Yes	Yes	Greece			Chiania									#DIV/0!	#DIV/0!	No	Yes	No		P	1987	6		L	Yes	Yes						citrus
92	S E	Michelakis	1992	Journal	Yes	Yes	Greece			Chiania									#DIV/0!	#DIV/0!	No	Yes	No		P	1987	7		H	Yes	Yes						citrus
92	S E	Michelakis	1992	Journal	Yes	Yes	Greece			Chiania									#DIV/0!	#DIV/0!	No	Yes	No		P	1987	8		P	Yes	Yes						citrus
92	S E	Michelakis	1992	Journal	Yes	Yes	Greece			Chiania									#DIV/0!	#DIV/0!	No	Yes	No		P	1987	9		L	Yes	Yes						citrus
92	S E	Michelakis	1992	Journal	Yes	Yes	Greece			Chiania									#DIV/0!	#DIV/0!	No	Yes	No		P	1987	10		H	Yes	Yes						citrus
92	S E	Michelakis	1992	Journal	Yes	Yes	Greece			Chiania									#DIV/0!	#DIV/0!	No	Yes	No		P	1987	11		P	Yes	Yes						citrus
92	S E	Michelakis	1992	Journal	Yes	Yes	Greece			Chiania									#DIV/0!	#DIV/0!	No	Yes	No		P	1987	12		P	Yes	Yes						citrus
105	S	Oukil	1997	Journal	Yes	Yes	France			Perpignan									#DIV/0!	#DIV/0!	No	Yes	No		P					Yes	No
105	S	Oukil	1997	Journal	Yes	Yes	Algeria			Boufarik									#DIV/0!	#DIV/0!	No	Yes	No		P					Yes	No
105	S	Oukil	1997	Journal	Yes	Yes	France			Montpellier									#DIV/0!	#DIV/0!	No	Yes	No		P					Yes	No
105	S	Oukil	1997	Journal	Yes	Yes	France			Avignon									#DIV/0!	#DIV/0!	No	Yes	No		P					Yes	No
105	S	Oukil	1997	Journal	Yes	Yes	Spain			Gerone									#DIV/0!	#DIV/0!	No	Yes	No		P					Yes	No
105	S	Oukil	1997	Journal	Yes	Yes	Italy			San Guiliano									#DIV/0!	#DIV/0!	No	Yes	No		P					Yes	No
120	S	Radonjic	2006	Journal	Yes	Yes	Montenegro			SE Coast									#DIV/0!	#DIV/0!	No	Yes	No		P	2000	10		First detection	Yes	Yes						mandarin
120	S	Radonjic	2006	Journal	Yes	Yes	Montenegro			Budva		GoogleEarth	42	17	19	18	50	31	42.2886	18.8419	No	Yes	No		P	2003	8		L	Yes	Yes
120	S	Radonjic	2006	Journal	Yes	Yes	Montenegro			Budva		GoogleEarth	42	17	19	18	50	31	42.2886	18.8419	No	Yes	No		P	2003	9		P	Yes	Yes
120	S	Radonjic	2006	Journal	Yes	Yes	Montenegro			Budva		GoogleEarth	42	17	19	18	50	31	42.2886	18.8419	No	Yes	No		P	2003	10		P	Yes	Yes
120	S	Radonjic	2006	Journal	Yes	Yes	Montenegro			Budva		GoogleEarth	42	17	19	18	50	31	42.2886	18.8419	No	Yes	No		P	2003	11		L	Yes	Yes
120	S	Radonjic	2006	Journal	Yes	Yes	Montenegro			Budva		GoogleEarth	42	17	19	18	50	31	42.2886	18.8419	No	Yes	No		P	2003	12		M	Yes	Yes
120	S	Radonjic	2006	Journal	Yes	Yes	Montenegro			Budva		GoogleEarth	42	17	19	18	50	31	42.2886	18.8419	No	Yes	No		P	2004	9		L	Yes	Yes
120	S	Radonjic	2006	Journal	Yes	Yes	Montenegro			Budva		GoogleEarth	42	17	19	18	50	31	42.2886	18.8419	No	Yes	No		P	2004	10		P	Yes	Yes
120	S	Radonjic	2006	Journal	Yes	Yes	Montenegro			Budva		GoogleEarth	42	17	19	18	50	31	42.2886	18.8419	No	Yes	No		P	2004	11		P	Yes	Yes
120	S	Radonjic	2006	Journal	Yes	Yes	Montenegro			Budva		GoogleEarth	42	17	19	18	50	31	42.2886	18.8419	No	Yes	No		P	2004	12		L	Yes	Yes
120	S	Radonjic	2006	Journal	Yes	Yes	Montenegro			Ulcing		GoogleEarth	41	55	45	19	13	26	41.9292	19.2239	No	Yes	No		P	2003	8		L	Yes	Yes						fig
120	S	Radonjic	2006	Journal	Yes	Yes	Montenegro			Ulcing		GoogleEarth	41	55	45	19	13	26	41.9292	19.2239	No	Yes	No		P	2003	9		P	Yes	Yes						fig
120	S	Radonjic	2006	Journal	Yes	Yes	Montenegro			Ulcing		GoogleEarth	41	55	45	19	13	26	41.9292	19.2239	No	Yes	No		P	2003	10		P	Yes	Yes						fig
120	S	Radonjic	2006	Journal	Yes	Yes	Montenegro			Ulcing		GoogleEarth	41	55	45	19	13	26	41.9292	19.2239	No	Yes	No		P	2003	11		L	Yes	Yes						fig
120	S	Radonjic	2006	Journal	Yes	Yes	Montenegro			Ulcing		GoogleEarth	41	55	45	19	13	26	41.9292	19.2239	No	Yes	No		P	2003	12		M	Yes	Yes						fig
120	S	Radonjic	2006	Journal	Yes	Yes	Montenegro			Ulcing		GoogleEarth	41	55	45	19	13	26	41.9292	19.2239	No	Yes	No		P	2004	9		L	Yes	Yes						fig
120	S	Radonjic	2006	Journal	Yes	Yes	Montenegro			Ulcing		GoogleEarth	41	55	45	19	13	26	41.9292	19.2239	No	Yes	No		P	2004	10		P	Yes	Yes						fig
120	S	Radonjic	2006	Journal	Yes	Yes	Montenegro			Ulcing		GoogleEarth	41	55	45	19	13	26	41.9292	19.2239	No	Yes	No		P	2004	11		P	Yes	Yes						fig
120	S	Radonjic	2006	Journal	Yes	Yes	Montenegro			Ulcing		GoogleEarth	41	55	45	19	13	26	41.9292	19.2239	No	Yes	No		P	2004	12		L	Yes	Yes						fig	kaki
120	S	Radonjic	2006	Journal	Yes	Yes	Montenegro			Bar		GoogleEarth	41	6	7	19	5	54	41.1019	19.0983	No	Yes	No		P	2003	8		L	Yes	Yes						fig	kaki
120	S	Radonjic	2006	Journal	Yes	Yes	Montenegro			Bar		GoogleEarth	41	6	7	19	5	54	41.1019	19.0983	No	Yes	No		P	2003	9		P	Yes	Yes						fig	kaki
120	S	Radonjic	2006	Journal	Yes	Yes	Montenegro			Bar		GoogleEarth	41	6	7	19	5	54	41.1019	19.0983	No	Yes	No		P	2003	10		P	Yes	Yes						fig	kaki
120	S	Radonjic	2006	Journal	Yes	Yes	Montenegro			Bar		GoogleEarth	41	6	7	19	5	54	41.1019	19.0983	No	Yes	No		P	2003	11		L	Yes	Yes						fig	kaki
120	S	Radonjic	2006	Journal	Yes	Yes	Montenegro			Bar		GoogleEarth	41	6	7	19	5	54	41.1019	19.0983	No	Yes	No		P	2003	12		M	Yes	Yes						fig	kaki
120	S	Radonjic	2006	Journal	Yes	Yes	Montenegro			Bar		GoogleEarth	41	6	7	19	5	54	41.1019	19.0983	No	Yes	No		P	2004	9		L	Yes	Yes						fig	kaki
120	S	Radonjic	2006	Journal	Yes	Yes	Montenegro			Bar		GoogleEarth	41	6	7	19	5	54	41.1019	19.0983	No	Yes	No		P	2004	10		P	Yes	Yes						fig	kaki
120	S	Radonjic	2006	Journal	Yes	Yes	Montenegro			Bar		GoogleEarth	41	6	7	19	5	54	41.1019	19.0983	No	Yes	No		P	2004	11		P	Yes	Yes						fig	kaki
120	S	Radonjic	2006	Journal	Yes	Yes	Montenegro			Bar		GoogleEarth	41	6	7	19	5	54	41.1019	19.0983	No	Yes	No		P	2004	12		L	Yes	Yes						fig	kaki
120	S	Radonjic	2006	Journal	Yes	Yes	Montenegro			Lastva Grbaljska		GoogleEarth	42	18	32	18	48	11	42.3089	18.8031	No	Yes	No		P	2003	8		L	Yes	Yes						mandarin
120	S	Radonjic	2006	Journal	Yes	Yes	Montenegro			Lastva Grbaljska		GoogleEarth	42	18	32	18	48	11	42.3089	18.8031	No	Yes	No		P	2003	9		P	Yes	Yes						mandarin
120	S	Radonjic	2006	Journal	Yes	Yes	Montenegro			Lastva Grbaljska		GoogleEarth	42	18	32	18	48	11	42.3089	18.8031	No	Yes	No		P	2003	10		P	Yes	Yes						mandarin
120	S	Radonjic	2006	Journal	Yes	Yes	Montenegro			Lastva Grbaljska		GoogleEarth	42	18	32	18	48	11	42.3089	18.8031	No	Yes	No		P	2003	11		L	Yes	Yes						mandarin
120	S	Radonjic	2006	Journal	Yes	Yes	Montenegro			Lastva Grbaljska		GoogleEarth	42	18	32	18	48	11	42.3089	18.8031	No	Yes	No		P	2003	12		M	Yes	Yes						mandarin
120	S	Radonjic	2006	Journal	Yes	Yes	Montenegro			Lastva Grbaljska		GoogleEarth	42	18	32	18	48	11	42.3089	18.8031	No	Yes	No		P	2004	9		L	Yes	Yes						mandarin
120	S	Radonjic	2006	Journal	Yes	Yes	Montenegro			Lastva Grbaljska		GoogleEarth	42	18	32	18	48	11	42.3089	18.8031	No	Yes	No		P	2004	10		P	Yes	Yes						mandarin
120	S	Radonjic	2006	Journal	Yes	Yes	Montenegro			Lastva Grbaljska		GoogleEarth	42	18	32	18	48	11	42.3089	18.8031	No	Yes	No		P	2004	11		P	Yes	Yes						mandarin
120	S	Radonjic	2006	Journal	Yes	Yes	Montenegro			Lastva Grbaljska		GoogleEarth	42	18	32	18	48	11	42.3089	18.8031	No	Yes	No		P	2004	12		L	Yes	Yes						mandarin
120	S	Radonjic	2006	Journal	Yes	Yes	Montenegro			Baosici		GoogleEarth	42	26	30	18	37	41	42.4417	18.6281	No	Yes	No		P	2003	8		L	Yes	Yes						mandarin
120	S	Radonjic	2006	Journal	Yes	Yes	Montenegro			Baosici		GoogleEarth	42	26	30	18	37	41	42.4417	18.6281	No	Yes	No		P	2003	9		P	Yes	Yes						mandarin
120	S	Radonjic	2006	Journal	Yes	Yes	Montenegro			Baosici		GoogleEarth	42	26	30	18	37	41	42.4417	18.6281	No	Yes	No		P	2003	10		P	Yes	Yes						mandarin
120	S	Radonjic	2006	Journal	Yes	Yes	Montenegro			Baosici		GoogleEarth	42	26	30	18	37	41	42.4417	18.6281	No	Yes	No		P	2003	11		L	Yes	Yes						mandarin
120	S	Radonjic	2006	Journal	Yes	Yes	Montenegro			Baosici		GoogleEarth	42	26	30	18	37	41	42.4417	18.6281	No	Yes	No		P	2003	12		M	Yes	Yes						mandarin
120	S	Radonjic	2006	Journal	Yes	Yes	Montenegro			Baosici		GoogleEarth	42	26	30	18	37	41	42.4417	18.6281	No	Yes	No		P	2004	9		L	Yes	Yes						mandarin
120	S	Radonjic	2006	Journal	Yes	Yes	Montenegro			Baosici		GoogleEarth	42	26	30	18	37	41	42.4417	18.6281	No	Yes	No		P	2004	10		P	Yes	Yes						mandarin
120	S	Radonjic	2006	Journal	Yes	Yes	Montenegro			Baosici		GoogleEarth	42	26	30	18	37	41	42.4417	18.6281	No	Yes	No		P	2004	11		P	Yes	Yes						mandarin
120	S	Radonjic	2006	Journal	Yes	Yes	Montenegro			Baosici		GoogleEarth	42	26	30	18	37	41	42.4417	18.6281	No	Yes	No		P	2004	12		L	Yes	Yes						mandarin
120	S	Radonjic	2006	Journal	Yes	Yes	Montenegro			Nijvice		GoogleEarth	42	26	8	18	30	53	42.4356	18.5147	No	Yes	No		P	2003	8		L	Yes	Yes						mandarin
120	S	Radonjic	2006	Journal	Yes	Yes	Montenegro			Nijvice		GoogleEarth	42	26	8	18	30	53	42.4356	18.5147	No	Yes	No		P	2003	9		P	Yes	Yes						mandarin
120	S	Radonjic	2006	Journal	Yes	Yes	Montenegro			Nijvice		GoogleEarth	42	26	8	18	30	53	42.4356	18.5147	No	Yes	No		P	2003	10		P	Yes	Yes						mandarin
120	S	Radonjic	2006	Journal	Yes	Yes	Montenegro			Nijvice		GoogleEarth	42	26	8	18	30	53	42.4356	18.5147	No	Yes	No		P	2003	11		L	Yes	Yes						mandarin
120	S	Radonjic	2006	Journal	Yes	Yes	Montenegro			Nijvice		GoogleEarth	42	26	8	18	30	53	42.4356	18.5147	No	Yes	No		P	2003	12		M	Yes	Yes						mandarin
120	S	Radonjic	2006	Journal	Yes	Yes	Montenegro			Nijvice		GoogleEarth	42	26	8	18	30	53	42.4356	18.5147	No	Yes	No		P	2004	9		L	Yes	Yes						mandarin
120	S	Radonjic	2006	Journal	Yes	Yes	Montenegro			Nijvice		GoogleEarth	42	26	8	18	30	53	42.4356	18.5147	No	Yes	No		P	2004	10		P	Yes	Yes						mandarin
120	S	Radonjic	2006	Journal	Yes	Yes	Montenegro			Nijvice		GoogleEarth	42	26	8	18	30	53	42.4356	18.5147	No	Yes	No		P	2004	11		P	Yes	Yes						mandarin
120	S	Radonjic	2006	Journal	Yes	Yes	Montenegro			Nijvice		GoogleEarth	42	26	8	18	30	53	42.4356	18.5147	No	Yes	No		P	2004	12		L	Yes	Yes						mandarin
93	D	Midgarden	2004	Journal	Yes	Yes	Guatemala			Santa Maria Valley		GoogleEarth	14	71		-91	53		15.1833	-91.8833	No	Yes	No	all year round? No info on temporal scale	P	2002				Yes	Yes
119	H	Puche	2005	Journal	Yes	Yes	Guatemala			Santa Maria Valley		GoogleEarth	14	71		-91	53		15.1833	-91.8833	No	Yes	No		P	2002	6			Yes	Yes						guava	citrus	coffee
119	H	Puche	2005	Journal	Yes	Yes	Guatemala			Santa Maria Valley		GoogleEarth	14	71		-91	53		15.1833	-91.8833	No	Yes	No		P	2002	7			Yes	Yes						guava	citrus	coffee
119	H	Puche	2005	Journal	Yes	Yes	Guatemala			Santa Maria Valley		GoogleEarth	14	71		-91	53		15.1833	-91.8833	No	Yes	No		P	2002	8			Yes	Yes						guava	citrus	coffee
119	H	Puche	2005	Journal	Yes	Yes	Guatemala			Santa Maria Valley		GoogleEarth	14	71		-91	53		15.1833	-91.8833	No	Yes	No		P	2002	9			Yes	Yes						guava	citrus	coffee
119	H	Puche	2005	Journal	Yes	Yes	Guatemala			Santa Maria Valley		GoogleEarth	14	71		-91	53		15.1833	-91.8833	No	Yes	No		P	2002	10			Yes	Yes						guava	citrus	coffee
124	I E	Rigamonti	2004	Journal	Yes	Yes	Italy			Milan		GoogleEarth	45	45		9	11	12	45.75	9.18667	No	Yes	No		P	2001	6			Yes	Yes						Golden delicious apple
124	I E	Rigamonti	2004	Journal	Yes	Yes	Italy			Milan		GoogleEarth	45	45		9	11	12	45.75	9.18667	No	Yes	No		P	2001	7		P	Yes	Yes						Golden delicious apple
124	I E	Rigamonti	2004	Journal	Yes	Yes	Italy			Milan		GoogleEarth	45	45		9	11	12	45.75	9.18667	No	Yes	No		P	2001	8		P	Yes	Yes						Golden delicious apple
124	I E	Rigamonti	2004	Journal	Yes	Yes	Italy			Milan		GoogleEarth	45	45		9	11	12	45.75	9.18667	No	Yes	No		P	2001	9			Yes	Yes						Golden delicious apple
124	I E	Rigamonti	2004	Journal	Yes	Yes	Italy			Milan		GoogleEarth	45	45		9	11	12	45.75	9.18667	No	Yes	No		P	2001	10			Yes	Yes						Golden delicious apple
124	I E	Rigamonti	2004	Journal	Yes	Yes	Italy			Milan		GoogleEarth	45	45		9	11	12	45.75	9.18667	No	Yes	No		P	2001	11			Yes	Yes						Golden delicious apple
124	I E	Rigamonti	2004	Journal	Yes	Yes	Italy			Milan		GoogleEarth	45	45		9	11	12	45.75	9.18667	No	Yes	No		P	2002	6			Yes	Yes						Golden delicious apple
124	I E	Rigamonti	2004	Journal	Yes	Yes	Italy			Milan		GoogleEarth	45	45		9	11	12	45.75	9.18667	No	Yes	No		P	2002	7		P	Yes	Yes						Golden delicious apple
124	I E	Rigamonti	2004	Journal	Yes	Yes	Italy			Milan		GoogleEarth	45	45		9	11	12	45.75	9.18667	No	Yes	No		P	2002	8		P	Yes	Yes						Golden delicious apple
124	I E	Rigamonti	2004	Journal	Yes	Yes	Italy			Milan		GoogleEarth	45	45		9	11	12	45.75	9.18667	No	Yes	No		P	2002	9			Yes	Yes						Golden delicious apple
124	I E	Rigamonti	2004	Journal	Yes	Yes	Italy			Milan		GoogleEarth	45	45		9	11	12	45.75	9.18667	No	Yes	No		P	2002	10			Yes	Yes						Golden delicious apple
124	I E	Rigamonti	2004	Journal	Yes	Yes	Italy			Milan		GoogleEarth	45	45		9	11	12	45.75	9.18667	No	Yes	No		P	2002	11			Yes	Yes						Golden delicious apple
124	I E	Rigamonti	2004	Journal	Yes	Yes	Italy			Milan		GoogleEarth	45	45		9	11	12	45.75	9.18667	No	Yes	No		P	2003	6			Yes	Yes						Golden delicious apple
124	I E	Rigamonti	2004	Journal	Yes	Yes	Italy			Milan		GoogleEarth	45	45		9	11	12	45.75	9.18667	No	Yes	No		P	2003	7			Yes	Yes						Golden delicious apple
124	I E	Rigamonti	2004	Journal	Yes	Yes	Italy			Milan		GoogleEarth	45	45		9	11	12	45.75	9.18667	No	Yes	No		P	2003	8			Yes	Yes						Golden delicious apple
124	I E	Rigamonti	2004	Journal	Yes	Yes	Italy			Milan		GoogleEarth	45	45		9	11	12	45.75	9.18667	No	Yes	No		P	2003	9			Yes	Yes						Golden delicious apple
124	I E	Rigamonti	2004	Journal	Yes	Yes	Italy			Milan		GoogleEarth	45	45		9	11	12	45.75	9.18667	No	Yes	No		P	2003	10			Yes	Yes						Golden delicious apple
124	I E	Rigamonti	2004	Journal	Yes	Yes	Italy			Milan		GoogleEarth	45	45		9	11	12	45.75	9.18667	No	Yes	No		P	2003	11			Yes	Yes						Golden delicious apple
49	F M	Eskafi	1990	Journal	Yes	Yes	Guatemala		0-500m	Guatemala									#DIV/0!	#DIV/0!	No	Yes	No		P	1980-83	1		M	Yes	Yes						coffee	guava	peach	tangerine	orange	loquat
49	F M	Eskafi	1990	Journal	Yes	Yes	Guatemala		0-500m	Guatemala									#DIV/0!	#DIV/0!	No	Yes	No		P	1980-83	2		L	Yes	Yes						coffee	guava	peach	tangerine	orange	loquat
49	F M	Eskafi	1990	Journal	Yes	Yes	Guatemala		0-500m	Guatemala									#DIV/0!	#DIV/0!	No	Yes	No		P	1980-83	3		L	Yes	Yes						coffee	guava	peach	tangerine	orange	loquat
49	F M	Eskafi	1990	Journal	Yes	Yes	Guatemala		0-500m	Guatemala									#DIV/0!	#DIV/0!	No	Yes	No		P	1980-83	4		M	Yes	Yes						coffee	guava	peach	tangerine	orange	loquat
49	F M	Eskafi	1990	Journal	Yes	Yes	Guatemala		0-500m	Guatemala									#DIV/0!	#DIV/0!	No	Yes	No		P	1980-83	5		L	Yes	Yes						coffee	guava	peach	tangerine	orange	loquat
49	F M	Eskafi	1990	Journal	Yes	Yes	Guatemala		0-500m	Guatemala									#DIV/0!	#DIV/0!	No	Yes	No		P	1980-83	6		L	Yes	Yes						coffee	guava	peach	tangerine	orange	loquat
49	F M	Eskafi	1990	Journal	Yes	Yes	Guatemala		0-500m	Guatemala									#DIV/0!	#DIV/0!	No	Yes	No		P	1980-83	7		H	Yes	Yes						coffee	guava	peach	tangerine	orange	loquat
49	F M	Eskafi	1990	Journal	Yes	Yes	Guatemala		0-500m	Guatemala									#DIV/0!	#DIV/0!	No	Yes	No		P	1980-83	8		P	Yes	Yes						coffee	guava	peach	tangerine	orange	loquat
49	F M	Eskafi	1990	Journal	Yes	Yes	Guatemala		0-500m	Guatemala									#DIV/0!	#DIV/0!	No	Yes	No		P	1980-83	9		L	Yes	Yes						coffee	guava	peach	tangerine	orange	loquat
49	F M	Eskafi	1990	Journal	Yes	Yes	Guatemala		0-500m	Guatemala									#DIV/0!	#DIV/0!	No	Yes	No		P	1980-83	10		L	Yes	Yes						coffee	guava	peach	tangerine	orange	loquat
49	F M	Eskafi	1990	Journal	Yes	Yes	Guatemala		0-500m	Guatemala									#DIV/0!	#DIV/0!	No	Yes	No		P	1980-83	11		L	Yes	Yes						coffee	guava	peach	tangerine	orange	loquat
49	F M	Eskafi	1990	Journal	Yes	Yes	Guatemala		0-500m	Guatemala									#DIV/0!	#DIV/0!	No	Yes	No		P	1980-83	12		M	Yes	Yes						coffee	guava	peach	tangerine	orange	loquat
49	F M	Eskafi	1990	Journal	Yes	Yes	Guatemala		500-1000m	Guatemala									#DIV/0!	#DIV/0!	No	Yes	No		P	1980-83	1		H	Yes	Yes						coffee	guava	peach	tangerine	orange	loquat
49	F M	Eskafi	1990	Journal	Yes	Yes	Guatemala		500-1000m	Guatemala									#DIV/0!	#DIV/0!	No	Yes	No		P	1980-83	2		H	Yes	Yes						coffee	guava	peach	tangerine	orange	loquat
49	F M	Eskafi	1990	Journal	Yes	Yes	Guatemala		500-1000m	Guatemala									#DIV/0!	#DIV/0!	No	Yes	No		P	1980-83	3		L	Yes	Yes						coffee	guava	peach	tangerine	orange	loquat
49	F M	Eskafi	1990	Journal	Yes	Yes	Guatemala		500-1000m	Guatemala									#DIV/0!	#DIV/0!	No	Yes	No		P	1980-83	4		H	Yes	Yes						coffee	guava	peach	tangerine	orange	loquat
49	F M	Eskafi	1990	Journal	Yes	Yes	Guatemala		500-1000m	Guatemala									#DIV/0!	#DIV/0!	No	Yes	No		P	1980-83	5		H	Yes	Yes						coffee	guava	peach	tangerine	orange	loquat
49	F M	Eskafi	1990	Journal	Yes	Yes	Guatemala		500-1000m	Guatemala									#DIV/0!	#DIV/0!	No	Yes	No		P	1980-83	6		P	Yes	Yes						coffee	guava	peach	tangerine	orange	loquat
49	F M	Eskafi	1990	Journal	Yes	Yes	Guatemala		500-1000m	Guatemala									#DIV/0!	#DIV/0!	No	Yes	No		P	1980-83	7		H	Yes	Yes						coffee	guava	peach	tangerine	orange	loquat
49	F M	Eskafi	1990	Journal	Yes	Yes	Guatemala		500-1000m	Guatemala									#DIV/0!	#DIV/0!	No	Yes	No		P	1980-83	8		H	Yes	Yes						coffee	guava	peach	tangerine	orange	loquat
49	F M	Eskafi	1990	Journal	Yes	Yes	Guatemala		500-1000m	Guatemala									#DIV/0!	#DIV/0!	No	Yes	No		P	1980-83	9		H	Yes	Yes						coffee	guava	peach	tangerine	orange	loquat
49	F M	Eskafi	1990	Journal	Yes	Yes	Guatemala		500-1000m	Guatemala									#DIV/0!	#DIV/0!	No	Yes	No		P	1980-83	10		L	Yes	Yes						coffee	guava	peach	tangerine	orange	loquat
49	F M	Eskafi	1990	Journal	Yes	Yes	Guatemala		500-1000m	Guatemala									#DIV/0!	#DIV/0!	No	Yes	No		P	1980-83	11		L	Yes	Yes						coffee	guava	peach	tangerine	orange	loquat
49	F M	Eskafi	1990	Journal	Yes	Yes	Guatemala		500-1000m	Guatemala									#DIV/0!	#DIV/0!	No	Yes	No		P	1980-83	12		H	Yes	Yes						coffee	guava	peach	tangerine	orange	loquat
49	F M	Eskafi	1990	Journal	Yes	Yes	Guatemala		1000-1500m	Guatemala									#DIV/0!	#DIV/0!	No	Yes	No		P	1980-83	1		L	Yes	Yes						coffee	guava	peach	tangerine	orange	loquat
49	F M	Eskafi	1990	Journal	Yes	Yes	Guatemala		1000-1500m	Guatemala									#DIV/0!	#DIV/0!	No	Yes	No		P	1980-83	2		H	Yes	Yes						coffee	guava	peach	tangerine	orange	loquat
49	F M	Eskafi	1990	Journal	Yes	Yes	Guatemala		1000-1500m	Guatemala									#DIV/0!	#DIV/0!	No	Yes	No		P	1980-83	3		P	Yes	Yes						coffee	guava	peach	tangerine	orange	loquat
49	F M	Eskafi	1990	Journal	Yes	Yes	Guatemala		1000-1500m	Guatemala									#DIV/0!	#DIV/0!	No	Yes	No		P	1980-83	4		H	Yes	Yes						coffee	guava	peach	tangerine	orange	loquat
49	F M	Eskafi	1990	Journal	Yes	Yes	Guatemala		1000-1500m	Guatemala									#DIV/0!	#DIV/0!	No	Yes	No		P	1980-83	5		P	Yes	Yes						coffee	guava	peach	tangerine	orange	loquat
49	F M	Eskafi	1990	Journal	Yes	Yes	Guatemala		1000-1500m	Guatemala									#DIV/0!	#DIV/0!	No	Yes	No		P	1980-83	6		P	Yes	Yes						coffee	guava	peach	tangerine	orange	loquat
49	F M	Eskafi	1990	Journal	Yes	Yes	Guatemala		1000-1500m	Guatemala									#DIV/0!	#DIV/0!	No	Yes	No		P	1980-83	7		H	Yes	Yes						coffee	guava	peach	tangerine	orange	loquat
49	F M	Eskafi	1990	Journal	Yes	Yes	Guatemala		1000-1500m	Guatemala									#DIV/0!	#DIV/0!	No	Yes	No		P	1980-83	8		L	Yes	Yes						coffee	guava	peach	tangerine	orange	loquat
49	F M	Eskafi	1990	Journal	Yes	Yes	Guatemala		1000-1500m	Guatemala									#DIV/0!	#DIV/0!	No	Yes	No		P	1980-83	9		H	Yes	Yes						coffee	guava	peach	tangerine	orange	loquat
49	F M	Eskafi	1990	Journal	Yes	Yes	Guatemala		1000-1500m	Guatemala									#DIV/0!	#DIV/0!	No	Yes	No		P	1980-83	10		H	Yes	Yes						coffee	guava	peach	tangerine	orange	loquat
49	F M	Eskafi	1990	Journal	Yes	Yes	Guatemala		1000-1500m	Guatemala									#DIV/0!	#DIV/0!	No	Yes	No		P	1980-83	11		H	Yes	Yes						coffee	guava	peach	tangerine	orange	loquat
49	F M	Eskafi	1990	Journal	Yes	Yes	Guatemala		1000-1500m	Guatemala									#DIV/0!	#DIV/0!	No	Yes	No		P	1980-83	12		H	Yes	Yes						coffee	guava	peach	tangerine	orange	loquat
49	F M	Eskafi	1990	Journal	Yes	Yes	Guatemala		1500-2000m	Guatemala									#DIV/0!	#DIV/0!	No	Yes	No		P	1980-83	1		H	Yes	Yes						coffee	guava	peach	tangerine	orange	loquat
49	F M	Eskafi	1990	Journal	Yes	Yes	Guatemala		1500-2000m	Guatemala									#DIV/0!	#DIV/0!	No	Yes	No		P	1980-83	2		L	Yes	Yes						coffee	guava	peach	tangerine	orange	loquat
49	F M	Eskafi	1990	Journal	Yes	Yes	Guatemala		1500-2000m	Guatemala									#DIV/0!	#DIV/0!	No	Yes	No		P	1980-83	3		L	Yes	Yes						coffee	guava	peach	tangerine	orange	loquat
49	F M	Eskafi	1990	Journal	Yes	Yes	Guatemala		1500-2000m	Guatemala									#DIV/0!	#DIV/0!	No	Yes	No		P	1980-83	4		P	Yes	Yes						coffee	guava	peach	tangerine	orange	loquat
49	F M	Eskafi	1990	Journal	Yes	Yes	Guatemala		1500-2000m	Guatemala									#DIV/0!	#DIV/0!	No	Yes	No		P	1980-83	5		H	Yes	Yes						coffee	guava	peach	tangerine	orange	loquat
49	F M	Eskafi	1990	Journal	Yes	Yes	Guatemala		1500-2000m	Guatemala									#DIV/0!	#DIV/0!	No	Yes	No		P	1980-83	6		P	Yes	Yes						coffee	guava	peach	tangerine	orange	loquat
49	F M	Eskafi	1990	Journal	Yes	Yes	Guatemala		1500-2000m	Guatemala									#DIV/0!	#DIV/0!	No	Yes	No		P	1980-83	7		H	Yes	Yes						coffee	guava	peach	tangerine	orange	loquat
49	F M	Eskafi	1990	Journal	Yes	Yes	Guatemala		1500-2000m	Guatemala									#DIV/0!	#DIV/0!	No	Yes	No		P	1980-83	8		H	Yes	Yes						coffee	guava	peach	tangerine	orange	loquat
49	F M	Eskafi	1990	Journal	Yes	Yes	Guatemala		1500-2000m	Guatemala									#DIV/0!	#DIV/0!	No	Yes	No		P	1980-83	9		L	Yes	Yes						coffee	guava	peach	tangerine	orange	loquat
49	F M	Eskafi	1990	Journal	Yes	Yes	Guatemala		1500-2000m	Guatemala									#DIV/0!	#DIV/0!	No	Yes	No		P	1980-83	10		H	Yes	Yes						coffee	guava	peach	tangerine	orange	loquat
49	F M	Eskafi	1990	Journal	Yes	Yes	Guatemala		1500-2000m	Guatemala									#DIV/0!	#DIV/0!	No	Yes	No		P	1980-83	11		H	Yes	Yes						coffee	guava	peach	tangerine	orange	loquat
49	F M	Eskafi	1990	Journal	Yes	Yes	Guatemala		1500-2000m	Guatemala									#DIV/0!	#DIV/0!	No	Yes	No		P	1980-83	12		H	Yes	Yes						coffee	guava	peach	tangerine	orange	loquat
49	F M	Eskafi	1990	Journal	Yes	Yes	Guatemala		2000-2500m	Guatemala									#DIV/0!	#DIV/0!	No	Yes	No		P	1980-83	7		H	Yes	Yes						coffee	guava	peach	tangerine	orange	loquat
49	F M	Eskafi	1990	Journal	Yes	Yes	Guatemala		2000-2500m	Guatemala									#DIV/0!	#DIV/0!	No	Yes	No		P	1980-83	8		P	Yes	Yes						coffee	guava	peach	tangerine	orange	loquat
49	F M	Eskafi	1990	Journal	Yes	Yes	Guatemala		2000-2500m	Guatemala									#DIV/0!	#DIV/0!	No	Yes	No		P	1980-83	9		L	Yes	Yes						coffee	guava	peach	tangerine	orange	loquat
49	F M	Eskafi	1990	Journal	Yes	Yes	Guatemala		2000-2500m	Guatemala									#DIV/0!	#DIV/0!	No	Yes	No		P	1980-83	10		L	Yes	Yes						coffee	guava	peach	tangerine	orange	loquat
49	F M	Eskafi	1990	Journal	Yes	Yes	Guatemala			Antigua		GoogleEarth	14	34	39	-90	44	7	14.5775	-90.7353	No	Yes	No		P	1985	1			Yes	Yes						coffee
49	F M	Eskafi	1990	Journal	Yes	Yes	Guatemala			Antigua		GoogleEarth	14	34	39	-90	44	7	14.5775	-90.7353	No	Yes	No		P	1985	2			Yes	Yes						coffee
49	F M	Eskafi	1990	Journal	Yes	Yes	Guatemala			Antigua		GoogleEarth	14	34	39	-90	44	7	14.5775	-90.7353	No	Yes	No		P	1985	3			Yes	Yes						coffee
49	F M	Eskafi	1990	Journal	Yes	Yes	Guatemala			Antigua		GoogleEarth	14	34	39	-90	44	7	14.5775	-90.7353	No	Yes	No		P	1985	4			Yes	Yes						coffee
49	F M	Eskafi	1990	Journal	Yes	Yes	Guatemala			Antigua		GoogleEarth	14	34	39	-90	44	7	14.5775	-90.7353	No	Yes	No		P	1985	5			Yes	Yes						coffee
49	F M	Eskafi	1990	Journal	Yes	Yes	Guatemala			Antigua		GoogleEarth	14	34	39	-90	44	7	14.5775	-90.7353	No	Yes	No		P	1985	6			Yes	Yes						coffee
49	F M	Eskafi	1990	Journal	Yes	Yes	Guatemala			Antigua		GoogleEarth	14	34	39	-90	44	7	14.5775	-90.7353	No	Yes	No		P	1985	7			Yes	Yes						coffee
49	F M	Eskafi	1990	Journal	Yes	Yes	Guatemala			Antigua		GoogleEarth	14	34	39	-90	44	7	14.5775	-90.7353	No	Yes	No		P	1984	8			Yes	Yes						coffee
49	F M	Eskafi	1990	Journal	Yes	Yes	Guatemala			Antigua		GoogleEarth	14	34	39	-90	44	7	14.5775	-90.7353	No	Yes	No		P	1984	9			Yes	Yes						coffee
49	F M	Eskafi	1990	Journal	Yes	Yes	Guatemala			Antigua		GoogleEarth	14	34	39	-90	44	7	14.5775	-90.7353	No	Yes	No		P	1984	10			Yes	Yes						coffee
49	F M	Eskafi	1990	Journal	Yes	Yes	Guatemala			Antigua		GoogleEarth	14	34	39	-90	44	7	14.5775	-90.7353	No	Yes	No		P	1984	11			Yes	Yes						coffee
49	F M	Eskafi	1990	Journal	Yes	Yes	Guatemala			Antigua		GoogleEarth	14	34	39	-90	44	7	14.5775	-90.7353	No	Yes	No		P	1984	12			Yes	Yes						coffee
66	N	Israely	1997	Journal	Yes	Yes	Israel			Kibbutz Zova		GoogleEarth	31	51	8	35	5	14	31.8522	35.0872	No	Yes	No	insectide treatments	P	1994	5		L	Yes	Yes						nectarines	apple	walnuts	pear
66	N	Israely	1997	Journal	Yes	Yes	Israel			Kibbutz Zova		GoogleEarth	31	51	8	35	5	14	31.8522	35.0872	No	Yes	No	insectide treatments	P	1994	6		H	Yes	Yes						nectarines	apple	walnuts	pear
66	N	Israely	1997	Journal	Yes	Yes	Israel			Kibbutz Zova		GoogleEarth	31	51	8	35	5	14	31.8522	35.0872	No	Yes	No	insectide treatments	P	1994	7		L	Yes	Yes						nectarines	apple	walnuts	pear
66	N	Israely	1997	Journal	Yes	Yes	Israel			Kibbutz Zova		GoogleEarth	31	51	8	35	5	14	31.8522	35.0872	No	Yes	No	insectide treatments	P	1994	8		L	Yes	Yes						nectarines	apple	walnuts	pear
66	N	Israely	1997	Journal	Yes	Yes	Israel			Kibbutz Zova		GoogleEarth	31	51	8	35	5	14	31.8522	35.0872	No	Yes	No	insectide treatments	P	1994	9		H	Yes	Yes						nectarines	apple	walnuts	pear
66	N	Israely	1997	Journal	Yes	Yes	Israel			Kibbutz Zova		GoogleEarth	31	51	8	35	5	14	31.8522	35.0872	No	Yes	No	insectide treatments	P	1994	10		P	Yes	Yes						nectarines	apple	walnuts	pear
66	N	Israely	1997	Journal	Yes	Yes	Israel			Kibbutz Zova		GoogleEarth	31	51	8	35	5	14	31.8522	35.0872	No	Yes	No	insectide treatments	P	1994	11		P	Yes	Yes						nectarines	apple	walnuts	pear
66	N	Israely	1997	Journal	Yes	Yes	Israel			Kibbutz Zova		GoogleEarth	31	51	8	35	5	14	31.8522	35.0872	No	Yes	No	insectide treatments	P	1994	12		L	Yes	Yes						nectarines	apple	walnuts	pear
66	N	Israely	1997	Journal	Yes	Yes	Israel			Kibbutz Zova		GoogleEarth	31	51	8	35	5	14	31.8522	35.0872	No	Yes	No	insectide treatments	P	1995	5		L	Yes	Yes						nectarines	apple	walnuts	pear
66	N	Israely	1997	Journal	Yes	Yes	Israel			Kibbutz Zova		GoogleEarth	31	51	8	35	5	14	31.8522	35.0872	No	Yes	No	insectide treatments	P	1995	6		H	Yes	Yes						nectarines	apple	walnuts	pear
66	N	Israely	1997	Journal	Yes	Yes	Israel			Kibbutz Zova		GoogleEarth	31	51	8	35	5	14	31.8522	35.0872	No	Yes	No	insectide treatments	P	1995	7		L	Yes	Yes						nectarines	apple	walnuts	pear
66	N	Israely	1997	Journal	Yes	Yes	Israel			Kibbutz Zova		GoogleEarth	31	51	8	35	5	14	31.8522	35.0872	No	Yes	No	insectide treatments	P	1995	8		L	Yes	Yes						nectarines	apple	walnuts	pear
66	N	Israely	1997	Journal	Yes	Yes	Israel			Kibbutz Zova		GoogleEarth	31	51	8	35	5	14	31.8522	35.0872	No	Yes	No	insectide treatments	P	1995	9		H	Yes	Yes						nectarines	apple	walnuts	pear
66	N	Israely	1997	Journal	Yes	Yes	Israel			Kibbutz Zova		GoogleEarth	31	51	8	35	5	14	31.8522	35.0872	No	Yes	No	insectide treatments	P	1995	10		P	Yes	Yes						nectarines	apple	walnuts	pear
66	N	Israely	1997	Journal	Yes	Yes	Israel			Kibbutz Zova		GoogleEarth	31	51	8	35	5	14	31.8522	35.0872	No	Yes	No	insectide treatments	P	1995	11		P	Yes	Yes						nectarines	apple	walnuts	pear
66	N	Israely	1997	Journal	Yes	Yes	Israel			Kibbutz Zova		GoogleEarth	31	51	8	35	5	14	31.8522	35.0872	No	Yes	No	insectide treatments	P	1995	12		L	Yes	Yes						nectarines	apple	walnuts	pear
70	B I	Katsoyannos	1998	Journal	Yes	Yes	Greece			Chios Island		GoogleEarth	38	30	0	26	0	0	38.5	26	No	Yes	No		P	1991	7		L	Yes	Yes						apricot	mandarin	orange	lemon	fig
70	B I	Katsoyannos	1998	Journal	Yes	Yes	Greece			Chios Island		GoogleEarth	38	30	0	26	0	0	38.5	26	No	Yes	No		P	1991	8		P	Yes	Yes						apricot	mandarin	orange	lemon	fig
70	B I	Katsoyannos	1998	Journal	Yes	Yes	Greece			Chios Island		GoogleEarth	38	30	0	26	0	0	38.5	26	No	Yes	No		P	1991	9		P	Yes	Yes						apricot	mandarin	orange	lemon	fig
70	B I	Katsoyannos	1998	Journal	Yes	Yes	Greece			Chios Island		GoogleEarth	38	30	0	26	0	0	38.5	26	No	Yes	No		P	1991	10		H	Yes	Yes						apricot	mandarin	orange	lemon	fig
70	B I	Katsoyannos	1998	Journal	Yes	Yes	Greece			Chios Island		GoogleEarth	38	30	0	26	0	0	38.5	26	No	Yes	No		P	1991	11		P	Yes	Yes						apricot	mandarin	orange	lemon	fig
70	B I	Katsoyannos	1998	Journal	Yes	Yes	Greece			Chios Island		GoogleEarth	38	30	0	26	0	0	38.5	26	No	Yes	No		P	1991	12		L	Yes	Yes						apricot	mandarin	orange	lemon	fig
70	B I	Katsoyannos	1998	Journal	Yes	Yes	Greece			Chios Island		GoogleEarth	38	30	0	26	0	0	38.5	26	No	Yes	No		P	1992	1		M	Yes	Yes						apricot	mandarin	orange	lemon	fig
70	B I	Katsoyannos	1998	Journal	Yes	Yes	Greece			Chios Island		GoogleEarth	38	30	0	26	0	0	38.5	26	No	Yes	No		P	1992	6		L	Yes	Yes						apricot	mandarin	orange	lemon	fig
70	B I	Katsoyannos	1998	Journal	Yes	Yes	Greece			Chios Island		GoogleEarth	38	30	0	26	0	0	38.5	26	No	Yes	No		P	1992	7		L	Yes	Yes						apricot	mandarin	orange	lemon	fig
70	B I	Katsoyannos	1998	Journal	Yes	Yes	Greece			Chios Island		GoogleEarth	38	30	0	26	0	0	38.5	26	No	Yes	No		P	1992	8		P	Yes	Yes						apricot	mandarin	orange	lemon	fig
70	B I	Katsoyannos	1998	Journal	Yes	Yes	Greece			Chios Island		GoogleEarth	38	30	0	26	0	0	38.5	26	No	Yes	No		P	1992	9		P	Yes	Yes						apricot	mandarin	orange	lemon	fig
70	B I	Katsoyannos	1998	Journal	Yes	Yes	Greece			Chios Island		GoogleEarth	38	30	0	26	0	0	38.5	26	No	Yes	No		P	1992	10		H	Yes	Yes						apricot	mandarin	orange	lemon	fig
70	B I	Katsoyannos	1998	Journal	Yes	Yes	Greece			Chios Island		GoogleEarth	38	30	0	26	0	0	38.5	26	No	Yes	No		P	1992	11		P	Yes	Yes						apricot	mandarin	orange	lemon	fig
70	B I	Katsoyannos	1998	Journal	Yes	Yes	Greece			Chios Island		GoogleEarth	38	30	0	26	0	0	38.5	26	No	Yes	No		P	1992	12		L	Yes	Yes						apricot	mandarin	orange	lemon	fig
70	B I	Katsoyannos	1998	Journal	Yes	Yes	Greece			Chios Island		GoogleEarth	38	30	0	26	0	0	38.5	26	No	Yes	No		P	1993	1		M	Yes	Yes						apricot	mandarin	orange	lemon	fig
70	B I	Katsoyannos	1998	Journal	Yes	Yes	Greece			Chios Island		GoogleEarth	38	30	0	26	0	0	38.5	26	No	Yes	No		P	1993	6		M	Yes	Yes						apricot	mandarin	orange	lemon	fig
70	B I	Katsoyannos	1998	Journal	Yes	Yes	Greece			Chios Island		GoogleEarth	38	30	0	26	0	0	38.5	26	No	Yes	No		P	1993	7		L	Yes	Yes						apricot	mandarin	orange	lemon	fig
70	B I	Katsoyannos	1998	Journal	Yes	Yes	Greece			Chios Island		GoogleEarth	38	30	0	26	0	0	38.5	26	No	Yes	No		P	1993	8		P	Yes	Yes						apricot	mandarin	orange	lemon	fig
70	B I	Katsoyannos	1998	Journal	Yes	Yes	Greece			Chios Island		GoogleEarth	38	30	0	26	0	0	38.5	26	No	Yes	No		P	1993	9		P	Yes	Yes						apricot	mandarin	orange	lemon	fig
70	B I	Katsoyannos	1998	Journal	Yes	Yes	Greece			Chios Island		GoogleEarth	38	30	0	26	0	0	38.5	26	No	Yes	No		P	1993	10		H	Yes	Yes						apricot	mandarin	orange	lemon	fig
70	B I	Katsoyannos	1998	Journal	Yes	Yes	Greece			Chios Island		GoogleEarth	38	30	0	26	0	0	38.5	26	No	Yes	No		P	1993	11		P	Yes	Yes						apricot	mandarin	orange	lemon	fig
70	B I	Katsoyannos	1998	Journal	Yes	Yes	Greece			Chios Island		GoogleEarth	38	30	0	26	0	0	38.5	26	No	Yes	No		P	1993	12		L	Yes	Yes						apricot	mandarin	orange	lemon	fig
70	B I	Katsoyannos	1998	Journal	Yes	Yes	Greece			Chios Island		GoogleEarth	38	30	0	26	0	0	38.5	26	No	Yes	No		P	1994	1		M	Yes	Yes						apricot	mandarin	orange	lemon	fig
22	M	Borge	1997	Journal	Yes	Yes	Nicaragua			Meseta de los Pueblos	interpolated	GoogleEarth	11	59	8	-86	17	47	11.9856	-86.2964	No	Yes	No		P	1994	6		L	Yes	Yes						cofee	citrus
22	M	Borge	1997	Journal	Yes	Yes	Nicaragua			Meseta de los Pueblos	interpolated	GoogleEarth	11	59	8	-86	17	47	11.9856	-86.2964	No	Yes	No		P	1995	10		M	Yes	Yes						cofee	citrus
22	M	Borge	1997	Journal	Yes	Yes	Nicaragua			Meseta de los Pueblos	interpolated	GoogleEarth	11	59	8	-86	17	47	11.9856	-86.2964	No	Yes	No		P	1995	11		L	Yes	Yes						cofee	citrus
22	M	Borge	1997	Journal	Yes	Yes	Nicaragua			Meseta de los Pueblos	interpolated	GoogleEarth	11	59	8	-86	17	47	11.9856	-86.2964	No	Yes	No		P	1995	12		L	Yes	Yes						cofee	citrus
22	M	Borge	1997	Journal	Yes	Yes	Nicaragua			Meseta de los Pueblos	interpolated	GoogleEarth	11	59	8	-86	17	47	11.9856	-86.2964	No	Yes	No		P	1995	1		H	Yes	Yes						cofee	citrus
22	M	Borge	1997	Journal	Yes	Yes	Nicaragua			Meseta de los Pueblos	interpolated	GoogleEarth	11	59	8	-86	17	47	11.9856	-86.2964	No	Yes	No		P	1995	2		P	Yes	Yes						cofee	citrus
22	M	Borge	1997	Journal	Yes	Yes	Nicaragua			Meseta de los Pueblos	interpolated	GoogleEarth	11	59	8	-86	17	47	11.9856	-86.2964	No	Yes	No		P	1995	3		H	Yes	Yes						cofee	citrus
22	M	Borge	1997	Journal	Yes	Yes	Nicaragua			Meseta de los Pueblos	interpolated	GoogleEarth	11	59	8	-86	17	47	11.9856	-86.2964	No	Yes	No		P	1995	4		H	Yes	Yes						cofee	citrus
22	M	Borge	1997	Journal	Yes	Yes	Nicaragua			Meseta de los Pueblos	interpolated	GoogleEarth	11	59	8	-86	17	47	11.9856	-86.2964	No	Yes	No		P	1995	5		L	Yes	Yes						cofee	citrus
125	E	Rivnay	1941	Journal	Yes	Yes	Israel			Rehovot	previously Palestine	GoogleEarth	31	53	34	34	48	41	31.8928	34.8114	No	Yes	No		P	1939	4		M	Yes	Yes						citrus
125	E	Rivnay	1941	Journal	Yes	Yes	Israel			Rehovot	previously Palestine	GoogleEarth	31	53	34	34	48	41	31.8928	34.8114	No	Yes	No		P	1939	5		L	Yes	Yes						citrus
125	E	Rivnay	1941	Journal	Yes	Yes	Israel			Rehovot	previously Palestine	GoogleEarth	31	53	34	34	48	41	31.8928	34.8114	No	Yes	No		P	1939	6		L	Yes	Yes						citrus
125	E	Rivnay	1941	Journal	Yes	Yes	Israel			Rehovot	previously Palestine	GoogleEarth	31	53	34	34	48	41	31.8928	34.8114	No	Yes	No		P	1939	7		H	Yes	Yes						citrus
125	E	Rivnay	1941	Journal	Yes	Yes	Israel			Rehovot	previously Palestine	GoogleEarth	31	53	34	34	48	41	31.8928	34.8114	No	Yes	No		P	1939	8		H	Yes	Yes						citrus
125	E	Rivnay	1941	Journal	Yes	Yes	Israel			Rehovot	previously Palestine	GoogleEarth	31	53	34	34	48	41	31.8928	34.8114	No	Yes	No		P	1939	9		P	Yes	Yes						citrus
125	E	Rivnay	1941	Journal	Yes	Yes	Israel			Rehovot	previously Palestine	GoogleEarth	31	53	34	34	48	41	31.8928	34.8114	No	Yes	No		P	1939	10		P	Yes	Yes						citrus
125	E	Rivnay	1941	Journal	Yes	Yes	Israel			Rehovot	previously Palestine	GoogleEarth	31	53	34	34	48	41	31.8928	34.8114	No	Yes	No		P	1939	11		L	Yes	Yes						citrus
125	E	Rivnay	1941	Journal	Yes	Yes	Israel			Rehovot	previously Palestine	GoogleEarth	31	53	34	34	48	41	31.8928	34.8114	No	Yes	No		P	1939	12		M	Yes	Yes						citrus
125	E	Rivnay	1941	Journal	Yes	Yes	Israel			Rehovot	previously Palestine	GoogleEarth	31	53	34	34	48	41	31.8928	34.8114	No	Yes	No		P	1943	4		M	Yes	Yes						citrus
125	E	Rivnay	1941	Journal	Yes	Yes	Israel			Rehovot	previously Palestine	GoogleEarth	31	53	34	34	48	41	31.8928	34.8114	No	Yes	No		P	1943	5		L	Yes	Yes						citrus
125	E	Rivnay	1941	Journal	Yes	Yes	Israel			Rehovot	previously Palestine	GoogleEarth	31	53	34	34	48	41	31.8928	34.8114	No	Yes	No		P	1943	6		H	Yes	Yes						citrus
125	E	Rivnay	1941	Journal	Yes	Yes	Israel			Rehovot	previously Palestine	GoogleEarth	31	53	34	34	48	41	31.8928	34.8114	No	Yes	No		P	1943	7		L	Yes	Yes						citrus
125	E	Rivnay	1941	Journal	Yes	Yes	Israel			Rehovot	previously Palestine	GoogleEarth	31	53	34	34	48	41	31.8928	34.8114	No	Yes	No		P	1943	8		H	Yes	Yes						citrus
125	E	Rivnay	1941	Journal	Yes	Yes	Israel			Rehovot	previously Palestine	GoogleEarth	31	53	34	34	48	41	31.8928	34.8114	No	Yes	No		P	1943	9		P	Yes	Yes						citrus
125	E	Rivnay	1941	Journal	Yes	Yes	Israel			Rehovot	previously Palestine	GoogleEarth	31	53	34	34	48	41	31.8928	34.8114	No	Yes	No		P	1943	10		H	Yes	Yes						citrus
125	E	Rivnay	1941	Journal	Yes	Yes	Israel			Rehovot	previously Palestine	GoogleEarth	31	53	34	34	48	41	31.8928	34.8114	No	Yes	No		P	1943	11		P	Yes	Yes						citrus
125	E	Rivnay	1941	Journal	Yes	Yes	Israel			Rehovot	previously Palestine	GoogleEarth	31	53	34	34	48	41	31.8928	34.8114	No	Yes	No		P	1943	12		H	Yes	Yes						citrus
125	E	Rivnay	1941	Journal	Yes	Yes	Israel			Rehovot	previously Palestine	GoogleEarth	31	53	34	34	48	41	31.8928	34.8114	No	Yes	No		P	1944	4		L	Yes	Yes						citrus
125	E	Rivnay	1941	Journal	Yes	Yes	Israel			Rehovot	previously Palestine	GoogleEarth	31	53	34	34	48	41	31.8928	34.8114	No	Yes	No		P	1944	5		H	Yes	Yes						citrus
125	E	Rivnay	1941	Journal	Yes	Yes	Israel			Rehovot	previously Palestine	GoogleEarth	31	53	34	34	48	41	31.8928	34.8114	No	Yes	No		P	1944	6		P	Yes	Yes						citrus
125	E	Rivnay	1941	Journal	Yes	Yes	Israel			Rehovot	previously Palestine	GoogleEarth	31	53	34	34	48	41	31.8928	34.8114	No	Yes	No		P	1944	7		P	Yes	Yes						citrus
125	E	Rivnay	1941	Journal	Yes	Yes	Israel			Rehovot	previously Palestine	GoogleEarth	31	53	34	34	48	41	31.8928	34.8114	No	Yes	No		P	1944	8		L	Yes	Yes						citrus
125	E	Rivnay	1941	Journal	Yes	Yes	Israel			Rehovot	previously Palestine	GoogleEarth	31	53	34	34	48	41	31.8928	34.8114	No	Yes	No		P	1944	9		H	Yes	Yes						citrus
125	E	Rivnay	1941	Journal	Yes	Yes	Israel			Rehovot	previously Palestine	GoogleEarth	31	53	34	34	48	41	31.8928	34.8114	No	Yes	No		P	1944	10		P	Yes	Yes						citrus
125	E	Rivnay	1941	Journal	Yes	Yes	Israel			Rehovot	previously Palestine	GoogleEarth	31	53	34	34	48	41	31.8928	34.8114	No	Yes	No		P	1944	11		M	Yes	Yes						citrus
125	E	Rivnay	1941	Journal	Yes	Yes	Israel			Rehovot	previously Palestine	GoogleEarth	31	53	34	34	48	41	31.8928	34.8114	No	Yes	No		P	1944	12		M	Yes	Yes						citrus
16	M	Bjelis	2006	Journal	Yes	Yes	Croatia			Metkovic		GoogleEarth	43	3	11	17	38	54	43.0531	17.6483	No	Yes	No		P	2002	8		M	Yes	Yes						loquat	stone fruit
16	M	Bjelis	2006	Journal	Yes	Yes	Croatia			Metkovic		GoogleEarth	43	3	11	17	38	54	43.0531	17.6483	No	Yes	No		P	2002	9		H	Yes	Yes						loquat	stone fruit
16	M	Bjelis	2006	Journal	Yes	Yes	Croatia			Metkovic		GoogleEarth	43	3	11	17	38	54	43.0531	17.6483	No	Yes	No		P	2002	10		P	Yes	Yes						loquat	stone fruit
16	M	Bjelis	2006	Journal	Yes	Yes	Croatia			Metkovic		GoogleEarth	43	3	11	17	38	54	43.0531	17.6483	No	Yes	No		P	2002	11		P	Yes	Yes						loquat	stone fruit
16	M	Bjelis	2006	Journal	Yes	Yes	Croatia			Metkovic		GoogleEarth	43	3	11	17	38	54	43.0531	17.6483	No	Yes	No		P	2002	12		H	Yes	Yes						loquat	stone fruit
16	M	Bjelis	2006	Journal	Yes	Yes	Croatia			Metkovic		GoogleEarth	43	3	11	17	38	54	43.0531	17.6483	No	Yes	No		P	2003	9		L	Yes	Yes						loquat	stone fruit
16	M	Bjelis	2006	Journal	Yes	Yes	Croatia			Metkovic		GoogleEarth	43	3	11	17	38	54	43.0531	17.6483	No	Yes	No		P	2003	10		H	Yes	Yes						loquat	stone fruit
16	M	Bjelis	2006	Journal	Yes	Yes	Croatia			Metkovic		GoogleEarth	43	3	11	17	38	54	43.0531	17.6483	No	Yes	No		P	2003	11		P	Yes	Yes						loquat	stone fruit
16	M	Bjelis	2006	Journal	Yes	Yes	Croatia			Metkovic		GoogleEarth	43	3	11	17	38	54	43.0531	17.6483	No	Yes	No		P	2003	12		H	Yes	Yes						loquat	stone fruit
16	M	Bjelis	2006	Journal	Yes	Yes	Croatia			Metkovic		GoogleEarth	43	3	11	17	38	54	43.0531	17.6483	No	Yes	No		P	2004	10		L	Yes	Yes						loquat	stone fruit
16	M	Bjelis	2006	Journal	Yes	Yes	Croatia			Metkovic		GoogleEarth	43	3	11	17	38	54	43.0531	17.6483	No	Yes	No		P	2004	11		H	Yes	Yes						loquat	stone fruit
16	M	Bjelis	2006	Journal	Yes	Yes	Croatia			Metkovic		GoogleEarth	43	3	11	17	38	54	43.0531	17.6483	No	Yes	No		P	2004	12		H	Yes	Yes						loquat	stone fruit
16	M	Bjelis	2006	Journal	Yes	Yes	Croatia			Opuzen		GoogleEarth	43	1	3	17	33	44	43.0175	17.5622	No	Yes	No		P	2002	8		L	Yes	Yes						loquat	stone fruit
16	M	Bjelis	2006	Journal	Yes	Yes	Croatia			Opuzen		GoogleEarth	43	1	3	17	33	44	43.0175	17.5622	No	Yes	No		P	2002	9		P	Yes	Yes						loquat	stone fruit
16	M	Bjelis	2006	Journal	Yes	Yes	Croatia			Opuzen		GoogleEarth	43	1	3	17	33	44	43.0175	17.5622	No	Yes	No		P	2002	10		H	Yes	Yes						loquat	stone fruit
16	M	Bjelis	2006	Journal	Yes	Yes	Croatia			Opuzen		GoogleEarth	43	1	3	17	33	44	43.0175	17.5622	No	Yes	No		P	2002	11		H	Yes	Yes						loquat	stone fruit
16	M	Bjelis	2006	Journal	Yes	Yes	Croatia			Opuzen		GoogleEarth	43	1	3	17	33	44	43.0175	17.5622	No	Yes	No		P	2002	12		H	Yes	Yes						loquat	stone fruit
16	M	Bjelis	2006	Journal	Yes	Yes	Croatia			Opuzen		GoogleEarth	43	1	3	17	33	44	43.0175	17.5622	No	Yes	No		P	2003	9		L	Yes	Yes						loquat	stone fruit
16	M	Bjelis	2006	Journal	Yes	Yes	Croatia			Opuzen		GoogleEarth	43	1	3	17	33	44	43.0175	17.5622	No	Yes	No		P	2003	10		H	Yes	Yes						loquat	stone fruit
16	M	Bjelis	2006	Journal	Yes	Yes	Croatia			Opuzen		GoogleEarth	43	1	3	17	33	44	43.0175	17.5622	No	Yes	No		P	2003	11		P	Yes	Yes						loquat	stone fruit
16	M	Bjelis	2006	Journal	Yes	Yes	Croatia			Opuzen		GoogleEarth	43	1	3	17	33	44	43.0175	17.5622	No	Yes	No		P	2003	12		P	Yes	Yes						loquat	stone fruit
16	M	Bjelis	2006	Journal	Yes	Yes	Croatia			Opuzen		GoogleEarth	43	1	3	17	33	44	43.0175	17.5622	No	Yes	No		P	2004	9		L	Yes	Yes						loquat	stone fruit
16	M	Bjelis	2006	Journal	Yes	Yes	Croatia			Opuzen		GoogleEarth	43	1	3	17	33	44	43.0175	17.5622	No	Yes	No		P	2004	10		H	Yes	Yes						loquat	stone fruit
16	M	Bjelis	2006	Journal	Yes	Yes	Croatia			Opuzen		GoogleEarth	43	1	3	17	33	44	43.0175	17.5622	No	Yes	No		P	2004	11		P	Yes	Yes						loquat	stone fruit
16	M	Bjelis	2006	Journal	Yes	Yes	Croatia			Opuzen		GoogleEarth	43	1	3	17	33	44	43.0175	17.5622	No	Yes	No		P	2004	12		P	Yes	Yes						loquat	stone fruit
16	M	Bjelis	2007	Journal	Yes	Yes	Croatia			Zupa dubrovacka		GoogleEarth	42	37	32	18	11	44	42.6256	18.1956	No	Yes	No		P	2000	8		L	Yes	Yes
16	M	Bjelis	2007	Journal	Yes	Yes	Croatia			Zupa dubrovacka		GoogleEarth	42	37	32	18	11	44	42.6256	18.1956	No	Yes	No		P	2000	9		L	Yes	Yes
16	M	Bjelis	2007	Journal	Yes	Yes	Croatia			Zupa dubrovacka		GoogleEarth	42	37	32	18	11	44	42.6256	18.1956	No	Yes	No		P	2000	10		P	Yes	Yes
16	M	Bjelis	2007	Journal	Yes	Yes	Croatia			Zupa dubrovacka		GoogleEarth	42	37	32	18	11	44	42.6256	18.1956	No	Yes	No		P	2000	11		L	Yes	Yes
16	M	Bjelis	2007	Journal	Yes	Yes	Croatia			Zupa dubrovacka		GoogleEarth	42	37	32	18	11	44	42.6256	18.1956	No	Yes	No		P	2001	7		L	Yes	Yes
16	M	Bjelis	2007	Journal	Yes	Yes	Croatia			Zupa dubrovacka		GoogleEarth	42	37	32	18	11	44	42.6256	18.1956	No	Yes	No		P	2001	8		L	Yes	Yes
16	M	Bjelis	2007	Journal	Yes	Yes	Croatia			Zupa dubrovacka		GoogleEarth	42	37	32	18	11	44	42.6256	18.1956	No	Yes	No		P	2001	9		H	Yes	Yes
16	M	Bjelis	2007	Journal	Yes	Yes	Croatia			Zupa dubrovacka		GoogleEarth	42	37	32	18	11	44	42.6256	18.1956	No	Yes	No		P	2001	10		P	Yes	Yes
16	M	Bjelis	2007	Journal	Yes	Yes	Croatia			Zupa dubrovacka		GoogleEarth	42	37	32	18	11	44	42.6256	18.1956	No	Yes	No		P	2001	11		L	Yes	Yes
16	M	Bjelis	2007	Journal	Yes	Yes	Croatia			Zupa dubrovacka		GoogleEarth	42	37	32	18	11	44	42.6256	18.1956	No	Yes	No		P	2001	12		M	Yes	Yes
16	M	Bjelis	2007	Journal	Yes	Yes	Croatia			Zupa dubrovacka		GoogleEarth	42	37	32	18	11	44	42.6256	18.1956	No	Yes	No		P	2002	7		M	Yes	Yes
16	M	Bjelis	2007	Journal	Yes	Yes	Croatia			Zupa dubrovacka		GoogleEarth	42	37	32	18	11	44	42.6256	18.1956	No	Yes	No		P	2002	8		L	Yes	Yes
16	M	Bjelis	2007	Journal	Yes	Yes	Croatia			Zupa dubrovacka		GoogleEarth	42	37	32	18	11	44	42.6256	18.1956	No	Yes	No		P	2002	9		P	Yes	Yes
16	M	Bjelis	2007	Journal	Yes	Yes	Croatia			Zupa dubrovacka		GoogleEarth	42	37	32	18	11	44	42.6256	18.1956	No	Yes	No		P	2002	10		H	Yes	Yes
16	M	Bjelis	2007	Journal	Yes	Yes	Croatia			Zupa dubrovacka		GoogleEarth	42	37	32	18	11	44	42.6256	18.1956	No	Yes	No		P	2002	11		P	Yes	Yes
16	M	Bjelis	2007	Journal	Yes	Yes	Croatia			Zupa dubrovacka		GoogleEarth	42	37	32	18	11	44	42.6256	18.1956	No	Yes	No		P	2002	12		M	Yes	Yes
16	M	Bjelis	2007	Journal	Yes	Yes	Croatia			Zupa dubrovacka		GoogleEarth	42	37	32	18	11	44	42.6256	18.1956	No	Yes	No		P	2003	9		P	Yes	Yes
16	M	Bjelis	2007	Journal	Yes	Yes	Croatia			Zupa dubrovacka		GoogleEarth	42	37	32	18	11	44	42.6256	18.1956	No	Yes	No		P	2003	10		H	Yes	Yes
16	M	Bjelis	2007	Journal	Yes	Yes	Croatia			Zupa dubrovacka		GoogleEarth	42	37	32	18	11	44	42.6256	18.1956	No	Yes	No		P	2003	11		L	Yes	Yes
16	M	Bjelis	2007	Journal	Yes	Yes	Croatia			Split		GoogleEarth	43	30	42	16	26	40	43.5117	16.4444	No	Yes	No		P	2000	9		H	Yes	Yes
16	M	Bjelis	2007	Journal	Yes	Yes	Croatia			Split		GoogleEarth	43	30	42	16	26	40	43.5117	16.4444	No	Yes	No		P	2000	10		H	Yes	Yes
16	M	Bjelis	2007	Journal	Yes	Yes	Croatia			Split		GoogleEarth	43	30	42	16	26	40	43.5117	16.4444	No	Yes	No		P	2000	11		H	Yes	Yes
16	M	Bjelis	2007	Journal	Yes	Yes	Croatia			Split		GoogleEarth	43	30	42	16	26	40	43.5117	16.4444	No	Yes	No		P	2000	12		M	Yes	Yes
16	M	Bjelis	2007	Journal	Yes	Yes	Croatia			Split		GoogleEarth	43	30	42	16	26	40	43.5117	16.4444	No	Yes	No		P	2001	9		H	Yes	Yes
16	M	Bjelis	2007	Journal	Yes	Yes	Croatia			Split		GoogleEarth	43	30	42	16	26	40	43.5117	16.4444	No	Yes	No		P	2001	10		P	Yes	Yes
16	M	Bjelis	2007	Journal	Yes	Yes	Croatia			Split		GoogleEarth	43	30	42	16	26	40	43.5117	16.4444	No	Yes	No		P	2001	11		L	Yes	Yes
16	M	Bjelis	2007	Journal	Yes	Yes	Croatia			Split		GoogleEarth	43	30	42	16	26	40	43.5117	16.4444	No	Yes	No		P	2001	12		M	Yes	Yes
16	M	Bjelis	2007	Journal	Yes	Yes	Croatia			Split		GoogleEarth	43	30	42	16	26	40	43.5117	16.4444	No	Yes	No		P	2002	9		M	Yes	Yes
16	M	Bjelis	2007	Journal	Yes	Yes	Croatia			Split		GoogleEarth	43	30	42	16	26	40	43.5117	16.4444	No	Yes	No		P	2002	10		L	Yes	Yes
16	M	Bjelis	2007	Journal	Yes	Yes	Croatia			Split		GoogleEarth	43	30	42	16	26	40	43.5117	16.4444	No	Yes	No		P	2002	11		L	Yes	Yes
16	M	Bjelis	2007	Journal	Yes	Yes	Croatia			Split		GoogleEarth	43	30	42	16	26	40	43.5117	16.4444	No	Yes	No		P	2002	12		M	Yes	Yes
16	M	Bjelis	2007	Journal	Yes	Yes	Croatia			Split		GoogleEarth	43	30	42	16	26	40	43.5117	16.4444	No	Yes	No		P	2003	9		H	Yes	Yes
16	M	Bjelis	2007	Journal	Yes	Yes	Croatia			Split		GoogleEarth	43	30	42	16	26	40	43.5117	16.4444	No	Yes	No		P	2003	10		P	Yes	Yes
16	M	Bjelis	2007	Journal	Yes	Yes	Croatia			Split		GoogleEarth	43	30	42	16	26	40	43.5117	16.4444	No	Yes	No		P	2003	11		H	Yes	Yes
16	M	Bjelis	2007	Journal	Yes	Yes	Croatia			Split		GoogleEarth	43	30	42	16	26	40	43.5117	16.4444	No	Yes	No		P	2003	12		M	Yes	Yes
16	M	Bjelis	2008	Journal	Yes	Yes	Croatia			Zupa dubrovacka		GoogleEarth	42	37	32	18	11	44	42.6256	18.1956	No	Yes	No		P	2003	6		L	Yes	Yes
16	M	Bjelis	2009	Journal	Yes	Yes	Croatia			Split		GoogleEarth	43	30	42	16	26	40	43.5117	16.4444	No	Yes	No		P	2000	6		H	Yes	Yes
44	A	El Keroumi	2010	Journal	Yes	Yes	Morocco			Boutazarte (20km south of Essaouira)		GoogleEarth	31	22	36	9	45	24	31.3767	9.75667	No	Yes	No		P	2006				Yes	Yes						woody plants	cultivated cereal
44	A	El Keroumi	2010	Journal	Yes	Yes	Morocco			Lassinate		GoogleEarth	31	29	2	9	20	41	31.4839	9.34472	No	Yes	No		P	2006				Yes	Yes						argan	olives	vines	fig	cactus
5	A	Alemany	2004	Journal	Yes	Yes	Spain	Mallorca		Fornalutx		GoogleEarth	39	46	57	2	44	29	39.7825	2.74139	No	Yes	No		P	1999	5		M	Yes	Yes						orange
5	A	Alemany	2004	Journal	Yes	Yes	Spain	Mallorca		Fornalutx		GoogleEarth	39	46	57	2	44	29	39.7825	2.74139	No	Yes	No		P	1999	6		M	Yes	Yes						orange
5	A	Alemany	2004	Journal	Yes	Yes	Spain	Mallorca		Fornalutx		GoogleEarth	39	46	57	2	44	29	39.7825	2.74139	No	Yes	No		P	1999	7		L	Yes	Yes						orange
5	A	Alemany	2004	Journal	Yes	Yes	Spain	Mallorca		Fornalutx		GoogleEarth	39	46	57	2	44	29	39.7825	2.74139	No	Yes	No		P	1999	8		H	Yes	Yes						orange
5	A	Alemany	2004	Journal	Yes	Yes	Spain	Mallorca		Fornalutx		GoogleEarth	39	46	57	2	44	29	39.7825	2.74139	No	Yes	No		P	1999	9		P	Yes	Yes						orange
5	A	Alemany	2004	Journal	Yes	Yes	Spain	Mallorca		Fornalutx		GoogleEarth	39	46	57	2	44	29	39.7825	2.74139	No	Yes	No		P	1999	10		H	Yes	Yes						orange
5	A	Alemany	2004	Journal	Yes	Yes	Spain	Mallorca		Fornalutx		GoogleEarth	39	46	57	2	44	29	39.7825	2.74139	No	Yes	No		P	1999	11		L	Yes	Yes						orange
6	M	Aluja	2005	Journal	Yes	Yes	Mexico	Veracruz		Apazapan		Source	19	19	0	-96	42	0	19.3167	-96.7	Yes	No	No		P					Yes	No						tropical plum	Spondias purpurea
6	M	Aluja	2005	Journal	Yes	Yes	Mexico	Veracruz		Llano Grande		Source	19	22	0	-96	54	0	19.3667	-96.9	Yes	No	No		P					Yes	No						tropical plum	Spondias mombin
6	M	Aluja	2005	Journal	Yes	Yes	Mexico	Veracruz		Tejeria		Source	19	22	0	-96	54	0	19.3667	-96.9	Yes	No	No		P					Yes	No						guava	Psidium guajava
20	K	Bloem	1994	Journal	Yes	Yes	Guatemala	Sacatepequez	Antigua	Finca Capetillo		GoogleEarth	14	29	44	-90	48	32	14.4956	-90.8089	No	Yes	No		P	1990	1		Low	Yes	Yes	Jackson trimedlure		McPhail trimedlure		adult
20	K	Bloem	1994	Journal	Yes	Yes	Guatemala	Sacatepequez	Antigua	Finca Capetillo		GoogleEarth	14	29	44	-90	48	32	14.4956	-90.8089	No	Yes	No		P	1990	2		Low	Yes	Yes	Jackson trimedlure		McPhail trimedlure		adult
20	K	Bloem	1994	Journal	Yes	Yes	Guatemala	Sacatepequez	Antigua	Finca Capetillo		GoogleEarth	14	29	44	-90	48	32	14.4956	-90.8089	No	Yes	No		P	1990	3		Peak	Yes	Yes	Jackson trimedlure		McPhail trimedlure		adult
20	K	Bloem	1994	Journal	Yes	Yes	Guatemala	Sacatepequez	Antigua	Finca Capetillo		GoogleEarth	14	29	44	-90	48	32	14.4956	-90.8089	No	Yes	No		P	1990	4		Peak	Yes	Yes	Jackson trimedlure		McPhail trimedlure		adult
20	K	Bloem	1994	Journal	Yes	Yes	Guatemala	Sacatepequez	Antigua	Finca Capetillo		GoogleEarth	14	29	44	-90	48	32	14.4956	-90.8089	No	Yes	No		P	1990	5		Peak	Yes	Yes	Jackson trimedlure		McPhail trimedlure		adult
20	K	Bloem	1994	Journal	Yes	Yes	Guatemala	Sacatepequez	Antigua	Finca Capetillo		GoogleEarth	14	29	44	-90	48	32	14.4956	-90.8089	No	Yes	No		P	1990	6		Low	Yes	Yes	Jackson trimedlure		McPhail trimedlure		adult
20	K	Bloem	1994	Journal	Yes	Yes	Guatemala	Sacatepequez	Antigua	Finca Capetillo		GoogleEarth	14	29	44	-90	48	32	14.4956	-90.8089	No	Yes	No		P	1990	7		Low	Yes	Yes	Jackson trimedlure		McPhail trimedlure		adult
20	K	Bloem	1994	Journal	Yes	Yes	Guatemala	Sacatepequez	Antigua	Finca Capetillo		GoogleEarth	14	29	44	-90	48	32	14.4956	-90.8089	No	Yes	No		P	1990	8		Low	Yes	Yes	Jackson trimedlure		McPhail trimedlure		adult
20	K	Bloem	1994	Journal	Yes	Yes	Guatemala	Sacatepequez	Antigua	Finca Capetillo		GoogleEarth	14	29	44	-90	48	32	14.4956	-90.8089	No	Yes	No		P	1990	9		Low	Yes	Yes	Jackson trimedlure		McPhail trimedlure		adult
20	K	Bloem	1994	Journal	Yes	Yes	Guatemala	Sacatepequez	Antigua	Finca Capetillo		GoogleEarth	14	29	44	-90	48	32	14.4956	-90.8089	No	Yes	No		P	1990	10		Low	Yes	Yes	Jackson trimedlure		McPhail trimedlure		adult
20	K	Bloem	1994	Journal	Yes	Yes	Guatemala	Sacatepequez	Antigua	Finca Capetillo		GoogleEarth	14	29	44	-90	48	32	14.4956	-90.8089	No	Yes	No		P	1990	11		Low	Yes	Yes	Jackson trimedlure		McPhail trimedlure		adult
20	K	Bloem	1994	Journal	Yes	Yes	Guatemala	Sacatepequez	Antigua	Finca Capetillo		GoogleEarth	14	29	44	-90	48	32	14.4956	-90.8089	No	Yes	No		P	1990	12		Low	Yes	Yes	Jackson trimedlure		McPhail trimedlure		adult
21	M	Bonizzoni	2004	Journal	Yes	Yes	Australia			Broome		Source	-17	58	0	122	25	0	-17.9667	122.417	No	Yes	No		P	1992	7			Yes	Yes
21	M	Bonizzoni	2004	Journal	Yes	Yes	Australia			Broome		Source	-17	58	0	122	25	0	-17.9667	122.417	No	Yes	No		P	2002	3			Yes	Yes
21	M	Bonizzoni	2004	Journal	Yes	Yes	Australia			Carnarvon		Source	-24	51	0	122	15	0	-24.85	122.25	No	Yes	No		P	2002	3			Yes	Yes
21	M	Bonizzoni	2004	Journal	Yes	Yes	Australia			Perth		Source	-31	58	0	115	49	0	-31.9667	115.817	No	Yes	No		P	2001	10			Yes	Yes
21	M	Bonizzoni	2004	Journal	Yes	Yes	Australia			Perth		Source	-31	58	0	115	49	0	-31.9667	115.817	No	Yes	No		P	2001	11			Yes	Yes
21	M	Bonizzoni	2004	Journal	Yes	Yes	Australia			Gosnells		Source	-32	5	0	116	0	0	-32.0833	116	No	Yes	No		P	2002	3			Yes	Yes
21	M	Bonizzoni	2004	Journal	Yes	Yes	Australia			Dwellingup		Source	-32	42	0	116	4	0	-32.7	116.067	No	Yes	No		P	2002	3			Yes	Yes
21	M	Bonizzoni	2004	Journal	Yes	Yes	Australia			Bunbury		Source	-32	20	0	113	45	0	-32.3333	113.75	No	Yes	No		P	1994	3			Yes	Yes
21	M	Bonizzoni	2004	Journal	Yes	Yes	Australia			Esperance		Source	-33	49	0	121	52	0	-33.8167	121.867	No	Yes	No		P	1994	3			Yes	Yes
21	M	Bonizzoni	2004	Journal	Yes	Yes	Australia			Goodwood		Source	-34	57	0	138	35	0	-34.95	138.583	No	Yes	No		P	2001	3			Yes	Yes
21	M	Bonizzoni	2004	Journal	Yes	Yes	Australia			Hyde park		Source	-34	57	0	138	36	0	-34.95	138.6	No	Yes	No		P	2001	3			Yes	Yes
21	M	Bonizzoni	2004	Journal	Yes	Yes	Australia			Glen Osmond		Source	-34	58	0	138	38	0	-34.9667	138.633	No	Yes	No		P	2001	5			Yes	Yes
21	M	Bonizzoni	2004	Journal	Yes	Yes	Australia			Millswood		Source	-34	58	0	138	35	0	-34.9667	138.583	No	Yes	No		P	2000	12			Yes	Yes
21	M	Bonizzoni	2004	Journal	Yes	Yes	Australia			Millswood		Source	-34	58	0	138	35	0	-34.9667	138.583	No	Yes	No		P	2001	1			Yes	Yes
21	M	Bonizzoni	2004	Journal	Yes	Yes	Australia			Millswood		Source	-34	58	0	138	35	0	-34.9667	138.583	No	Yes	No		P	2001	2			Yes	Yes
21	M	Bonizzoni	2004	Journal	Yes	Yes	Australia			Millswood		Source	-34	58	0	138	35	0	-34.9667	138.583	No	Yes	No		P	2001	3			Yes	Yes
21	M	Bonizzoni	2004	Journal	Yes	Yes	Australia			Millswood		Source	-34	58	0	138	35	0	-34.9667	138.583	No	Yes	No		P	2001	4			Yes	Yes
21	M	Bonizzoni	2004	Journal	Yes	Yes	Australia			Millswood		Source	-34	58	0	138	35	0	-34.9667	138.583	No	Yes	No		P	2001	5			Yes	Yes
21	M	Bonizzoni	2004	Journal	Yes	Yes	Australia			Everard Park		Source	-34	58	0	138	35	0	-34.9667	138.583	No	Yes	No		P	2000	12			Yes	Yes
21	M	Bonizzoni	2004	Journal	Yes	Yes	Australia			Davoren Park		Source	-34	45	0	138	39	0	-34.75	138.65	No	Yes	No		P	2001	4			Yes	Yes
21	M	Bonizzoni	2004	Journal	Yes	Yes	Australia			Blanche Town		Source	-34	21	0	139	30	0	-34.35	139.5	No	Yes	No		P	2001	11			Yes	Yes
21	M	Bonizzoni	2004	Journal	Yes	Yes	Australia			Salisbury Downs		Source	-34	46	0	138	39	0	-34.7667	138.65	No	Yes	No		P	2002	4			Yes	Yes
21	M	Bonizzoni	2004	Journal	Yes	Yes	Australia			Salisbury Downs		Source	-34	46	0	138	39	0	-34.7667	138.65	No	Yes	No		P	2002	5			Yes	Yes
21	M	Bonizzoni	2004	Journal	Yes	Yes	Kenya			Kungundo		Source	-1	18	0	37	21	0	-1.3	37.35	No	Yes	No		P	2002	8			Yes	Yes
21	M	Bonizzoni	2004	Journal	Yes	Yes	South Africa			Nelspruit		Source	-25	7	0	31	5	0	-25.1167	31.0833	No	Yes	No		P	2001	4			Yes	Yes
21	M	Bonizzoni	2004	Journal	Yes	Yes	Portugal			Madeira		GoogleEarth	32	44	20	17	0	44	32.7389	17.0122	No	Yes	No		P	1994	11			Yes	Yes
21	M	Bonizzoni	2004	Journal	Yes	Yes	Spain			Barcelona		Source	41	25	0	2	10	0	41.4167	2.16667	No	Yes	No		P	1994	11			Yes	Yes
21	M	Bonizzoni	2004	Journal	Yes	Yes	Greece			Chios Island		Source	38	22	0	26	0	0	38.3667	26	No	Yes	No		P	2000	4			Yes	Yes
21	M	Bonizzoni	2004	Journal	Yes	Yes	Greece			Chios Island		Source	38	22	0	26	0	0	38.3667	26	No	Yes	No		P	2000	5			Yes	Yes
21	M	Bonizzoni	2004	Journal	Yes	Yes	Greece			Chios Island		Source	38	22	0	26	0	0	38.3667	26	No	Yes	No		P	2000	6			Yes	Yes
21	M	Bonizzoni	2004	Journal	Yes	Yes	Greece			Chios Island		Source	38	22	0	26	0	0	38.3667	26	No	Yes	No		P	2000	7			Yes	Yes
21	M	Bonizzoni	2004	Journal	Yes	Yes	Greece			Chios Island		Source	38	22	0	26	0	0	38.3667	26	No	Yes	No		P	2000	8			Yes	Yes
21	M	Bonizzoni	2004	Journal	Yes	Yes	Israel			Rehovot		Source	31	54	0	34	49	0	31.9	34.8167	No	Yes	No		P	2002	4			Yes	Yes
21	M	Bonizzoni	2004	Journal	Yes	Yes	Israel			Rehovot		Source	31	54	0	34	49	0	31.9	34.8167	No	Yes	No		P	2002	5			Yes	Yes
21	M	Bonizzoni	2004	Journal	Yes	Yes	USA	Hawaii		Mauna Loa		Source	21	8	0	-157	12	0	21.1333	-157.2	No	Yes	No		P	1992	7			Yes	Yes
21	M	Bonizzoni	2004	Journal	Yes	Yes	USA	Hawaii		Kauai		Source	22	3	0	-159	30	0	22.05	-159.5	No	Yes	No		P	1992	7			Yes	Yes
24	C	Callejas	2002	Conference	Yes	Yes	Italy			Bari		GoogleEarth	41	6	41	16	52	13	41.1114	16.8703	No	Yes	No		P					Yes	No
24	C	Callejas	2002	Conference	Yes	Yes	Spain			Madrid		GoogleEarth	40	25	0	3	42	0	40.4167	3.7	No	Yes	No		P					Yes	No
24	C	Callejas	2002	Conference	Yes	Yes	Spain			Malaga		GoogleEarth	36	44	5	4	25	11	36.7347	4.41972	No	Yes	No		P					Yes	No
24	C	Callejas	2002	Conference	Yes	Yes	Spain			Menorca Island		GoogleEarth	39	56	58	4	6	37	39.9494	4.11028	No	Yes	No		P					Yes	No
24	C	Callejas	2002	Conference	Yes	Yes	France			Reunion		GoogleEarth	4	21	19	55	50	3	4.35528	55.8342	No	Yes	No		P					Yes	No
24	C	Callejas	2002	Conference	Yes	Yes	Israel			Israel		GoogleEarth	31	0	0	35	0	0	31	35	No	No	Yes		P					Yes	No
24	C	Callejas	2002	Conference	Yes	Yes	South Africa			South Africa		GoogleEarth	-30	0	0	23	0	0	-30	23	No	No	Yes		P					Yes	No
24	C	Callejas	2002	Conference	Yes	Yes	Tunisia			Tunisia		GoogleEarth	34	0	0	9	0	0	34	9	No	No	Yes		P					Yes	No
24	C	Callejas	2002	Conference	Yes	Yes	Guatemala			Guatemala		GoogleEarth	14	33	0	-90	44	0	14.55	-90.7333	No	No	Yes		P					Yes	No
24	C	Callejas	2002	Conference	Yes	Yes	USA	California		Irvine		GoogleEarth	33	41	2	-117	47	40	33.6839	-117.794	No	Yes	No		P					Yes	No
25	J	Carey	1991	Journal	Yes	Yes	USA	California		Northridge		GoogleEarth	34	14	0	-118	31	17	34.2333	-118.521	No	Yes	No		T					Yes	No
25	J	Carey	1991	Journal	Yes	Yes	USA	California		Resida		GoogleEarth							#DIV/0!	#DIV/0!	No	Yes	No		T					Yes	No
25	J	Carey	1991	Journal	Yes	Yes	USA	California		Sylmar		GoogleEarth	34	18	21	-118	27	26	34.3058	-118.457	No	Yes	No		T					Yes	No
25	J	Carey	1991	Journal	Yes	Yes	USA	California		Baldwin Park		GoogleEarth	34	5	7	-117	57	39	34.0853	-117.961	No	Yes	No	late summer and fall months	T	1981				Yes	Yes
25	J	Carey	1991	Journal	Yes	Yes	USA	California		Baldwin Park		GoogleEarth	34	5	7	-117	57	39	34.0853	-117.961	No	Yes	No	late summer and fall months	T	1989				Yes	Yes
25	J	Carey	1991	Journal	Yes	Yes	USA	California		East Los Angeles		GoogleEarth	34	1	26	-118	10	19	34.0239	-118.172	No	Yes	No	late summer and fall months	T	1987				Yes	Yes
25	J	Carey	1991	Journal	Yes	Yes	USA	California		East Los Angeles		GoogleEarth	34	1	26	-118	10	19	34.0239	-118.172	No	Yes	No	late summer and fall months	T	1989				Yes	Yes
25	J	Carey	1991	Journal	Yes	Yes	USA	California		East Los Angeles		GoogleEarth	34	1	26	-118	10	19	34.0239	-118.172	No	Yes	No	late summer and fall months	T	1990				Yes	Yes
25	J	Carey	1991	Journal	Yes	Yes	USA	California		La Puente		GoogleEarth	34	1	12	-117	56	58	34.02	-117.949	No	Yes	No	late summer and fall months	T	1981				Yes	Yes
25	J	Carey	1991	Journal	Yes	Yes	USA	California		La Puente		GoogleEarth	34	1	12	-117	56	58	34.02	-117.949	No	Yes	No	late summer and fall months	T	1989				Yes	Yes
25	J	Carey	1991	Journal	Yes	Yes	USA	California		Los Angeles		GoogleEarth	34	3	8	-118	14	37	34.0522	-118.244	No	Yes	No	late summer and fall months	T	1975				Yes	Yes
25	J	Carey	1991	Journal	Yes	Yes	USA	California		Los Angeles		GoogleEarth	34	3	8	-118	14	37	34.0522	-118.244	No	Yes	No	late summer and fall months	T	1982				Yes	Yes
25	J	Carey	1991	Journal	Yes	Yes	USA	California		Los Angeles		GoogleEarth	34	3	8	-118	14	37	34.0522	-118.244	No	Yes	No	late summer and fall months	T	1987				Yes	Yes
25	J	Carey	1991	Journal	Yes	Yes	USA	California		Los Angeles		GoogleEarth	34	3	8	-118	14	37	34.0522	-118.244	No	Yes	No	late summer and fall months	T	1988				Yes	Yes
25	J	Carey	1991	Journal	Yes	Yes	USA	California		Los Angeles		GoogleEarth	34	3	8	-118	14	37	34.0522	-118.244	No	Yes	No	late summer and fall months	T	1989				Yes	Yes
25	J	Carey	1991	Journal	Yes	Yes	USA	California		Los Angeles		GoogleEarth	34	3	8	-118	14	37	34.0522	-118.244	No	Yes	No	late summer and fall months	T	1990				Yes	Yes
25	J	Carey	1991	Journal	Yes	Yes	USA	California		Northridge		GoogleEarth	34	14	0	-118	31	17	34.2333	-118.521	No	Yes	No	late summer and fall months	T	1980				Yes	Yes		5
25	J	Carey	1991	Journal	Yes	Yes	USA	California		Northridge		GoogleEarth	34	14	0	-118	31	17	34.2333	-118.521	No	Yes	No	late summer and fall months	T	1988				Yes	Yes
25	J	Carey	1991	Journal	Yes	Yes	USA	California		Resida		GoogleEarth							#DIV/0!	#DIV/0!	No	Yes	No	late summer and fall months	T	1980				Yes	Yes
25	J	Carey	1991	Journal	Yes	Yes	USA	California		Resida		GoogleEarth							#DIV/0!	#DIV/0!	No	Yes	No	late summer and fall months	T	1988				Yes	Yes
25	J	Carey	1991	Journal	Yes	Yes	USA	California		West Covina		GoogleEarth	34	4	7	-117	56	20	34.0686	-117.939	No	Yes	No	late summer and fall months	T	1981				Yes	Yes
25	J	Carey	1991	Journal	Yes	Yes	USA	California		West Covina		GoogleEarth	34	4	7	-117	56	20	34.0686	-117.939	No	Yes	No	late summer and fall months	T	1989				Yes	Yes
25	J	Carey	1991	Journal	Yes	Yes	USA	California		West Covina		GoogleEarth	34	4	7	-117	56	20	34.0686	-117.939	No	Yes	No	late summer and fall months	T	1990				Yes	Yes
25	J	Carey	1991	Journal	Yes	Yes	USA	California		Westminster		GoogleEarth	33	45	5	-117	59	38	33.7514	-117.994	No	Yes	No	late summer and fall months	T	1987				Yes	Yes
25	J	Carey	1991	Journal	Yes	Yes	USA	California		Westminster		GoogleEarth	33	45	5	-117	59	38	33.7514	-117.994	No	Yes	No	late summer and fall months	T	1989				Yes	Yes
26	J	Carey	1996	Journal	Yes	Yes	USA	California		Culver City		GoogleEarth	34	1	16	-118	23	47	34.0211	-118.396	No	Yes	No		T	1975				No	Yes		77
26	J	Carey	1996	Journal	Yes	Yes	USA	California		Bay Area		GoogleEarth	37	20	0	-121	54	0	37.3333	-121.9	No	No	Yes		T	1975				No	Yes		0
26	J	Carey	1996	Journal	Yes	Yes	USA	California		Bay Area		GoogleEarth	37	20	0	-121	54	0	37.3333	-121.9	No	No	Yes		T	1976				No	Yes		0
26	J	Carey	1996	Journal	Yes	Yes	USA	California		Bay Area		GoogleEarth	37	20	0	-121	54	0	37.3333	-121.9	No	No	Yes		T	1977				No	Yes		0
26	J	Carey	1996	Journal	Yes	Yes	USA	California		Bay Area		GoogleEarth	37	20	0	-121	54	0	37.3333	-121.9	No	No	Yes		T	1978				No	Yes		0
26	J	Carey	1996	Journal	Yes	Yes	USA	California		Bay Area		GoogleEarth	37	20	0	-121	54	0	37.3333	-121.9	No	No	Yes		T	1979				No	Yes		0
26	J	Carey	1996	Journal	Yes	Yes	USA	California		Bay Area		GoogleEarth	37	20	0	-121	54	0	37.3333	-121.9	No	No	Yes		T	1980				Yes	Yes		195
26	J	Carey	1996	Journal	Yes	Yes	USA	California		Bay Area		GoogleEarth	37	20	0	-121	54	0	37.3333	-121.9	No	No	Yes		T	1981				Yes	Yes		146
26	J	Carey	1996	Journal	Yes	Yes	USA	California		Bay Area		GoogleEarth	37	20	0	-121	54	0	37.3333	-121.9	No	No	Yes		T	1982				Yes	Yes		1
26	J	Carey	1996	Journal	Yes	Yes	USA	California		Bay Area		GoogleEarth	37	20	0	-121	54	0	37.3333	-121.9	No	No	Yes		T	1983				No	Yes		0
26	J	Carey	1996	Journal	Yes	Yes	USA	California		Bay Area		GoogleEarth	37	20	0	-121	54	0	37.3333	-121.9	No	No	Yes		T	1984				No	Yes		0
26	J	Carey	1996	Journal	Yes	Yes	USA	California		Bay Area		GoogleEarth	37	20	0	-121	54	0	37.3333	-121.9	No	No	Yes		T	1985				No	Yes		0
26	J	Carey	1996	Journal	Yes	Yes	USA	California		Bay Area		GoogleEarth	37	20	0	-121	54	0	37.3333	-121.9	No	No	Yes		T	1986				No	Yes		0
26	J	Carey	1996	Journal	Yes	Yes	USA	California		Bay Area		GoogleEarth	37	20	0	-121	54	0	37.3333	-121.9	No	No	Yes		T	1987				No	Yes		0
26	J	Carey	1996	Journal	Yes	Yes	USA	California		Bay Area		GoogleEarth	37	20	0	-121	54	0	37.3333	-121.9	No	No	Yes		T	1988				No	Yes		0
26	J	Carey	1996	Journal	Yes	Yes	USA	California		Bay Area		GoogleEarth	37	20	0	-121	54	0	37.3333	-121.9	No	No	Yes		T	1989				Yes	Yes		25
26	J	Carey	1996	Journal	Yes	Yes	USA	California		Bay Area		GoogleEarth	37	20	0	-121	54	0	37.3333	-121.9	No	No	Yes		T	1990				No	Yes		0
26	J	Carey	1996	Journal	Yes	Yes	USA	California		Bay Area		GoogleEarth	37	20	0	-121	54	0	37.3333	-121.9	No	No	Yes		T	1991				No	Yes		0
26	J	Carey	1996	Journal	Yes	Yes	USA	California		Bay Area		GoogleEarth	37	20	0	-121	54	0	37.3333	-121.9	No	No	Yes		T	1992				Yes	Yes		139
26	J	Carey	1996	Journal	Yes	Yes	USA	California		Bay Area		GoogleEarth	37	20	0	-121	54	0	37.3333	-121.9	No	No	Yes		T	1993				No	Yes		0
26	J	Carey	1996	Journal	Yes	Yes	USA	California		Bay Area		GoogleEarth	37	20	0	-121	54	0	37.3333	-121.9	No	No	Yes		T	1994				No	Yes		0
26	J	Carey	1996	Journal	Yes	Yes	USA	California		southern California		GoogleEarth	34	0	0	-118	15	0	34	-118.25	No	No	Yes		T	1975				Yes	Yes		77
26	J	Carey	1996	Journal	Yes	Yes	USA	California		southern California		GoogleEarth	34	0	0	-118	15	0	34	-118.25	No	No	Yes		T	1976				No	Yes		0
26	J	Carey	1996	Journal	Yes	Yes	USA	California		southern California		GoogleEarth	34	0	0	-118	15	0	34	-118.25	No	No	Yes		T	1977				No	Yes		0
26	J	Carey	1996	Journal	Yes	Yes	USA	California		southern California		GoogleEarth	34	0	0	-118	15	0	34	-118.25	No	No	Yes		T	1978				No	Yes		0
26	J	Carey	1996	Journal	Yes	Yes	USA	California		southern California		GoogleEarth	34	0	0	-118	15	0	34	-118.25	No	No	Yes		T	1979				No	Yes		0
26	J	Carey	1996	Journal	Yes	Yes	USA	California		southern California		GoogleEarth	34	0	0	-118	15	0	34	-118.25	No	No	Yes		T	1980				Yes	Yes		5
26	J	Carey	1996	Journal	Yes	Yes	USA	California		southern California		GoogleEarth	34	0	0	-118	15	0	34	-118.25	No	No	Yes		T	1981				Yes	Yes		53
26	J	Carey	1996	Journal	Yes	Yes	USA	California		southern California		GoogleEarth	34	0	0	-118	15	0	34	-118.25	No	No	Yes		T	1982				Yes	Yes		1
26	J	Carey	1996	Journal	Yes	Yes	USA	California		southern California		GoogleEarth	34	0	0	-118	15	0	34	-118.25	No	No	Yes		T	1983				No	Yes		0
26	J	Carey	1996	Journal	Yes	Yes	USA	California		southern California		GoogleEarth	34	0	0	-118	15	0	34	-118.25	No	No	Yes		T	1984				Yes	Yes		1
26	J	Carey	1996	Journal	Yes	Yes	USA	California		southern California		GoogleEarth	34	0	0	-118	15	0	34	-118.25	No	No	Yes		T	1985				No	Yes		0
26	J	Carey	1996	Journal	Yes	Yes	USA	California		southern California		GoogleEarth	34	0	0	-118	15	0	34	-118.25	No	No	Yes		T	1986				Yes	Yes		1
26	J	Carey	1996	Journal	Yes	Yes	USA	California		southern California		GoogleEarth	34	0	0	-118	15	0	34	-118.25	No	No	Yes		T	1987				Yes	Yes		45
26	J	Carey	1996	Journal	Yes	Yes	USA	California		southern California		GoogleEarth	34	0	0	-118	15	0	34	-118.25	No	No	Yes		T	1988				Yes	Yes		54
26	J	Carey	1996	Journal	Yes	Yes	USA	California		southern California		GoogleEarth	34	0	0	-118	15	0	34	-118.25	No	No	Yes		T	1989				Yes	Yes		235
26	J	Carey	1996	Journal	Yes	Yes	USA	California		southern California		GoogleEarth	34	0	0	-118	15	0	34	-118.25	No	No	Yes		T	1990				Yes	Yes		45
26	J	Carey	1996	Journal	Yes	Yes	USA	California		southern California		GoogleEarth	34	0	0	-118	15	0	34	-118.25	No	No	Yes		T	1991				Yes	Yes		25
26	J	Carey	1996	Journal	Yes	Yes	USA	California		southern California		GoogleEarth	34	0	0	-118	15	0	34	-118.25	No	No	Yes		T	1992				Yes	Yes		195
26	J	Carey	1996	Journal	Yes	Yes	USA	California		southern California		GoogleEarth	34	0	0	-118	15	0	34	-118.25	No	No	Yes		T	1993				Yes	Yes		400
26	J	Carey	1996	Journal	Yes	Yes	USA	California		southern California		GoogleEarth	34	0	0	-118	15	0	34	-118.25	No	No	Yes		T	1994				Yes	Yes		68
28	J	Carey	2008	Journal	Yes	Yes	Greece	Chios Island		Chios		GoogleEarth	38	21	47	26	6	58	38.3631	26.1161	No	Yes	No		P	2003	8	4	Low	Yes	Yes	Females	25	Males	8	Adult
28	J	Carey	2008	Journal	Yes	Yes	Greece	Chios Island		Chios		GoogleEarth	38	21	47	26	6	58	38.3631	26.1161	No	Yes	No		P	2003	8	26	High	Yes	Yes	Females	84	Males	30	Adult
28	J	Carey	2008	Journal	Yes	Yes	Greece	Chios Island		Chios		GoogleEarth	38	21	47	26	6	58	38.3631	26.1161	No	Yes	No		P	2003	9	17	High	Yes	Yes	Females	42	Males	51	Adult
28	J	Carey	2008	Journal	Yes	Yes	Greece	Chios Island		Chios		GoogleEarth	38	21	47	26	6	58	38.3631	26.1161	No	Yes	No		P	2003	10	8	Peak	Yes	Yes	Females	99	Males	64	Adult
28	J	Carey	2008	Journal	Yes	Yes	Greece	Chios Island		Chios		GoogleEarth	38	21	47	26	6	58	38.3631	26.1161	No	Yes	No		P	2003	11	4	High	Yes	Yes	Females	100	Males	50	Adult
28	J	Carey	2008	Journal	Yes	Yes	Greece	Chios Island		Chios		GoogleEarth	38	21	47	26	6	58	38.3631	26.1161	No	Yes	No		P	2004	6	14	Low	Yes	Yes	Females	15	Males		Adult
28	J	Carey	2008	Journal	Yes	Yes	Greece	Chios Island		Chios		GoogleEarth	38	21	47	26	6	58	38.3631	26.1161	No	Yes	No		P	2004	6	29	Marginal	Yes	Yes	Females	4	Males		Adult
28	J	Carey	2008	Journal	Yes	Yes	Greece	Chios Island		Chios		GoogleEarth	38	21	47	26	6	58	38.3631	26.1161	No	Yes	No		P	2004	7	14	High	Yes	Yes	Females	87	Males		Adult
28	J	Carey	2008	Journal	Yes	Yes	Greece	Chios Island		Chios		GoogleEarth	38	21	47	26	6	58	38.3631	26.1161	No	Yes	No		P	2004	7	30	Low	Yes	Yes	Females	26	Males		Adult
28	J	Carey	2008	Journal	Yes	Yes	Greece	Chios Island		Chios		GoogleEarth	38	21	47	26	6	58	38.3631	26.1161	No	Yes	No		P	2004	8	17	Low	Yes	Yes	Females	11	Males		Adult
28	J	Carey	2008	Journal	Yes	Yes	Greece	Chios Island		Chios		GoogleEarth	38	21	47	26	6	58	38.3631	26.1161	No	Yes	No		P	2004	8	31	High	Yes	Yes	Females	52	Males		Adult
28	J	Carey	2008	Journal	Yes	Yes	Greece	Chios Island		Chios		GoogleEarth	38	21	47	26	6	58	38.3631	26.1161	No	Yes	No		P	2004	9	14	Peak	Yes	Yes	Females	100	Males	60	Adult
28	J	Carey	2008	Journal	Yes	Yes	Greece	Chios Island		Chios		GoogleEarth	38	21	47	26	6	58	38.3631	26.1161	No	Yes	No		P	2004	10	2	Peak	Yes	Yes	Females	100	Males	100	Adult
28	J	Carey	2008	Journal	Yes	Yes	Greece	Chios Island		Chios		GoogleEarth	38	21	47	26	6	58	38.3631	26.1161	No	Yes	No		P	2004	11	11	High	Yes	Yes	Females	100	Males	18	Adult
28	J	Carey	2008	Journal	Yes	Yes	Greece	Chios Island		Chios		GoogleEarth	38	21	47	26	6	58	38.3631	26.1161	No	Yes	No		P	2005	6	16	Low	Yes	Yes	Females	16	Males	3	Adult
28	J	Carey	2008	Journal	Yes	Yes	Greece	Chios Island		Chios		GoogleEarth	38	21	47	26	6	58	38.3631	26.1161	No	Yes	No		P	2006	6	25	Low	Yes	Yes	Females	8	Males	5	Adult
28	J	Carey	2008	Journal	Yes	Yes	Greece	Chios Island		Chios		GoogleEarth	38	21	47	26	6	58	38.3631	26.1161	No	Yes	No		P	2006	7	7	High	Yes	Yes	Females	62	Males	20	Adult
28	J	Carey	2008	Journal	Yes	Yes	Greece	Chios Island		Chios		GoogleEarth	38	21	47	26	6	58	38.3631	26.1161	No	Yes	No		P	2006	7	14	High	Yes	Yes	Females	54	Males	26	Adult
28	J	Carey	2008	Journal	Yes	Yes	Greece	Chios Island		Chios		GoogleEarth	38	21	47	26	6	58	38.3631	26.1161	No	Yes	No		P	2006	7	23	Peak	Yes	Yes	Females	195	Males	57	Adult
28	J	Carey	2008	Journal	Yes	Yes	Greece	Chios Island		Chios		GoogleEarth	38	21	47	26	6	58	38.3631	26.1161	No	Yes	No		P	2006	8	7	High	Yes	Yes	Females	126	Males	79	Adult
28	J	Carey	2008	Journal	Yes	Yes	Greece	Chios Island		Chios		GoogleEarth	38	21	47	26	6	58	38.3631	26.1161	No	Yes	No		P	2006	8	17	Peak	Yes	Yes	Females	143	Males	142	Adult
28	J	Carey	2008	Journal	Yes	Yes	Greece	Chios Island		Chios		GoogleEarth	38	21	47	26	6	58	38.3631	26.1161	No	Yes	No		P	2006	8	26	Peak	Yes	Yes	Females	183	Males	169	Adult
28	J	Carey	2008	Journal	Yes	Yes	Greece	Chios Island		Chios		GoogleEarth	38	21	47	26	6	58	38.3631	26.1161	No	Yes	No		P	2006	9	6	Peak	Yes	Yes	Females	223	Males	137	Adult
28	J	Carey	2008	Journal	Yes	Yes	Greece	Chios Island		Chios		GoogleEarth	38	21	47	26	6	58	38.3631	26.1161	No	Yes	No		P	2006	9	15	Peak	Yes	Yes	Females	268	Males	145	Adult
28	J	Carey	2008	Journal	Yes	Yes	Greece	Chios Island		Chios		GoogleEarth	38	21	47	26	6	58	38.3631	26.1161	No	Yes	No		P	2006	9	24	High	Yes	Yes	Females	189	Males	126	Adult
28	J	Carey	2008	Journal	Yes	Yes	Greece	Chios Island		Chios		GoogleEarth	38	21	47	26	6	58	38.3631	26.1161	No	Yes	No		P	2006	10	7	High	Yes	Yes	Females	145	Males	57	Adult
28	J	Carey	2008	Journal	Yes	Yes	Greece	Chios Island		Chios		GoogleEarth	38	21	47	26	6	58	38.3631	26.1161	No	Yes	No		P	2006	10	16	High	Yes	Yes	Females	103	Males	45	Adult
28	J	Carey	2008	Journal	Yes	Yes	Greece	Chios Island		Chios		GoogleEarth	38	21	47	26	6	58	38.3631	26.1161	No	Yes	No		P	2006	10	26	High	Yes	Yes	Females	88	Males	19	Adult
28	J	Carey	2008	Journal	Yes	Yes	Greece	Chios Island		Chios		GoogleEarth	38	21	47	26	6	58	38.3631	26.1161	No	Yes	No		P	2006	11	12	Marginal	Yes	Yes	Females	5	Males		Adult
34	R S	Copeland	2002	Journal	Yes	Yes	Kenya	Central		Gatamayu Forest		Source	0	58	0	36	41	0	-0.966667	36.6833	Yes	No	No		P						No
34	R S	Copeland	2002	Journal	Yes	Yes	Kenya	Central		Kikuyu Escarpment		Source	1	2	0	36	36	0	1.03333	36.6	Yes	No	No		P						No
34	R S	Copeland	2002	Journal	Yes	Yes	Kenya	Central		Nairobi		Source	1	16	0	36	49	0	1.26667	36.8167	Yes	No	No		P						No
34	R S	Copeland	2002	Journal	Yes	Yes	Kenya	Central		Ololua Forest		Source	1	22	0	36	42	0	1.36667	36.7	Yes	No	No		P						No
34	R S	Copeland	2002	Journal	Yes	Yes	Kenya	Coast		Arabuko-Sokoke Forest		Source	3	19	0	39	57	0	3.31667	39.95	Yes	No	No		P						No
34	R S	Copeland	2002	Journal	Yes	Yes	Kenya	Coast		Buda Forest		Source	4	28	0	39	24	0	4.46667	39.4	Yes	No	No		P						No
34	R S	Copeland	2002	Journal	Yes	Yes	Kenya	Coast		Diani Forest		Source	4	20	0	39	34	0	4.33333	39.5667	Yes	No	No		P						No
34	R S	Copeland	2002	Journal	Yes	Yes	Kenya	Coast		Gede Forest		Source	3	19	0	40	1	0	3.31667	40.0167	Yes	No	No		P						No
34	R S	Copeland	2002	Journal	Yes	Yes	Kenya	Coast		Gongoni Forest		Source	4	24	0	39	28	0	4.4	39.4667	Yes	No	No		P						No
34	R S	Copeland	2002	Journal	Yes	Yes	Kenya	Coast		Kaya Kinondo		Source	4	24	0	39	33	0	4.4	39.55	Yes	No	No		P						No
34	R S	Copeland	2002	Journal	Yes	Yes	Kenya	Coast		Mrima Hill		Source	4	29	0	39	15	0	4.48333	39.25	Yes	No	No		P						No
34	R S	Copeland	2002	Journal	Yes	Yes	Kenya	Coast		Subaki dunes		Source	4	20	0	39	32	0	4.33333	39.5333	Yes	No	No		P						No
34	R S	Copeland	2002	Journal	Yes	Yes	Kenya	Coast		Muhaka Forest		Source	3	9	0	40	8	0	3.15	40.1333	Yes	No	No		P						No
34	R S	Copeland	2002	Journal	Yes	Yes	Kenya	Coast		Shimba Hills		Source	4	13	0	39	25	0	4.21667	39.4167	Yes	No	No		P						No
34	R S	Copeland	2002	Journal	Yes	Yes	Kenya	Coast		Watamu		Source	3	21	0	40	2	0	3.35	40.0333	Yes	No	No		P						No
34	R S	Copeland	2002	Journal	Yes	Yes	Kenya	Eastern		Kibwesi Firest		Source	2	26	0	37	56	0	2.43333	37.9333	Yes	No	No		P						No
34	R S	Copeland	2002	Journal	Yes	Yes	Kenya	Eastern		Tsavo bushland		Source	2	39	0	38	22	0	2.65	38.3667	Yes	No	No		P						No
34	R S	Copeland	2002	Journal	Yes	Yes	Kenya	Western		Kakamega Forest		Source	0	14	0	34	52	0	0.233333	34.8667	Yes	No	No		P						No
34	R S	Copeland	2002	Journal	Yes	Yes	Kenya	Nyanza		Koru		Source	0	8	0	35	16	0	-0.133333	35.2667	Yes	No	No		P						No						Prunus persica
40	A D	Diamantidis	2011	Journal	Yes	Yes	Portugal	Madeira		Madeira		Source							32.74	-16.98	Yes	No	No		P						No						Coffea arabica
40	A D	Diamantidis	2011	Journal	Yes	Yes	Kenya			Nairobi		Source							-1.27	36.8	Yes	No	No		P						No						Citrus aurantium
40	A D	Diamantidis	2011	Journal	Yes	Yes	Greece			Chios		Source							38.47	25.99	Yes	No	No		P						No						Coffea arabica
40	A D	Diamantidis	2011	Journal	Yes	Yes	Guatemala			Antigua		Source							14.56	-90.74	Yes	No	No		P						No						Coffea arabica
40	A D	Diamantidis	2011	Journal	Yes	Yes	USA	Hawaii		Kauai		Source							22.03	-159.32	Yes	No	No		P						No
41	B C	Dominiak	2011	Journal	Yes	Yes	Australia	Western Australia		Broome		GoogleEarth	-17	57	16	122	13	20	-17.9544	122.222	No	No	Yes		P						No
41	B C	Dominiak	2011	Journal	Yes	Yes	Australia	Western Australia		Carnavon		GoogleEarth	-24	53	9	113	40	56	-24.8858	113.682	No	No	Yes		P						No
41	B C	Dominiak	2011	Journal	Yes	Yes	Australia	Western Australia		Geraldton		GoogleEarth	-28	46	54	114	37	8	-28.7817	114.619	No	No	Yes		P						No
41	B C	Dominiak	2011	Journal	Yes	Yes	Australia	Western Australia		Clarkson		GoogleEarth	-31	42	19	115	44	30	-31.7053	115.742	No	No	Yes		P						No
41	B C	Dominiak	2011	Journal	Yes	Yes	Australia	Western Australia		Perth		GoogleEarth	-31	57	10	115	51	27	-31.9528	115.857	No	No	Yes		P						No
41	B C	Dominiak	2011	Journal	Yes	Yes	Australia	Western Australia		Augusta		GoogleEarth	-34	18	45	115	9	17	-34.3125	115.155	No	No	Yes		P						No
41	B C	Dominiak	2011	Journal	Yes	Yes	Australia	Western Australia		Busselton		GoogleEarth	-33	39	35	115	20	59	-33.6597	115.35	No	No	Yes		P						No
41	B C	Dominiak	2011	Journal	Yes	Yes	Australia	Western Australia		William Bay		GoogleEarth	-34	59	38	117	12	2	-34.9939	117.201	No	No	Yes		P						No
41	B C	Dominiak	2011	Journal	Yes	Yes	Australia	South Australia		South Australia		GoogleEarth	-30	0	0	136	12	0	-30	136.2	No	No	Yes		A						No
41	B C	Dominiak	2011	Journal	Yes	Yes	Australia	Northern Territory		Alice Springs	occasional incursions	GoogleEarth	-23	42	0	133	52	50	-23.7	133.881	No	No	Yes		H						No
41	B C	Dominiak	2011	Journal	Yes	Yes	Australia	Northern Territory		Darwin	occasional incursions	GoogleEarth	-12	27	9	130	50	23	-12.4525	130.84	No	No	Yes		H						No
41	B C	Dominiak	2011	Journal	Yes	Yes	Australia	Queensland		Queensland	no confirmed detections of Medfly	GoogleEarth	-20	55	3	142	42	10	-20.9175	142.703	No	No	Yes		A						No
41	B C	Dominiak	2011	Journal	Yes	Yes	Australia	New South Wales		New South Wales	detected in Sydney in 1898, last report from 1941	GoogleEarth	-31	15	11	146	55	15	-31.2531	146.921	No	No	Yes		H						No
41	B C	Dominiak	2011	Journal	Yes	Yes	Australia	Victoria		Victoria		GoogleEarth	-37	28	16	144	47	6	-37.4711	144.785	No	No	Yes		A						No
41	B C	Dominiak	2011	Journal	Yes	Yes	Australia	Tasmania		Tasmania	occasional incursions	GoogleEarth	-41	26	13	147	8	21	-41.4369	147.139	No	No	Yes		T						No
42	P F	Duyck	2006	Journal	Yes	Yes	France	La Reunion		Saint Denis		GoogleEarth	-20	52	55	55	27	3	-20.8819	55.4508	No	Yes	No		P						No
42	P F	Duyck	2006	Journal	Yes	Yes	France	La Reunion		Saint Paul		GoogleEarth	-21	0	49	55	16	12	-21.0136	55.27	No	Yes	No		P						No
42	P F	Duyck	2006	Journal	Yes	Yes	France	La Reunion		Saint Leu		GoogleEarth	-21	10	25	55	17	25	-21.1736	55.2903	No	Yes	No		P						No
42	P F	Duyck	2006	Journal	Yes	Yes	France	La Reunion		Saint Louis		GoogleEarth	-21	17	20	55	24	35	-21.2889	55.4097	No	Yes	No		P						No
9	L	Augler		Report	Yes	Yes	Argentina	Tucuman		El Rodeo		GoogleEarth	-26	38	10	-64	54	27	-26.6361	-64.9075	No	Yes	No		P	2004	5		None	No	Yes	Jackson trap baited with food				Adult
9	L	Augler		Report	Yes	Yes	Argentina	Tucuman		El Rodeo		GoogleEarth	-26	38	10	-64	54	27	-26.6361	-64.9075	No	Yes	No		P	2004	6		None	No	Yes	Jackson trap baited with food				Adult
9	L	Augler		Report	Yes	Yes	Argentina	Tucuman		El Rodeo		GoogleEarth	-26	38	10	-64	54	27	-26.6361	-64.9075	No	Yes	No		P	2004	7		None	No	Yes	Jackson trap baited with food				Adult
9	L	Augler		Report	Yes	Yes	Argentina	Tucuman		El Rodeo		GoogleEarth	-26	38	10	-64	54	27	-26.6361	-64.9075	No	Yes	No		P	2004	8		None	No	Yes	Jackson trap baited with food				Adult
9	L	Augler		Report	Yes	Yes	Argentina	Tucuman		El Rodeo		GoogleEarth	-26	38	10	-64	54	27	-26.6361	-64.9075	No	Yes	No		P	2004	9		None	No	Yes	Jackson trap baited with food				Adult
9	L	Augler		Report	Yes	Yes	Argentina	Tucuman		El Rodeo		GoogleEarth	-26	38	10	-64	54	27	-26.6361	-64.9075	No	Yes	No		P	2004	10		None	No	Yes	Jackson trap baited with food				Adult
9	L	Augler		Report	Yes	Yes	Argentina	Tucuman		El Rodeo		GoogleEarth	-26	38	10	-64	54	27	-26.6361	-64.9075	No	Yes	No		P	2004	11		None	No	Yes	Jackson trap baited with food				Adult
9	L	Augler		Report	Yes	Yes	Argentina	Tucuman		El Rodeo		GoogleEarth	-26	38	10	-64	54	27	-26.6361	-64.9075	No	Yes	No		P	2004	12		None	No	Yes	Jackson trap baited with food				Adult
9	L	Augler		Report	Yes	Yes	Argentina	Tucuman		Los Nogales		GoogleEarth	-26	49	16	-65	12	33	-26.8211	-65.2092	No	Yes	No		P	2004	5		None	No	Yes	Jackson trap baited with food				Adult
9	L	Augler		Report	Yes	Yes	Argentina	Tucuman		Los Nogales		GoogleEarth	-26	49	16	-65	12	33	-26.8211	-65.2092	No	Yes	No		P	2004	6		None	No	Yes	Jackson trap baited with food				Adult
9	L	Augler		Report	Yes	Yes	Argentina	Tucuman		Los Nogales		GoogleEarth	-26	49	16	-65	12	33	-26.8211	-65.2092	No	Yes	No		P	2004	7		None	No	Yes	Jackson trap baited with food				Adult
9	L	Augler		Report	Yes	Yes	Argentina	Tucuman		Los Nogales		GoogleEarth	-26	49	16	-65	12	33	-26.8211	-65.2092	No	Yes	No		P	2004	8		None	No	Yes	Jackson trap baited with food				Adult
9	L	Augler		Report	Yes	Yes	Argentina	Tucuman		Los Nogales		GoogleEarth	-26	49	16	-65	12	33	-26.8211	-65.2092	No	Yes	No		P	2004	9		None	No	Yes	Jackson trap baited with food				Adult
9	L	Augler		Report	Yes	Yes	Argentina	Tucuman		Los Nogales		GoogleEarth	-26	49	16	-65	12	33	-26.8211	-65.2092	No	Yes	No		P	2004	10		None	No	Yes	Jackson trap baited with food				Adult
9	L	Augler		Report	Yes	Yes	Argentina	Tucuman		Los Nogales		GoogleEarth	-26	49	16	-65	12	33	-26.8211	-65.2092	No	Yes	No		P	2004	11		None	No	Yes	Jackson trap baited with food				Adult
9	L	Augler		Report	Yes	Yes	Argentina	Tucuman		Los Nogales		GoogleEarth	-26	49	16	-65	12	33	-26.8211	-65.2092	No	Yes	No		P	2004	12		None	No	Yes	Jackson trap baited with food				Adult
9	L	Augler		Report	Yes	Yes	Argentina	Tucuman		Famailla		GoogleEarth	-27	3	22	-65	24	8	-27.0561	-65.4022	No	Yes	No		P	2004	5		None	No	Yes	Jackson trap baited with food				Adult
9	L	Augler		Report	Yes	Yes	Argentina	Tucuman		Famailla		GoogleEarth	-27	3	22	-65	24	8	-27.0561	-65.4022	No	Yes	No		P	2004	6		None	No	Yes	Jackson trap baited with food				Adult
9	L	Augler		Report	Yes	Yes	Argentina	Tucuman		Famailla		GoogleEarth	-27	3	22	-65	24	8	-27.0561	-65.4022	No	Yes	No		P	2004	7		Marginal	Yes	Yes	Jackson trap baited with food				Adult
9	L	Augler		Report	Yes	Yes	Argentina	Tucuman		Famailla		GoogleEarth	-27	3	22	-65	24	8	-27.0561	-65.4022	No	Yes	No		P	2004	8		None	No	Yes	Jackson trap baited with food				Adult
9	L	Augler		Report	Yes	Yes	Argentina	Tucuman		Famailla		GoogleEarth	-27	3	22	-65	24	8	-27.0561	-65.4022	No	Yes	No		P	2004	9		None	No	Yes	Jackson trap baited with food				Adult
9	L	Augler		Report	Yes	Yes	Argentina	Tucuman		Famailla		GoogleEarth	-27	3	22	-65	24	8	-27.0561	-65.4022	No	Yes	No		P	2004	10		None	No	Yes	Jackson trap baited with food				Adult
9	L	Augler		Report	Yes	Yes	Argentina	Tucuman		Famailla		GoogleEarth	-27	3	22	-65	24	8	-27.0561	-65.4022	No	Yes	No		P	2004	11		Peak	Yes	Yes	Jackson trap baited with food				Adult
9	L	Augler		Report	Yes	Yes	Argentina	Tucuman		Famailla		GoogleEarth	-27	3	22	-65	24	8	-27.0561	-65.4022	No	Yes	No		P	2004	12		High	Yes	Yes	Jackson trap baited with food				Adult
9	L	Augler		Report	Yes	Yes	Argentina	Tucuman		Monte Bello		GoogleEarth	-27	21	59	-65	45	1	-27.3664	-65.7503	No	Yes	No		P	2004	5		None	No	Yes	Jackson trap baited with food				Adult
9	L	Augler		Report	Yes	Yes	Argentina	Tucuman		Monte Bello		GoogleEarth	-27	21	59	-65	45	1	-27.3664	-65.7503	No	Yes	No		P	2004	6		None	No	Yes	Jackson trap baited with food				Adult
9	L	Augler		Report	Yes	Yes	Argentina	Tucuman		Monte Bello		GoogleEarth	-27	21	59	-65	45	1	-27.3664	-65.7503	No	Yes	No		P	2004	7		None	No	Yes	Jackson trap baited with food				Adult
9	L	Augler		Report	Yes	Yes	Argentina	Tucuman		Monte Bello		GoogleEarth	-27	21	59	-65	45	1	-27.3664	-65.7503	No	Yes	No		P	2004	8		None	No	Yes	Jackson trap baited with food				Adult
9	L	Augler		Report	Yes	Yes	Argentina	Tucuman		Monte Bello		GoogleEarth	-27	21	59	-65	45	1	-27.3664	-65.7503	No	Yes	No		P	2004	9		None	No	Yes	Jackson trap baited with food				Adult
9	L	Augler		Report	Yes	Yes	Argentina	Tucuman		Monte Bello		GoogleEarth	-27	21	59	-65	45	1	-27.3664	-65.7503	No	Yes	No		P	2004	10		None	No	Yes	Jackson trap baited with food				Adult
9	L	Augler		Report	Yes	Yes	Argentina	Tucuman		Monte Bello		GoogleEarth	-27	21	59	-65	45	1	-27.3664	-65.7503	No	Yes	No		P	2004	11		Low	Yes	Yes	Jackson trap baited with food				Adult
9	L	Augler		Report	Yes	Yes	Argentina	Tucuman		Monte Bello		GoogleEarth	-27	21	59	-65	45	1	-27.3664	-65.7503	No	Yes	No		P	2004	12		Peak	Yes	Yes	Jackson trap baited with food				Adult
9	L	Augler		Report	Yes	Yes	Argentina	Tucuman		El Rodeo		GoogleEarth	-26	38	10	-64	54	27	-26.6361	-64.9075	No	Yes	No		P	2005	1		None	No	Yes	Jackson trap baited with food				Adult
9	L	Augler		Report	Yes	Yes	Argentina	Tucuman		El Rodeo		GoogleEarth	-26	38	10	-64	54	27	-26.6361	-64.9075	No	Yes	No		P	2005	2		None	No	Yes	Jackson trap baited with food				Adult
9	L	Augler		Report	Yes	Yes	Argentina	Tucuman		El Rodeo		GoogleEarth	-26	38	10	-64	54	27	-26.6361	-64.9075	No	Yes	No		P	2005	3		Peak	Yes	Yes	Jackson trap baited with food				Adult
9	L	Augler		Report	Yes	Yes	Argentina	Tucuman		El Rodeo		GoogleEarth	-26	38	10	-64	54	27	-26.6361	-64.9075	No	Yes	No		P	2005	4		Low	Yes	Yes	Jackson trap baited with food				Adult
9	L	Augler		Report	Yes	Yes	Argentina	Tucuman		El Rodeo		GoogleEarth	-26	38	10	-64	54	27	-26.6361	-64.9075	No	Yes	No		P	2005	5		None	No	Yes	Jackson trap baited with food				Adult
9	L	Augler		Report	Yes	Yes	Argentina	Tucuman		El Rodeo		GoogleEarth	-26	38	10	-64	54	27	-26.6361	-64.9075	No	Yes	No		P	2005	6		None	No	Yes	Jackson trap baited with food				Adult
9	L	Augler		Report	Yes	Yes	Argentina	Tucuman		El Rodeo		GoogleEarth	-26	38	10	-64	54	27	-26.6361	-64.9075	No	Yes	No		P	2005	7		None	No	Yes	Jackson trap baited with food				Adult
9	L	Augler		Report	Yes	Yes	Argentina	Tucuman		El Rodeo		GoogleEarth	-26	38	10	-64	54	27	-26.6361	-64.9075	No	Yes	No		P	2005	8		None	No	Yes	Jackson trap baited with food				Adult
9	L	Augler		Report	Yes	Yes	Argentina	Tucuman		El Rodeo		GoogleEarth	-26	38	10	-64	54	27	-26.6361	-64.9075	No	Yes	No		P	2005	9		None	No	Yes	Jackson trap baited with food				Adult
9	L	Augler		Report	Yes	Yes	Argentina	Tucuman		El Rodeo		GoogleEarth	-26	38	10	-64	54	27	-26.6361	-64.9075	No	Yes	No		P	2005	10		None	No	Yes	Jackson trap baited with food				Adult
9	L	Augler		Report	Yes	Yes	Argentina	Tucuman		El Rodeo		GoogleEarth	-26	38	10	-64	54	27	-26.6361	-64.9075	No	Yes	No		P	2005	11		None	No	Yes	Jackson trap baited with food				Adult
9	L	Augler		Report	Yes	Yes	Argentina	Tucuman		El Rodeo		GoogleEarth	-26	38	10	-64	54	27	-26.6361	-64.9075	No	Yes	No		P	2005	12		Low	Yes	Yes	Jackson trap baited with food				Adult
9	L	Augler		Report	Yes	Yes	Argentina	Tucuman		Los Nogales		GoogleEarth	-26	49	16	-65	12	33	-26.8211	-65.2092	No	Yes	No		P	2005	1		Low	Yes	Yes	Jackson trap baited with food				Adult
9	L	Augler		Report	Yes	Yes	Argentina	Tucuman		Los Nogales		GoogleEarth	-26	49	16	-65	12	33	-26.8211	-65.2092	No	Yes	No		P	2005	2		Low	Yes	Yes	Jackson trap baited with food				Adult
9	L	Augler		Report	Yes	Yes	Argentina	Tucuman		Los Nogales		GoogleEarth	-26	49	16	-65	12	33	-26.8211	-65.2092	No	Yes	No		P	2005	3		Low	Yes	Yes	Jackson trap baited with food				Adult
9	L	Augler		Report	Yes	Yes	Argentina	Tucuman		Los Nogales		GoogleEarth	-26	49	16	-65	12	33	-26.8211	-65.2092	No	Yes	No		P	2005	4		None	No	Yes	Jackson trap baited with food				Adult
9	L	Augler		Report	Yes	Yes	Argentina	Tucuman		Los Nogales		GoogleEarth	-26	49	16	-65	12	33	-26.8211	-65.2092	No	Yes	No		P	2005	5		None	No	Yes	Jackson trap baited with food				Adult
9	L	Augler		Report	Yes	Yes	Argentina	Tucuman		Los Nogales		GoogleEarth	-26	49	16	-65	12	33	-26.8211	-65.2092	No	Yes	No		P	2005	6		None	No	Yes	Jackson trap baited with food				Adult
9	L	Augler		Report	Yes	Yes	Argentina	Tucuman		Los Nogales		GoogleEarth	-26	49	16	-65	12	33	-26.8211	-65.2092	No	Yes	No		P	2005	7		None	No	Yes	Jackson trap baited with food				Adult
9	L	Augler		Report	Yes	Yes	Argentina	Tucuman		Los Nogales		GoogleEarth	-26	49	16	-65	12	33	-26.8211	-65.2092	No	Yes	No		P	2005	8		None	No	Yes	Jackson trap baited with food				Adult
9	L	Augler		Report	Yes	Yes	Argentina	Tucuman		Los Nogales		GoogleEarth	-26	49	16	-65	12	33	-26.8211	-65.2092	No	Yes	No		P	2005	9		None	No	Yes	Jackson trap baited with food				Adult
9	L	Augler		Report	Yes	Yes	Argentina	Tucuman		Los Nogales		GoogleEarth	-26	49	16	-65	12	33	-26.8211	-65.2092	No	Yes	No		P	2005	10		None	No	Yes	Jackson trap baited with food				Adult
9	L	Augler		Report	Yes	Yes	Argentina	Tucuman		Los Nogales		GoogleEarth	-26	49	16	-65	12	33	-26.8211	-65.2092	No	Yes	No		P	2005	11		Low	Yes	Yes	Jackson trap baited with food				Adult
9	L	Augler		Report	Yes	Yes	Argentina	Tucuman		Los Nogales		GoogleEarth	-26	49	16	-65	12	33	-26.8211	-65.2092	No	Yes	No		P	2005	12		Low	Yes	Yes	Jackson trap baited with food				Adult
9	L	Augler		Report	Yes	Yes	Argentina	Tucuman		Famailla		GoogleEarth	-27	3	22	-65	24	8	-27.0561	-65.4022	No	Yes	No		P	2005	1		Peak	Yes	Yes	Jackson trap baited with food				Adult
9	L	Augler		Report	Yes	Yes	Argentina	Tucuman		Famailla		GoogleEarth	-27	3	22	-65	24	8	-27.0561	-65.4022	No	Yes	No		P	2005	2		Marginal	Yes	Yes	Jackson trap baited with food				Adult
9	L	Augler		Report	Yes	Yes	Argentina	Tucuman		Famailla		GoogleEarth	-27	3	22	-65	24	8	-27.0561	-65.4022	No	Yes	No		P	2005	3		None	No	Yes	Jackson trap baited with food				Adult
9	L	Augler		Report	Yes	Yes	Argentina	Tucuman		Famailla		GoogleEarth	-27	3	22	-65	24	8	-27.0561	-65.4022	No	Yes	No		P	2005	4		None	No	Yes	Jackson trap baited with food				Adult
9	L	Augler		Report	Yes	Yes	Argentina	Tucuman		Famailla		GoogleEarth	-27	3	22	-65	24	8	-27.0561	-65.4022	No	Yes	No		P	2005	5		None	No	Yes	Jackson trap baited with food				Adult
9	L	Augler		Report	Yes	Yes	Argentina	Tucuman		Famailla		GoogleEarth	-27	3	22	-65	24	8	-27.0561	-65.4022	No	Yes	No		P	2005	6		None	No	Yes	Jackson trap baited with food				Adult
9	L	Augler		Report	Yes	Yes	Argentina	Tucuman		Famailla		GoogleEarth	-27	3	22	-65	24	8	-27.0561	-65.4022	No	Yes	No		P	2005	7		None	No	Yes	Jackson trap baited with food				Adult
9	L	Augler		Report	Yes	Yes	Argentina	Tucuman		Famailla		GoogleEarth	-27	3	22	-65	24	8	-27.0561	-65.4022	No	Yes	No		P	2005	8		None	No	Yes	Jackson trap baited with food				Adult
9	L	Augler		Report	Yes	Yes	Argentina	Tucuman		Famailla		GoogleEarth	-27	3	22	-65	24	8	-27.0561	-65.4022	No	Yes	No		P	2005	9		None	No	Yes	Jackson trap baited with food				Adult
9	L	Augler		Report	Yes	Yes	Argentina	Tucuman		Famailla		GoogleEarth	-27	3	22	-65	24	8	-27.0561	-65.4022	No	Yes	No		P	2005	10		None	No	Yes	Jackson trap baited with food				Adult
9	L	Augler		Report	Yes	Yes	Argentina	Tucuman		Famailla		GoogleEarth	-27	3	22	-65	24	8	-27.0561	-65.4022	No	Yes	No		P	2005	11		Low	Yes	Yes	Jackson trap baited with food				Adult
9	L	Augler		Report	Yes	Yes	Argentina	Tucuman		Famailla		GoogleEarth	-27	3	22	-65	24	8	-27.0561	-65.4022	No	Yes	No		P	2005	12		High	Yes	Yes	Jackson trap baited with food				Adult
9	L	Augler		Report	Yes	Yes	Argentina	Tucuman		Monte Bello		GoogleEarth	-27	21	59	-65	45	1	-27.3664	-65.7503	No	Yes	No		P	2005	1		High	Yes	Yes	Jackson trap baited with food				Adult
9	L	Augler		Report	Yes	Yes	Argentina	Tucuman		Monte Bello		GoogleEarth	-27	21	59	-65	45	1	-27.3664	-65.7503	No	Yes	No		P	2005	2		High	Yes	Yes	Jackson trap baited with food				Adult
9	L	Augler		Report	Yes	Yes	Argentina	Tucuman		Monte Bello		GoogleEarth	-27	21	59	-65	45	1	-27.3664	-65.7503	No	Yes	No		P	2005	3		Peak	Yes	Yes	Jackson trap baited with food				Adult
9	L	Augler		Report	Yes	Yes	Argentina	Tucuman		Monte Bello		GoogleEarth	-27	21	59	-65	45	1	-27.3664	-65.7503	No	Yes	No		P	2005	4		High	Yes	Yes	Jackson trap baited with food				Adult
9	L	Augler		Report	Yes	Yes	Argentina	Tucuman		Monte Bello		GoogleEarth	-27	21	59	-65	45	1	-27.3664	-65.7503	No	Yes	No		P	2005	5		Low	Yes	Yes	Jackson trap baited with food				Adult
9	L	Augler		Report	Yes	Yes	Argentina	Tucuman		Monte Bello		GoogleEarth	-27	21	59	-65	45	1	-27.3664	-65.7503	No	Yes	No		P	2005	6		None	No	Yes	Jackson trap baited with food				Adult
9	L	Augler		Report	Yes	Yes	Argentina	Tucuman		Monte Bello		GoogleEarth	-27	21	59	-65	45	1	-27.3664	-65.7503	No	Yes	No		P	2005	7		None	No	Yes	Jackson trap baited with food				Adult
9	L	Augler		Report	Yes	Yes	Argentina	Tucuman		Monte Bello		GoogleEarth	-27	21	59	-65	45	1	-27.3664	-65.7503	No	Yes	No		P	2005	8		None	No	Yes	Jackson trap baited with food				Adult
9	L	Augler		Report	Yes	Yes	Argentina	Tucuman		Monte Bello		GoogleEarth	-27	21	59	-65	45	1	-27.3664	-65.7503	No	Yes	No		P	2005	9		None	No	Yes	Jackson trap baited with food				Adult
9	L	Augler		Report	Yes	Yes	Argentina	Tucuman		Monte Bello		GoogleEarth	-27	21	59	-65	45	1	-27.3664	-65.7503	No	Yes	No		P	2005	10		Marginal	Yes	Yes	Jackson trap baited with food				Adult
9	L	Augler		Report	Yes	Yes	Argentina	Tucuman		Monte Bello		GoogleEarth	-27	21	59	-65	45	1	-27.3664	-65.7503	No	Yes	No		P	2005	11		None	No	Yes	Jackson trap baited with food				Adult
9	L	Augler		Report	Yes	Yes	Argentina	Tucuman		Monte Bello		GoogleEarth	-27	21	59	-65	45	1	-27.3664	-65.7503	No	Yes	No		P	2005	12		Low	Yes	Yes	Jackson trap baited with food				Adult
47	L A	Escudero-Colomar	2008	Journal	Yes	Yes	Spain	Girona		NE Girona		Source	42	0	0	3	0	0	42	3	Yes	No	No		P	2005	5		None	No	Yes	Maxitrap baited with food	0			Adult	peach
47	L A	Escudero-Colomar	2008	Journal	Yes	Yes	Spain	Girona		NE Girona		Source	42	0	0	3	0	0	42	3	Yes	No	No		P	2005	6		None	No	Yes	Maxitrap baited with food	0			Adult	peach
47	L A	Escudero-Colomar	2008	Journal	Yes	Yes	Spain	Girona		NE Girona		Source	42	0	0	3	0	0	42	3	Yes	No	No		P	2005	7		None	No	Yes	Maxitrap baited with food	0			Adult	peach
47	L A	Escudero-Colomar	2008	Journal	Yes	Yes	Spain	Girona		NE Girona		Source	42	0	0	3	0	0	42	3	Yes	No	No		P	2005	8		Marginal	Yes	Yes	Maxitrap baited with food	1			Adult	peach
47	L A	Escudero-Colomar	2008	Journal	Yes	Yes	Spain	Girona		NE Girona		Source	42	0	0	3	0	0	42	3	Yes	No	No		P	2005	9		Low	Yes	Yes	Maxitrap baited with food	1			Adult	peach
47	L A	Escudero-Colomar	2008	Journal	Yes	Yes	Spain	Girona		NE Girona		Source	42	0	0	3	0	0	42	3	Yes	No	No		P	2005	10		Low	Yes	Yes	Maxitrap baited with food	1			Adult	peach
47	L A	Escudero-Colomar	2008	Journal	Yes	Yes	Spain	Girona		NE Girona		Source	42	0	0	3	0	0	42	3	Yes	No	No		P	2005	11		None	No	Yes	Maxitrap baited with food	0			Adult	peach
47	L A	Escudero-Colomar	2008	Journal	Yes	Yes	Spain	Girona		NE Girona		Source	42	0	0	3	0	0	42	3	Yes	No	No		P	2005	12		None	No	Yes	Maxitrap baited with food	0			Adult	peach
47	L A	Escudero-Colomar	2008	Journal	Yes	Yes	Spain	Girona		NE Girona		Source	42	0	0	3	0	0	42	3	Yes	No	No		P	2006	1		None	No	Yes	Maxitrap baited with food	0			Adult	peach
47	L A	Escudero-Colomar	2008	Journal	Yes	Yes	Spain	Girona		NE Girona		Source	42	0	0	3	0	0	42	3	Yes	No	No		P	2006	5		Marginal	Yes	Yes	Maxitrap baited with food	0			Adult	peach
47	L A	Escudero-Colomar	2008	Journal	Yes	Yes	Spain	Girona		NE Girona		Source	42	0	0	3	0	0	42	3	Yes	No	No		P	2006	6		Marginal	Yes	Yes	Maxitrap baited with food	0			Adult	peach
47	L A	Escudero-Colomar	2008	Journal	Yes	Yes	Spain	Girona		NE Girona		Source	42	0	0	3	0	0	42	3	Yes	No	No		P	2006	7		Marginal	Yes	Yes	Maxitrap baited with food	0			Adult	peach
47	L A	Escudero-Colomar	2008	Journal	Yes	Yes	Spain	Girona		NE Girona		Source	42	0	0	3	0	0	42	3	Yes	No	No		P	2006	8		Low	Yes	Yes	Maxitrap baited with food	2			Adult	peach
47	L A	Escudero-Colomar	2008	Journal	Yes	Yes	Spain	Girona		NE Girona		Source	42	0	0	3	0	0	42	3	Yes	No	No		P	2006	9		High	Yes	Yes	Maxitrap baited with food	8			Adult	peach
47	L A	Escudero-Colomar	2008	Journal	Yes	Yes	Spain	Girona		NE Girona		Source	42	0	0	3	0	0	42	3	Yes	No	No		P	2006	10		Peak	Yes	Yes	Maxitrap baited with food	9			Adult	peach
47	L A	Escudero-Colomar	2008	Journal	Yes	Yes	Spain	Girona		NE Girona		Source	42	0	0	3	0	0	42	3	Yes	No	No		P	2006	11		High	Yes	Yes	Maxitrap baited with food	6			Adult	peach
47	L A	Escudero-Colomar	2008	Journal	Yes	Yes	Spain	Girona		NE Girona		Source	42	0	0	3	0	0	42	3	Yes	No	No		P	2006	12		Low	Yes	Yes	Maxitrap baited with food	2			Adult	peach
47	L A	Escudero-Colomar	2008	Journal	Yes	Yes	Spain	Girona		NE Girona		Source	42	0	0	3	0	0	42	3	Yes	No	No		P	2007	1		None	No	Yes	Maxitrap baited with food	0			Adult	peach
47	L A	Escudero-Colomar	2008	Journal	Yes	Yes	Spain	Girona		NE Girona		Source	42	0	0	3	0	0	42	3	Yes	No	No		P	2007	5		None	No	Yes	Maxitrap baited with food	0			Adult	peach
47	L A	Escudero-Colomar	2008	Journal	Yes	Yes	Spain	Girona		NE Girona		Source	42	0	0	3	0	0	42	3	Yes	No	No		P	2007	6		None	No	Yes	Maxitrap baited with food	0			Adult	peach
47	L A	Escudero-Colomar	2008	Journal	Yes	Yes	Spain	Girona		NE Girona		Source	42	0	0	3	0	0	42	3	Yes	No	No		P	2007	7		Marginal	Yes	Yes	Maxitrap baited with food	1			Adult	peach
47	L A	Escudero-Colomar	2008	Journal	Yes	Yes	Spain	Girona		NE Girona		Source	42	0	0	3	0	0	42	3	Yes	No	No		P	2007	8		High	Yes	Yes	Maxitrap baited with food	6			Adult	peach
47	L A	Escudero-Colomar	2008	Journal	Yes	Yes	Spain	Girona		NE Girona		Source	42	0	0	3	0	0	42	3	Yes	No	No		P	2007	9		High	Yes	Yes	Maxitrap baited with food	12			Adult	peach
47	L A	Escudero-Colomar	2008	Journal	Yes	Yes	Spain	Girona		NE Girona		Source	42	0	0	3	0	0	42	3	Yes	No	No		P	2007	10		Peak	Yes	Yes	Maxitrap baited with food	18			Adult	peach
47	L A	Escudero-Colomar	2008	Journal	Yes	Yes	Spain	Girona		NE Girona		Source	42	0	0	3	0	0	42	3	Yes	No	No		P	2007	11		Low	Yes	Yes	Maxitrap baited with food	3			Adult	peach
47	L A	Escudero-Colomar	2008	Journal	Yes	Yes	Spain	Girona		NE Girona		Source	42	0	0	3	0	0	42	3	Yes	No	No		P	2007	12		None	No	Yes	Maxitrap baited with food	0			Adult	peach
47	L A	Escudero-Colomar	2008	Journal	Yes	Yes	Spain	Girona		NE Girona		Source	42	0	0	3	0	0	42	3	Yes	No	No		P	2008	1		None	No	Yes	Maxitrap baited with food	0			Adult	peach
47	L A	Escudero-Colomar	2008	Journal	Yes	Yes	Spain	Girona		NE Girona		Source	42	0	0	3	0	0	42	3	Yes	No	No		P	2007	5		None	No	Yes	Maxitrap baited with food	0			Adult	Gala apple
47	L A	Escudero-Colomar	2008	Journal	Yes	Yes	Spain	Girona		NE Girona		Source	42	0	0	3	0	0	42	3	Yes	No	No		P	2007	6		None	No	Yes	Maxitrap baited with food	0			Adult	Gala apple
47	L A	Escudero-Colomar	2008	Journal	Yes	Yes	Spain	Girona		NE Girona		Source	42	0	0	3	0	0	42	3	Yes	No	No		P	2007	7		Marginal	Yes	Yes	Maxitrap baited with food	1			Adult	Gala apple
47	L A	Escudero-Colomar	2008	Journal	Yes	Yes	Spain	Girona		NE Girona		Source	42	0	0	3	0	0	42	3	Yes	No	No		P	2007	8		Low	Yes	Yes	Maxitrap baited with food	2			Adult	Gala apple
47	L A	Escudero-Colomar	2008	Journal	Yes	Yes	Spain	Girona		NE Girona		Source	42	0	0	3	0	0	42	3	Yes	No	No		P	2007	9		High	Yes	Yes	Maxitrap baited with food	5			Adult	Gala apple
47	L A	Escudero-Colomar	2008	Journal	Yes	Yes	Spain	Girona		NE Girona		Source	42	0	0	3	0	0	42	3	Yes	No	No		P	2007	10		Peak	Yes	Yes	Maxitrap baited with food	13			Adult	Gala apple
47	L A	Escudero-Colomar	2008	Journal	Yes	Yes	Spain	Girona		NE Girona		Source	42	0	0	3	0	0	42	3	Yes	No	No		P	2007	11		High	Yes	Yes	Maxitrap baited with food	4			Adult	Gala apple
47	L A	Escudero-Colomar	2008	Journal	Yes	Yes	Spain	Girona		NE Girona		Source	42	0	0	3	0	0	42	3	Yes	No	No		P	2007	12		Marginal	Yes	Yes	Maxitrap baited with food	1			Adult	Gala apple
47	L A	Escudero-Colomar	2008	Journal	Yes	Yes	Spain	Girona		NE Girona		Source	42	0	0	3	0	0	42	3	Yes	No	No		P	2008	1		None	No	Yes	Maxitrap baited with food	0			Adult	Gala apple
47	L A	Escudero-Colomar	2008	Journal	Yes	Yes	Spain	Girona		NE Girona		Source	42	0	0	3	0	0	42	3	Yes	No	No		P	2007	5		None	No	Yes	Maxitrap baited with food	0			Adult	Gala apple
47	L A	Escudero-Colomar	2008	Journal	Yes	Yes	Spain	Girona		NE Girona		Source	42	0	0	3	0	0	42	3	Yes	No	No		P	2007	6		None	No	Yes	Maxitrap baited with food	0			Adult	Fuji apple
47	L A	Escudero-Colomar	2008	Journal	Yes	Yes	Spain	Girona		NE Girona		Source	42	0	0	3	0	0	42	3	Yes	No	No		P	2007	7		Marginal	Yes	Yes	Maxitrap baited with food	1			Adult	Fuji apple
47	L A	Escudero-Colomar	2008	Journal	Yes	Yes	Spain	Girona		NE Girona		Source	42	0	0	3	0	0	42	3	Yes	No	No		P	2007	8		Low	Yes	Yes	Maxitrap baited with food	2			Adult	Fuji apple
47	L A	Escudero-Colomar	2008	Journal	Yes	Yes	Spain	Girona		NE Girona		Source	42	0	0	3	0	0	42	3	Yes	No	No		P	2007	9		Low	Yes	Yes	Maxitrap baited with food	2			Adult	Fuji apple
47	L A	Escudero-Colomar	2008	Journal	Yes	Yes	Spain	Girona		NE Girona		Source	42	0	0	3	0	0	42	3	Yes	No	No		P	2007	10		Peak	Yes	Yes	Maxitrap baited with food	4			Adult	Fuji apple
47	L A	Escudero-Colomar	2008	Journal	Yes	Yes	Spain	Girona		NE Girona		Source	42	0	0	3	0	0	42	3	Yes	No	No		P	2007	11		Low	Yes	Yes	Maxitrap baited with food	2			Adult	Fuji apple
47	L A	Escudero-Colomar	2008	Journal	Yes	Yes	Spain	Girona		NE Girona		Source	42	0	0	3	0	0	42	3	Yes	No	No		P	2007	12		Marginal	Yes	Yes	Maxitrap baited with food	1			Adult	Fuji apple
47	L A	Escudero-Colomar	2008	Journal	Yes	Yes	Spain	Girona		NE Girona		Source	42	0	0	3	0	0	42	3	Yes	No	No		P	2008	1		None	No	Yes	Maxitrap baited with food	0			Adult	Fuji apple
54	G	Gasperi	2002	Journal	Yes	Yes	Kenya			Nairobi		GoogleEarth	-1	17	45	36	49	8	-1.29583	36.8189	No	No	Yes		P	1984	8			Yes	Yes					Pupae	coffee berries
55	G	Gasperi	2002	Journal	Yes	Yes	Kenya			Nairobi		GoogleEarth	-1	17	45	36	49	8	-1.29583	36.8189	No	No	Yes		P	1984	10			Yes	Yes					Pupae	coffee berries
56	G	Gasperi	2002	Journal	Yes	Yes	France	Reunion		Saint Denis		GoogleEarth	-20	52	55	55	27	3	-20.8819	55.4508	No	Yes	No		P	1987	10			Yes	Yes					Pupae	Mimusops elengi
57	G	Gasperi	2002	Journal	Yes	Yes	France	Reunion		Saint Denis		GoogleEarth	-20	52	55	55	27	3	-20.8819	55.4508	No	Yes	No		P	1987	12			Yes	Yes					Pupae	Mimusops elengi
58	G	Gasperi	2002	Journal	Yes	Yes	Italy		Bay of Naples	Procida Island		GoogleEarth	40	45	43	14	1	0.29	40.7619	14.0167	No	Yes	No		P	1985	2			Yes	Yes					Pupae	peach	apricot	fig	bitter orange
59	G	Gasperi	2002	Journal	Yes	Yes	Italy		Bay of Naples	Procida Island		GoogleEarth	40	45	43	14	1	0.29	40.7619	14.0167	No	Yes	No		P	1985	3			Yes	Yes					Pupae	peach	apricot	fig	bitter orange
60	G	Gasperi	2002	Journal	Yes	Yes	Italy		Bay of Naples	Procida Island		GoogleEarth	40	45	43	14	1	0.29	40.7619	14.0167	No	Yes	No		P	1985	4			Yes	Yes					Pupae	peach	apricot	fig	bitter orange
62	G	Gasperi	2002	Journal	Yes	Yes	Italy		Bay of Naples	Procida Island		GoogleEarth	40	45	43	14	1	0.29	40.7619	14.0167	No	Yes	No		P	1985	5			Yes	Yes					Pupae	peach	apricot	fig	bitter orange
63	G	Gasperi	2002	Journal	Yes	Yes	Italy		Bay of Naples	Procida Island		GoogleEarth	40	45	43	14	1	0.29	40.7619	14.0167	No	Yes	No		P	1985	6			Yes	Yes					Pupae	peach	apricot	fig	bitter orange
64	G	Gasperi	2002	Journal	Yes	Yes	Italy		Bay of Naples	Procida Island		GoogleEarth	40	45	43	14	1	0.29	40.7619	14.0167	No	Yes	No		P	1985	7			Yes	Yes					Pupae	peach	apricot	fig	bitter orange
65	G	Gasperi	2002	Journal	Yes	Yes	Italy		Bay of Naples	Procida Island		GoogleEarth	40	45	43	14	1	0.29	40.7619	14.0167	No	Yes	No		P	1985	8			Yes	Yes					Pupae	peach	apricot	fig	bitter orange
66	G	Gasperi	2002	Journal	Yes	Yes	Italy		Bay of Naples	Procida Island		GoogleEarth	40	45	43	14	1	0.29	40.7619	14.0167	No	Yes	No		P	1985	9			Yes	Yes					Pupae	peach	apricot	fig	bitter orange
67	G	Gasperi	2002	Journal	Yes	Yes	Italy		Bay of Naples	Procida Island		GoogleEarth	40	45	43	14	1	0.29	40.7619	14.0167	No	Yes	No		P	1985	10			Yes	Yes					Pupae	peach	apricot	fig	bitter orange
68	G	Gasperi	2002	Journal	Yes	Yes	Italy	Sardinia		Sardinia		GoogleEarth	40	6	0	9	4	0	40.1	9.06667	No	No	Yes		P	1985	10			Yes	Yes					Pupae	peach	apricot	fig	bitter orange
69	G	Gasperi	2002	Journal	Yes	Yes	Italy	Sardinia		Sardinia		GoogleEarth	40	6	0	9	4	0	40.1	9.06667	No	No	Yes		P	1986	9			Yes	Yes					Pupae	peach	apricot	fig	bitter orange
70	G	Gasperi	2002	Journal	Yes	Yes	Italy	Sardinia		Sardinia		GoogleEarth	40	6	0	9	4	0	40.1	9.06667	No	No	Yes		P	1987	9			Yes	Yes					Pupae	peach	apricot	fig	bitter orange
62	M	He	1999	Journal	Yes	Yes	Guatemala		Xalapan	Palin		GoogleEarth	14	24	14	-90	41	55	14.4039	-90.6986	No	Yes	No		P	1995	6			Yes	Yes		18
62	M	He	1999	Journal	Yes	Yes	Guatemala	Retalhuleu		Finca Mujulia		GoogleEarth	14	37		-91	40		14.6167	-91.6667	No	No	Yes		P	1995	3			Yes	Yes		20
62	M	He	1999	Journal	Yes	Yes	Guatemala	Retalhuleu		Finca Guadalupe		GoogleEarth	14	25		-91	50		14.4167	-91.8333	No	No	Yes		P	1995	5			Yes	Yes		20
62	M	He	1999	Journal	Yes	Yes	Guatemala			Mundo Nuevo		GoogleEarth	15	17		-91	28		15.2581	#REF!	No	No	Yes		P	1994	6			Yes	Yes		20
62	M	He	1999	Journal	Yes	Yes	Guatemala	Semana		Finca San Augustin		GoogleEarth	14	33		-90	44		14.55	-90.7333	No	No	Yes		P	1995	7			Yes	Yes		20
62	M	He	1999	Journal	Yes	Yes	Guatemala	Retalhuleu		Finca Mujulia		GoogleEarth	14	37		-91	40		14.6167	-91.6667	No	No	Yes		P	1994	12			Yes	Yes		20
62	M	He	1999	Journal	Yes	Yes	Guatemala	Retalhuleu		Finca El Paraiso		GoogleEarth	14	21		-91	42		14.35	-91.7	No	No	Yes		P	1995	5			Yes	Yes		20
62	M	He	1999	Journal	Yes	Yes	Guatemala	Retalhuleu		Finca Mujulia		GoogleEarth	14	37		-91	40		14.6167	-91.6667	No	No	Yes		P	1994	2			Yes	Yes		20
62	M	He	1999	Journal	Yes	Yes	Argentina			San Pedro		GoogleEarth							#DIV/0!	#DIV/0!	No	No	Yes		P	1990	12			Yes	Yes		12
62	M	He	1999	Journal	Yes	Yes	Argentina			Mendoza		GoogleEarth	-32	53	25	68	50	39	-32.8903	68.8442	No	Yes	No		P	1992	3			Yes	Yes		6
62	M	He	1999	Journal	Yes	Yes	Argentina			Concordia		GoogleEarth	-31	23	31	58	1	1	-31.3919	58.0169	No	Yes	No		P	1993	1			Yes	Yes		21
62	M	He	1999	Journal	Yes	Yes	Argentina			Acceso Norte		GoogleEarth							#DIV/0!	#DIV/0!	No	Yes	No		P	1993	1			Yes	Yes		10
62	M	He	1999	Journal	Yes	Yes	Peru			Huaral		GoogleEarth	-11	29	40	-77	12	36	-11.4944	-77.21	No	Yes	No		P	1994	3			Yes	Yes		20
62	M	He	1999	Journal	Yes	Yes	Peru			Moquequa		GoogleEarth	-17	10	42	-70	56	17	-17.1783	-70.9381	No	Yes	No		P	1997	3			Yes	Yes		20
62	M	He	1999	Journal	Yes	Yes	Costa Rica			Costa Rica		GoogleEarth							#DIV/0!	#DIV/0!	No	Yes	No		P	1996	6			Yes	Yes		25
62	M	He	1999	Journal	Yes	Yes	Australia			Australia		GoogleEarth							#DIV/0!	#DIV/0!	No	Yes	No		P	1994	3			Yes	Yes		22
62	M	He	1999	Journal	Yes	Yes	Greece			Chios		GoogleEarth	38	21	47	26	6	58	38.3631	26.1161	No	Yes	No		P	1993	8			Yes	Yes		24
62	M	He	1999	Journal	Yes	Yes	USA	Hawaii		Kauai		GoogleEarth	22	2	28	-159	22	40	22.0411	-159.378	No	No	Yes		P	1992	2			Yes	Yes		19
62	M	He	1999	Journal	Yes	Yes	USA	Hawaii		Kula		GoogleEarth	20	47	27	-156	19	37	20.7908	-156.327	No	No	Yes		P	1992	8			Yes	Yes		20
62	M	He	1999	Journal	Yes	Yes	USA	Hawaii		Moana		GoogleEarth							#DIV/0!	#DIV/0!	No	No	Yes		P	1992	5			Yes	Yes		16
62	M	He	1999	Journal	Yes	Yes	USA	Florida		Florida		GoogleEarth							#DIV/0!	#DIV/0!	No	Yes	No		T	1997	6			Yes	Yes		36
62	M	He	1999	Journal	Yes	Yes	USA	California	Northern	San Jose		GoogleEarth	37	20	22	-121	53	42	37.3394	-121.895	No	Yes	No		T	1992	7			Yes	Yes		9
62	M	He	1999	Journal	Yes	Yes	USA	California	Northern	San Jose		GoogleEarth	37	20	22	-121	53	42	37.3394	-121.895	No	Yes	No		T	1992	8			Yes	Yes
62	M	He	1999	Journal	Yes	Yes	USA	California	Southern	Pasadena		GoogleEarth	34	8	52	-118	8	40	34.1478	-118.144	No	Yes	No		T	1992	9			Yes	Yes		10
62	M	He	1999	Journal	Yes	Yes	USA	California	Southern	Pasadena		GoogleEarth	34	8	52	-118	8	40	34.1478	-118.144	No	Yes	No		T	1992	10			Yes	Yes
62	M	He	1999	Journal	Yes	Yes	USA	California	Southern	Los Angeles		GoogleEarth	34	3	8	-118	14	37	34.0522	-118.244	No	Yes	No		T	1993	7			Yes	Yes		43
62	M	He	1999	Journal	Yes	Yes	USA	California	Southern	Los Angeles		GoogleEarth	34	3	8	-118	14	37	34.0522	-118.244	No	Yes	No		T	1993	8			Yes	Yes
62	M	He	1999	Journal	Yes	Yes	USA	California	Southern	Los Angeles		GoogleEarth	34	3	8	-118	14	37	34.0522	-118.244	No	Yes	No		T	1993	9			Yes	Yes
62	M	He	1999	Journal	Yes	Yes	USA	California	Southern	Ventura		GoogleEarth	34	16	29	-119	13	44	34.2747	-119.229	No	Yes	No		T	1994	10			Yes	Yes
62	M	He	1999	Journal	Yes	Yes	USA	California	Southern	Ventura		GoogleEarth	34	16	29	-119	13	44	34.2747	-119.229	No	Yes	No		T	1994	11			Yes	Yes		26
62	M	He	1999	Journal	Yes	Yes	USA	California	Southern	Walnut Park		GoogleEarth	33	58	5	-118	13	30	33.9681	-118.225	No	Yes	No		T	1997	9			Yes	Yes		10
62	M	He	1999	Journal	Yes	Yes	USA	California	Southern	Milpitas, Santa Clara		GoogleEarth	37	25	42	-121	54	24	37.4283	-121.907	No	Yes	No		T	1997	9			Yes	Yes		1
65	N	Israely	2004	Journal	Yes	Yes	Israel	Judean Hills		Kibbutz Zova		GoogleEarth	31	5		35	5		31.0833	35.0833	No	Yes	No		P	1994-2001	1		None	No	Yes	Steiner trap baited with trimedlure				Adult	pistachio (Pistacia vera)	oak	wild fig
65	N	Israely	2004	Journal	Yes	Yes	Israel	Judean Hills		Kibbutz Zova		GoogleEarth	31	5		35	5		31.0833	35.0833	No	Yes	No		P	1994-2002	2		None	No	Yes	Steiner trap baited with trimedlure				Adult	pistachio (Pistacia vera)	oak	wild fig
65	N	Israely	2004	Journal	Yes	Yes	Israel	Judean Hills		Kibbutz Zova		GoogleEarth	31	5		35	5		31.0833	35.0833	No	Yes	No		P	1994-2003	3		None	No	Yes	Steiner trap baited with trimedlure				Adult	pistachio (Pistacia vera)	oak	wild fig
65	N	Israely	2004	Journal	Yes	Yes	Israel	Judean Hills		Kibbutz Zova		GoogleEarth	31	5		35	5		31.0833	35.0833	No	Yes	No		P	1994-2004	4		None	No	Yes	Steiner trap baited with trimedlure				Adult	pistachio (Pistacia vera)	oak	wild fig
65	N	Israely	2004	Journal	Yes	Yes	Israel	Judean Hills		Kibbutz Zova		GoogleEarth	31	5		35	5		31.0833	35.0833	No	Yes	No		P	1994-2005	5		Marginal	Yes	Yes	Steiner trap baited with trimedlure				Adult	pistachio (Pistacia vera)	oak	wild fig
65	N	Israely	2004	Journal	Yes	Yes	Israel	Judean Hills		Kibbutz Zova		GoogleEarth	31	5		35	5		31.0833	35.0833	No	Yes	No		P	1994-2006	6		High	Yes	Yes	Steiner trap baited with trimedlure				Adult	pistachio (Pistacia vera)	oak	wild fig
65	N	Israely	2004	Journal	Yes	Yes	Israel	Judean Hills		Kibbutz Zova		GoogleEarth	31	5		35	5		31.0833	35.0833	No	Yes	No		P	1994-2007	7		Peak	Yes	Yes	Steiner trap baited with trimedlure				Adult	pistachio (Pistacia vera)	oak	wild fig
65	N	Israely	2004	Journal	Yes	Yes	Israel	Judean Hills		Kibbutz Zova		GoogleEarth	31	5		35	5		31.0833	35.0833	No	Yes	No		P	1994-2008	8		Low	Yes	Yes	Steiner trap baited with trimedlure				Adult	pistachio (Pistacia vera)	oak	wild fig
65	N	Israely	2004	Journal	Yes	Yes	Israel	Judean Hills		Kibbutz Zova		GoogleEarth	31	5		35	5		31.0833	35.0833	No	Yes	No		P	1994-2009	9		High	Yes	Yes	Steiner trap baited with trimedlure				Adult	pistachio (Pistacia vera)	oak	wild fig
65	N	Israely	2004	Journal	Yes	Yes	Israel	Judean Hills		Kibbutz Zova		GoogleEarth	31	5		35	5		31.0833	35.0833	No	Yes	No		P	1994-2010	10		Peak	Yes	Yes	Steiner trap baited with trimedlure				Adult	pistachio (Pistacia vera)	oak	wild fig
65	N	Israely	2004	Journal	Yes	Yes	Israel	Judean Hills		Kibbutz Zova		GoogleEarth	31	5		35	5		31.0833	35.0833	No	Yes	No		P	1994-2011	11		Low	Yes	Yes	Steiner trap baited with trimedlure				Adult	pistachio (Pistacia vera)	oak	wild fig
65	N	Israely	2004	Journal	Yes	Yes	Israel	Judean Hills		Kibbutz Zova		GoogleEarth	31	5		35	5		31.0833	35.0833	No	Yes	No		P	1994-2012	12		Low	Yes	Yes	Steiner trap baited with trimedlure				Adult	pistachio (Pistacia vera)	oak	wild fig
78	M M	Leza	2008	Journal	Yes	Yes	Spain	Balearic Islands	Mallorca	Central Plain	Orchard 7	GoogleEarth	3			39	40		3	39.6667	No	No	Yes	organic farm	P	2007	6		Peak	Yes	Yes
78	M M	Leza	2008	Journal	Yes	Yes	Spain	Balearic Islands	Mallorca	Central Plain	Orchard 7	GoogleEarth	3			39	40		3	39.6667	No	No	Yes	organic farm	P	2007	7		High	Yes	Yes
78	M M	Leza	2008	Journal	Yes	Yes	Spain	Balearic Islands	Mallorca	Central Plain	Orchard 7	GoogleEarth	3			39	40		3	39.6667	No	No	Yes	organic farm	P	2007	8		Marginal	Yes	Yes
78	M M	Leza	2008	Journal	Yes	Yes	Spain	Balearic Islands	Mallorca	Central Plain	Orchard 7	GoogleEarth	3			39	40		3	39.6667	No	No	Yes	organic farm	P	2007	9		Low	Yes	Yes
78	M M	Leza	2008	Journal	Yes	Yes	Spain	Balearic Islands	Mallorca	Central Plain	Orchard 7	GoogleEarth	3			39	40		3	39.6667	No	No	Yes	organic farm	P	2007	10		Low	Yes	Yes
78	M M	Leza	2008	Journal	Yes	Yes	Spain	Balearic Islands	Mallorca	Central Plain	Orchard 7	GoogleEarth	3			39	40		3	39.6667	No	No	Yes	organic farm	P	2007	11		Low	Yes	Yes
78	M M	Leza	2008	Journal	Yes	Yes	Spain	Balearic Islands	Mallorca	Central Plain	Orchard 7	GoogleEarth	3			39	40		3	39.6667	No	No	Yes	organic farm	P	2007	12		Marginal	Yes	Yes
78	M M	Leza	2008	Journal	Yes	Yes	Spain	Balearic Islands	Mallorca	Central Plain	Orchard 1	GoogleEarth	3			39	40		3	39.6667	No	No	Yes	organic farm	P	2007	5		Low	Yes	Yes
78	M M	Leza	2008	Journal	Yes	Yes	Spain	Balearic Islands	Mallorca	Central Plain	Orchard 1	GoogleEarth	3			39	40		3	39.6667	No	No	Yes	organic farm	P	2007	6		Low	Yes	Yes
78	M M	Leza	2008	Journal	Yes	Yes	Spain	Balearic Islands	Mallorca	Central Plain	Orchard 1	GoogleEarth	3			39	40		3	39.6667	No	No	Yes	organic farm	P	2007	7		Low	Yes	Yes
78	M M	Leza	2008	Journal	Yes	Yes	Spain	Balearic Islands	Mallorca	Central Plain	Orchard 1	GoogleEarth	3			39	40		3	39.6667	No	No	Yes	organic farm	P	2007	8		Low	Yes	Yes
78	M M	Leza	2008	Journal	Yes	Yes	Spain	Balearic Islands	Mallorca	Central Plain	Orchard 1	GoogleEarth	3			39	40		3	39.6667	No	No	Yes	organic farm	P	2007	9		High	Yes	Yes
78	M M	Leza	2008	Journal	Yes	Yes	Spain	Balearic Islands	Mallorca	Central Plain	Orchard 1	GoogleEarth	3			39	40		3	39.6667	No	No	Yes	organic farm	P	2007	10		High	Yes	Yes
78	M M	Leza	2008	Journal	Yes	Yes	Spain	Balearic Islands	Mallorca	Central Plain	Orchard 1	GoogleEarth	3			39	40		3	39.6667	No	No	Yes	organic farm	P	2007	11		Peak	Yes	Yes
78	M M	Leza	2008	Journal	Yes	Yes	Spain	Balearic Islands	Mallorca	Central Plain	Orchard 1	GoogleEarth	3			39	40		3	39.6667	No	No	Yes	organic farm	P	2007	12		Low	Yes	Yes
78	M M	Leza	2008	Journal	Yes	Yes	Spain	Balearic Islands	Mallorca	Central Plain	Orchard 2	GoogleEarth	3			39	40		3	39.6667	No	No	Yes	organic farm	P	2007	5		Peak	Yes	Yes
78	M M	Leza	2008	Journal	Yes	Yes	Spain	Balearic Islands	Mallorca	Central Plain	Orchard 2	GoogleEarth	3			39	40		3	39.6667	No	No	Yes	organic farm	P	2007	6		High	Yes	Yes
78	M M	Leza	2008	Journal	Yes	Yes	Spain	Balearic Islands	Mallorca	Central Plain	Orchard 2	GoogleEarth	3			39	40		3	39.6667	No	No	Yes	organic farm	P	2007	7		Low	Yes	Yes
78	M M	Leza	2008	Journal	Yes	Yes	Spain	Balearic Islands	Mallorca	Central Plain	Orchard 2	GoogleEarth	3			39	40		3	39.6667	No	No	Yes	organic farm	P	2007	8		Low	Yes	Yes
78	M M	Leza	2008	Journal	Yes	Yes	Spain	Balearic Islands	Mallorca	Central Plain	Orchard 2	GoogleEarth	3			39	40		3	39.6667	No	No	Yes	organic farm	P	2007	9		High	Yes	Yes
78	M M	Leza	2008	Journal	Yes	Yes	Spain	Balearic Islands	Mallorca	Central Plain	Orchard 2	GoogleEarth	3			39	40		3	39.6667	No	No	Yes	organic farm	P	2007	10		High	Yes	Yes
78	M M	Leza	2008	Journal	Yes	Yes	Spain	Balearic Islands	Mallorca	Central Plain	Orchard 2	GoogleEarth	3			39	40		3	39.6667	No	No	Yes	organic farm	P	2007	11		Low	Yes	Yes
78	M M	Leza	2008	Journal	Yes	Yes	Spain	Balearic Islands	Mallorca	Central Plain	Orchard 2	GoogleEarth	3			39	40		3	39.6667	No	No	Yes	organic farm	P	2007	12		Low	Yes	Yes
78	M M	Leza	2008	Journal	Yes	Yes	Spain	Balearic Islands	Mallorca	Central Plain	Orchard 3	GoogleEarth	3			39	40		3	39.6667	No	No	Yes	organic farm	P	2007	5		Low	Yes	Yes
78	M M	Leza	2008	Journal	Yes	Yes	Spain	Balearic Islands	Mallorca	Central Plain	Orchard 3	GoogleEarth	3			39	40		3	39.6667	No	No	Yes	organic farm	P	2007	6		Low	Yes	Yes
78	M M	Leza	2008	Journal	Yes	Yes	Spain	Balearic Islands	Mallorca	Central Plain	Orchard 3	GoogleEarth	3			39	40		3	39.6667	No	No	Yes	organic farm	P	2007	7		Low	Yes	Yes
78	M M	Leza	2008	Journal	Yes	Yes	Spain	Balearic Islands	Mallorca	Central Plain	Orchard 3	GoogleEarth	3			39	40		3	39.6667	No	No	Yes	organic farm	P	2007	8		Marginal	Yes	Yes
78	M M	Leza	2008	Journal	Yes	Yes	Spain	Balearic Islands	Mallorca	Central Plain	Orchard 3	GoogleEarth	3			39	40		3	39.6667	No	No	Yes	organic farm	P	2007	9		Low	Yes	Yes
78	M M	Leza	2008	Journal	Yes	Yes	Spain	Balearic Islands	Mallorca	Central Plain	Orchard 3	GoogleEarth	3			39	40		3	39.6667	No	No	Yes	organic farm	P	2007	10		High	Yes	Yes
78	M M	Leza	2008	Journal	Yes	Yes	Spain	Balearic Islands	Mallorca	Central Plain	Orchard 3	GoogleEarth	3			39	40		3	39.6667	No	No	Yes	organic farm	P	2007	11		Peak	Yes	Yes
78	M M	Leza	2008	Journal	Yes	Yes	Spain	Balearic Islands	Mallorca	Central Plain	Orchard 3	GoogleEarth	3			39	40		3	39.6667	No	No	Yes	organic farm	P	2007	12		Low	Yes	Yes
78	M M	Leza	2008	Journal	Yes	Yes	Spain	Balearic Islands	Mallorca	Central Plain	Orchard 4	GoogleEarth	3			39	40		3	39.6667	No	No	Yes	organic farm	P	2007	5		Low	Yes	Yes
78	M M	Leza	2008	Journal	Yes	Yes	Spain	Balearic Islands	Mallorca	Central Plain	Orchard 4	GoogleEarth	3			39	40		3	39.6667	No	No	Yes	organic farm	P	2007	6		High	Yes	Yes
78	M M	Leza	2008	Journal	Yes	Yes	Spain	Balearic Islands	Mallorca	Central Plain	Orchard 4	GoogleEarth	3			39	40		3	39.6667	No	No	Yes	organic farm	P	2007	7		High	Yes	Yes
78	M M	Leza	2008	Journal	Yes	Yes	Spain	Balearic Islands	Mallorca	Central Plain	Orchard 4	GoogleEarth	3			39	40		3	39.6667	No	No	Yes	organic farm	P	2007	8		Low	Yes	Yes
78	M M	Leza	2008	Journal	Yes	Yes	Spain	Balearic Islands	Mallorca	Central Plain	Orchard 4	GoogleEarth	3			39	40		3	39.6667	No	No	Yes	organic farm	P	2007	9		Peak	Yes	Yes
78	M M	Leza	2008	Journal	Yes	Yes	Spain	Balearic Islands	Mallorca	Central Plain	Orchard 4	GoogleEarth	3			39	40		3	39.6667	No	No	Yes	organic farm	P	2007	10		Peak	Yes	Yes
78	M M	Leza	2008	Journal	Yes	Yes	Spain	Balearic Islands	Mallorca	Central Plain	Orchard 4	GoogleEarth	3			39	40		3	39.6667	No	No	Yes	organic farm	P	2007	11		High	Yes	Yes
78	M M	Leza	2008	Journal	Yes	Yes	Spain	Balearic Islands	Mallorca	Central Plain	Orchard 4	GoogleEarth	3			39	40		3	39.6667	No	No	Yes	organic farm	P	2007	12		Low	Yes	Yes
78	M M	Leza	2008	Journal	Yes	Yes	Spain	Balearic Islands	Mallorca	Central Plain	Orchard 5	GoogleEarth	3			39	40		3	39.6667	No	No	Yes	organic farm	P	2007	5		Low	Yes	Yes
78	M M	Leza	2008	Journal	Yes	Yes	Spain	Balearic Islands	Mallorca	Central Plain	Orchard 5	GoogleEarth	3			39	40		3	39.6667	No	No	Yes	organic farm	P	2007	6		High	Yes	Yes
78	M M	Leza	2008	Journal	Yes	Yes	Spain	Balearic Islands	Mallorca	Central Plain	Orchard 5	GoogleEarth	3			39	40		3	39.6667	No	No	Yes	organic farm	P	2007	7		Low	Yes	Yes
78	M M	Leza	2008	Journal	Yes	Yes	Spain	Balearic Islands	Mallorca	Central Plain	Orchard 5	GoogleEarth	3			39	40		3	39.6667	No	No	Yes	organic farm	P	2007	8		Low	Yes	Yes
78	M M	Leza	2008	Journal	Yes	Yes	Spain	Balearic Islands	Mallorca	Central Plain	Orchard 5	GoogleEarth	3			39	40		3	39.6667	No	No	Yes	organic farm	P	2007	9		High	Yes	Yes
78	M M	Leza	2008	Journal	Yes	Yes	Spain	Balearic Islands	Mallorca	Central Plain	Orchard 5	GoogleEarth	3			39	40		3	39.6667	No	No	Yes	organic farm	P	2007	10		Peak	Yes	Yes
78	M M	Leza	2008	Journal	Yes	Yes	Spain	Balearic Islands	Mallorca	Central Plain	Orchard 5	GoogleEarth	3			39	40		3	39.6667	No	No	Yes	organic farm	P	2007	11		Low	Yes	Yes
78	M M	Leza	2008	Journal	Yes	Yes	Spain	Balearic Islands	Mallorca	Central Plain	Orchard 5	GoogleEarth	3			39	40		3	39.6667	No	No	Yes	organic farm	P	2007	12		Low	Yes	Yes
78	M M	Leza	2008	Journal	Yes	Yes	Spain	Balearic Islands	Mallorca	Central Plain	Orchard 6	GoogleEarth	3			39	40		3	39.6667	No	No	Yes	organic farm	P	2007	5		High	Yes	Yes
78	M M	Leza	2008	Journal	Yes	Yes	Spain	Balearic Islands	Mallorca	Central Plain	Orchard 6	GoogleEarth	3			39	40		3	39.6667	No	No	Yes	organic farm	P	2007	6		High	Yes	Yes
78	M M	Leza	2008	Journal	Yes	Yes	Spain	Balearic Islands	Mallorca	Central Plain	Orchard 6	GoogleEarth	3			39	40		3	39.6667	No	No	Yes	organic farm	P	2007	7		Peak	Yes	Yes
78	M M	Leza	2008	Journal	Yes	Yes	Spain	Balearic Islands	Mallorca	Central Plain	Orchard 6	GoogleEarth	3			39	40		3	39.6667	No	No	Yes	organic farm	P	2007	8		Peak	Yes	Yes
78	M M	Leza	2008	Journal	Yes	Yes	Spain	Balearic Islands	Mallorca	Central Plain	Orchard 6	GoogleEarth	3			39	40		3	39.6667	No	No	Yes	organic farm	P	2007	9		High	Yes	Yes
78	M M	Leza	2008	Journal	Yes	Yes	Spain	Balearic Islands	Mallorca	Central Plain	Orchard 6	GoogleEarth	3			39	40		3	39.6667	No	No	Yes	organic farm	P	2007	10		High	Yes	Yes
78	M M	Leza	2008	Journal	Yes	Yes	Spain	Balearic Islands	Mallorca	Central Plain	Orchard 6	GoogleEarth	3			39	40		3	39.6667	No	No	Yes	organic farm	P	2007	11		High	Yes	Yes
78	M M	Leza	2008	Journal	Yes	Yes	Spain	Balearic Islands	Mallorca	Central Plain	Orchard 6	GoogleEarth	3			39	40		3	39.6667	No	No	Yes	organic farm	P	2007	12		Low	Yes	Yes
85	M T	Martinez-Ferrer	2010	Journal	Yes	Yes	Spain	Tarragona		Tarragona		Source							40.23	0.34	Yes	No	No		P	2003	1		None	No	Yes	trimedlure				Adult	clementines
85	M T	Martinez-Ferrer	2010	Journal	Yes	Yes	Spain	Tarragona		Tarragona		Source							40.23	0.34	Yes	No	No		P	2003	2		None	No	Yes	trimedlure				Adult	clementines
85	M T	Martinez-Ferrer	2010	Journal	Yes	Yes	Spain	Tarragona		Tarragona		Source							40.23	0.34	Yes	No	No		P	2003	3		None	No	Yes	trimedlure				Adult	clementines
85	M T	Martinez-Ferrer	2010	Journal	Yes	Yes	Spain	Tarragona		Tarragona		Source							40.23	0.34	Yes	No	No		P	2003	4		None	No	Yes	trimedlure				Adult	clementines
85	M T	Martinez-Ferrer	2010	Journal	Yes	Yes	Spain	Tarragona		Tarragona		Source							40.23	0.34	Yes	No	No		P	2003	5		None	No	Yes	trimedlure				Adult	clementines
85	M T	Martinez-Ferrer	2010	Journal	Yes	Yes	Spain	Tarragona		Tarragona		Source							40.23	0.34	Yes	No	No		P	2003	6		Marginal	Yes	Yes	trimedlure				Adult	clementines
85	M T	Martinez-Ferrer	2010	Journal	Yes	Yes	Spain	Tarragona		Tarragona		Source							40.23	0.34	Yes	No	No		P	2003	7		Low	Yes	Yes	trimedlure				Adult	clementines
85	M T	Martinez-Ferrer	2010	Journal	Yes	Yes	Spain	Tarragona		Tarragona		Source							40.23	0.34	Yes	No	No		P	2003	8		Low	Yes	Yes	trimedlure				Adult	clementines
85	M T	Martinez-Ferrer	2010	Journal	Yes	Yes	Spain	Tarragona		Tarragona		Source							40.23	0.34	Yes	No	No		P	2003	9		Peak	Yes	Yes	trimedlure				Adult	clementines
85	M T	Martinez-Ferrer	2010	Journal	Yes	Yes	Spain	Tarragona		Tarragona		Source							40.23	0.34	Yes	No	No		P	2003	10		High	Yes	Yes	trimedlure				Adult	clementines
85	M T	Martinez-Ferrer	2010	Journal	Yes	Yes	Spain	Tarragona		Tarragona		Source							40.23	0.34	Yes	No	No		P	2003	11		Low	Yes	Yes	trimedlure				Adult	clementines
85	M T	Martinez-Ferrer	2010	Journal	Yes	Yes	Spain	Tarragona		Tarragona		Source							40.23	0.34	Yes	No	No		P	2003	12		Marginal	Yes	Yes	trimedlure				Adult	clementines
85	M T	Martinez-Ferrer	2010	Journal	Yes	Yes	Spain	Tarragona		Tarragona		Source							40.23	0.34	Yes	No	No		P	2004	1		None	No	Yes	trimedlure				Adult	clementines
85	M T	Martinez-Ferrer	2010	Journal	Yes	Yes	Spain	Tarragona		Tarragona		Source							40.23	0.34	Yes	No	No		P	2004	2		None	No	Yes	trimedlure				Adult	clementines
85	M T	Martinez-Ferrer	2010	Journal	Yes	Yes	Spain	Tarragona		Tarragona		Source							40.23	0.34	Yes	No	No		P	2004	3		None	No	Yes	trimedlure				Adult	clementines
85	M T	Martinez-Ferrer	2010	Journal	Yes	Yes	Spain	Tarragona		Tarragona		Source							40.23	0.34	Yes	No	No		P	2004	4		None	No	Yes	trimedlure				Adult	clementines
85	M T	Martinez-Ferrer	2010	Journal	Yes	Yes	Spain	Tarragona		Tarragona		Source							40.23	0.34	Yes	No	No		P	2004	5		None	No	Yes	trimedlure				Adult	clementines
85	M T	Martinez-Ferrer	2010	Journal	Yes	Yes	Spain	Tarragona		Tarragona		Source							40.23	0.34	Yes	No	No		P	2004	6		Marginal	Yes	Yes	trimedlure				Adult	clementines
85	M T	Martinez-Ferrer	2010	Journal	Yes	Yes	Spain	Tarragona		Tarragona		Source							40.23	0.34	Yes	No	No		P	2004	7		Peak	Yes	Yes	trimedlure				Adult	clementines
85	M T	Martinez-Ferrer	2010	Journal	Yes	Yes	Spain	Tarragona		Tarragona		Source							40.23	0.34	Yes	No	No		P	2004	8		Low	Yes	Yes	trimedlure				Adult	clementines
85	M T	Martinez-Ferrer	2010	Journal	Yes	Yes	Spain	Tarragona		Tarragona		Source							40.23	0.34	Yes	No	No		P	2004	9		Peak	Yes	Yes	trimedlure				Adult	clementines
85	M T	Martinez-Ferrer	2010	Journal	Yes	Yes	Spain	Tarragona		Tarragona		Source							40.23	0.34	Yes	No	No		P	2004	10		Low	Yes	Yes	trimedlure				Adult	clementines
85	M T	Martinez-Ferrer	2010	Journal	Yes	Yes	Spain	Tarragona		Tarragona		Source							40.23	0.34	Yes	No	No		P	2004	11		Low	Yes	Yes	trimedlure				Adult	clementines
85	M T	Martinez-Ferrer	2010	Journal	Yes	Yes	Spain	Tarragona		Tarragona		Source							40.23	0.34	Yes	No	No		P	2004	12		Marginal	Yes	Yes	trimedlure				Adult	clementines
85	M T	Martinez-Ferrer	2010	Journal	Yes	Yes	Spain	Tarragona		Tarragona		Source							40.23	0.34	Yes	No	No		P	2005	1		None	No	Yes	trimedlure				Adult	clementines
85	M T	Martinez-Ferrer	2010	Journal	Yes	Yes	Spain	Tarragona		Tarragona		Source							40.23	0.34	Yes	No	No		P	2005	2		None	No	Yes	trimedlure				Adult	clementines
85	M T	Martinez-Ferrer	2010	Journal	Yes	Yes	Spain	Tarragona		Tarragona		Source							40.23	0.34	Yes	No	No		P	2005	3		None	No	Yes	trimedlure				Adult	clementines
85	M T	Martinez-Ferrer	2010	Journal	Yes	Yes	Spain	Tarragona		Tarragona		Source							40.23	0.34	Yes	No	No		P	2005	4		None	No	Yes	trimedlure				Adult	clementines
85	M T	Martinez-Ferrer	2010	Journal	Yes	Yes	Spain	Tarragona		Tarragona		Source							40.23	0.34	Yes	No	No		P	2005	5		None	No	Yes	trimedlure				Adult	clementines
85	M T	Martinez-Ferrer	2010	Journal	Yes	Yes	Spain	Tarragona		Tarragona		Source							40.23	0.34	Yes	No	No		P	2005	6		None	No	Yes	trimedlure				Adult	clementines
85	M T	Martinez-Ferrer	2010	Journal	Yes	Yes	Spain	Tarragona		Tarragona		Source							40.23	0.34	Yes	No	No		P	2005	7		Marginal	Yes	Yes	trimedlure				Adult	clementines
85	M T	Martinez-Ferrer	2010	Journal	Yes	Yes	Spain	Tarragona		Tarragona		Source							40.23	0.34	Yes	No	No		P	2005	8		High	Yes	Yes	trimedlure				Adult	clementines
85	M T	Martinez-Ferrer	2010	Journal	Yes	Yes	Spain	Tarragona		Tarragona		Source							40.23	0.34	Yes	No	No		P	2005	9		Peak	Yes	Yes	trimedlure				Adult	clementines
85	M T	Martinez-Ferrer	2010	Journal	Yes	Yes	Spain	Tarragona		Tarragona		Source							40.23	0.34	Yes	No	No		P	2005	10		High	Yes	Yes	trimedlure				Adult	clementines
85	M T	Martinez-Ferrer	2010	Journal	Yes	Yes	Spain	Tarragona		Tarragona		Source							40.23	0.34	Yes	No	No		P	2005	11		Peak	Yes	Yes	trimedlure				Adult	clementines
85	M T	Martinez-Ferrer	2010	Journal	Yes	Yes	Spain	Tarragona		Tarragona		Source							40.23	0.34	Yes	No	No		P	2005	12		Marginal	Yes	Yes	trimedlure				Adult	clementines
85	M T	Martinez-Ferrer	2010	Journal	Yes	Yes	Spain	Tarragona		Tarragona		Source							40.23	0.34	Yes	No	No		P	2006	1		None	No	Yes	trimedlure				Adult	clementines
85	M T	Martinez-Ferrer	2010	Journal	Yes	Yes	Spain	Tarragona		Tarragona		Source							40.23	0.34	Yes	No	No		P	2006	2		None	No	Yes	trimedlure				Adult	clementines
85	M T	Martinez-Ferrer	2010	Journal	Yes	Yes	Spain	Tarragona		Tarragona		Source							40.23	0.34	Yes	No	No		P	2006	3		None	No	Yes	trimedlure				Adult	clementines
85	M T	Martinez-Ferrer	2010	Journal	Yes	Yes	Spain	Tarragona		Tarragona		Source							40.23	0.34	Yes	No	No		P	2006	4		None	No	Yes	trimedlure				Adult	clementines
85	M T	Martinez-Ferrer	2010	Journal	Yes	Yes	Spain	Tarragona		Tarragona		Source							40.23	0.34	Yes	No	No		P	2006	5		None	No	Yes	trimedlure				Adult	clementines
85	M T	Martinez-Ferrer	2010	Journal	Yes	Yes	Spain	Tarragona		Tarragona		Source							40.23	0.34	Yes	No	No		P	2006	6		Marginal	Yes	Yes	trimedlure				Adult	clementines
85	M T	Martinez-Ferrer	2010	Journal	Yes	Yes	Spain	Tarragona		Tarragona		Source							40.23	0.34	Yes	No	No		P	2006	7		Peak	Yes	Yes	trimedlure				Adult	clementines
85	M T	Martinez-Ferrer	2010	Journal	Yes	Yes	Spain	Tarragona		Tarragona		Source							40.23	0.34	Yes	No	No		P	2006	8		Peak	Yes	Yes	trimedlure				Adult	clementines
85	M T	Martinez-Ferrer	2010	Journal	Yes	Yes	Spain	Tarragona		Tarragona		Source							40.23	0.34	Yes	No	No		P	2006	9		High	Yes	Yes	trimedlure				Adult	clementines
85	M T	Martinez-Ferrer	2010	Journal	Yes	Yes	Spain	Tarragona		Tarragona		Source							40.23	0.34	Yes	No	No		P	2006	10		High	Yes	Yes	trimedlure				Adult	clementines
85	M T	Martinez-Ferrer	2010	Journal	Yes	Yes	Spain	Tarragona		Tarragona		Source							40.23	0.34	Yes	No	No		P	2006	11		Peak	Yes	Yes	trimedlure				Adult	clementines
85	M T	Martinez-Ferrer	2010	Journal	Yes	Yes	Spain	Tarragona		Tarragona		Source							40.23	0.34	Yes	No	No		P	2006	12		Peak	Yes	Yes	trimedlure				Adult	clementines
85	M T	Martinez-Ferrer	2010	Journal	Yes	Yes	Spain	Tarragona		Tarragona		Source							40.23	0.34	Yes	No	No		P	2007	1		None	No	Yes	trimedlure				Adult	clementines
85	M T	Martinez-Ferrer	2010	Journal	Yes	Yes	Spain	Tarragona		Tarragona		Source							40.23	0.34	Yes	No	No		P	2007	2		None	No	Yes	trimedlure				Adult	clementines
85	M T	Martinez-Ferrer	2010	Journal	Yes	Yes	Spain	Tarragona		Tarragona		Source							40.23	0.34	Yes	No	No		P	2007	3		None	No	Yes	trimedlure				Adult	clementines
85	M T	Martinez-Ferrer	2010	Journal	Yes	Yes	Spain	Tarragona		Tarragona		Source							40.23	0.34	Yes	No	No		P	2007	4		None	No	Yes	trimedlure				Adult	clementines
85	M T	Martinez-Ferrer	2010	Journal	Yes	Yes	Spain	Tarragona		Tarragona		Source							40.23	0.34	Yes	No	No		P	2007	5		Low	Yes	Yes	trimedlure				Adult	clementines
85	M T	Martinez-Ferrer	2010	Journal	Yes	Yes	Spain	Tarragona		Tarragona		Source							40.23	0.34	Yes	No	No		P	2007	6		Peak	Yes	Yes	trimedlure				Adult	clementines
85	M T	Martinez-Ferrer	2010	Journal	Yes	Yes	Spain	Tarragona		Tarragona		Source							40.23	0.34	Yes	No	No		P	2007	7		High	Yes	Yes	trimedlure				Adult	clementines
85	M T	Martinez-Ferrer	2010	Journal	Yes	Yes	Spain	Tarragona		Tarragona		Source							40.23	0.34	Yes	No	No		P	2007	8		Low	Yes	Yes	trimedlure				Adult	clementines
85	M T	Martinez-Ferrer	2010	Journal	Yes	Yes	Spain	Tarragona		Tarragona		Source							40.23	0.34	Yes	No	No		P	2007	9		Low	Yes	Yes	trimedlure				Adult	clementines
85	M T	Martinez-Ferrer	2010	Journal	Yes	Yes	Spain	Tarragona		Tarragona		Source							40.23	0.34	Yes	No	No		P	2007	10		Low	Yes	Yes	trimedlure				Adult	clementines
85	M T	Martinez-Ferrer	2010	Journal	Yes	Yes	Spain	Tarragona		Tarragona		Source							40.23	0.34	Yes	No	No		P	2007	11		Low	Yes	Yes	trimedlure				Adult	clementines
85	M T	Martinez-Ferrer	2010	Journal	Yes	Yes	Spain	Tarragona		Tarragona		Source							40.23	0.34	Yes	No	No		P	2007	12		Marginal	Yes	Yes	trimedlure				Adult	clementines
85	M T	Martinez-Ferrer	2010	Journal	Yes	Yes	Spain	Tarragona		Tarragona		Source							40.23	0.34	Yes	No	No		P	2003	1		None	No	Yes	tripack				Adult	clementines
85	M T	Martinez-Ferrer	2010	Journal	Yes	Yes	Spain	Tarragona		Tarragona		Source							40.23	0.34	Yes	No	No		P	2003	2		None	No	Yes	tripack				Adult	clementines
85	M T	Martinez-Ferrer	2010	Journal	Yes	Yes	Spain	Tarragona		Tarragona		Source							40.23	0.34	Yes	No	No		P	2003	3		None	No	Yes	tripack				Adult	clementines
85	M T	Martinez-Ferrer	2010	Journal	Yes	Yes	Spain	Tarragona		Tarragona		Source							40.23	0.34	Yes	No	No		P	2003	4		None	No	Yes	tripack				Adult	clementines
85	M T	Martinez-Ferrer	2010	Journal	Yes	Yes	Spain	Tarragona		Tarragona		Source							40.23	0.34	Yes	No	No		P	2003	5		None	No	Yes	tripack				Adult	clementines
85	M T	Martinez-Ferrer	2010	Journal	Yes	Yes	Spain	Tarragona		Tarragona		Source							40.23	0.34	Yes	No	No		P	2003	6		Marginal	Yes	Yes	tripack				Adult	clementines
85	M T	Martinez-Ferrer	2010	Journal	Yes	Yes	Spain	Tarragona		Tarragona		Source							40.23	0.34	Yes	No	No		P	2003	7		High	Yes	Yes	tripack				Adult	clementines
85	M T	Martinez-Ferrer	2010	Journal	Yes	Yes	Spain	Tarragona		Tarragona		Source							40.23	0.34	Yes	No	No		P	2003	8		Low	Yes	Yes	tripack				Adult	clementines
85	M T	Martinez-Ferrer	2010	Journal	Yes	Yes	Spain	Tarragona		Tarragona		Source							40.23	0.34	Yes	No	No		P	2003	9		Peak	Yes	Yes	tripack				Adult	clementines
85	M T	Martinez-Ferrer	2010	Journal	Yes	Yes	Spain	Tarragona		Tarragona		Source							40.23	0.34	Yes	No	No		P	2003	10		Peak	Yes	Yes	tripack				Adult	clementines
85	M T	Martinez-Ferrer	2010	Journal	Yes	Yes	Spain	Tarragona		Tarragona		Source							40.23	0.34	Yes	No	No		P	2003	11		Low	Yes	Yes	tripack				Adult	clementines
85	M T	Martinez-Ferrer	2010	Journal	Yes	Yes	Spain	Tarragona		Tarragona		Source							40.23	0.34	Yes	No	No		P	2003	12		Marginal	Yes	Yes	tripack				Adult	clementines
85	M T	Martinez-Ferrer	2010	Journal	Yes	Yes	Spain	Tarragona		Tarragona		Source							40.23	0.34	Yes	No	No		P	2004	1		None	No	Yes	tripack				Adult	clementines
85	M T	Martinez-Ferrer	2010	Journal	Yes	Yes	Spain	Tarragona		Tarragona		Source							40.23	0.34	Yes	No	No		P	2004	2		None	No	Yes	tripack				Adult	clementines
85	M T	Martinez-Ferrer	2010	Journal	Yes	Yes	Spain	Tarragona		Tarragona		Source							40.23	0.34	Yes	No	No		P	2004	3		None	No	Yes	tripack				Adult	clementines
85	M T	Martinez-Ferrer	2010	Journal	Yes	Yes	Spain	Tarragona		Tarragona		Source							40.23	0.34	Yes	No	No		P	2004	4		None	No	Yes	tripack				Adult	clementines
85	M T	Martinez-Ferrer	2010	Journal	Yes	Yes	Spain	Tarragona		Tarragona		Source							40.23	0.34	Yes	No	No		P	2004	5		None	No	Yes	tripack				Adult	clementines
85	M T	Martinez-Ferrer	2010	Journal	Yes	Yes	Spain	Tarragona		Tarragona		Source							40.23	0.34	Yes	No	No		P	2004	6		Marginal	Yes	Yes	tripack				Adult	clementines
85	M T	Martinez-Ferrer	2010	Journal	Yes	Yes	Spain	Tarragona		Tarragona		Source							40.23	0.34	Yes	No	No		P	2004	7		Low	Yes	Yes	tripack				Adult	clementines
85	M T	Martinez-Ferrer	2010	Journal	Yes	Yes	Spain	Tarragona		Tarragona		Source							40.23	0.34	Yes	No	No		P	2004	8		Low	Yes	Yes	tripack				Adult	clementines
85	M T	Martinez-Ferrer	2010	Journal	Yes	Yes	Spain	Tarragona		Tarragona		Source							40.23	0.34	Yes	No	No		P	2004	9		Low	Yes	Yes	tripack				Adult	clementines
85	M T	Martinez-Ferrer	2010	Journal	Yes	Yes	Spain	Tarragona		Tarragona		Source							40.23	0.34	Yes	No	No		P	2004	10		Peak	Yes	Yes	tripack				Adult	clementines
85	M T	Martinez-Ferrer	2010	Journal	Yes	Yes	Spain	Tarragona		Tarragona		Source							40.23	0.34	Yes	No	No		P	2004	11		Low	Yes	Yes	tripack				Adult	clementines
85	M T	Martinez-Ferrer	2010	Journal	Yes	Yes	Spain	Tarragona		Tarragona		Source							40.23	0.34	Yes	No	No		P	2004	12		Marginal	Yes	Yes	tripack				Adult	clementines
85	M T	Martinez-Ferrer	2010	Journal	Yes	Yes	Spain	Tarragona		Tarragona		Source							40.23	0.34	Yes	No	No		P	2005	1		None	No	Yes	tripack				Adult	clementines
85	M T	Martinez-Ferrer	2010	Journal	Yes	Yes	Spain	Tarragona		Tarragona		Source							40.23	0.34	Yes	No	No		P	2005	2		None	No	Yes	tripack				Adult	clementines
85	M T	Martinez-Ferrer	2010	Journal	Yes	Yes	Spain	Tarragona		Tarragona		Source							40.23	0.34	Yes	No	No		P	2005	3		None	No	Yes	tripack				Adult	clementines
85	M T	Martinez-Ferrer	2010	Journal	Yes	Yes	Spain	Tarragona		Tarragona		Source							40.23	0.34	Yes	No	No		P	2005	4		None	No	Yes	tripack				Adult	clementines
85	M T	Martinez-Ferrer	2010	Journal	Yes	Yes	Spain	Tarragona		Tarragona		Source							40.23	0.34	Yes	No	No		P	2005	5		None	No	Yes	tripack				Adult	clementines
85	M T	Martinez-Ferrer	2010	Journal	Yes	Yes	Spain	Tarragona		Tarragona		Source							40.23	0.34	Yes	No	No		P	2005	6		None	No	Yes	tripack				Adult	clementines
85	M T	Martinez-Ferrer	2010	Journal	Yes	Yes	Spain	Tarragona		Tarragona		Source							40.23	0.34	Yes	No	No		P	2005	7		High	Yes	Yes	tripack				Adult	clementines
85	M T	Martinez-Ferrer	2010	Journal	Yes	Yes	Spain	Tarragona		Tarragona		Source							40.23	0.34	Yes	No	No		P	2005	8		Peak	Yes	Yes	tripack				Adult	clementines
85	M T	Martinez-Ferrer	2010	Journal	Yes	Yes	Spain	Tarragona		Tarragona		Source							40.23	0.34	Yes	No	No		P	2005	9		High	Yes	Yes	tripack				Adult	clementines
85	M T	Martinez-Ferrer	2010	Journal	Yes	Yes	Spain	Tarragona		Tarragona		Source							40.23	0.34	Yes	No	No		P	2005	10		High	Yes	Yes	tripack				Adult	clementines
85	M T	Martinez-Ferrer	2010	Journal	Yes	Yes	Spain	Tarragona		Tarragona		Source							40.23	0.34	Yes	No	No		P	2005	11		High	Yes	Yes	tripack				Adult	clementines
85	M T	Martinez-Ferrer	2010	Journal	Yes	Yes	Spain	Tarragona		Tarragona		Source							40.23	0.34	Yes	No	No		P	2005	12		Marginal	Yes	Yes	tripack				Adult	clementines
85	M T	Martinez-Ferrer	2010	Journal	Yes	Yes	Spain	Tarragona		Tarragona		Source							40.23	0.34	Yes	No	No		P	2006	1		None	No	Yes	tripack				Adult	clementines
85	M T	Martinez-Ferrer	2010	Journal	Yes	Yes	Spain	Tarragona		Tarragona		Source							40.23	0.34	Yes	No	No		P	2006	2		None	No	Yes	tripack				Adult	clementines
85	M T	Martinez-Ferrer	2010	Journal	Yes	Yes	Spain	Tarragona		Tarragona		Source							40.23	0.34	Yes	No	No		P	2006	3		None	No	Yes	tripack				Adult	clementines
85	M T	Martinez-Ferrer	2010	Journal	Yes	Yes	Spain	Tarragona		Tarragona		Source							40.23	0.34	Yes	No	No		P	2006	4		None	No	Yes	tripack				Adult	clementines
85	M T	Martinez-Ferrer	2010	Journal	Yes	Yes	Spain	Tarragona		Tarragona		Source							40.23	0.34	Yes	No	No		P	2006	5		None	No	Yes	tripack				Adult	clementines
85	M T	Martinez-Ferrer	2010	Journal	Yes	Yes	Spain	Tarragona		Tarragona		Source							40.23	0.34	Yes	No	No		P	2006	6		Marginal	Yes	Yes	tripack				Adult	clementines
85	M T	Martinez-Ferrer	2010	Journal	Yes	Yes	Spain	Tarragona		Tarragona		Source							40.23	0.34	Yes	No	No		P	2006	7		Peak	Yes	Yes	tripack				Adult	clementines
85	M T	Martinez-Ferrer	2010	Journal	Yes	Yes	Spain	Tarragona		Tarragona		Source							40.23	0.34	Yes	No	No		P	2006	8		High	Yes	Yes	tripack				Adult	clementines
85	M T	Martinez-Ferrer	2010	Journal	Yes	Yes	Spain	Tarragona		Tarragona		Source							40.23	0.34	Yes	No	No		P	2006	9		Low	Yes	Yes	tripack				Adult	clementines
85	M T	Martinez-Ferrer	2010	Journal	Yes	Yes	Spain	Tarragona		Tarragona		Source							40.23	0.34	Yes	No	No		P	2006	10		High	Yes	Yes	tripack				Adult	clementines
85	M T	Martinez-Ferrer	2010	Journal	Yes	Yes	Spain	Tarragona		Tarragona		Source							40.23	0.34	Yes	No	No		P	2006	11		High	Yes	Yes	tripack				Adult	clementines
85	M T	Martinez-Ferrer	2010	Journal	Yes	Yes	Spain	Tarragona		Tarragona		Source							40.23	0.34	Yes	No	No		P	2006	12		Peak	Yes	Yes	tripack				Adult	clementines
85	M T	Martinez-Ferrer	2010	Journal	Yes	Yes	Spain	Tarragona		Tarragona		Source							40.23	0.34	Yes	No	No		P	2007	1		None	No	Yes	tripack				Adult	clementines
85	M T	Martinez-Ferrer	2010	Journal	Yes	Yes	Spain	Tarragona		Tarragona		Source							40.23	0.34	Yes	No	No		P	2007	2		None	No	Yes	tripack				Adult	clementines
85	M T	Martinez-Ferrer	2010	Journal	Yes	Yes	Spain	Tarragona		Tarragona		Source							40.23	0.34	Yes	No	No		P	2007	3		None	No	Yes	tripack				Adult	clementines
85	M T	Martinez-Ferrer	2010	Journal	Yes	Yes	Spain	Tarragona		Tarragona		Source							40.23	0.34	Yes	No	No		P	2007	4		None	No	Yes	tripack				Adult	clementines
85	M T	Martinez-Ferrer	2010	Journal	Yes	Yes	Spain	Tarragona		Tarragona		Source							40.23	0.34	Yes	No	No		P	2007	5		Low	Yes	Yes	tripack				Adult	clementines
85	M T	Martinez-Ferrer	2010	Journal	Yes	Yes	Spain	Tarragona		Tarragona		Source							40.23	0.34	Yes	No	No		P	2007	6		Peak	Yes	Yes	tripack				Adult	clementines
85	M T	Martinez-Ferrer	2010	Journal	Yes	Yes	Spain	Tarragona		Tarragona		Source							40.23	0.34	Yes	No	No		P	2007	7		High	Yes	Yes	tripack				Adult	clementines
85	M T	Martinez-Ferrer	2010	Journal	Yes	Yes	Spain	Tarragona		Tarragona		Source							40.23	0.34	Yes	No	No		P	2007	8		Low	Yes	Yes	tripack				Adult	clementines
85	M T	Martinez-Ferrer	2010	Journal	Yes	Yes	Spain	Tarragona		Tarragona		Source							40.23	0.34	Yes	No	No		P	2007	9		High	Yes	Yes	tripack				Adult	clementines
85	M T	Martinez-Ferrer	2010	Journal	Yes	Yes	Spain	Tarragona		Tarragona		Source							40.23	0.34	Yes	No	No		P	2007	10		Low	Yes	Yes	tripack				Adult	clementines
85	M T	Martinez-Ferrer	2010	Journal	Yes	Yes	Spain	Tarragona		Tarragona		Source							40.23	0.34	Yes	No	No		P	2007	11		Low	Yes	Yes	tripack				Adult	clementines
85	M T	Martinez-Ferrer	2010	Journal	Yes	Yes	Spain	Tarragona		Tarragona		Source							40.23	0.34	Yes	No	No		P	2007	12		Marginal	Yes	Yes	tripack				Adult	clementines
85	M T	Martinez-Ferrer	2010	Journal	Yes	Yes	Spain	Valencia		Valencia		Source							39.14	-0.28	Yes	No	No		P	2003	1		None	No	Yes	trimedlure				Adult	clementines	sweet oranges (Citrus sinensis)
85	M T	Martinez-Ferrer	2010	Journal	Yes	Yes	Spain	Valencia		Valencia		Source							39.14	-0.28	Yes	No	No		P	2003	2		None	No	Yes	trimedlure				Adult	clementines	sweet oranges (Citrus sinensis)
85	M T	Martinez-Ferrer	2010	Journal	Yes	Yes	Spain	Valencia		Valencia		Source							39.14	-0.28	Yes	No	No		P	2003	3		None	No	Yes	trimedlure				Adult	clementines	sweet oranges (Citrus sinensis)
85	M T	Martinez-Ferrer	2010	Journal	Yes	Yes	Spain	Valencia		Valencia		Source							39.14	-0.28	Yes	No	No		P	2003	4		None	No	Yes	trimedlure				Adult	clementines	sweet oranges (Citrus sinensis)
85	M T	Martinez-Ferrer	2010	Journal	Yes	Yes	Spain	Valencia		Valencia		Source							39.14	-0.28	Yes	No	No		P	2003	5		Low	Yes	Yes	trimedlure				Adult	clementines	sweet oranges (Citrus sinensis)
85	M T	Martinez-Ferrer	2010	Journal	Yes	Yes	Spain	Valencia		Valencia		Source							39.14	-0.28	Yes	No	No		P	2003	6		Peak	Yes	Yes	trimedlure				Adult	clementines	sweet oranges (Citrus sinensis)
85	M T	Martinez-Ferrer	2010	Journal	Yes	Yes	Spain	Valencia		Valencia		Source							39.14	-0.28	Yes	No	No		P	2003	7		Peak	Yes	Yes	trimedlure				Adult	clementines	sweet oranges (Citrus sinensis)
85	M T	Martinez-Ferrer	2010	Journal	Yes	Yes	Spain	Valencia		Valencia		Source							39.14	-0.28	Yes	No	No		P	2003	8		High	Yes	Yes	trimedlure				Adult	clementines	sweet oranges (Citrus sinensis)
85	M T	Martinez-Ferrer	2010	Journal	Yes	Yes	Spain	Valencia		Valencia		Source							39.14	-0.28	Yes	No	No		P	2003	9		Low	Yes	Yes	trimedlure				Adult	clementines	sweet oranges (Citrus sinensis)
85	M T	Martinez-Ferrer	2010	Journal	Yes	Yes	Spain	Valencia		Valencia		Source							39.14	-0.28	Yes	No	No		P	2003	10		Marginal	Yes	Yes	trimedlure				Adult	clementines	sweet oranges (Citrus sinensis)
85	M T	Martinez-Ferrer	2010	Journal	Yes	Yes	Spain	Valencia		Valencia		Source							39.14	-0.28	Yes	No	No		P	2003	11		Marginal	Yes	Yes	trimedlure				Adult	clementines	sweet oranges (Citrus sinensis)
85	M T	Martinez-Ferrer	2010	Journal	Yes	Yes	Spain	Valencia		Valencia		Source							39.14	-0.28	Yes	No	No		P	2003	12		None	No	Yes	trimedlure				Adult	clementines	sweet oranges (Citrus sinensis)
85	M T	Martinez-Ferrer	2010	Journal	Yes	Yes	Spain	Valencia		Valencia		Source							39.14	-0.28	Yes	No	No		P	2004	1		None	No	Yes	trimedlure				Adult	clementines	sweet oranges (Citrus sinensis)
85	M T	Martinez-Ferrer	2010	Journal	Yes	Yes	Spain	Valencia		Valencia		Source							39.14	-0.28	Yes	No	No		P	2004	2		None	No	Yes	trimedlure				Adult	clementines	sweet oranges (Citrus sinensis)
85	M T	Martinez-Ferrer	2010	Journal	Yes	Yes	Spain	Valencia		Valencia		Source							39.14	-0.28	Yes	No	No		P	2004	3		None	No	Yes	trimedlure				Adult	clementines	sweet oranges (Citrus sinensis)
85	M T	Martinez-Ferrer	2010	Journal	Yes	Yes	Spain	Valencia		Valencia		Source							39.14	-0.28	Yes	No	No		P	2004	4		None	No	Yes	trimedlure				Adult	clementines	sweet oranges (Citrus sinensis)
85	M T	Martinez-Ferrer	2010	Journal	Yes	Yes	Spain	Valencia		Valencia		Source							39.14	-0.28	Yes	No	No		P	2004	5		Marginal	Yes	Yes	trimedlure				Adult	clementines	sweet oranges (Citrus sinensis)
85	M T	Martinez-Ferrer	2010	Journal	Yes	Yes	Spain	Valencia		Valencia		Source							39.14	-0.28	Yes	No	No		P	2004	6		High	Yes	Yes	trimedlure				Adult	clementines	sweet oranges (Citrus sinensis)
85	M T	Martinez-Ferrer	2010	Journal	Yes	Yes	Spain	Valencia		Valencia		Source							39.14	-0.28	Yes	No	No		P	2004	7		Peak	Yes	Yes	trimedlure				Adult	clementines	sweet oranges (Citrus sinensis)
85	M T	Martinez-Ferrer	2010	Journal	Yes	Yes	Spain	Valencia		Valencia		Source							39.14	-0.28	Yes	No	No		P	2004	8		High	Yes	Yes	trimedlure				Adult	clementines	sweet oranges (Citrus sinensis)
85	M T	Martinez-Ferrer	2010	Journal	Yes	Yes	Spain	Valencia		Valencia		Source							39.14	-0.28	Yes	No	No		P	2004	9		Low	Yes	Yes	trimedlure				Adult	clementines	sweet oranges (Citrus sinensis)
85	M T	Martinez-Ferrer	2010	Journal	Yes	Yes	Spain	Valencia		Valencia		Source							39.14	-0.28	Yes	No	No		P	2004	10		Marginal	Yes	Yes	trimedlure				Adult	clementines	sweet oranges (Citrus sinensis)
85	M T	Martinez-Ferrer	2010	Journal	Yes	Yes	Spain	Valencia		Valencia		Source							39.14	-0.28	Yes	No	No		P	2004	11		Marginal	Yes	Yes	trimedlure				Adult	clementines	sweet oranges (Citrus sinensis)
85	M T	Martinez-Ferrer	2010	Journal	Yes	Yes	Spain	Valencia		Valencia		Source							39.14	-0.28	Yes	No	No		P	2004	12		None	No	Yes	trimedlure				Adult	clementines	sweet oranges (Citrus sinensis)
85	M T	Martinez-Ferrer	2010	Journal	Yes	Yes	Spain	Valencia		Valencia		Source							39.14	-0.28	Yes	No	No		P	2005	1		None	No	Yes	trimedlure				Adult	clementines	sweet oranges (Citrus sinensis)
85	M T	Martinez-Ferrer	2010	Journal	Yes	Yes	Spain	Valencia		Valencia		Source							39.14	-0.28	Yes	No	No		P	2005	2		None	No	Yes	trimedlure				Adult	clementines	sweet oranges (Citrus sinensis)
85	M T	Martinez-Ferrer	2010	Journal	Yes	Yes	Spain	Valencia		Valencia		Source							39.14	-0.28	Yes	No	No		P	2005	3		None	No	Yes	trimedlure				Adult	clementines	sweet oranges (Citrus sinensis)
85	M T	Martinez-Ferrer	2010	Journal	Yes	Yes	Spain	Valencia		Valencia		Source							39.14	-0.28	Yes	No	No		P	2005	4		None	No	Yes	trimedlure				Adult	clementines	sweet oranges (Citrus sinensis)
85	M T	Martinez-Ferrer	2010	Journal	Yes	Yes	Spain	Valencia		Valencia		Source							39.14	-0.28	Yes	No	No		P	2005	5		None	No	Yes	trimedlure				Adult	clementines	sweet oranges (Citrus sinensis)
85	M T	Martinez-Ferrer	2010	Journal	Yes	Yes	Spain	Valencia		Valencia		Source							39.14	-0.28	Yes	No	No		P	2005	6		Marginal	Yes	Yes	trimedlure				Adult	clementines	sweet oranges (Citrus sinensis)
85	M T	Martinez-Ferrer	2010	Journal	Yes	Yes	Spain	Valencia		Valencia		Source							39.14	-0.28	Yes	No	No		P	2005	7		High	Yes	Yes	trimedlure				Adult	clementines	sweet oranges (Citrus sinensis)
85	M T	Martinez-Ferrer	2010	Journal	Yes	Yes	Spain	Valencia		Valencia		Source							39.14	-0.28	Yes	No	No		P	2005	8		Peak	Yes	Yes	trimedlure				Adult	clementines	sweet oranges (Citrus sinensis)
85	M T	Martinez-Ferrer	2010	Journal	Yes	Yes	Spain	Valencia		Valencia		Source							39.14	-0.28	Yes	No	No		P	2005	9		High	Yes	Yes	trimedlure				Adult	clementines	sweet oranges (Citrus sinensis)
85	M T	Martinez-Ferrer	2010	Journal	Yes	Yes	Spain	Valencia		Valencia		Source							39.14	-0.28	Yes	No	No		P	2005	10		Low	Yes	Yes	trimedlure				Adult	clementines	sweet oranges (Citrus sinensis)
85	M T	Martinez-Ferrer	2010	Journal	Yes	Yes	Spain	Valencia		Valencia		Source							39.14	-0.28	Yes	No	No		P	2005	11		Low	Yes	Yes	trimedlure				Adult	clementines	sweet oranges (Citrus sinensis)
85	M T	Martinez-Ferrer	2010	Journal	Yes	Yes	Spain	Valencia		Valencia		Source							39.14	-0.28	Yes	No	No		P	2005	12		None	No	Yes	trimedlure				Adult	clementines	sweet oranges (Citrus sinensis)
85	M T	Martinez-Ferrer	2010	Journal	Yes	Yes	Spain	Valencia		Valencia		Source							39.14	-0.28	Yes	No	No		P	2006	1		None	No	No	trimedlure				Adult	clementines	sweet oranges (Citrus sinensis)
85	M T	Martinez-Ferrer	2010	Journal	Yes	Yes	Spain	Valencia		Valencia		Source							39.14	-0.28	Yes	No	No		P	2006	2		None	No	No	trimedlure				Adult	clementines	sweet oranges (Citrus sinensis)
85	M T	Martinez-Ferrer	2010	Journal	Yes	Yes	Spain	Valencia		Valencia		Source							39.14	-0.28	Yes	No	No		P	2006	3		None	No	No	trimedlure				Adult	clementines	sweet oranges (Citrus sinensis)
85	M T	Martinez-Ferrer	2010	Journal	Yes	Yes	Spain	Valencia		Valencia		Source							39.14	-0.28	Yes	No	No		P	2006	4		None	No	No	trimedlure				Adult	clementines	sweet oranges (Citrus sinensis)
85	M T	Martinez-Ferrer	2010	Journal	Yes	Yes	Spain	Valencia		Valencia		Source							39.14	-0.28	Yes	No	No		P	2006	5		Marginal	Yes	Yes	trimedlure				Adult	clementines	sweet oranges (Citrus sinensis)
85	M T	Martinez-Ferrer	2010	Journal	Yes	Yes	Spain	Valencia		Valencia		Source							39.14	-0.28	Yes	No	No		P	2006	6		Peak	Yes	Yes	trimedlure				Adult	clementines	sweet oranges (Citrus sinensis)
85	M T	Martinez-Ferrer	2010	Journal	Yes	Yes	Spain	Valencia		Valencia		Source							39.14	-0.28	Yes	No	No		P	2006	7		Peak	Yes	Yes	trimedlure				Adult	clementines	sweet oranges (Citrus sinensis)
85	M T	Martinez-Ferrer	2010	Journal	Yes	Yes	Spain	Valencia		Valencia		Source							39.14	-0.28	Yes	No	No		P	2006	8		High	Yes	Yes	trimedlure				Adult	clementines	sweet oranges (Citrus sinensis)
85	M T	Martinez-Ferrer	2010	Journal	Yes	Yes	Spain	Valencia		Valencia		Source							39.14	-0.28	Yes	No	No		P	2006	9		Low	Yes	Yes	trimedlure				Adult	clementines	sweet oranges (Citrus sinensis)
85	M T	Martinez-Ferrer	2010	Journal	Yes	Yes	Spain	Valencia		Valencia		Source							39.14	-0.28	Yes	No	No		P	2006	10		Marginal	Yes	Yes	trimedlure				Adult	clementines	sweet oranges (Citrus sinensis)
85	M T	Martinez-Ferrer	2010	Journal	Yes	Yes	Spain	Valencia		Valencia		Source							39.14	-0.28	Yes	No	No		P	2006	11		Marginal	Yes	Yes	trimedlure				Adult	clementines	sweet oranges (Citrus sinensis)
85	M T	Martinez-Ferrer	2010	Journal	Yes	Yes	Spain	Valencia		Valencia		Source							39.14	-0.28	Yes	No	No		P	2006	12		None	No	Yes	trimedlure				Adult	clementines	sweet oranges (Citrus sinensis)
85	M T	Martinez-Ferrer	2010	Journal	Yes	Yes	Spain	Valencia		Valencia		Source							39.14	-0.28	Yes	No	No		P	2007	1		None	No	Yes	trimedlure				Adult	clementines	sweet oranges (Citrus sinensis)
85	M T	Martinez-Ferrer	2010	Journal	Yes	Yes	Spain	Valencia		Valencia		Source							39.14	-0.28	Yes	No	No		P	2007	2		None	No	Yes	trimedlure				Adult	clementines	sweet oranges (Citrus sinensis)
85	M T	Martinez-Ferrer	2010	Journal	Yes	Yes	Spain	Valencia		Valencia		Source							39.14	-0.28	Yes	No	No		P	2007	3		None	No	Yes	trimedlure				Adult	clementines	sweet oranges (Citrus sinensis)
85	M T	Martinez-Ferrer	2010	Journal	Yes	Yes	Spain	Valencia		Valencia		Source							39.14	-0.28	Yes	No	No		P	2007	4		None	No	Yes	trimedlure				Adult	clementines	sweet oranges (Citrus sinensis)
85	M T	Martinez-Ferrer	2010	Journal	Yes	Yes	Spain	Valencia		Valencia		Source							39.14	-0.28	Yes	No	No		P	2007	5		Low	Yes	Yes	trimedlure				Adult	clementines	sweet oranges (Citrus sinensis)
85	M T	Martinez-Ferrer	2010	Journal	Yes	Yes	Spain	Valencia		Valencia		Source							39.14	-0.28	Yes	No	No		P	2007	6		Peak	Yes	Yes	trimedlure				Adult	clementines	sweet oranges (Citrus sinensis)
85	M T	Martinez-Ferrer	2010	Journal	Yes	Yes	Spain	Valencia		Valencia		Source							39.14	-0.28	Yes	No	No		P	2007	7		Peak	Yes	Yes	trimedlure				Adult	clementines	sweet oranges (Citrus sinensis)
85	M T	Martinez-Ferrer	2010	Journal	Yes	Yes	Spain	Valencia		Valencia		Source							39.14	-0.28	Yes	No	No		P	2007	8		Low	Yes	Yes	trimedlure				Adult	clementines	sweet oranges (Citrus sinensis)
85	M T	Martinez-Ferrer	2010	Journal	Yes	Yes	Spain	Valencia		Valencia		Source							39.14	-0.28	Yes	No	No		P	2007	9		Low	Yes	Yes	trimedlure				Adult	clementines	sweet oranges (Citrus sinensis)
85	M T	Martinez-Ferrer	2010	Journal	Yes	Yes	Spain	Valencia		Valencia		Source							39.14	-0.28	Yes	No	No		P	2007	10		Marginal	Yes	Yes	trimedlure				Adult	clementines	sweet oranges (Citrus sinensis)
85	M T	Martinez-Ferrer	2010	Journal	Yes	Yes	Spain	Valencia		Valencia		Source							39.14	-0.28	Yes	No	No		P	2007	11		Marginal	Yes	Yes	trimedlure				Adult	clementines	sweet oranges (Citrus sinensis)
85	M T	Martinez-Ferrer	2010	Journal	Yes	Yes	Spain	Valencia		Valencia		Source							39.14	-0.28	Yes	No	No		P	2007	12		None	No	Yes	trimedlure				Adult	clementines	sweet oranges (Citrus sinensis)
85	M T	Martinez-Ferrer	2010	Journal	Yes	Yes	Spain	Valencia		Valencia		Source							39.14	-0.28	Yes	No	No		P	2003	1		None	No	Yes	tripack				Adult	clementines	sweet oranges (Citrus sinensis)
85	M T	Martinez-Ferrer	2010	Journal	Yes	Yes	Spain	Valencia		Valencia		Source							39.14	-0.28	Yes	No	No		P	2003	2		None	No	Yes	tripack				Adult	clementines	sweet oranges (Citrus sinensis)
85	M T	Martinez-Ferrer	2010	Journal	Yes	Yes	Spain	Valencia		Valencia		Source							39.14	-0.28	Yes	No	No		P	2003	3		None	No	Yes	tripack				Adult	clementines	sweet oranges (Citrus sinensis)
85	M T	Martinez-Ferrer	2010	Journal	Yes	Yes	Spain	Valencia		Valencia		Source							39.14	-0.28	Yes	No	No		P	2003	4		Marginal	Yes	Yes	tripack				Adult	clementines	sweet oranges (Citrus sinensis)
85	M T	Martinez-Ferrer	2010	Journal	Yes	Yes	Spain	Valencia		Valencia		Source							39.14	-0.28	Yes	No	No		P	2003	5		Low	Yes	Yes	tripack				Adult	clementines	sweet oranges (Citrus sinensis)
85	M T	Martinez-Ferrer	2010	Journal	Yes	Yes	Spain	Valencia		Valencia		Source							39.14	-0.28	Yes	No	No		P	2003	6		High	Yes	Yes	tripack				Adult	clementines	sweet oranges (Citrus sinensis)
85	M T	Martinez-Ferrer	2010	Journal	Yes	Yes	Spain	Valencia		Valencia		Source							39.14	-0.28	Yes	No	No		P	2003	7		Peak	Yes	Yes	tripack				Adult	clementines	sweet oranges (Citrus sinensis)
85	M T	Martinez-Ferrer	2010	Journal	Yes	Yes	Spain	Valencia		Valencia		Source							39.14	-0.28	Yes	No	No		P	2003	8		High	Yes	Yes	tripack				Adult	clementines	sweet oranges (Citrus sinensis)
85	M T	Martinez-Ferrer	2010	Journal	Yes	Yes	Spain	Valencia		Valencia		Source							39.14	-0.28	Yes	No	No		P	2003	9		Low	Yes	Yes	tripack				Adult	clementines	sweet oranges (Citrus sinensis)
85	M T	Martinez-Ferrer	2010	Journal	Yes	Yes	Spain	Valencia		Valencia		Source							39.14	-0.28	Yes	No	No		P	2003	10		Low	Yes	Yes	tripack				Adult	clementines	sweet oranges (Citrus sinensis)
85	M T	Martinez-Ferrer	2010	Journal	Yes	Yes	Spain	Valencia		Valencia		Source							39.14	-0.28	Yes	No	No		P	2003	11		Marginal	Yes	Yes	tripack				Adult	clementines	sweet oranges (Citrus sinensis)
85	M T	Martinez-Ferrer	2010	Journal	Yes	Yes	Spain	Valencia		Valencia		Source							39.14	-0.28	Yes	No	No		P	2003	12		None	No	Yes	tripack				Adult	clementines	sweet oranges (Citrus sinensis)
85	M T	Martinez-Ferrer	2010	Journal	Yes	Yes	Spain	Valencia		Valencia		Source							39.14	-0.28	Yes	No	No		P	2004	1		None	No	Yes	tripack				Adult	clementines	sweet oranges (Citrus sinensis)
85	M T	Martinez-Ferrer	2010	Journal	Yes	Yes	Spain	Valencia		Valencia		Source							39.14	-0.28	Yes	No	No		P	2004	2		None	No	Yes	tripack				Adult	clementines	sweet oranges (Citrus sinensis)
85	M T	Martinez-Ferrer	2010	Journal	Yes	Yes	Spain	Valencia		Valencia		Source							39.14	-0.28	Yes	No	No		P	2004	3		None	No	Yes	tripack				Adult	clementines	sweet oranges (Citrus sinensis)
85	M T	Martinez-Ferrer	2010	Journal	Yes	Yes	Spain	Valencia		Valencia		Source							39.14	-0.28	Yes	No	No		P	2004	4		Low	Yes	Yes	tripack				Adult	clementines	sweet oranges (Citrus sinensis)
85	M T	Martinez-Ferrer	2010	Journal	Yes	Yes	Spain	Valencia		Valencia		Source							39.14	-0.28	Yes	No	No		P	2004	5		Marginal	Yes	Yes	tripack				Adult	clementines	sweet oranges (Citrus sinensis)
85	M T	Martinez-Ferrer	2010	Journal	Yes	Yes	Spain	Valencia		Valencia		Source							39.14	-0.28	Yes	No	No		P	2004	6		High	Yes	Yes	tripack				Adult	clementines	sweet oranges (Citrus sinensis)
85	M T	Martinez-Ferrer	2010	Journal	Yes	Yes	Spain	Valencia		Valencia		Source							39.14	-0.28	Yes	No	No		P	2004	7		Peak	Yes	Yes	tripack				Adult	clementines	sweet oranges (Citrus sinensis)
85	M T	Martinez-Ferrer	2010	Journal	Yes	Yes	Spain	Valencia		Valencia		Source							39.14	-0.28	Yes	No	No		P	2004	8		High	Yes	Yes	tripack				Adult	clementines	sweet oranges (Citrus sinensis)
85	M T	Martinez-Ferrer	2010	Journal	Yes	Yes	Spain	Valencia		Valencia		Source							39.14	-0.28	Yes	No	No		P	2004	9		Low	Yes	Yes	tripack				Adult	clementines	sweet oranges (Citrus sinensis)
85	M T	Martinez-Ferrer	2010	Journal	Yes	Yes	Spain	Valencia		Valencia		Source							39.14	-0.28	Yes	No	No		P	2004	10		Low	Yes	Yes	tripack				Adult	clementines	sweet oranges (Citrus sinensis)
85	M T	Martinez-Ferrer	2010	Journal	Yes	Yes	Spain	Valencia		Valencia		Source							39.14	-0.28	Yes	No	No		P	2004	11		Marginal	Yes	Yes	tripack				Adult	clementines	sweet oranges (Citrus sinensis)
85	M T	Martinez-Ferrer	2010	Journal	Yes	Yes	Spain	Valencia		Valencia		Source							39.14	-0.28	Yes	No	No		P	2004	12		None	No	Yes	tripack				Adult	clementines	sweet oranges (Citrus sinensis)
130	A	Sciarretta	2011	Journal	Yes	Yes	Italy	Central Italy	Latium	Rome		Source	41	47	18	12	34	6	41.7883	12.5683	Yes	No	No		P	2006	4		None	No	Yes	sticky traps of the delta type baited with trimedlure					peach	apple	apricot	pear	plum	kiwi
130	A	Sciarretta	2011	Journal	Yes	Yes	Italy	Central Italy	Latium	Rome		Source	41	47	18	12	34	6	41.7883	12.5683	Yes	No	No		P	2006	5		None	No	Yes	sticky traps of the delta type baited with trimedlure					peach	apple	apricot	pear	plum	kiwi
130	A	Sciarretta	2011	Journal	Yes	Yes	Italy	Central Italy	Latium	Rome		Source	41	47	18	12	34	6	41.7883	12.5683	Yes	No	No		P	2006	6		None	No	Yes	sticky traps of the delta type baited with trimedlure					peach	apple	apricot	pear	plum	kiwi
130	A	Sciarretta	2011	Journal	Yes	Yes	Italy	Central Italy	Latium	Rome		Source	41	47	18	12	34	6	41.7883	12.5683	Yes	No	No		P	2006	7		None	No	Yes	sticky traps of the delta type baited with trimedlure					peach	apple	apricot	pear	plum	kiwi
130	A	Sciarretta	2011	Journal	Yes	Yes	Italy	Central Italy	Latium	Rome		Source	41	47	18	12	34	6	41.7883	12.5683	Yes	No	No		P	2006	8		Low	Yes	Yes	sticky traps of the delta type baited with trimedlure					peach	apple	apricot	pear	plum	kiwi
130	A	Sciarretta	2011	Journal	Yes	Yes	Italy	Central Italy	Latium	Rome		Source	41	47	18	12	34	6	41.7883	12.5683	Yes	No	No		P	2006	9		Peak	Yes	Yes	sticky traps of the delta type baited with trimedlure					peach	apple	apricot	pear	plum	kiwi
130	A	Sciarretta	2011	Journal	Yes	Yes	Italy	Central Italy	Latium	Rome		Source	41	47	18	12	34	6	41.7883	12.5683	Yes	No	No		P	2006	10		Peak	Yes	Yes	sticky traps of the delta type baited with trimedlure					peach	apple	apricot	pear	plum	kiwi
130	A	Sciarretta	2011	Journal	Yes	Yes	Italy	Central Italy	Latium	Rome		Source	41	47	18	12	34	6	41.7883	12.5683	Yes	No	No		P	2006	11		High	Yes	Yes	sticky traps of the delta type baited with trimedlure					peach	apple	apricot	pear	plum	kiwi
130	A	Sciarretta	2011	Journal	Yes	Yes	Italy	Central Italy	Latium	Rome		Source	41	47	18	12	34	6	41.7883	12.5683	Yes	No	No		P	2006	12		Marginal	Yes	Yes	sticky traps of the delta type baited with trimedlure					peach	apple	apricot	pear	plum	kiwi
130	A	Sciarretta	2011	Journal	Yes	Yes	Italy	Central Italy	Latium	Rome		Source	41	47	18	12	34	6	41.7883	12.5683	Yes	No	No		P	2007	1		None	No	Yes	sticky traps of the delta type baited with trimedlure					peach	apple	apricot	pear	plum	kiwi
130	A	Sciarretta	2011	Journal	Yes	Yes	Italy	Central Italy	Latium	Rome		Source	41	47	18	12	34	6	41.7883	12.5683	Yes	No	No		P	2007	2		None	No	Yes	sticky traps of the delta type baited with trimedlure					peach	apple	apricot	pear	plum	kiwi
130	A	Sciarretta	2011	Journal	Yes	Yes	Italy	Central Italy	Latium	Rome		Source	41	47	18	12	34	6	41.7883	12.5683	Yes	No	No		P	2007	3		None	No	Yes	sticky traps of the delta type baited with trimedlure					peach	apple	apricot	pear	plum	kiwi
130	A	Sciarretta	2011	Journal	Yes	Yes	Italy	Central Italy	Latium	Rome		Source	41	47	18	12	34	6	41.7883	12.5683	Yes	No	No		P	2007	4		None	No	Yes	sticky traps of the delta type baited with trimedlure					peach	apple	apricot	pear	plum	kiwi
130	A	Sciarretta	2011	Journal	Yes	Yes	Italy	Central Italy	Latium	Rome		Source	41	47	18	12	34	6	41.7883	12.5683	Yes	No	No		P	2007	5		None	No	Yes	sticky traps of the delta type baited with trimedlure					peach	apple	apricot	pear	plum	kiwi
130	A	Sciarretta	2011	Journal	Yes	Yes	Italy	Central Italy	Latium	Rome		Source	41	47	18	12	34	6	41.7883	12.5683	Yes	No	No		P	2007	6		Marginal	Yes	Yes	sticky traps of the delta type baited with trimedlure					peach	apple	apricot	pear	plum	kiwi
130	A	Sciarretta	2011	Journal	Yes	Yes	Italy	Central Italy	Latium	Rome		Source	41	47	18	12	34	6	41.7883	12.5683	Yes	No	No		P	2007	7		High	Yes	Yes	sticky traps of the delta type baited with trimedlure					peach	apple	apricot	pear	plum	kiwi
130	A	Sciarretta	2011	Journal	Yes	Yes	Italy	Central Italy	Latium	Rome		Source	41	47	18	12	34	6	41.7883	12.5683	Yes	No	No		P	2007	8		Peak	Yes	Yes	sticky traps of the delta type baited with trimedlure					peach	apple	apricot	pear	plum	kiwi
130	A	Sciarretta	2011	Journal	Yes	Yes	Italy	Central Italy	Latium	Rome		Source	41	47	18	12	34	6	41.7883	12.5683	Yes	No	No		P	2007	9		High	Yes	Yes	sticky traps of the delta type baited with trimedlure					peach	apple	apricot	pear	plum	kiwi
130	A	Sciarretta	2011	Journal	Yes	Yes	Italy	Central Italy	Latium	Rome		Source	41	47	18	12	34	6	41.7883	12.5683	Yes	No	No		P	2007	10		Low	Yes	Yes	sticky traps of the delta type baited with trimedlure					peach	apple	apricot	pear	plum	kiwi
130	A	Sciarretta	2011	Journal	Yes	Yes	Italy	Central Italy	Latium	Rome		Source	41	47	18	12	34	6	41.7883	12.5683	Yes	No	No		P	2007	11		Low	Yes	Yes	sticky traps of the delta type baited with trimedlure					peach	apple	apricot	pear	plum	kiwi
130	A	Sciarretta	2011	Journal	Yes	Yes	Italy	Central Italy	Latium	Rome		Source	41	47	18	12	34	6	41.7883	12.5683	Yes	No	No		P	2007	12		None	No	Yes	sticky traps of the delta type baited with trimedlure					peach	apple	apricot	pear	plum	kiwi
130	A	Sciarretta	2011	Journal	Yes	Yes	Italy	Central Italy	Latium	Rome		Source	41	47	18	12	34	6	41.7883	12.5683	Yes	No	No		P	2008	1		None	No	Yes	sticky traps of the delta type baited with trimedlure					peach	apple	apricot	pear	plum	kiwi
130	A	Sciarretta	2011	Journal	Yes	Yes	Italy	Central Italy	Latium	Rome		Source	41	47	18	12	34	6	41.7883	12.5683	Yes	No	No		P	2008	2		None	No	Yes	sticky traps of the delta type baited with trimedlure					peach	apple	apricot	pear	plum	kiwi
130	A	Sciarretta	2011	Journal	Yes	Yes	Italy	Central Italy	Latium	Rome		Source	41	47	18	12	34	6	41.7883	12.5683	Yes	No	No		P	2008	3		None	No	Yes	sticky traps of the delta type baited with trimedlure					peach	apple	apricot	pear	plum	kiwi
130	A	Sciarretta	2011	Journal	Yes	Yes	Italy	Central Italy	Latium	Rome		Source	41	47	18	12	34	6	41.7883	12.5683	Yes	No	No		P	2008	4		None	No	Yes	sticky traps of the delta type baited with trimedlure					peach	apple	apricot	pear	plum	kiwi
130	A	Sciarretta	2011	Journal	Yes	Yes	Italy	Central Italy	Latium	Rome		Source	41	47	18	12	34	6	41.7883	12.5683	Yes	No	No		P	2008	5		None	No	Yes	sticky traps of the delta type baited with trimedlure					peach	apple	apricot	pear	plum	kiwi
130	A	Sciarretta	2011	Journal	Yes	Yes	Italy	Central Italy	Latium	Rome		Source	41	47	18	12	34	6	41.7883	12.5683	Yes	No	No		P	2008	6		None	No	Yes	sticky traps of the delta type baited with trimedlure					peach	apple	apricot	pear	plum	kiwi
130	A	Sciarretta	2011	Journal	Yes	Yes	Italy	Central Italy	Latium	Rome		Source	41	47	18	12	34	6	41.7883	12.5683	Yes	No	No		P	2008	7		None	No	Yes	sticky traps of the delta type baited with trimedlure					peach	apple	apricot	pear	plum	kiwi
130	A	Sciarretta	2011	Journal	Yes	Yes	Italy	Central Italy	Latium	Rome		Source	41	47	18	12	34	6	41.7883	12.5683	Yes	No	No		P	2008	8		High	Yes	Yes	sticky traps of the delta type baited with trimedlure					peach	apple	apricot	pear	plum	kiwi
130	A	Sciarretta	2011	Journal	Yes	Yes	Italy	Central Italy	Latium	Rome		Source	41	47	18	12	34	6	41.7883	12.5683	Yes	No	No		P	2008	9		Peak	Yes	Yes	sticky traps of the delta type baited with trimedlure					peach	apple	apricot	pear	plum	kiwi
130	A	Sciarretta	2011	Journal	Yes	Yes	Italy	Central Italy	Latium	Rome		Source	41	47	18	12	34	6	41.7883	12.5683	Yes	No	No		P	2008	10		High	Yes	Yes	sticky traps of the delta type baited with trimedlure					peach	apple	apricot	pear	plum	kiwi
130	A	Sciarretta	2011	Journal	Yes	Yes	Italy	Central Italy	Latium	Rome		Source	41	47	18	12	34	6	41.7883	12.5683	Yes	No	No		P	2008	11		Low	Yes	Yes	sticky traps of the delta type baited with trimedlure					peach	apple	apricot	pear	plum	kiwi
130	A	Sciarretta	2011	Journal	Yes	Yes	Italy	Central Italy	Latium	Rome		Source	41	47	18	12	34	6	41.7883	12.5683	Yes	No	No		P	2008	12		Marginal	Yes	Yes	sticky traps of the delta type baited with trimedlure					peach	apple	apricot	pear	plum	kiwi
82	D A	Maelzer	2004	Journal	Yes	Yes	Australia	South Australia		Adelaide		GoogleEarth	-34	54		138	39		-34.9	138.65	No	No	Yes		T		1		High	Yes	No		200
82	D A	Maelzer	2004	Journal	Yes	Yes	Australia	South Australia		Adelaide		GoogleEarth	-34	54		138	39		-34.9	138.65	No	No	Yes		T		2		Peak	Yes	No		230
82	D A	Maelzer	2004	Journal	Yes	Yes	Australia	South Australia		Adelaide		GoogleEarth	-34	54		138	39		-34.9	138.65	No	No	Yes		T		3		High	Yes	No		140
82	D A	Maelzer	2004	Journal	Yes	Yes	Australia	South Australia		Adelaide		GoogleEarth	-34	54		138	39		-34.9	138.65	No	No	Yes		T		4		High	Yes	No		130
82	D A	Maelzer	2004	Journal	Yes	Yes	Australia	South Australia		Adelaide		GoogleEarth	-34	54		138	39		-34.9	138.65	No	No	Yes		T		5		High	Yes	No		80
82	D A	Maelzer	2004	Journal	Yes	Yes	Australia	South Australia		Adelaide		GoogleEarth	-34	54		138	39		-34.9	138.65	No	No	Yes		T		6		High	Yes	No		90
82	D A	Maelzer	2004	Journal	Yes	Yes	Australia	South Australia		Adelaide		GoogleEarth	-34	54		138	39		-34.9	138.65	No	No	Yes		T		7		Low	Yes	No		10
82	D A	Maelzer	2004	Journal	Yes	Yes	Australia	South Australia		Adelaide		GoogleEarth	-34	54		138	39		-34.9	138.65	No	No	Yes		T		8		None	No	No		0
82	D A	Maelzer	2004	Journal	Yes	Yes	Australia	South Australia		Adelaide		GoogleEarth	-34	54		138	39		-34.9	138.65	No	No	Yes		T		9		None	No	No		0
82	D A	Maelzer	2004	Journal	Yes	Yes	Australia	South Australia		Adelaide		GoogleEarth	-34	54		138	39		-34.9	138.65	No	No	Yes		T		10		None	No	No		0
82	D A	Maelzer	2004	Journal	Yes	Yes	Australia	South Australia		Adelaide		GoogleEarth	-34	54		138	39		-34.9	138.65	No	No	Yes		T		11		None	No	No		0
82	D A	Maelzer	2004	Journal	Yes	Yes	Australia	South Australia		Adelaide		GoogleEarth	-34	54		138	39		-34.9	138.65	No	No	Yes		T		12		High	Yes	No		120
158	C	Zeki	2008	Journal	Yes	Yes	Turkey	Isparta	Egirdir	Tepeli		GoogleEarth	37	46	33	30	53	8	37.7758	30.8856	No	Yes	No		P					Yes	No						peach
158	C	Zeki	2008	Journal	Yes	Yes	Turkey	Isparta	Egirdir	Yukarigokdere		GoogleEarth	37	41	51	30	51	25	37.6975	30.8569	No	Yes	No		P					Yes	No						peach
158	C	Zeki	2008	Journal	Yes	Yes	Turkey	Isparta		Gonen		GoogleEarth	37	57	21	30	30	54	37.9558	30.515	No	Yes	No		P					Yes	No						peach
158	C	Zeki	2008	Journal	Yes	Yes	Turkey	Isparta	Central	Buyukgokceli		GoogleEarth	37	52	17	30	43	50	37.8714	30.7306	No	Yes	No		P					Yes	No						peach	apple
158	C	Zeki	2008	Journal	Yes	Yes	Turkey	Isparta	Sav	Yazisogut		GoogleEarth	37	46	38	30	36	12	37.7772	30.6033	No	Yes	No		P					Yes	No						peach	apple
158	C	Zeki	2008	Journal	Yes	Yes	Turkey	Isparta	Sav	Central		GoogleEarth							#DIV/0!	#DIV/0!	No	Yes	No		P					Yes	No						peach	apple
158	C	Zeki	2008	Journal	Yes	Yes	Turkey	Burdur	Bucak	Gundogdu		GoogleEarth	37	19	36	30	33	22	37.3267	30.5561	No	Yes	No		P					Yes	No						peach	apple	pear	quince
158	C	Zeki	2008	Journal	Yes	Yes	Turkey	Burdur	Bucak	Karapinar		GoogleEarth	37	21	31	30	32	2	37.3586	30.5339	No	Yes	No		P					Yes	No						apple
158	C	Zeki	2008	Journal	Yes	Yes	Turkey	Burdur	Central	Kurucay		GoogleEarth	37	38	35	30	9	58	37.6431	30.1661	No	Yes	No		P					Yes	No						peach
158	C	Zeki	2008	Journal	Yes	Yes	Turkey	Burdur	Central	Duger		GoogleEarth	37	34	51	30	1	28	37.5808	30.0244	No	Yes	No		P					Yes	No						peach
158	C	Zeki	2008	Journal	Yes	Yes	Turkey	Burdur	Bucak	Gundogdu		GoogleEarth	37	19	36	30	33	22	37.3267	30.5561	No	Yes	No		P	2000	1			No	Yes	Jackson trap pheromone					peach	apple	pear	quince
158	C	Zeki	2008	Journal	Yes	Yes	Turkey	Burdur	Bucak	Gundogdu		GoogleEarth	37	19	36	30	33	22	37.3267	30.5561	No	Yes	No		P	2000	2			No	Yes	Jackson trap pheromone					peach	apple	pear	quince
158	C	Zeki	2008	Journal	Yes	Yes	Turkey	Burdur	Bucak	Gundogdu		GoogleEarth	37	19	36	30	33	22	37.3267	30.5561	No	Yes	No		P	2000	3			No	Yes	Jackson trap pheromone					peach	apple	pear	quince
158	C	Zeki	2008	Journal	Yes	Yes	Turkey	Burdur	Bucak	Gundogdu		GoogleEarth	37	19	36	30	33	22	37.3267	30.5561	No	Yes	No		P	2000	4			No	Yes	Jackson trap pheromone					peach	apple	pear	quince
158	C	Zeki	2008	Journal	Yes	Yes	Turkey	Burdur	Bucak	Gundogdu		GoogleEarth	37	19	36	30	33	22	37.3267	30.5561	No	Yes	No		P	2000	5			No	Yes	Jackson trap pheromone					peach	apple	pear	quince
158	C	Zeki	2008	Journal	Yes	Yes	Turkey	Burdur	Bucak	Gundogdu		GoogleEarth	37	19	36	30	33	22	37.3267	30.5561	No	Yes	No		P	2000	6			No	Yes	Jackson trap pheromone					peach	apple	pear	quince
158	C	Zeki	2008	Journal	Yes	Yes	Turkey	Burdur	Bucak	Gundogdu		GoogleEarth	37	19	36	30	33	22	37.3267	30.5561	No	Yes	No		P	2000	7			No	Yes	Jackson trap pheromone					peach	apple	pear	quince
158	C	Zeki	2008	Journal	Yes	Yes	Turkey	Burdur	Bucak	Gundogdu		GoogleEarth	37	19	36	30	33	22	37.3267	30.5561	No	Yes	No		P	2000	8			Yes	Yes	Jackson trap pheromone					peach	apple	pear	quince
158	C	Zeki	2008	Journal	Yes	Yes	Turkey	Burdur	Bucak	Gundogdu		GoogleEarth	37	19	36	30	33	22	37.3267	30.5561	No	Yes	No		P	2000	9			Yes	Yes	Jackson trap pheromone					peach	apple	pear	quince
158	C	Zeki	2008	Journal	Yes	Yes	Turkey	Burdur	Bucak	Gundogdu		GoogleEarth	37	19	36	30	33	22	37.3267	30.5561	No	Yes	No		P	2000	10			Yes	Yes	Jackson trap pheromone					peach	apple	pear	quince
158	C	Zeki	2008	Journal	Yes	Yes	Turkey	Burdur	Bucak	Gundogdu		GoogleEarth	37	19	36	30	33	22	37.3267	30.5561	No	Yes	No		P	2000	11			Yes	Yes	Jackson trap pheromone					peach	apple	pear	quince
158	C	Zeki	2008	Journal	Yes	Yes	Turkey	Burdur	Bucak	Gundogdu		GoogleEarth	37	19	36	30	33	22	37.3267	30.5561	No	Yes	No		P	2000	12			No	Yes	Jackson trap pheromone					peach	apple	pear	quince
158	C	Zeki	2008	Journal	Yes	Yes	Turkey	Burdur	Bucak	Gundogdu		GoogleEarth	37	19	36	30	33	22	37.3267	30.5561	No	Yes	No		P	2001	1			No	Yes	Jackson trap pheromone					peach	apple	pear	quince
158	C	Zeki	2008	Journal	Yes	Yes	Turkey	Burdur	Bucak	Gundogdu		GoogleEarth	37	19	36	30	33	22	37.3267	30.5561	No	Yes	No		P	2001	2			No	Yes	Jackson trap pheromone					peach	apple	pear	quince
158	C	Zeki	2008	Journal	Yes	Yes	Turkey	Burdur	Bucak	Gundogdu		GoogleEarth	37	19	36	30	33	22	37.3267	30.5561	No	Yes	No		P	2001	3			No	Yes	Jackson trap pheromone					peach	apple	pear	quince
158	C	Zeki	2008	Journal	Yes	Yes	Turkey	Burdur	Bucak	Gundogdu		GoogleEarth	37	19	36	30	33	22	37.3267	30.5561	No	Yes	No		P	2001	4			No	Yes	Jackson trap pheromone					peach	apple	pear	quince
158	C	Zeki	2008	Journal	Yes	Yes	Turkey	Burdur	Bucak	Gundogdu		GoogleEarth	37	19	36	30	33	22	37.3267	30.5561	No	Yes	No		P	2001	5			No	Yes	Jackson trap pheromone					peach	apple	pear	quince
158	C	Zeki	2008	Journal	Yes	Yes	Turkey	Burdur	Bucak	Gundogdu		GoogleEarth	37	19	36	30	33	22	37.3267	30.5561	No	Yes	No		P	2001	6			No	Yes	Jackson trap pheromone					peach	apple	pear	quince
158	C	Zeki	2008	Journal	Yes	Yes	Turkey	Burdur	Bucak	Gundogdu		GoogleEarth	37	19	36	30	33	22	37.3267	30.5561	No	Yes	No		P	2001	7			Yes	Yes	Jackson trap pheromone					peach	apple	pear	quince
158	C	Zeki	2008	Journal	Yes	Yes	Turkey	Burdur	Bucak	Gundogdu		GoogleEarth	37	19	36	30	33	22	37.3267	30.5561	No	Yes	No		P	2001	8			Yes	Yes	Jackson trap pheromone					peach	apple	pear	quince
158	C	Zeki	2008	Journal	Yes	Yes	Turkey	Burdur	Bucak	Gundogdu		GoogleEarth	37	19	36	30	33	22	37.3267	30.5561	No	Yes	No		P	2001	9			Yes	Yes	Jackson trap pheromone					peach	apple	pear	quince
158	C	Zeki	2008	Journal	Yes	Yes	Turkey	Burdur	Bucak	Gundogdu		GoogleEarth	37	19	36	30	33	22	37.3267	30.5561	No	Yes	No		P	2001	10			Yes	Yes	Jackson trap pheromone					peach	apple	pear	quince
158	C	Zeki	2008	Journal	Yes	Yes	Turkey	Burdur	Bucak	Gundogdu		GoogleEarth	37	19	36	30	33	22	37.3267	30.5561	No	Yes	No		P	2001	11			Yes	Yes	Jackson trap pheromone					peach	apple	pear	quince
158	C	Zeki	2008	Journal	Yes	Yes	Turkey	Burdur	Bucak	Gundogdu		GoogleEarth	37	19	36	30	33	22	37.3267	30.5561	No	Yes	No		P	2001	12			No	Yes	Jackson trap pheromone					peach	apple	pear	quince
158	C	Zeki	2008	Journal	Yes	Yes	Turkey	Burdur	Bucak	Gundogdu		GoogleEarth	37	19	36	30	33	22	37.3267	30.5561	No	Yes	No		P	2002	1			No	Yes	Jackson trap pheromone					peach	apple	pear	quince
158	C	Zeki	2008	Journal	Yes	Yes	Turkey	Burdur	Bucak	Gundogdu		GoogleEarth	37	19	36	30	33	22	37.3267	30.5561	No	Yes	No		P	2002	2			No	Yes	Jackson trap pheromone					peach	apple	pear	quince
158	C	Zeki	2008	Journal	Yes	Yes	Turkey	Burdur	Bucak	Gundogdu		GoogleEarth	37	19	36	30	33	22	37.3267	30.5561	No	Yes	No		P	2002	3			No	Yes	Jackson trap pheromone					peach	apple	pear	quince
158	C	Zeki	2008	Journal	Yes	Yes	Turkey	Burdur	Bucak	Gundogdu		GoogleEarth	37	19	36	30	33	22	37.3267	30.5561	No	Yes	No		P	2002	4			No	Yes	Jackson trap pheromone					peach	apple	pear	quince
158	C	Zeki	2008	Journal	Yes	Yes	Turkey	Burdur	Bucak	Gundogdu		GoogleEarth	37	19	36	30	33	22	37.3267	30.5561	No	Yes	No		P	2002	5			No	Yes	Jackson trap pheromone					peach	apple	pear	quince
158	C	Zeki	2008	Journal	Yes	Yes	Turkey	Burdur	Bucak	Gundogdu		GoogleEarth	37	19	36	30	33	22	37.3267	30.5561	No	Yes	No		P	2002	6			No	Yes	Jackson trap pheromone					peach	apple	pear	quince
158	C	Zeki	2008	Journal	Yes	Yes	Turkey	Burdur	Bucak	Gundogdu		GoogleEarth	37	19	36	30	33	22	37.3267	30.5561	No	Yes	No		P	2002	7			Yes	Yes	Jackson trap pheromone					peach	apple	pear	quince
158	C	Zeki	2008	Journal	Yes	Yes	Turkey	Burdur	Bucak	Gundogdu		GoogleEarth	37	19	36	30	33	22	37.3267	30.5561	No	Yes	No		P	2002	8			Yes	Yes	Jackson trap pheromone					peach	apple	pear	quince
158	C	Zeki	2008	Journal	Yes	Yes	Turkey	Burdur	Bucak	Gundogdu		GoogleEarth	37	19	36	30	33	22	37.3267	30.5561	No	Yes	No		P	2002	9			Yes	Yes	Jackson trap pheromone					peach	apple	pear	quince
158	C	Zeki	2008	Journal	Yes	Yes	Turkey	Burdur	Bucak	Gundogdu		GoogleEarth	37	19	36	30	33	22	37.3267	30.5561	No	Yes	No		P	2002	10			Yes	Yes	Jackson trap pheromone					peach	apple	pear	quince
158	C	Zeki	2008	Journal	Yes	Yes	Turkey	Burdur	Bucak	Gundogdu		GoogleEarth	37	19	36	30	33	22	37.3267	30.5561	No	Yes	No		P	2002	11			Yes	Yes	Jackson trap pheromone					peach	apple	pear	quince
158	C	Zeki	2008	Journal	Yes	Yes	Turkey	Burdur	Bucak	Gundogdu		GoogleEarth	37	19	36	30	33	22	37.3267	30.5561	No	Yes	No		P	2002	12			No	Yes	Jackson trap pheromone					peach	apple	pear	quince
157	A	Zaborowski	2008	Conference	Yes	Yes	France	Corsica		Corsica		GoogleEarth	42			9			42	9	No	No	Yes		P	2006	9		High	Yes	Yes
157	A	Zaborowski	2008	Conference	Yes	Yes	France	Corsica		Corsica		GoogleEarth	42			9			42	9	No	Yes	No		P	2006	10		High	Yes	Yes
157	A	Zaborowski	2008	Conference	Yes	Yes	France	Corsica		Corsica		GoogleEarth	42			9			42	9	No	Yes	No		P	2006	11		Peak	Yes	Yes
157	A	Zaborowski	2008	Conference	Yes	Yes	France	Corsica		Corsica		GoogleEarth	42			9			42	9	No	Yes	No		P	2006	12		Marginal	Yes	Yes
157	A	Zaborowski	2008	Conference	Yes	Yes	France	Corsica		Corsica		GoogleEarth	42			9			42	9	No	Yes	No		P	2007	7		Peak	Yes	Yes
157	A	Zaborowski	2008	Conference	Yes	Yes	France	Corsica		Corsica		GoogleEarth	42			9			42	9	No	Yes	No		P	2007	8		High	Yes	Yes
157	A	Zaborowski	2008	Conference	Yes	Yes	France	Corsica		Corsica		GoogleEarth	42			9			42	9	No	Yes	No		P	2007	9		Low	Yes	Yes
157	A	Zaborowski	2008	Conference	Yes	Yes	France	Corsica		Corsica		GoogleEarth	42			9			42	9	No	Yes	No		P	2007	10		High	Yes	Yes
157	A	Zaborowski	2008	Conference	Yes	Yes	France	Corsica		Corsica		GoogleEarth	42			9			42	9	No	Yes	No		P	2007	11		Low	Yes	Yes
157	A	Zaborowski	2008	Conference	Yes	Yes	France	Corsica		Corsica		GoogleEarth	42			9			42	9	No	Yes	No		P	2007	12		Marginal	Yes	Yes
84	A R	Malacrida	1998	Journal	Yes	Yes	Kenya			Kenya		GoogleEarth	0			38			0	38	No	No	Yes		P						No
84	A R	Malacrida	1998	Journal	Yes	Yes	Reunion			Reunion		GoogleEarth	-21			55	20		-21	55.3333	No	No	Yes		P						No
84	A R	Malacrida	1998	Journal	Yes	Yes	Morocco			Morocco		GoogleEarth							#DIV/0!	#DIV/0!	No	No	Yes		P						No
84	A R	Malacrida	1998	Journal	Yes	Yes	Spain			Canary		GoogleEarth							#DIV/0!	#DIV/0!	No	No	Yes		P						No
84	A R	Malacrida	1998	Journal	Yes	Yes	Portugal			Madeira		GoogleEarth							#DIV/0!	#DIV/0!	No	No	Yes		P						No
84	A R	Malacrida	1998	Journal	Yes	Yes	Spain			Spain		GoogleEarth							#DIV/0!	#DIV/0!	No	No	Yes		P						No
84	A R	Malacrida	1998	Journal	Yes	Yes	Italy			Sardinia		GoogleEarth							#DIV/0!	#DIV/0!	No	No	Yes		P						No
84	A R	Malacrida	1998	Journal	Yes	Yes	Italy			Procida		GoogleEarth							#DIV/0!	#DIV/0!	No	No	Yes		P						No
84	A R	Malacrida	1998	Journal	Yes	Yes	Italy			North Italy		GoogleEarth							#DIV/0!	#DIV/0!	No	No	Yes		P						No
84	A R	Malacrida	1998	Journal	Yes	Yes	Libya			Libya		GoogleEarth							#DIV/0!	#DIV/0!	No	No	Yes		P						No
84	A R	Malacrida	1998	Journal	Yes	Yes	Israel			Israel		GoogleEarth							#DIV/0!	#DIV/0!	No	No	Yes		P						No
84	A R	Malacrida	1998	Journal	Yes	Yes	Greece			Crete		GoogleEarth							#DIV/0!	#DIV/0!	No	No	Yes		P						No
84	A R	Malacrida	1998	Journal	Yes	Yes	Greece			Chios		GoogleEarth							#DIV/0!	#DIV/0!	No	No	Yes		P						No
84	A R	Malacrida	1998	Journal	Yes	Yes	Greece			Greece		GoogleEarth							#DIV/0!	#DIV/0!	No	No	Yes		P						No
84	A R	Malacrida	1998	Journal	Yes	Yes	Hawaii			Hawaii		GoogleEarth							#DIV/0!	#DIV/0!	No	No	Yes		P						No
84	A R	Malacrida	1998	Journal	Yes	Yes	Guatemala			Guatemala		GoogleEarth							#DIV/0!	#DIV/0!	No	No	Yes		P						No
84	A R	Malacrida	1998	Journal	Yes	Yes	Australia			Australia		GoogleEarth							#DIV/0!	#DIV/0!	No	No	Yes		P						No
88	A	Meats	2007	Journal	Yes	Yes	Australia		Adelaide	Aberfoyle Park		GoogleEarth	-35	4	38	138	35	35	-35.0772	138.593	No	Yes	No		P	2001	12				Yes
88	A	Meats	2007	Journal	Yes	Yes	Australia		Adelaide	Urrbrae		GoogleEarth	-34	57	50	138	38	17	-34.9639	138.638	No	Yes	No		P	2001	12				Yes
88	A	Meats	2007	Journal	Yes	Yes	Australia		Adelaide	Morphettville		GoogleEarth	-34	59	18	138	32	20	-34.9883	138.539	No	Yes	No		P	2001	12				Yes
89	A L	Madeiros	2007	Journal	Yes	Yes	Azores			Sao Miguel Island		Source	37	42		-25	9		37.7	-25.15	Yes	No	No		P		1				No
89	A L	Madeiros	2007	Journal	Yes	Yes	Azores			Sao Miguel Island		Source	37	42		-25	9		37.9167	-25.6833	No	Yes	No		P		2				No
89	A L	Madeiros	2007	Journal	Yes	Yes	Azores			Sao Miguel Island		Source	37	42		-25	9		37.7	-25.15	No	Yes	No		P		3				No
89	A L	Madeiros	2007	Journal	Yes	Yes	Azores			Sao Miguel Island		Source	37	42		-25	9		37.7	-25.15	No	Yes	No		P		4				No
89	A L	Madeiros	2007	Journal	Yes	Yes	Azores			Sao Miguel Island		Source	37	42		-25	9		37.7	-25.15	No	Yes	No		P		5				No
89	A L	Madeiros	2007	Journal	Yes	Yes	Azores			Sao Miguel Island		Source	37	42		-25	9		37.7	-25.15	No	Yes	No		P		6				No
89	A L	Madeiros	2007	Journal	Yes	Yes	Azores			Sao Miguel Island		Source	37	42		-25	9		37.7	-25.15	No	Yes	No		P		7				No
89	A L	Madeiros	2007	Journal	Yes	Yes	Azores			Sao Miguel Island		Source	37	42		-25	9		37.7	-25.15	No	Yes	No		P		8				No
89	A L	Madeiros	2007	Journal	Yes	Yes	Azores			Sao Miguel Island		Source	37	42		-25	9		37.7	-25.15	No	Yes	No		P		9				No
89	A L	Madeiros	2007	Journal	Yes	Yes	Azores			Sao Miguel Island		Source	37	42		-25	9		37.7	-25.15	No	Yes	No		P		10				No
89	A L	Madeiros	2007	Journal	Yes	Yes	Azores			Sao Miguel Island		Source	37	42		-25	9		37.7	-25.15	No	Yes	No		P		11				No
89	A L	Madeiros	2007	Journal	Yes	Yes	Azores			Sao Miguel Island		Source	37	42		-25	9		37.7	-25.15	No	Yes	No		P		12				No
89	A L	Madeiros	2007	Journal	Yes	Yes	Azores			Sao Miguel Island		Source	37	55		-25	41		37.9167	-25.6833	No	Yes	No		P		1				No
89	A L	Madeiros	2007	Journal	Yes	Yes	Azores			Sao Miguel Island		Source	37	55		-25	41		37.9167	-25.6833	No	Yes	No		P		2				No
89	A L	Madeiros	2007	Journal	Yes	Yes	Azores			Sao Miguel Island		Source	37	55		-25	41		37.9167	-25.6833	No	Yes	No		P		3				No
89	A L	Madeiros	2007	Journal	Yes	Yes	Azores			Sao Miguel Island		Source	37	55		-25	41		37.9167	-25.6833	No	Yes	No		P		4				No
89	A L	Madeiros	2007	Journal	Yes	Yes	Azores			Sao Miguel Island		Source	37	55		-25	41		37.9167	-25.6833	No	Yes	No		P		5				No
89	A L	Madeiros	2007	Journal	Yes	Yes	Azores			Sao Miguel Island		Source	37	55		-25	41		37.9167	-25.6833	No	Yes	No		P		6				No
89	A L	Madeiros	2007	Journal	Yes	Yes	Azores			Sao Miguel Island		Source	37	55		-25	41		37.9167	-25.6833	No	Yes	No		P		7				No
89	A L	Madeiros	2007	Journal	Yes	Yes	Azores			Sao Miguel Island		Source	37	55		-25	41		37.9167	-25.6833	No	Yes	No		P		8				No
89	A L	Madeiros	2007	Journal	Yes	Yes	Azores			Sao Miguel Island		Source	37	55		-25	41		37.9167	-25.6833	No	Yes	No		P		9				No
89	A L	Madeiros	2007	Journal	Yes	Yes	Azores			Sao Miguel Island		Source	37	55		-25	41		37.9167	-25.6833	No	Yes	No		P		10				No
89	A L	Madeiros	2007	Journal	Yes	Yes	Azores			Sao Miguel Island		Source	37	55		-25	41		37.9167	-25.6833	No	Yes	No		P		11				No
89	A L	Madeiros	2007	Journal	Yes	Yes	Azores			Sao Miguel Island		Source	37	55		-25	41		37.9167	-25.6833	No	Yes	No		P		12				No
94	N	Mkize	2008	Journal	Yes	Yes	South Africa			Grahamstown		GoogleEarth	-33	18		26	31		-33.3	26.5167	No	Yes	No		P						No
102	C	Nyamukondiwa	2009	Journal	Yes	Yes	South Africa	Western Cape		Stellenbosh		GoogleEarth	-33	55	23	18	51	54	-33.9231	18.865	No	Yes	No		P	2006	12				Yes
102	C	Nyamukondiwa	2009	Journal	Yes	Yes	South Africa	Western Cape		Stellenbosh		GoogleEarth	-33	55	23	18	51	54	-33.9231	18.865	No	Yes	No		P	2007	1				Yes
102	C	Nyamukondiwa	2009	Journal	Yes	Yes	South Africa	Western Cape		Stellenbosh		GoogleEarth	-33	55	23	18	51	54	-33.9231	18.865	No	Yes	No		P	2007	2				Yes
102	C	Nyamukondiwa	2009	Journal	Yes	Yes	South Africa	Western Cape		Stellenbosh		GoogleEarth	-33	55	23	18	51	54	-33.9231	18.865	No	Yes	No		P	2007	3				Yes
104	L E	Orono	2006	Journal	Yes	Yes	Argentina			Buenos Aires									#DIV/0!	#DIV/0!	No	Yes	No								No						Kiwi	Persimmon	Fig	False Guava
104	L E	Orono	2006	Journal	Yes	Yes	Argentina			Tucuman									#DIV/0!	#DIV/0!	No	Yes	No								No						mango	tuna	Persimmon	Walnut	Fig	Cherry	Mato	Guava
104	L E	Orono	2006	Journal	Yes	Yes	Argentina			Entre Rios									#DIV/0!	#DIV/0!	No	Yes	No								No						mango	Guava
104	L E	Orono	2006	Journal	Yes	Yes	Argentina			La Rioja									#DIV/0!	#DIV/0!	No	Yes	No								No						Tuna	Persimmon	Fig	False Guava
104	L E	Orono	2006	Journal	Yes	Yes	Argentina			Corrientes									#DIV/0!	#DIV/0!	No	Yes	No								No						Papaya	Walnut	Fig	Ubajay	Guava
104	L E	Orono	2006	Journal	Yes	Yes	Argentina			Misiones									#DIV/0!	#DIV/0!	No	Yes	No								No						Papaya	Persimmon	Guava
104	L E	Orono	2006	Journal	Yes	Yes	Argentina			Salta									#DIV/0!	#DIV/0!	No	Yes	No								No						Papaya	Guava
104	L E	Orono	2006	Journal	Yes	Yes	Argentina			Chaco									#DIV/0!	#DIV/0!	No	Yes	No								No						Papaya	Guava
104	L E	Orono	2006	Journal	Yes	Yes	Argentina			Cordoba									#DIV/0!	#DIV/0!	No	Yes	No								No						Persimmon
104	L E	Orono	2006	Journal	Yes	Yes	Argentina			Catamarca									#DIV/0!	#DIV/0!	No	Yes	No								No						Fig
104	L E	Orono	2006	Journal	Yes	Yes	Argentina			Jujuy									#DIV/0!	#DIV/0!	No	Yes	No								No						Guava
104	L E	Orono	2006	Journal	Yes	Yes	Argentina			Santa Fe									#DIV/0!	#DIV/0!	No	Yes	No								No
104	L E	Orono	2006	Journal	Yes	Yes	Argentina			San Luis									#DIV/0!	#DIV/0!	No	Yes	No								No
112	N T	Papadopoulos	2001	Journal	Yes	Yes	Greece			Thessaloniki		Source	40	3		22	5		40.05	22.0833	Yes	No	No		P	1991	1		None	No	Yes	Jackson traps with trimedlure				Adult	peach	apricots	fig	apples	pome fruit
112	N T	Papadopoulos	2001	Journal	Yes	Yes	Greece			Thessaloniki		Source	40	3		22	5		40.05	22.0833	Yes	No	No		P	1991	2		None	No	Yes	Jackson traps with trimedlure				Adult	peach	apricots	fig	apples	pome fruit
112	N T	Papadopoulos	2001	Journal	Yes	Yes	Greece			Thessaloniki		Source	40	3		22	5		40.05	22.0833	Yes	No	No		P	1991	3		None	No	Yes	Jackson traps with trimedlure				Adult	peach	apricots	fig	apples	pome fruit
112	N T	Papadopoulos	2001	Journal	Yes	Yes	Greece			Thessaloniki		Source	40	3		22	5		40.05	22.0833	Yes	No	No		P	1991	4		None	No	Yes	Jackson traps with trimedlure				Adult	peach	apricots	fig	apples	pome fruit
112	N T	Papadopoulos	2001	Journal	Yes	Yes	Greece			Thessaloniki		Source	40	3		22	5		40.05	22.0833	Yes	No	No		P	1991	5		None	No	Yes	Jackson traps with trimedlure				Adult	peach	apricots	fig	apples	pome fruit
112	N T	Papadopoulos	2001	Journal	Yes	Yes	Greece			Thessaloniki		Source	40	3		22	5		40.05	22.0833	Yes	No	No		P	1991	6		None	No	Yes	Jackson traps with trimedlure				Adult	peach	apricots	fig	apples	pome fruit
112	N T	Papadopoulos	2001	Journal	Yes	Yes	Greece			Thessaloniki		Source	40	3		22	5		40.05	22.0833	Yes	No	No		P	1991	7		None	No	Yes	Jackson traps with trimedlure				Adult	peach	apricots	fig	apples	pome fruit
112	N T	Papadopoulos	2001	Journal	Yes	Yes	Greece			Thessaloniki		Source	40	3		22	5		40.05	22.0833	Yes	No	No		P	1991	8	17	Marginal	Yes	Yes	Jackson traps with trimedlure				Adult	peach	apricots	fig	apples	pome fruit
112	N T	Papadopoulos	2001	Journal	Yes	Yes	Greece			Thessaloniki		Source	40	3		22	5		40.05	22.0833	Yes	No	No		P	1991	9		Low	Yes	Yes	Jackson traps with trimedlure				Adult	peach	apricots	fig	apples	pome fruit
112	N T	Papadopoulos	2001	Journal	Yes	Yes	Greece			Thessaloniki		Source	40	3		22	5		40.05	22.0833	Yes	No	No		P	1991	10		High	Yes	Yes	Jackson traps with trimedlure				Adult	peach	apricots	fig	apples	pome fruit
112	N T	Papadopoulos	2001	Journal	Yes	Yes	Greece			Thessaloniki		Source	40	3		22	5		40.05	22.0833	Yes	No	No		P	1991	11		Peak	Yes	Yes	Jackson traps with trimedlure				Adult	peach	apricots	fig	apples	pome fruit
112	N T	Papadopoulos	2001	Journal	Yes	Yes	Greece			Thessaloniki		Source	40	3		22	5		40.05	22.0833	Yes	No	No		P	1991	12		Marginal	Yes	Yes	Jackson traps with trimedlure				Adult	peach	apricots	fig	apples	pome fruit
112	N T	Papadopoulos	2001	Journal	Yes	Yes	Greece			Thessaloniki		Source	40	3		22	5		40.05	22.0833	Yes	No	No		P	1992	1		None	No	Yes	Jackson traps with trimedlure				Adult	peach	apricots	fig	apples	pome fruit
112	N T	Papadopoulos	2001	Journal	Yes	Yes	Greece			Thessaloniki		Source	40	3		22	5		40.05	22.0833	Yes	No	No		P	1992	2		None	No	Yes	Jackson traps with trimedlure				Adult	peach	apricots	fig	apples	pome fruit
112	N T	Papadopoulos	2001	Journal	Yes	Yes	Greece			Thessaloniki		Source	40	3		22	5		40.05	22.0833	Yes	No	No		P	1992	3		None	No	Yes	Jackson traps with trimedlure				Adult	peach	apricots	fig	apples	pome fruit
112	N T	Papadopoulos	2001	Journal	Yes	Yes	Greece			Thessaloniki		Source	40	3		22	5		40.05	22.0833	Yes	No	No		P	1992	4		None	No	Yes	Jackson traps with trimedlure				Adult	peach	apricots	fig	apples	pome fruit
112	N T	Papadopoulos	2001	Journal	Yes	Yes	Greece			Thessaloniki		Source	40	3		22	5		40.05	22.0833	Yes	No	No		P	1992	5		None	No	Yes	Jackson traps with trimedlure				Adult	peach	apricots	fig	apples	pome fruit
112	N T	Papadopoulos	2001	Journal	Yes	Yes	Greece			Thessaloniki		Source	40	3		22	5		40.05	22.0833	Yes	No	No		P	1992	6		None	No	Yes	Jackson traps with trimedlure				Adult	peach	apricots	fig	apples	pome fruit
112	N T	Papadopoulos	2001	Journal	Yes	Yes	Greece			Thessaloniki		Source	40	3		22	5		40.05	22.0833	Yes	No	No		P	1992	7		None	No	Yes	Jackson traps with trimedlure				Adult	peach	apricots	fig	apples	pome fruit
112	N T	Papadopoulos	2001	Journal	Yes	Yes	Greece			Thessaloniki		Source	40	3		22	5		40.05	22.0833	Yes	No	No		P	1992	8		None	No	Yes	Jackson traps with trimedlure				Adult	peach	apricots	fig	apples	pome fruit
112	N T	Papadopoulos	2001	Journal	Yes	Yes	Greece			Thessaloniki		Source	40	3		22	5		40.05	22.0833	Yes	No	No		P	1992	9	1	Low	Yes	Yes	Jackson traps with trimedlure				Adult	peach	apricots	fig	apples	pome fruit
112	N T	Papadopoulos	2001	Journal	Yes	Yes	Greece			Thessaloniki		Source	40	3		22	5		40.05	22.0833	Yes	No	No		P	1992	10		High	Yes	Yes	Jackson traps with trimedlure				Adult	peach	apricots	fig	apples	pome fruit
112	N T	Papadopoulos	2001	Journal	Yes	Yes	Greece			Thessaloniki		Source	40	3		22	5		40.05	22.0833	Yes	No	No		P	1992	11		Peak	Yes	Yes	Jackson traps with trimedlure				Adult	peach	apricots	fig	apples	pome fruit
112	N T	Papadopoulos	2001	Journal	Yes	Yes	Greece			Thessaloniki		Source	40	3		22	5		40.05	22.0833	Yes	No	No		P	1992	12		Marginal	Yes	Yes	Jackson traps with trimedlure				Adult	peach	apricots	fig	apples	pome fruit
112	N T	Papadopoulos	2001	Journal	Yes	Yes	Greece			Thessaloniki		Source	40	3		22	5		40.05	22.0833	Yes	No	No		P	1993	1		None	No	Yes	Jackson traps with trimedlure				Adult	peach	apricots	fig	apples	pome fruit
112	N T	Papadopoulos	2001	Journal	Yes	Yes	Greece			Thessaloniki		Source	40	3		22	5		40.05	22.0833	Yes	No	No		P	1993	2		None	No	Yes	Jackson traps with trimedlure				Adult	peach	apricots	fig	apples	pome fruit
112	N T	Papadopoulos	2001	Journal	Yes	Yes	Greece			Thessaloniki		Source	40	3		22	5		40.05	22.0833	Yes	No	No		P	1993	3		None	No	Yes	Jackson traps with trimedlure				Adult	peach	apricots	fig	apples	pome fruit
112	N T	Papadopoulos	2001	Journal	Yes	Yes	Greece			Thessaloniki		Source	40	3		22	5		40.05	22.0833	Yes	No	No		P	1993	4		None	No	Yes	Jackson traps with trimedlure				Adult	peach	apricots	fig	apples	pome fruit
112	N T	Papadopoulos	2001	Journal	Yes	Yes	Greece			Thessaloniki		Source	40	3		22	5		40.05	22.0833	Yes	No	No		P	1993	5		None	No	Yes	Jackson traps with trimedlure				Adult	peach	apricots	fig	apples	pome fruit
112	N T	Papadopoulos	2001	Journal	Yes	Yes	Greece			Thessaloniki		Source	40	3		22	5		40.05	22.0833	Yes	No	No		P	1993	6		None	No	Yes	Jackson traps with trimedlure				Adult	peach	apricots	fig	apples	pome fruit
112	N T	Papadopoulos	2001	Journal	Yes	Yes	Greece			Thessaloniki		Source	40	3		22	5		40.05	22.0833	Yes	No	No		P	1993	7		None	No	Yes	Jackson traps with trimedlure				Adult	peach	apricots	fig	apples	pome fruit
112	N T	Papadopoulos	2001	Journal	Yes	Yes	Greece			Thessaloniki		Source	40	3		22	5		40.05	22.0833	Yes	No	No		P	1993	8	25	Marginal	Yes	Yes	Jackson traps with trimedlure				Adult	peach	apricots	fig	apples	pome fruit
112	N T	Papadopoulos	2001	Journal	Yes	Yes	Greece			Thessaloniki		Source	40	3		22	5		40.05	22.0833	Yes	No	No		P	1993	9		Low	Yes	Yes	Jackson traps with trimedlure				Adult	peach	apricots	fig	apples	pome fruit
112	N T	Papadopoulos	2001	Journal	Yes	Yes	Greece			Thessaloniki		Source	40	3		22	5		40.05	22.0833	Yes	No	No		P	1993	10		Peak	Yes	Yes	Jackson traps with trimedlure				Adult	peach	apricots	fig	apples	pome fruit
112	N T	Papadopoulos	2001	Journal	Yes	Yes	Greece			Thessaloniki		Source	40	3		22	5		40.05	22.0833	Yes	No	No		P	1993	11		High	Yes	Yes	Jackson traps with trimedlure				Adult	peach	apricots	fig	apples	pome fruit
112	N T	Papadopoulos	2001	Journal	Yes	Yes	Greece			Thessaloniki		Source	40	3		22	5		40.05	22.0833	Yes	No	No		P	1993	12		Marginal	Yes	Yes	Jackson traps with trimedlure				Adult	peach	apricots	fig	apples	pome fruit
112	N T	Papadopoulos	2001	Journal	Yes	Yes	Greece			Thessaloniki		Source	40	3		22	5		40.05	22.0833	Yes	No	No		P	1994	1		None	No	Yes	Jackson traps with trimedlure				Adult	peach	apricots	fig	apples	pome fruit
112	N T	Papadopoulos	2001	Journal	Yes	Yes	Greece			Thessaloniki		Source	40	3		22	5		40.05	22.0833	Yes	No	No		P	1994	2		None	No	Yes	Jackson traps with trimedlure				Adult	peach	apricots	fig	apples	pome fruit
112	N T	Papadopoulos	2001	Journal	Yes	Yes	Greece			Thessaloniki		Source	40	3		22	5		40.05	22.0833	Yes	No	No		P	1994	3		None	No	Yes	Jackson traps with trimedlure				Adult	peach	apricots	fig	apples	pome fruit
112	N T	Papadopoulos	2001	Journal	Yes	Yes	Greece			Thessaloniki		Source	40	3		22	5		40.05	22.0833	Yes	No	No		P	1994	4		None	No	Yes	Jackson traps with trimedlure				Adult	peach	apricots	fig	apples	pome fruit
112	N T	Papadopoulos	2001	Journal	Yes	Yes	Greece			Thessaloniki		Source	40	3		22	5		40.05	22.0833	Yes	No	No		P	1994	5		None	No	Yes	Jackson traps with trimedlure				Adult	peach	apricots	fig	apples	pome fruit
112	N T	Papadopoulos	2001	Journal	Yes	Yes	Greece			Thessaloniki		Source	40	3		22	5		40.05	22.0833	Yes	No	No		P	1994	6	23	Marginal	Yes	Yes	Jackson traps with trimedlure				Adult	peach	apricots	fig	apples	pome fruit
112	N T	Papadopoulos	2001	Journal	Yes	Yes	Greece			Thessaloniki		Source	40	3		22	5		40.05	22.0833	Yes	No	No		P	1994	7		Marginal	Yes	Yes	Jackson traps with trimedlure				Adult	peach	apricots	fig	apples	pome fruit
112	N T	Papadopoulos	2001	Journal	Yes	Yes	Greece			Thessaloniki		Source	40	3		22	5		40.05	22.0833	Yes	No	No		P	1994	8		High	Yes	Yes	Jackson traps with trimedlure				Adult	peach	apricots	fig	apples	pome fruit
112	N T	Papadopoulos	2001	Journal	Yes	Yes	Greece			Thessaloniki		Source	40	3		22	5		40.05	22.0833	Yes	No	No		P	1994	9		High	Yes	Yes	Jackson traps with trimedlure				Adult	peach	apricots	fig	apples	pome fruit
112	N T	Papadopoulos	2001	Journal	Yes	Yes	Greece			Thessaloniki		Source	40	3		22	5		40.05	22.0833	Yes	No	No		P	1994	10		Peak	Yes	Yes	Jackson traps with trimedlure				Adult	peach	apricots	fig	apples	pome fruit
112	N T	Papadopoulos	2001	Journal	Yes	Yes	Greece			Thessaloniki		Source	40	3		22	5		40.05	22.0833	Yes	No	No		P	1994	11		Low	Yes	Yes	Jackson traps with trimedlure				Adult	peach	apricots	fig	apples	pome fruit
112	N T	Papadopoulos	2001	Journal	Yes	Yes	Greece			Thessaloniki		Source	40	3		22	5		40.05	22.0833	Yes	No	No		P	1994	12		Marginal	Yes	Yes	Jackson traps with trimedlure				Adult	peach	apricots	fig	apples	pome fruit
112	N T	Papadopoulos	2001	Journal	Yes	Yes	Greece			Thessaloniki		Source	40	3		22	5		40.05	22.0833	Yes	No	No		P	1995	1		None	No	Yes	Jackson traps with trimedlure				Adult	peach	apricots	fig	apples	pome fruit
112	N T	Papadopoulos	2001	Journal	Yes	Yes	Greece			Thessaloniki		Source	40	3		22	5		40.05	22.0833	Yes	No	No		P	1995	2		None	No	Yes	Jackson traps with trimedlure				Adult	peach	apricots	fig	apples	pome fruit
112	N T	Papadopoulos	2001	Journal	Yes	Yes	Greece			Thessaloniki		Source	40	3		22	5		40.05	22.0833	Yes	No	No		P	1995	3		None	No	Yes	Jackson traps with trimedlure				Adult	peach	apricots	fig	apples	pome fruit
112	N T	Papadopoulos	2001	Journal	Yes	Yes	Greece			Thessaloniki		Source	40	3		22	5		40.05	22.0833	Yes	No	No		P	1995	4		None	No	Yes	Jackson traps with trimedlure				Adult	peach	apricots	fig	apples	pome fruit
112	N T	Papadopoulos	2001	Journal	Yes	Yes	Greece			Thessaloniki		Source	40	3		22	5		40.05	22.0833	Yes	No	No		P	1995	5		None	No	Yes	Jackson traps with trimedlure				Adult	peach	apricots	fig	apples	pome fruit
112	N T	Papadopoulos	2001	Journal	Yes	Yes	Greece			Thessaloniki		Source	40	3		22	5		40.05	22.0833	Yes	No	No		P	1995	6		None	No	Yes	Jackson traps with trimedlure				Adult	peach	apricots	fig	apples	pome fruit
112	N T	Papadopoulos	2001	Journal	Yes	Yes	Greece			Thessaloniki		Source	40	3		22	5		40.05	22.0833	Yes	No	No		P	1995	7	6	Marginal	Yes	Yes	Jackson traps with trimedlure				Adult	peach	apricots	fig	apples	pome fruit
112	N T	Papadopoulos	2001	Journal	Yes	Yes	Greece			Thessaloniki		Source	40	3		22	5		40.05	22.0833	Yes	No	No		P	1995	8		Low	Yes	Yes	Jackson traps with trimedlure				Adult	peach	apricots	fig	apples	pome fruit
112	N T	Papadopoulos	2001	Journal	Yes	Yes	Greece			Thessaloniki		Source	40	3		22	5		40.05	22.0833	Yes	No	No		P	1995	9		High	Yes	Yes	Jackson traps with trimedlure				Adult	peach	apricots	fig	apples	pome fruit
112	N T	Papadopoulos	2001	Journal	Yes	Yes	Greece			Thessaloniki		Source	40	3		22	5		40.05	22.0833	Yes	No	No		P	1995	10		Peak	Yes	Yes	Jackson traps with trimedlure				Adult	peach	apricots	fig	apples	pome fruit
112	N T	Papadopoulos	2001	Journal	Yes	Yes	Greece			Thessaloniki		Source	40	3		22	5		40.05	22.0833	Yes	No	No		P	1995	11		High	Yes	Yes	Jackson traps with trimedlure				Adult	peach	apricots	fig	apples	pome fruit
112	N T	Papadopoulos	2001	Journal	Yes	Yes	Greece			Thessaloniki		Source	40	3		22	5		40.05	22.0833	Yes	No	No		P	1995	12		None	No	Yes	Jackson traps with trimedlure				Adult	peach	apricots	fig	apples	pome fruit
113	N T	Papadopoulos	2001	Journal	Yes	Yes	Greece			Thessaloniki		Source	40	3		22	5		40.05	22.0833	Yes	No	No		P	1998	4		None	No	Yes	McPhail traps with female targeted attractant		Jackson traps with male specific parapheromone trimedlure		Adult	apricots	peaches	apples
113	N T	Papadopoulos	2001	Journal	Yes	Yes	Greece			Thessaloniki		Source	40	3		22	5		40.05	22.0833	Yes	No	No		P	1998	5		None	No	Yes	McPhail traps with female targeted attractant		Jackson traps with male specific parapheromone trimedlure		Adult	apricots	peaches	apples
113	N T	Papadopoulos	2001	Journal	Yes	Yes	Greece			Thessaloniki		Source	40	3		22	5		40.05	22.0833	Yes	No	No		P	1998	6		Marginal	Yes	Yes	McPhail traps with female targeted attractant		Jackson traps with male specific parapheromone trimedlure		Adult	apricots	peaches	apples
113	N T	Papadopoulos	2001	Journal	Yes	Yes	Greece			Thessaloniki		Source	40	3		22	5		40.05	22.0833	Yes	No	No		P	1998	7		Low	Yes	Yes	McPhail traps with female targeted attractant		Jackson traps with male specific parapheromone trimedlure		Adult	apricots	peaches	apples
113	N T	Papadopoulos	2001	Journal	Yes	Yes	Greece			Thessaloniki		Source	40	3		22	5		40.05	22.0833	Yes	No	No		P	1998	8		Low	Yes	Yes	McPhail traps with female targeted attractant		Jackson traps with male specific parapheromone trimedlure		Adult	apricots	peaches	apples
113	N T	Papadopoulos	2001	Journal	Yes	Yes	Greece			Thessaloniki		Source	40	3		22	5		40.05	22.0833	Yes	No	No		P	1998	9		High	Yes	Yes	McPhail traps with female targeted attractant		Jackson traps with male specific parapheromone trimedlure		Adult	apricots	peaches	apples
113	N T	Papadopoulos	2001	Journal	Yes	Yes	Greece			Thessaloniki		Source	40	3		22	5		40.05	22.0833	Yes	No	No		P	1998	10		Peak	Yes	Yes	McPhail traps with female targeted attractant		Jackson traps with male specific parapheromone trimedlure		Adult	apricots	peaches	apples
113	N T	Papadopoulos	2001	Journal	Yes	Yes	Greece			Thessaloniki		Source	40	3		22	5		40.05	22.0833	Yes	No	No		P	1998	11		High	Yes	Yes	McPhail traps with female targeted attractant		Jackson traps with male specific parapheromone trimedlure		Adult	apricots	peaches	apples
116	S L	Peck	2000	Conference	Yes	Yes	United States	Hawaii	Kauai	Kalaheo Gulch		GoogleEarth	21	53	40	-159	32	29	21.8944	-159.541	No	Yes	No	treatment applied and tested	P	1998	9		Peak	Yes	Yes	Synthetic food baits				Adult	coffee
116	S L	Peck	2000	Conference	Yes	Yes	United States	Hawaii	Kauai	Kalaheo Gulch		GoogleEarth	21	53	40	-159	32	29	21.8944	-159.541	No	Yes	No	treatment applied and tested	P	1998	10		High	Yes	Yes	Synthetic food baits				Adult	coffee
116	S L	Peck	2000	Conference	Yes	Yes	United States	Hawaii	Kauai	Kalaheo Gulch		GoogleEarth	21	53	40	-159	32	29	21.8944	-159.541	No	Yes	No	treatment applied and tested	P	1998	11		Low	Yes	Yes	Synthetic food baits				Adult	coffee
116	S L	Peck	2000	Conference	Yes	Yes	United States	Hawaii	Kauai	Kalaheo Gulch		GoogleEarth	21	53	40	-159	32	29	21.8944	-159.541	No	Yes	No	treatment applied and tested	P	1998	12		High	Yes	Yes	Synthetic food baits				Adult	coffee
116	S L	Peck	2000	Conference	Yes	Yes	United States	Hawaii	Kauai	Kalaheo Gulch		GoogleEarth	21	53	40	-159	32	29	21.8944	-159.541	No	Yes	No	treatment applied and tested	P	1999	1		Low	Yes	Yes	Synthetic food baits				Adult	coffee
128	J P	Ros	2002	Conference	Yes	Yes	Spain	Minorca		Calam Porter		GoogleEarth	39	52	39	4	8	6	39.8775	4.135	No	Yes	No		P	2001	1		Low	Yes	Yes	Tephri traps baited with synthetic attractant
128	J P	Ros	2002	Conference	Yes	Yes	Spain	Minorca		Calam Porter		GoogleEarth	39	52	39	4	8	6	39.8775	4.135	No	Yes	No		P	2001	2		Marginal	Yes	Yes	Tephri traps baited with synthetic attractant
128	J P	Ros	2002	Conference	Yes	Yes	Spain	Minorca		Calam Porter		GoogleEarth	39	52	39	4	8	6	39.8775	4.135	No	Yes	No		P	2001	3		None	No	Yes	Tephri traps baited with synthetic attractant
128	J P	Ros	2002	Conference	Yes	Yes	Spain	Minorca		Calam Porter		GoogleEarth	39	52	39	4	8	6	39.8775	4.135	No	Yes	No		P	2001	4		None	No	Yes	Tephri traps baited with synthetic attractant
128	J P	Ros	2002	Conference	Yes	Yes	Spain	Minorca		Calam Porter		GoogleEarth	39	52	39	4	8	6	39.8775	4.135	No	Yes	No		P	2001	5		None	No	Yes	Tephri traps baited with synthetic attractant
128	J P	Ros	2002	Conference	Yes	Yes	Spain	Minorca		Calam Porter		GoogleEarth	39	52	39	4	8	6	39.8775	4.135	No	Yes	No		P	2001	6		Marginal	Yes	Yes	Tephri traps baited with synthetic attractant
128	J P	Ros	2002	Conference	Yes	Yes	Spain	Minorca		Calam Porter		GoogleEarth	39	52	39	4	8	6	39.8775	4.135	No	Yes	No		P	2001	7		Low	Yes	Yes	Tephri traps baited with synthetic attractant
128	J P	Ros	2002	Conference	Yes	Yes	Spain	Minorca		Calam Porter		GoogleEarth	39	52	39	4	8	6	39.8775	4.135	No	Yes	No		P	2001	8		Low	Yes	Yes	Tephri traps baited with synthetic attractant
128	J P	Ros	2002	Conference	Yes	Yes	Spain	Minorca		Calam Porter		GoogleEarth	39	52	39	4	8	6	39.8775	4.135	No	Yes	No		P	2001	9		Peak	Yes	Yes	Tephri traps baited with synthetic attractant
128	J P	Ros	2002	Conference	Yes	Yes	Spain	Minorca		Calam Porter		GoogleEarth	39	52	39	4	8	6	39.8775	4.135	No	Yes	No		P	2001	10		Peak	Yes	Yes	Tephri traps baited with synthetic attractant
128	J P	Ros	2002	Conference	Yes	Yes	Spain	Minorca		Calam Porter		GoogleEarth	39	52	39	4	8	6	39.8775	4.135	No	Yes	No		P	2001	11		High	Yes	Yes	Tephri traps baited with synthetic attractant
128	J P	Ros	2002	Conference	Yes	Yes	Spain	Minorca		Calam Porter		GoogleEarth	39	52	39	4	8	6	39.8775	4.135	No	Yes	No		P	2001	12		Low	Yes	Yes	Tephri traps baited with synthetic attractant
128	J P	Ros	2002	Conference	Yes	Yes	Spain	Minorca		Tremol		GoogleEarth	39	57	38	4	4	13	39.9606	4.07028	No	Yes	No		P	2001	1		None	Yes	Yes	Tephri traps baited with synthetic attractant
128	J P	Ros	2002	Conference	Yes	Yes	Spain	Minorca		Tremol		GoogleEarth	39	57	38	4	4	13	39.9606	4.07028	No	Yes	No		P	2001	2		None	Yes	Yes	Tephri traps baited with synthetic attractant
128	J P	Ros	2002	Conference	Yes	Yes	Spain	Minorca		Tremol		GoogleEarth	39	57	38	4	4	13	39.9606	4.07028	No	Yes	No		P	2001	3		None	No	Yes	Tephri traps baited with synthetic attractant
128	J P	Ros	2002	Conference	Yes	Yes	Spain	Minorca		Tremol		GoogleEarth	39	57	38	4	4	13	39.9606	4.07028	No	Yes	No		P	2001	4		None	No	Yes	Tephri traps baited with synthetic attractant
128	J P	Ros	2002	Conference	Yes	Yes	Spain	Minorca		Tremol		GoogleEarth	39	57	38	4	4	13	39.9606	4.07028	No	Yes	No		P	2001	5		None	No	Yes	Tephri traps baited with synthetic attractant
128	J P	Ros	2002	Conference	Yes	Yes	Spain	Minorca		Tremol		GoogleEarth	39	57	38	4	4	13	39.9606	4.07028	No	Yes	No		P	2001	6		None	Yes	Yes	Tephri traps baited with synthetic attractant
128	J P	Ros	2002	Conference	Yes	Yes	Spain	Minorca		Tremol		GoogleEarth	39	57	38	4	4	13	39.9606	4.07028	No	Yes	No		P	2001	7		None	Yes	Yes	Tephri traps baited with synthetic attractant
128	J P	Ros	2002	Conference	Yes	Yes	Spain	Minorca		Tremol		GoogleEarth	39	57	38	4	4	13	39.9606	4.07028	No	Yes	No		P	2001	8		Low	Yes	Yes	Tephri traps baited with synthetic attractant
128	J P	Ros	2002	Conference	Yes	Yes	Spain	Minorca		Tremol		GoogleEarth	39	57	38	4	4	13	39.9606	4.07028	No	Yes	No		P	2001	9		High	Yes	Yes	Tephri traps baited with synthetic attractant
128	J P	Ros	2002	Conference	Yes	Yes	Spain	Minorca		Tremol		GoogleEarth	39	57	38	4	4	13	39.9606	4.07028	No	Yes	No		P	2001	10		Peak	Yes	Yes	Tephri traps baited with synthetic attractant
128	J P	Ros	2002	Conference	Yes	Yes	Spain	Minorca		Tremol		GoogleEarth	39	57	38	4	4	13	39.9606	4.07028	No	Yes	No		P	2001	11		High	Yes	Yes	Tephri traps baited with synthetic attractant
128	J P	Ros	2002	Conference	Yes	Yes	Spain	Minorca		Tremol		GoogleEarth	39	57	38	4	4	13	39.9606	4.07028	No	Yes	No		P	2001	12		Marginal	Yes	Yes	Tephri traps baited with synthetic attractant
135	J G	Silva	2003	Journal	Yes	Yes	USA	Florida		Ocala		GoogleEarth	29	11	13	-82	8	24	29.1869	-82.14	No	No	Yes		T	1997					Yes
135	J G	Silva	2003	Journal	Yes	Yes	USA	Florida		Ocala		GoogleEarth	29	11	13	-82	8	24	29.1869	-82.14	No	No	Yes		T	1998					Yes
135	J G	Silva	2003	Journal	Yes	Yes	USA	Florida		Sarasota		GoogleEarth	27	20	11	-82	31	50	27.3364	-82.5306	No	No	Yes		T	1997					Yes
135	J G	Silva	2003	Journal	Yes	Yes	USA	Florida		Sarasota		GoogleEarth	27	20	11	-82	31	50	27.3364	-82.5306	No	No	Yes		T	1998					Yes
136	S A S	Souza	2005	Journal	Yes	Yes	Brazil	Rio de Janeiro	Valenca	Barao de Juparana	Embrapa Gado de Leite	Source	-22	11		-43	41		-22.1833	-43.6833	Yes	No	No		P	2004					Yes						coffee arabic
137	Z A	Souza-Filho	2007	Journal	Yes	Yes	Brazil		Bahia	Una		Source	-15	17	36	-39	4	31	-15.2933	-39.0753	Yes	No	No		A	2004	2				Yes						guava
137	Z A	Souza-Filho	2007	Journal	Yes	Yes	Brazil		Bahia	Una		Source	-15	17	36	-39	4	31	-15.2933	-39.0753	Yes	No	No		A	2004	3				Yes						guava
137	Z A	Souza-Filho	2007	Journal	Yes	Yes	Brazil		Bahia	Una		Source	-15	17	36	-39	4	31	-15.2933	-39.0753	Yes	No	No		A	2004	4				Yes						guava
137	Z A	Souza-Filho	2007	Journal	Yes	Yes	Brazil		Bahia	Una		Source	-15	17	36	-39	4	31	-15.2933	-39.0753	Yes	No	No		A	2004	5				Yes						guava
137	Z A	Souza-Filho	2007	Journal	Yes	Yes	Brazil		Bahia	Una		Source	-15	17	36	-39	4	31	-15.2933	-39.0753	Yes	No	No		A	2004	6				Yes						guava
137	Z A	Souza-Filho	2007	Journal	Yes	Yes	Brazil		Bahia	Una		Source	-15	17	36	-39	4	31	-15.2933	-39.0753	Yes	No	No		A	2004	7				Yes						guava
137	Z A	Souza-Filho	2007	Journal	Yes	Yes	Brazil		Bahia	Una		Source	-15	17	36	-39	4	31	-15.2933	-39.0753	Yes	No	No		A	2004	8				Yes						guava
137	Z A	Souza-Filho	2007	Journal	Yes	Yes	Brazil		Bahia	Una		Source	-15	17	36	-39	4	31	-15.2933	-39.0753	Yes	No	No		A	2004	9				Yes						guava
137	Z A	Souza-Filho	2007	Journal	Yes	Yes	Brazil		Bahia	Una		Source	-15	17	36	-39	4	31	-15.2933	-39.0753	Yes	No	No		A	2004	10				Yes						guava
137	Z A	Souza-Filho	2007	Journal	Yes	Yes	Brazil		Bahia	Una		Source	-15	17	36	-39	4	31	-15.2933	-39.0753	Yes	No	No		A	2004	11				Yes						guava
137	Z A	Souza-Filho	2007	Journal	Yes	Yes	Brazil		Bahia	Una		Source	-15	17	36	-39	4	31	-15.2933	-39.0753	Yes	No	No		A	2004	12				Yes						guava
137	Z A	Souza-Filho	2007	Journal	Yes	Yes	Brazil		Bahia	Una		Source	-15	17	36	-39	4	31	-15.2933	-39.0753	Yes	No	No		A	2005	1				Yes						guava
138	Z A	Souza-Filho	2009	Journal	Yes	Yes	Brazil		Sao Paulo	Monte Alegre do Sul		Source	-22	40	50	-46	40	45	-22.6806	-46.6792	Yes	No	No		P	2002	1		None	No	Yes	McPhail traps				Adult	guava	loquat	peach
138	Z A	Souza-Filho	2009	Journal	Yes	Yes	Brazil		Sao Paulo	Monte Alegre do Sul		Source	-22	40	50	-46	40	45	-22.6806	-46.6792	Yes	No	No		P	2002	2		None	No	Yes	McPhail traps				Adult	guava	loquat	peach
138	Z A	Souza-Filho	2009	Journal	Yes	Yes	Brazil		Sao Paulo	Monte Alegre do Sul		Source	-22	40	50	-46	40	45	-22.6806	-46.6792	Yes	No	No		P	2002	3		None	No	Yes	McPhail traps				Adult	guava	loquat	peach
138	Z A	Souza-Filho	2009	Journal	Yes	Yes	Brazil		Sao Paulo	Monte Alegre do Sul		Source	-22	40	50	-46	40	45	-22.6806	-46.6792	Yes	No	No		P	2002	4		None	No	Yes	McPhail traps				Adult	guava	loquat	peach
138	Z A	Souza-Filho	2009	Journal	Yes	Yes	Brazil		Sao Paulo	Monte Alegre do Sul		Source	-22	40	50	-46	40	45	-22.6806	-46.6792	Yes	No	No		P	2002	5		None	No	Yes	McPhail traps				Adult	guava	loquat	peach
138	Z A	Souza-Filho	2009	Journal	Yes	Yes	Brazil		Sao Paulo	Monte Alegre do Sul		Source	-22	40	50	-46	40	45	-22.6806	-46.6792	Yes	No	No		P	2002	6		Marginal	Yes	Yes	McPhail traps				Adult	guava	loquat	peach
138	Z A	Souza-Filho	2009	Journal	Yes	Yes	Brazil		Sao Paulo	Monte Alegre do Sul		Source	-22	40	50	-46	40	45	-22.6806	-46.6792	Yes	No	No		P	2002	7		Marginal	Yes	Yes	McPhail traps				Adult	guava	loquat	peach
138	Z A	Souza-Filho	2009	Journal	Yes	Yes	Brazil		Sao Paulo	Monte Alegre do Sul		Source	-22	40	50	-46	40	45	-22.6806	-46.6792	Yes	No	No		P	2002	8		High	Yes	Yes	McPhail traps				Adult	guava	loquat	peach
138	Z A	Souza-Filho	2009	Journal	Yes	Yes	Brazil		Sao Paulo	Monte Alegre do Sul		Source	-22	40	50	-46	40	45	-22.6806	-46.6792	Yes	No	No		P	2002	9		Peak	Yes	Yes	McPhail traps				Adult	guava	loquat	peach
138	Z A	Souza-Filho	2009	Journal	Yes	Yes	Brazil		Sao Paulo	Monte Alegre do Sul		Source	-22	40	50	-46	40	45	-22.6806	-46.6792	Yes	No	No		P	2002	10		Peak	Yes	Yes	McPhail traps				Adult	guava	loquat	peach
138	Z A	Souza-Filho	2009	Journal	Yes	Yes	Brazil		Sao Paulo	Monte Alegre do Sul		Source	-22	40	50	-46	40	45	-22.6806	-46.6792	Yes	No	No		P	2002	11		High	Yes	Yes	McPhail traps				Adult	guava	loquat	peach
138	Z A	Souza-Filho	2009	Journal	Yes	Yes	Brazil		Sao Paulo	Monte Alegre do Sul		Source	-22	40	50	-46	40	45	-22.6806	-46.6792	Yes	No	No		P	2002	12		Marginal	Yes	Yes	McPhail traps				Adult	guava	loquat	peach
138	Z A	Souza-Filho	2009	Journal	Yes	Yes	Brazil		Sao Paulo	Monte Alegre do Sul		Source	-22	40	50	-46	40	45	-22.6806	-46.6792	Yes	No	No		P	2003	1		None	No	Yes	McPhail traps				Adult	guava	loquat	peach
138	Z A	Souza-Filho	2009	Journal	Yes	Yes	Brazil		Sao Paulo	Monte Alegre do Sul		Source	-22	40	50	-46	40	45	-22.6806	-46.6792	Yes	No	No		P	2003	2		None	No	Yes	McPhail traps				Adult	guava	loquat	peach
138	Z A	Souza-Filho	2009	Journal	Yes	Yes	Brazil		Sao Paulo	Monte Alegre do Sul		Source	-22	40	50	-46	40	45	-22.6806	-46.6792	Yes	No	No		P	2003	3		None	No	Yes	McPhail traps				Adult	guava	loquat	peach
138	Z A	Souza-Filho	2009	Journal	Yes	Yes	Brazil		Sao Paulo	Monte Alegre do Sul		Source	-22	40	50	-46	40	45	-22.6806	-46.6792	Yes	No	No		P	2003	4		None	No	Yes	McPhail traps				Adult	guava	loquat	peach
138	Z A	Souza-Filho	2009	Journal	Yes	Yes	Brazil		Sao Paulo	Monte Alegre do Sul		Source	-22	40	50	-46	40	45	-22.6806	-46.6792	Yes	No	No		P	2003	5		None	No	Yes	McPhail traps				Adult	guava	loquat	peach
138	Z A	Souza-Filho	2009	Journal	Yes	Yes	Brazil		Sao Paulo	Monte Alegre do Sul		Source	-22	40	50	-46	40	45	-22.6806	-46.6792	Yes	No	No		P	2003	6		Marginal	Yes	Yes	McPhail traps				Adult	guava	loquat	peach
138	Z A	Souza-Filho	2009	Journal	Yes	Yes	Brazil		Sao Paulo	Monte Alegre do Sul		Source	-22	40	50	-46	40	45	-22.6806	-46.6792	Yes	No	No		P	2003	7		Low	Yes	Yes	McPhail traps				Adult	guava	loquat	peach
138	Z A	Souza-Filho	2009	Journal	Yes	Yes	Brazil		Sao Paulo	Monte Alegre do Sul		Source	-22	40	50	-46	40	45	-22.6806	-46.6792	Yes	No	No		P	2003	8		Low	Yes	Yes	McPhail traps				Adult	guava	loquat	peach
138	Z A	Souza-Filho	2009	Journal	Yes	Yes	Brazil		Sao Paulo	Monte Alegre do Sul		Source	-22	40	50	-46	40	45	-22.6806	-46.6792	Yes	No	No		P	2003	9		Peak	Yes	Yes	McPhail traps				Adult	guava	loquat	peach
138	Z A	Souza-Filho	2009	Journal	Yes	Yes	Brazil		Sao Paulo	Monte Alegre do Sul		Source	-22	40	50	-46	40	45	-22.6806	-46.6792	Yes	No	No		P	2003	10		Peak	Yes	Yes	McPhail traps				Adult	guava	loquat	peach
138	Z A	Souza-Filho	2009	Journal	Yes	Yes	Brazil		Sao Paulo	Monte Alegre do Sul		Source	-22	40	50	-46	40	45	-22.6806	-46.6792	Yes	No	No		P	2003	11		Low	Yes	Yes	McPhail traps				Adult	guava	loquat	peach
138	Z A	Souza-Filho	2009	Journal	Yes	Yes	Brazil		Sao Paulo	Monte Alegre do Sul		Source	-22	40	50	-46	40	45	-22.6806	-46.6792	Yes	No	No		P	2003	12		Marginal	Yes	Yes	McPhail traps				Adult	guava	loquat	peach
138	Z A	Souza-Filho	2009	Journal	Yes	Yes	Brazil		Sao Paulo	Monte Alegre do Sul		Source	-22	40	50	-46	40	45	-22.6806	-46.6792	Yes	No	No		P	2004	1		None	No	Yes	McPhail traps				Adult	guava	loquat	peach
140	D M	Suckling	2008	Journal	Yes	Yes	United States	Hawaii		Koke'e State Park		Source	22	4		-159	60		22.0667	-160	Yes	No	No		P	2005	9		Low	Yes	Yes	Lynfield traps baited with trimedlure				Adult	koa tree	lehua tree	strawberry guava
140	D M	Suckling	2008	Journal	Yes	Yes	United States	Hawaii		Koke'e State Park		Source	22	4		-159	60		22.0667	-160	Yes	No	No		P	2005	10		High	Yes	Yes	Lynfield traps baited with trimedlure				Adult	koa tree	lehua tree	strawberry guava
140	D M	Suckling	2008	Journal	Yes	Yes	United States	Hawaii		Koke'e State Park		Source	22	4		-159	60		22.0667	-160	Yes	No	No		P	2005	11		Peak	Yes	Yes	Lynfield traps baited with trimedlure				Adult	koa tree	lehua tree	strawberry guava
140	D M	Suckling	2008	Journal	Yes	Yes	United States	Hawaii		Koke'e State Park		Source	22	4		-159	60		22.0667	-160	Yes	No	No		P	2005	12		Low	Yes	Yes	Lynfield traps baited with trimedlure				Adult	koa tree	lehua tree	strawberry guava
140	D M	Suckling	2008	Journal	Yes	Yes	United States	Hawaii		Koke'e State Park		Source	22	4		-159	60		22.0667	-160	Yes	No	No		P	2006	1		High	Yes	Yes	Lynfield traps baited with trimedlure				Adult	koa tree	lehua tree	strawberry guava
144	M	Toth	2009	Journal	Yes	Yes	Italy		Rome	Ciampino		GoogleEarth	41	48	6	12	37	4	41.8017	12.6178	No	Yes	No		P	2006	8		Low	Yes	Yes	traps with male targeted lure				Adult
144	M	Toth	2009	Journal	Yes	Yes	Italy		Rome	Ciampino		GoogleEarth	41	48	6	12	37	4	41.8017	12.6178	No	Yes	No		P	2006	9		Peak	Yes	Yes	traps with male targeted lure				Adult
144	M	Toth	2009	Journal	Yes	Yes	Italy		Rome	Ciampino		GoogleEarth	41	48	6	12	37	4	41.8017	12.6178	No	Yes	No		P	2006	10		High	Yes	Yes	traps with male targeted lure				Adult
144	M	Toth	2009	Journal	Yes	Yes	Italy		Rome	Ciampino		GoogleEarth	41	48	6	12	37	4	41.8017	12.6178	No	Yes	No		P	2006	11		Low	Yes	Yes	traps with male targeted lure				Adult
146	M A	Uchoa-Fernandez	2002	Journal	Yes	Yes	Brazil	Mato Grosso do Sul		Aquidauana		Source	-20	39		-55	19	50	-20.65	-55.3306	No	Yes	No		P	1993					Yes
146	M A	Uchoa-Fernandez	2002	Journal	Yes	Yes	Brazil	Mato Grosso do Sul		Coxim		Source	-18	30	12	-54	45		-18.5033	-54.75	No	Yes	No		P	1993					Yes
146	M A	Uchoa-Fernandez	2002	Journal	Yes	Yes	Brazil	Mato Grosso do Sul		Terenos		Source	-20	26	12	-54	4	54	-20.4367	-54.0817	No	Yes	No		P	1993					Yes
146	M A	Uchoa-Fernandez	2002	Journal	Yes	Yes	Brazil	Mato Grosso do Sul		Anastacio		Source	-20	31	36	-55	50	12	-20.5267	-55.8367	No	Yes	No		P	1993					Yes
146	M A	Uchoa-Fernandez	2002	Journal	Yes	Yes	Brazil	Mato Grosso do Sul		Dois Irmaos do Buriti		Source	-20	39		-55	19	50	-20.6347	-55.3306	No	Yes	No		P	1993					Yes
146	M A	Uchoa-Fernandez	2002	Journal	Yes	Yes	Brazil	Mato Grosso do Sul		Nioaque		Source	-21	20		-55	49	45	-21.3333	-55.8292	No	Yes	No		P	1993					Yes
146	M A	Uchoa-Fernandez	2002	Journal	Yes	Yes	Brazil	Mato Grosso do Sul		Rochedo		Source	-19	57	30	-54	53	10	-19.9583	-54.8861	No	Yes	No		P	1993					Yes
146	M A	Uchoa-Fernandez	2002	Journal	Yes	Yes	Brazil	Mato Grosso do Sul		Aquidauana		Source	-20	39		-55	19	50	-20.65	-55.3306	No	Yes	No		P	1994					Yes
146	M A	Uchoa-Fernandez	2002	Journal	Yes	Yes	Brazil	Mato Grosso do Sul		Coxim		Source	-18	30	12	-54	45		-18.5033	-54.75	No	Yes	No		P	1994					Yes
146	M A	Uchoa-Fernandez	2002	Journal	Yes	Yes	Brazil	Mato Grosso do Sul		Terenos		Source	-20	26	12	-54	4	54	-20.4367	-54.0817	No	Yes	No		P	1994					Yes
146	M A	Uchoa-Fernandez	2002	Journal	Yes	Yes	Brazil	Mato Grosso do Sul		Anastacio		Source	-20	31	36	-55	50	12	-20.5267	-55.8367	No	Yes	No		P	1994					Yes
146	M A	Uchoa-Fernandez	2002	Journal	Yes	Yes	Brazil	Mato Grosso do Sul		Dois Irmaos do Buriti		Source	-20	39		-55	19	50	-20.6347	-55.3306	No	Yes	No		P	1994					Yes
146	M A	Uchoa-Fernandez	2002	Journal	Yes	Yes	Brazil	Mato Grosso do Sul		Nioaque		Source	-21	20		-55	49	45	-21.3333	-55.8292	No	Yes	No		P	1994					Yes
146	M A	Uchoa-Fernandez	2002	Journal	Yes	Yes	Brazil	Mato Grosso do Sul		Rochedo		Source	-19	57	30	-54	53	10	-19.9583	-54.8861	No	Yes	No		P	1994					Yes
146	M A	Uchoa-Fernandez	2002	Journal	Yes	Yes	Brazil	Mato Grosso do Sul		Aquidauana		Source	-20	39		-55	19	50	-20.65	-55.3306	No	Yes	No		P	1995					Yes
146	M A	Uchoa-Fernandez	2002	Journal	Yes	Yes	Brazil	Mato Grosso do Sul		Coxim		Source	-18	30	12	-54	45		-18.5033	-54.75	No	Yes	No		P	1995					Yes
146	M A	Uchoa-Fernandez	2002	Journal	Yes	Yes	Brazil	Mato Grosso do Sul		Terenos		Source	-20	26	12	-54	4	54	-20.4367	-54.0817	No	Yes	No		P	1995					Yes
146	M A	Uchoa-Fernandez	2002	Journal	Yes	Yes	Brazil	Mato Grosso do Sul		Anastacio		Source	-20	31	36	-55	50	12	-20.5267	-55.8367	No	Yes	No		P	1995					Yes
146	M A	Uchoa-Fernandez	2002	Journal	Yes	Yes	Brazil	Mato Grosso do Sul		Dois Irmaos do Buriti		Source	-20	39		-55	19	50	-20.6347	-55.3306	No	Yes	No		P	1995					Yes
146	M A	Uchoa-Fernandez	2002	Journal	Yes	Yes	Brazil	Mato Grosso do Sul		Nioaque		Source	-21	20		-55	49	45	-21.3333	-55.8292	No	Yes	No		P	1995					Yes
146	M A	Uchoa-Fernandez	2002	Journal	Yes	Yes	Brazil	Mato Grosso do Sul		Rochedo		Source	-19	57	30	-54	53	10	-19.9583	-54.8861	No	Yes	No		P	1995					Yes
146	M A	Uchoa-Fernandez	2002	Journal	Yes	Yes	Brazil	Mato Grosso do Sul		Aquidauana		Source	-20	39		-55	19	50	-20.65	-55.3306	No	Yes	No		P	1996					Yes
146	M A	Uchoa-Fernandez	2002	Journal	Yes	Yes	Brazil	Mato Grosso do Sul		Coxim		Source	-18	30	12	-54	45		-18.5033	-54.75	No	Yes	No		P	1996					Yes
146	M A	Uchoa-Fernandez	2002	Journal	Yes	Yes	Brazil	Mato Grosso do Sul		Terenos		Source	-20	26	12	-54	4	54	-20.4367	-54.0817	No	Yes	No		P	1996					Yes
146	M A	Uchoa-Fernandez	2002	Journal	Yes	Yes	Brazil	Mato Grosso do Sul		Anastacio		Source	-20	31	36	-55	50	12	-20.5267	-55.8367	No	Yes	No		P	1996					Yes
146	M A	Uchoa-Fernandez	2002	Journal	Yes	Yes	Brazil	Mato Grosso do Sul		Dois Irmaos do Buriti		Source	-20	39		-55	19	50	-20.6347	-55.3306	No	Yes	No		P	1996					Yes
146	M A	Uchoa-Fernandez	2002	Journal	Yes	Yes	Brazil	Mato Grosso do Sul		Nioaque		Source	-21	20		-55	49	45	-21.3333	-55.8292	No	Yes	No		P	1996					Yes
146	M A	Uchoa-Fernandez	2002	Journal	Yes	Yes	Brazil	Mato Grosso do Sul		Rochedo		Source	-19	57	30	-54	53	10	-19.9583	-54.8861	No	Yes	No		P	1996					Yes
146	M A	Uchoa-Fernandez	2002	Journal	Yes	Yes	Brazil	Mato Grosso do Sul		Aquidauana		Source	-20	39		-55	19	50	-20.65	-55.3306	No	Yes	No		P	1997					Yes
146	M A	Uchoa-Fernandez	2002	Journal	Yes	Yes	Brazil	Mato Grosso do Sul		Coxim		Source	-18	30	12	-54	45		-18.5033	-54.75	No	Yes	No		P	1997					Yes
146	M A	Uchoa-Fernandez	2002	Journal	Yes	Yes	Brazil	Mato Grosso do Sul		Terenos		Source	-20	26	12	-54	4	54	-20.4367	-54.0817	No	Yes	No		P	1997					Yes
146	M A	Uchoa-Fernandez	2002	Journal	Yes	Yes	Brazil	Mato Grosso do Sul		Anastacio		Source	-20	31	36	-55	50	12	-20.5267	-55.8367	No	Yes	No		P	1997					Yes
146	M A	Uchoa-Fernandez	2002	Journal	Yes	Yes	Brazil	Mato Grosso do Sul		Dois Irmaos do Buriti		Source	-20	39		-55	19	50	-20.6347	-55.3306	No	Yes	No		P	1997					Yes
146	M A	Uchoa-Fernandez	2002	Journal	Yes	Yes	Brazil	Mato Grosso do Sul		Nioaque		Source	-21	20		-55	49	45	-21.3333	-55.8292	No	Yes	No		P	1997					Yes
146	M A	Uchoa-Fernandez	2002	Journal	Yes	Yes	Brazil	Mato Grosso do Sul		Rochedo		Source	-19	57	30	-54	53	10	-19.9583	-54.8861	No	Yes	No		P	1997					Yes
145	M A	Uchoa-Fernandez	2003	Journal	Yes	Yes	Brazil			Chacara Estrela									#DIV/0!	#DIV/0!	No	Yes	No		P	1998	12				Yes
145	M A	Uchoa-Fernandez	2003	Journal	Yes	Yes	Brazil			Aquidauana		Source	-20	28	3	-55	47	1	-20.4675	-55.7836	Yes	No	No		P	1998	12				Yes
145	M A	Uchoa-Fernandez	2003	Journal	Yes	Yes	Brazil			Aquidauana	Aquidauana	Source	-20	28	3	-55	47	1	-20.4675	-55.7836	Yes	No	No		P	1999	1				Yes
145	M A	Uchoa-Fernandez	2003	Journal	Yes	Yes	Brazil			Aquidauana	Aquidauana	Source	-20	28	3	-55	47	1	-20.4675	-55.7836	Yes	No	No		P	1999	3				Yes
145	M A	Uchoa-Fernandez	2003	Journal	Yes	Yes	Brazil			Aquidauana	Aquidauana	Source	-20	28	3	-55	47	1	-20.4675	-55.7836	Yes	No	No		P	1999	6				Yes
145	M A	Uchoa-Fernandez	2003	Journal	Yes	Yes	Brazil			Aquidauana	Aquidauana	Source	-20	28	3	-55	47	1	-20.4675	-55.7836	Yes	No	No		P	1999	8				Yes
145	M A	Uchoa-Fernandez	2003	Journal	Yes	Yes	Brazil			Aquidauana		Source	-20	28	3	-55	47	1	-20.4675	-55.7836	Yes	No	No		P	1999	12				Yes
145	M A	Uchoa-Fernandez	2003	Journal	Yes	Yes	Brazil			Aquidauana	Aquidauana	Source	-20	28	3	-55	47	1	-20.4675	-55.7836	Yes	No	No		P	2000	2				#REF!
145	M A	Uchoa-Fernandez	2003	Journal	Yes	Yes	Brazil			Aquidauana	Aquidauana	Source	-20	28	3	-55	47	1	-20.4675	-55.7836	Yes	No	No		P	2000	6				Yes
145	M A	Uchoa-Fernandez	2003	Journal	Yes	Yes	Brazil			Piraputanga		GoogleEarth	-20	26		-55	32		-20.4333	-55.5333	No	Yes	No		P	1999	3				Yes
145	M A	Uchoa-Fernandez	2003	Journal	Yes	Yes	Brazil			Piraputanga		GoogleEarth	-20	26		-55	32		-20.4333	-55.5333	No	Yes	No		P	2000	2				Yes
145	M A	Uchoa-Fernandez	2003	Journal	Yes	Yes	Brazil			Piraputanga		GoogleEarth	-20	26		-55	32		-20.4333	-55.5333	No	Yes	No		P	2000	6				Yes
145	M A	Uchoa-Fernandez	2003	Journal	Yes	Yes	Brazil			Pousada Aguape									#DIV/0!	#DIV/0!	No	Yes	No		P	1999	3				Yes
145	M A	Uchoa-Fernandez	2003	Journal	Yes	Yes	Brazil			Pousada Aguape									#DIV/0!	#DIV/0!	No	Yes	No		P	2000	2				Yes
145	M A	Uchoa-Fernandez	2003	Journal	Yes	Yes	Brazil			Pousada Aguape									#DIV/0!	#DIV/0!	No	Yes	No		P	2000	6				Yes
145	M A	Uchoa-Fernandez	2003	Journal	Yes	Yes	Brazil			Fazenda Sao Jose		GoogleEarth	-20	26	25	-54	52		-20.4403	-54.8667	No	Yes	No		P	1999	12				Yes
145	M A	Uchoa-Fernandez	2003	Journal	Yes	Yes	Brazil			Aquidauana		Source	-20	28	3	-55	47	1	-20.4675	-55.7836	Yes	No	No		P	1998	2				Yes
145	M A	Uchoa-Fernandez	2003	Journal	Yes	Yes	Brazil			Chacara XV de Novembro		GoogleEarth	-23	31	58	-46	21	43	-23.5328	-46.3619	No	Yes	No		P	1998	2				Yes
145	M A	Uchoa-Fernandez	2003	Journal	Yes	Yes	Brazil			Chacara XV de Novembro									#DIV/0!	#DIV/0!	No	Yes	No		P	1998	12				Yes
147	M L	Vadora	1990	Journal	Yes	Yes	Uruguay	Salto		Salto region		GoogleEarth	-31	27	41	-57	6	25	-31.4614	-57.1069	No	No	Yes		P	1988	1		High	Yes	Yes	McPjail traps baited with Buminal hydrolyzed protein	8.29	Jackson traps with trimedlure		Adult
147	M L	Vadora	1990	Journal	Yes	Yes	Uruguay	Salto		Salto region		GoogleEarth	-31	27	41	-57	6	25	-31.4614	-57.1069	No	No	Yes		P	1988	2		Peak	Yes	Yes	McPjail traps baited with Buminal hydrolyzed protein	11	Jackson traps with trimedlure		Adult
147	M L	Vadora	1990	Journal	Yes	Yes	Uruguay	Salto		Salto region		GoogleEarth	-31	27	41	-57	6	25	-31.4614	-57.1069	No	No	Yes		P	1988	3		High	Yes	Yes	McPjail traps baited with Buminal hydrolyzed protein	7.78	Jackson traps with trimedlure		Adult
147	M L	Vadora	1990	Journal	Yes	Yes	Uruguay	Salto		Salto region		GoogleEarth	-31	27	41	-57	6	25	-31.4614	-57.1069	No	No	Yes		P	1988	4		Low	Yes	Yes	McPjail traps baited with Buminal hydrolyzed protein	1.58	Jackson traps with trimedlure		Adult
147	M L	Vadora	1990	Journal	Yes	Yes	Uruguay	Salto		Salto region		GoogleEarth	-31	27	41	-57	6	25	-31.4614	-57.1069	No	No	Yes		P	1988	5		Marginal	Yes	Yes	McPjail traps baited with Buminal hydrolyzed protein	0.17	Jackson traps with trimedlure		Adult
147	M L	Vadora	1990	Journal	Yes	Yes	Uruguay	Salto		Salto region		GoogleEarth	-31	27	41	-57	6	25	-31.4614	-57.1069	No	No	Yes		P	1988	6		Marginal	Yes	Yes	McPjail traps baited with Buminal hydrolyzed protein	0.05	Jackson traps with trimedlure		Adult
147	M L	Vadora	1990	Journal	Yes	Yes	Uruguay	Salto		Salto region		GoogleEarth	-31	27	41	-57	6	25	-31.4614	-57.1069	No	No	Yes		P	1988	7		Marginal	Yes	Yes	McPjail traps baited with Buminal hydrolyzed protein	0.02	Jackson traps with trimedlure		Adult
147	M L	Vadora	1990	Journal	Yes	Yes	Uruguay	Salto		Salto region		GoogleEarth	-31	27	41	-57	6	25	-31.4614	-57.1069	No	No	Yes		P	1988	8		None	No	Yes	McPjail traps baited with Buminal hydrolyzed protein	0	Jackson traps with trimedlure		Adult
147	M L	Vadora	1990	Journal	Yes	Yes	Uruguay	Salto		Salto region		GoogleEarth	-31	27	41	-57	6	25	-31.4614	-57.1069	No	No	Yes		P	1988	9		Marginal	Yes	Yes	McPjail traps baited with Buminal hydrolyzed protein	0.07	Jackson traps with trimedlure		Adult
147	M L	Vadora	1990	Journal	Yes	Yes	Uruguay	Salto		Salto region		GoogleEarth	-31	27	41	-57	6	25	-31.4614	-57.1069	No	No	Yes		P	1988	10		Marginal	Yes	Yes	McPjail traps baited with Buminal hydrolyzed protein	0.02	Jackson traps with trimedlure		Adult
147	M L	Vadora	1990	Journal	Yes	Yes	Uruguay	Salto		Salto region		GoogleEarth	-31	27	41	-57	6	25	-31.4614	-57.1069	No	No	Yes		P	1988	11		Low	Yes	Yes	McPjail traps baited with Buminal hydrolyzed protein	0.07	Jackson traps with trimedlure		Adult
147	M L	Vadora	1990	Journal	Yes	Yes	Uruguay	Salto		Salto region		GoogleEarth	-31	27	41	-57	6	25	-31.4614	-57.1069	No	No	Yes		P	1988	12		Low	Yes	Yes	McPjail traps baited with Buminal hydrolyzed protein	0.66	Jackson traps with trimedlure		Adult
147	M L	Vadora	1990	Journal	Yes	Yes	Uruguay	Salto		Salto region		GoogleEarth	-31	27	41	-57	6	25	-31.4614	-57.1069	No	No	Yes		P	1989	1		Low	Yes	Yes	McPjail traps baited with Buminal hydrolyzed protein	0.4	Jackson traps with trimedlure		Adult
147	M L	Vadora	1990	Journal	Yes	Yes	Uruguay	Salto		Salto region		GoogleEarth	-31	27	41	-57	6	25	-31.4614	-57.1069	No	No	Yes		P	1989	2		Low	Yes	Yes	McPjail traps baited with Buminal hydrolyzed protein	0.51	Jackson traps with trimedlure		Adult
147	M L	Vadora	1990	Journal	Yes	Yes	Uruguay	Salto		Salto region		GoogleEarth	-31	27	41	-57	6	25	-31.4614	-57.1069	No	No	Yes		P	1989	3		Low	Yes	Yes	McPjail traps baited with Buminal hydrolyzed protein	0.09	Jackson traps with trimedlure		Adult
147	M L	Vadora	1990	Journal	Yes	Yes	Uruguay	Salto		Salto region		GoogleEarth	-31	27	41	-57	6	25	-31.4614	-57.1069	No	No	Yes		P	1989	4		Low	Yes	Yes	McPjail traps baited with Buminal hydrolyzed protein	0.21	Jackson traps with trimedlure		Adult
147	M L	Vadora	1990	Journal	Yes	Yes	Uruguay	Salto		Salto region		GoogleEarth	-31	27	41	-57	6	25	-31.4614	-57.1069	No	No	Yes		P	1989	5		Low	Yes	Yes	McPjail traps baited with Buminal hydrolyzed protein	0.13	Jackson traps with trimedlure		Adult
147	M L	Vadora	1990	Journal	Yes	Yes	Uruguay	Salto		Salto region		GoogleEarth	-31	27	41	-57	6	25	-31.4614	-57.1069	No	No	Yes		P	1989	6		Low	Yes	Yes	McPjail traps baited with Buminal hydrolyzed protein	0.48	Jackson traps with trimedlure		Adult
147	M L	Vadora	1990	Journal	Yes	Yes	Uruguay	Salto		Salto region		GoogleEarth	-31	27	41	-57	6	25	-31.4614	-57.1069	No	No	Yes		P	1989	7		Low	Yes	Yes	McPjail traps baited with Buminal hydrolyzed protein	0.25	Jackson traps with trimedlure		Adult
147	M L	Vadora	1990	Journal	Yes	Yes	Uruguay	Salto		Salto region		GoogleEarth	-31	27	41	-57	6	25	-31.4614	-57.1069	No	No	Yes		P	1989	8		Low	Yes	Yes	McPjail traps baited with Buminal hydrolyzed protein	0.11	Jackson traps with trimedlure		Adult
147	M L	Vadora	1990	Journal	Yes	Yes	Uruguay	Salto		Salto region		GoogleEarth	-31	27	41	-57	6	25	-31.4614	-57.1069	No	No	Yes		P	1989	9		Low	Yes	Yes	McPjail traps baited with Buminal hydrolyzed protein	0.11	Jackson traps with trimedlure		Adult
147	M L	Vadora	1990	Journal	Yes	Yes	Uruguay	Salto		Salto region		GoogleEarth	-31	27	41	-57	6	25	-31.4614	-57.1069	No	No	Yes		P	1989	10		Low	Yes	Yes	McPjail traps baited with Buminal hydrolyzed protein	0.39	Jackson traps with trimedlure		Adult
147	M L	Vadora	1990	Journal	Yes	Yes	Uruguay	Salto		Salto region		GoogleEarth	-31	27	41	-57	6	25	-31.4614	-57.1069	No	No	Yes		P	1989	11		Low	Yes	Yes	McPjail traps baited with Buminal hydrolyzed protein	1.31	Jackson traps with trimedlure		Adult
147	M L	Vadora	1990	Journal	Yes	Yes	Uruguay	Salto		Salto region		GoogleEarth	-31	27	41	-57	6	25	-31.4614	-57.1069	No	No	Yes		P	1989	12		Peak	Yes	Yes	McPjail traps baited with Buminal hydrolyzed protein	8.88	Jackson traps with trimedlure		Adult
147	M L	Vadora	1990	Journal	Yes	Yes	Uruguay	Salto		Salto region		GoogleEarth	-31	27	41	-57	6	25	-31.4614	-57.1069	No	No	Yes		P	1990	1		High	Yes	Yes	McPjail traps baited with Buminal hydrolyzed protein	3.94	Jackson traps with trimedlure		Adult
147	M L	Vadora	1990	Journal	Yes	Yes	Uruguay	Salto		Salto region		GoogleEarth	-31	27	41	-57	6	25	-31.4614	-57.1069	No	No	Yes		P	1990	2		High	Yes	Yes	McPjail traps baited with Buminal hydrolyzed protein	2.97	Jackson traps with trimedlure		Adult
147	M L	Vadora	1990	Journal	Yes	Yes	Uruguay	Salto		Salto region		GoogleEarth	-31	27	41	-57	6	25	-31.4614	-57.1069	No	No	Yes		P	1990	3		High	Yes	Yes	McPjail traps baited with Buminal hydrolyzed protein	3.61	Jackson traps with trimedlure		Adult
147	M L	Vadora	1990	Journal	Yes	Yes	Uruguay	Salto		Salto region		GoogleEarth	-31	27	41	-57	6	25	-31.4614	-57.1069	No	No	Yes		P	1990	4		High	Yes	Yes	McPjail traps baited with Buminal hydrolyzed protein	2.65	Jackson traps with trimedlure		Adult
147	M L	Vadora	1990	Journal	Yes	Yes	Uruguay	Salto		Salto region		GoogleEarth	-31	27	41	-57	6	25	-31.4614	-57.1069	No	No	Yes		P	1990	5		Low	Yes	Yes	McPjail traps baited with Buminal hydrolyzed protein	0.6	Jackson traps with trimedlure		Adult
147	M L	Vadora	1990	Journal	Yes	Yes	Uruguay	Salto		Salto region		GoogleEarth	-31	27	41	-57	6	25	-31.4614	-57.1069	No	No	Yes		P	1990	6		Marginal	Yes	Yes	McPjail traps baited with Buminal hydrolyzed protein	0.04	Jackson traps with trimedlure		Adult
132	D F	Segura	2004	Journal	Yes	Yes	Argentina	Buenos Aires		San Pedro		GoogleEarth	-33	40	55	-59	39	54	-33.6819	-59.665	No	Yes	No		P	1999	11		None	No	Yes					Adult
132	D F	Segura	2004	Journal	Yes	Yes	Argentina	Buenos Aires		San Pedro		GoogleEarth	-33	40	55	-59	39	54	-33.6819	-59.665	No	Yes	No		P	1999	12		Marginal	Yes	Yes					Adult
132	D F	Segura	2004	Journal	Yes	Yes	Argentina	Buenos Aires		San Pedro		GoogleEarth	-33	40	55	-59	39	54	-33.6819	-59.665	No	Yes	No		P	2000	1		Low	Yes	Yes					Adult
132	D F	Segura	2004	Journal	Yes	Yes	Argentina	Buenos Aires		San Pedro		GoogleEarth	-33	40	55	-59	39	54	-33.6819	-59.665	No	Yes	No		P	2000	2		Peak	Yes	Yes					Adult
132	D F	Segura	2004	Journal	Yes	Yes	Argentina	Buenos Aires		San Pedro		GoogleEarth	-33	40	55	-59	39	54	-33.6819	-59.665	No	Yes	No		P	2000	3		High	Yes	Yes					Adult
132	D F	Segura	2004	Journal	Yes	Yes	Argentina	Buenos Aires		San Pedro		GoogleEarth	-33	40	55	-59	39	54	-33.6819	-59.665	No	Yes	No		P	2000	4		Low	Yes	Yes					Adult
132	D F	Segura	2004	Journal	Yes	Yes	Argentina	Buenos Aires		San Pedro		GoogleEarth	-33	40	55	-59	39	54	-33.6819	-59.665	No	Yes	No		P	2000	5		High	Yes	Yes					Adult
148	R I	Vargas	1989	Journal	Yes	Yes	United States	Hawaii	Oahu	Walanae and Makaha Valley		GoogleEarth	21	27	11	-158	11	20	21.4531	-158.189	No	No	Yes		P	1985	11		High	Yes	Yes	traps baited with trimedlure	250			Adult	coffee	mangoe	guava
148	R I	Vargas	1989	Journal	Yes	Yes	United States	Hawaii	Oahu	Walanae and Makaha Valley		GoogleEarth	21	27	11	-158	11	20	21.4531	-158.189	No	No	Yes		P	1985	12		Low	Yes	Yes	traps baited with trimedlure	110			Adult	coffee	mangoe	guava
148	R I	Vargas	1989	Journal	Yes	Yes	United States	Hawaii	Oahu	Walanae and Makaha Valley		GoogleEarth	21	27	11	-158	11	20	21.4531	-158.189	No	No	Yes		P	1986	1		Low	Yes	Yes	traps baited with trimedlure	70			Adult	coffee	mangoe	guava
148	R I	Vargas	1989	Journal	Yes	Yes	United States	Hawaii	Oahu	Walanae and Makaha Valley		GoogleEarth	21	27	11	-158	11	20	21.4531	-158.189	No	No	Yes		P	1986	2		Low	Yes	Yes	traps baited with trimedlure	80			Adult	coffee	mangoe	guava
148	R I	Vargas	1989	Journal	Yes	Yes	United States	Hawaii	Oahu	Walanae and Makaha Valley		GoogleEarth	21	27	11	-158	11	20	21.4531	-158.189	No	No	Yes		P	1986	3		High	Yes	Yes	traps baited with trimedlure	190			Adult	coffee	mangoe	guava
148	R I	Vargas	1989	Journal	Yes	Yes	United States	Hawaii	Oahu	Walanae and Makaha Valley		GoogleEarth	21	27	11	-158	11	20	21.4531	-158.189	No	No	Yes		P	1986	4		High	Yes	Yes	traps baited with trimedlure	240			Adult	coffee	mangoe	guava
148	R I	Vargas	1989	Journal	Yes	Yes	United States	Hawaii	Oahu	Walanae and Makaha Valley		GoogleEarth	21	27	11	-158	11	20	21.4531	-158.189	No	No	Yes		P	1986	5		Peak	Yes	Yes	traps baited with trimedlure	550			Adult	coffee	mangoe	guava
148	R I	Vargas	1989	Journal	Yes	Yes	United States	Hawaii	Oahu	Walanae and Makaha Valley		GoogleEarth	21	27	11	-158	11	20	21.4531	-158.189	No	No	Yes		P	1986	6		High	Yes	Yes	traps baited with trimedlure	200			Adult	coffee	mangoe	guava
148	R I	Vargas	1989	Journal	Yes	Yes	United States	Hawaii	Oahu	Walanae and Makaha Valley		GoogleEarth	21	27	11	-158	11	20	21.4531	-158.189	No	No	Yes		P	1986	7		Peak	Yes	Yes	traps baited with trimedlure	370			Adult	coffee	mangoe	guava
148	R I	Vargas	1989	Journal	Yes	Yes	United States	Hawaii	Oahu	Walanae and Makaha Valley		GoogleEarth	21	27	11	-158	11	20	21.4531	-158.189	No	No	Yes		P	1986	8		High	Yes	Yes	traps baited with trimedlure	180			Adult	coffee	mangoe	guava
148	R I	Vargas	1989	Journal	Yes	Yes	United States	Hawaii	Oahu	Walanae and Makaha Valley		GoogleEarth	21	27	11	-158	11	20	21.4531	-158.189	No	No	Yes		P	1986	9		Low	Yes	Yes	traps baited with trimedlure	30			Adult	coffee	mangoe	guava
148	R I	Vargas	1989	Journal	Yes	Yes	United States	Hawaii	Oahu	Walanae and Makaha Valley		GoogleEarth	21	27	11	-158	11	20	21.4531	-158.189	No	No	Yes		P	1986	10		Low	Yes	Yes	traps baited with trimedlure	55			Adult	coffee	mangoe	guava
148	R I	Vargas	1989	Journal	Yes	Yes	United States	Hawaii	Oahu	Mokulela Coast		GoogleEarth	21	34	48	-158	8	42	21.58	-158.145	No	No	Yes		P	1985	11		Low	Yes	Yes	traps baited with trimedlure	3			Adult	citrus	false kamani	mock orange
148	R I	Vargas	1989	Journal	Yes	Yes	United States	Hawaii	Oahu	Mokulela Coast		GoogleEarth	21	34	48	-158	8	42	21.58	-158.145	No	No	Yes		P	1985	12		High	Yes	Yes	traps baited with trimedlure	7			Adult	citrus	false kamani	mock orange
148	R I	Vargas	1989	Journal	Yes	Yes	United States	Hawaii	Oahu	Mokulela Coast		GoogleEarth	21	34	48	-158	8	42	21.58	-158.145	No	No	Yes		P	1986	1		Peak	Yes	Yes	traps baited with trimedlure	11			Adult	citrus	false kamani	mock orange
148	R I	Vargas	1989	Journal	Yes	Yes	United States	Hawaii	Oahu	Mokulela Coast		GoogleEarth	21	34	48	-158	8	42	21.58	-158.145	No	No	Yes		P	1986	2		Peak	Yes	Yes	traps baited with trimedlure	11			Adult	citrus	false kamani	mock orange
148	R I	Vargas	1989	Journal	Yes	Yes	United States	Hawaii	Oahu	Mokulela Coast		GoogleEarth	21	34	48	-158	8	42	21.58	-158.145	No	No	Yes		P	1986	3		High	Yes	Yes	traps baited with trimedlure	10			Adult	citrus	false kamani	mock orange
148	R I	Vargas	1989	Journal	Yes	Yes	United States	Hawaii	Oahu	Mokulela Coast		GoogleEarth	21	34	48	-158	8	42	21.58	-158.145	No	No	Yes		P	1986	4		Peak	Yes	Yes	traps baited with trimedlure	12			Adult	citrus	false kamani	mock orange
148	R I	Vargas	1989	Journal	Yes	Yes	United States	Hawaii	Oahu	Mokulela Coast		GoogleEarth	21	34	48	-158	8	42	21.58	-158.145	No	No	Yes		P	1986	5		High	Yes	Yes	traps baited with trimedlure	5			Adult	citrus	false kamani	mock orange
148	R I	Vargas	1989	Journal	Yes	Yes	United States	Hawaii	Oahu	Mokulela Coast		GoogleEarth	21	34	48	-158	8	42	21.58	-158.145	No	No	Yes		P	1986	6		Low	Yes	Yes	traps baited with trimedlure	2			Adult	citrus	false kamani	mock orange
148	R I	Vargas	1989	Journal	Yes	Yes	United States	Hawaii	Oahu	Mokulela Coast		GoogleEarth	21	34	48	-158	8	42	21.58	-158.145	No	No	Yes		P	1986	7		Low	Yes	Yes	traps baited with trimedlure	2			Adult	citrus	false kamani	mock orange
148	R I	Vargas	1989	Journal	Yes	Yes	United States	Hawaii	Oahu	Mokulela Coast		GoogleEarth	21	34	48	-158	8	42	21.58	-158.145	No	No	Yes		P	1986	8		Low	Yes	Yes	traps baited with trimedlure	1			Adult	citrus	false kamani	mock orange
148	R I	Vargas	1989	Journal	Yes	Yes	United States	Hawaii	Oahu	Mokulela Coast		GoogleEarth	21	34	48	-158	8	42	21.58	-158.145	No	No	Yes		P	1986	9		Low	Yes	Yes	traps baited with trimedlure	2			Adult	citrus	false kamani	mock orange
148	R I	Vargas	1989	Journal	Yes	Yes	United States	Hawaii	Oahu	Mokulela Coast		GoogleEarth	21	34	48	-158	8	42	21.58	-158.145	No	No	Yes		P	1986	10		Low	Yes	Yes	traps baited with trimedlure	2			Adult	citrus	false kamani	mock orange
148	R I	Vargas	1989	Journal	Yes	Yes	United States	Hawaii	Oahu	North Waianae Mountains		GoogleEarth	21	29	57	-158	9	19	21.4992	-158.155	No	No	Yes		T	1985	11		Low	Yes	Yes	traps baited with trimedlure	1.5			Adult	guava
148	R I	Vargas	1989	Journal	Yes	Yes	United States	Hawaii	Oahu	North Waianae Mountains		GoogleEarth	21	29	57	-158	9	19	21.4992	-158.155	No	No	Yes		T	1985	12		Marginal	Yes	Yes	traps baited with trimedlure	0.3			Adult	guava
148	R I	Vargas	1989	Journal	Yes	Yes	United States	Hawaii	Oahu	North Waianae Mountains		GoogleEarth	21	29	57	-158	9	19	21.4992	-158.155	No	No	Yes		T	1986	1		None	No	Yes	traps baited with trimedlure	0			Adult	guava
148	R I	Vargas	1989	Journal	Yes	Yes	United States	Hawaii	Oahu	North Waianae Mountains		GoogleEarth	21	29	57	-158	9	19	21.4992	-158.155	No	No	Yes		T	1986	2		None	No	Yes	traps baited with trimedlure	0			Adult	guava
148	R I	Vargas	1989	Journal	Yes	Yes	United States	Hawaii	Oahu	North Waianae Mountains		GoogleEarth	21	29	57	-158	9	19	21.4992	-158.155	No	No	Yes		T	1986	3		None	No	Yes	traps baited with trimedlure	0			Adult	guava
148	R I	Vargas	1989	Journal	Yes	Yes	United States	Hawaii	Oahu	North Waianae Mountains		GoogleEarth	21	29	57	-158	9	19	21.4992	-158.155	No	No	Yes		T	1986	4		Marginal	Yes	Yes	traps baited with trimedlure	0.3			Adult	guava
148	R I	Vargas	1989	Journal	Yes	Yes	United States	Hawaii	Oahu	North Waianae Mountains		GoogleEarth	21	29	57	-158	9	19	21.4992	-158.155	No	No	Yes		T	1986	5		None	No	Yes	traps baited with trimedlure	0			Adult	guava
148	R I	Vargas	1989	Journal	Yes	Yes	United States	Hawaii	Oahu	North Waianae Mountains		GoogleEarth	21	29	57	-158	9	19	21.4992	-158.155	No	No	Yes		T	1986	6		None	No	Yes	traps baited with trimedlure	0			Adult	guava
148	R I	Vargas	1989	Journal	Yes	Yes	United States	Hawaii	Oahu	North Waianae Mountains		GoogleEarth	21	29	57	-158	9	19	21.4992	-158.155	No	No	Yes		T	1986	7		None	No	Yes	traps baited with trimedlure	0			Adult	guava
148	R I	Vargas	1989	Journal	Yes	Yes	United States	Hawaii	Oahu	North Waianae Mountains		GoogleEarth	21	29	57	-158	9	19	21.4992	-158.155	No	No	Yes		T	1986	8		None	No	Yes	traps baited with trimedlure	0			Adult	guava
148	R I	Vargas	1989	Journal	Yes	Yes	United States	Hawaii	Oahu	North Waianae Mountains		GoogleEarth	21	29	57	-158	9	19	21.4992	-158.155	No	No	Yes		T	1986	9		Peak	Yes	Yes	traps baited with trimedlure	2			Adult	guava
148	R I	Vargas	1989	Journal	Yes	Yes	United States	Hawaii	Oahu	North Waianae Mountains		GoogleEarth	21	29	57	-158	9	19	21.4992	-158.155	No	No	Yes		T	1986	10		Low	Yes	Yes	traps baited with trimedlure	1			Adult	guava
[truncated: 452 more rows]

## Sheet: SOURCE_ID
SOURCE_ID	REVIEWED	PRESENCE_DATA	SEASONALITY_DATA	CITED_BY	Notes	AUTHOR_TITLE	REVIEWED	149	TOTAL	165	PERCENT	0.90303
1	1	1	1			Abdel-Galil, F. A., Amro, M. A., Abdel-Moniem, A. S. H., & El-Fandary, O. O. (2009). Population fluctuations and interspecific competition between Tephritid flies attacking fruit crops in the New Valley oases, Egypt. Archives Of Phytopathology And Plant Protection, 43(7), 647–659. doi:10.1080/03235400802021272
2	1	0	0	MCA		Aguiar, E. de, Menezes, E.B. (1996). Population dynamics of fruit flies in Itaguaí County, State of Rio de Janeiro, Brazil. I-Survey of the species. Fruit Fly Pests: A world assessment of their biology and management (ed. by B.A. McPehron and G.J. Steck), pp 321-323. St Lucie Press, Florida.
3	1	0	0			Aguiar-Menezes, E. L., Menezes, E. B., Silva, P. S., Bittar, A. C., & Cassino, P. C. R. (2001). Native Hymenopteran Parasitoids Associated with Anastrepha spp. (Diptera: Tephritidae) in Seropedica City, Rio de Janeiro, Brazil. The Florida Entomologist, 84(4), 706–711. doi:10.2307/3496405
4	1	1	1			Aguirre, C. L. (1997). Distribución y registros de las principales especies de moscas de las frutas(diptera. IICA Biblioteca Venezuela.
5	1	1	1			A. ALEMANY, M. A. MIRANDA, R. ALONSO, C. MARTÍN ESCORZA. 2004.Efectividad del trampeo masivo de hembras de Ceratitis capitata (Diptera: Tephritidae) a base de atrayentes alimentarios. "Efecto-borde" y papel de los frutales abandonados como potenciadores de la plaga
6	1	1	0			Aluja, M., Sivinski, J., Rull, J., & Hodgson, P. J. (2005). Behavior and predation of fruit fly larvae (Anastrepha spp.)(Diptera: Tephritidae) after exiting fruit in four types of habitats in tropical Veracruz, Mexico. Environmental entomology, 34(6), 1507–1516.
7	1	1	0			Animal Plant and Health Inspection Service, & Miller, C. (1992). Risk assessment, Mediterranean fruit fly. [Washington D.C.?]: Planning and Risk Analysis Systems Policy and Program Development APHIS USDA.
8	1	0	0			Argov, Y., & Gazit, Y. (2008). Biological control of the Mediterranean fruit fly in Israel: Introduction and establishment of natural enemies. Biological Control, 46(3), 502–507. doi:10.1016/j.biocontrol.2008.04.021
9	1	1	1			Augler et al. EEAOC. Chapter VI. Fruit flies and its quarantine relevance in the citriculture of Northwestern Argentina. Eleven years of research 1996-2007
10	0	0	0			Avery, J. W., Chambers, D. L., Cunningham, R. T., & Leonhardt, B. A. (1994). Use of ceralure and trimedlure in Mediterranean fruit fly (Diptera: Tephritidae) mass-trapping tests. Journal of Entomological Science, 29(4), 543–556.
11	0	0	0			Baker, R. H. A. (1996). Developing a European pest risk mapping system 1. EPPO Bulletin, 26(3‐4), 485–494. doi:10.1111/j.1365-2338.1996.tb01491.x
12	1	0	0			Baker, R. H. A., Sansford, C. E., Jarvis, C. H., Cannon, R. J. C., MacLeod, A., & Walters, K. F. A. (2000). The role of climatic mapping in predicting the potential geographical distribution of non-indigenous pests under current and future climates. Agriculture, Ecosystems & Environment, 82(1-3), 57–71. doi:10.1016/S0167-8809(00)00216-4
13	1	1	0			Bariani, R., Casarini, V., Canobbio, G., Fredditori, M., Inversini, M., & Lovazzano, A. (n.d.). Osservazioni sulla biologia e sul comportamento della Ceratitis capitata nell’Oltrepo pavese e zone limitrofe.
14	1	0	0			Barr, N. B. (2009). Pathway Analysis of Ceratitis capitata (Diptera: Tephritidae) Using Mitochondrial DNA. Journal of Economic Entomology, 102(1), 401–411. doi:10.1603/029.102.0153
15	1	1	1			Batllori, L., Escudero, A., Vilajeliu, M., Garcia, F., & Benejam, J. (2008). Area-wide mass trapping to control Ceratitis capitata (Wied.) on stone fruits in Girona, NE of Spain. Integrated Plant Protection in Stone Fruit. IOBC/wprs Bulletin, 37, 73–82.
16	1	1	1			Bjeliš, M., Ljubetić, V., & Novosel, N. (n.d.). control of Medfly by SIt in the nereva river Valley.
17	1	1	1			Bjeliš, M., Radunić, D., Masten, T., & Kotlar, A. (7). Spatial distribution and temporal outbreaks of medfly Ceratitis capitata Wied.(Diptera, Tephritidae) in Republic of Croatia. 8th Slovenian conference on plant protection.
18	1	0	0	MCA		Bjeliš, M. & Pelicarić, V. (2004) Tephritid fruit fly pests in Croatia: an overview of damage and current control strategies. Proceedings of the 6th International Symposium on Fruit Flies of Economic Importance (ed. by B. Barnes), pp 325-329. Isteg Scientific Publications, Irene.
19	1	1	1			Bloem, K., Chambers, D., Bloem, S., & Muniz, E. (1993). Relative effectiveness of Jackson and McPhail traps: a year-long comparison in coffee in Guatemala. Springer Verlag.
20	1	0	0			Bohonak, A. J., Davies, N., Villablanca, F. X., & Roderick, G. K. (2001). Invasion genetics of New World medflies: testing alternative colonization scenarios. Biological Invasions, 3(2), 103–111.
21	1	1	1			Bonizzoni, M., Guglielmino, C. R., Smallridge, C. J., Gomulski, M., Malacrida, a. R., & Gasperi, G. (2004). On the origins of medfly invasion and expansion in Australia. Molecular Ecology, 13(12), 3845–3855. doi:10.1111/j.1365-294X.2004.02371.x
22	1	1	1			Borge, M. Niklaus-Ruiz, and T. Basedow. 1997. “A Survey on the Occurrence and Flight Periods of Fruit Fly Species (Diptera: Tephritidae) in a Fruit Growing Area in Southwest Nicaragua, 1994/95.” Bulletin of Entomological Research 87 (04): 405–412. doi:10.1017/S000748530003741X.
23	1	0	0			Cáceres, C., Ramírez, E., Wornoayporn, V., Mohammad Islam, S., & Ahmad, S. (2007). A PROTOCOL FOR STORAGE AND LONG-DISTANCE SHIPMENT OF MEDITERRANEAN FRUIT FLY (DIPTERA: TEPHRITIDAE) EGGS. I. EFFECT OF TEMPERATURE, EMBRYO AGE, AND STORAGE TIME ON SURVIVAL AND QUALITY. Florida Entomologist, 90, 103–109. doi:10.1653/0015-4040(2007)90[103:APFSAL]2.0.CO;2
24	1	1	0	MCA		Callejas, C. & Ochando, M.D. (2004) SOD sequences in Ceratitis capitata (Diptera: Tephritidae) samples from different geographic origins. Proceedings of the 6th International Symposium on Fruit Flies of Economic Importance (ed. by B. Barnes), pp 435-438. Isteg Scientific Publications, Irene.
25	1	1	0			Carey. (1991). Establishment of the Mediterranean fruit fly in California. Science, 253(5026), 1369 –1373. doi:10.1126/science.1896848
26	1	1	0			Carey, J. R. (October). The future of the Mediterranean fruit fly Ceratitis capitata invasion of California: A predictive framework. Biological Conservation, 78(1-2), 35–50. doi:10.1016/0006-3207(96)00016-X
27	1	0	0			Carey, J. R. (2011). Biodemography of the Mediterranean fruit fly: Aging, longevity and adaptation in the wild. Experimental Gerontology, 46(5), 404–411. doi:10.1016/j.exger.2010.09.009
28	1	1	1			Carey, J. R., Papadopoulos, N. T., Müller, H., Katsoyannos, B. I., Kouloussis, N. A., Wang, J., Wachter, K., et al. (2008). Age structure changes and extraordinary lifespan in wild medfly populations. Aging Cell, 7(3), 426–437. doi:10.1111/j.1474-9726.2008.00390.x
29	1	0	0	MCA		Cayol, J.P., Rössler, Y., Weiss, M., Bahdousheh, M., Oman, M., Hamalawi, M. &Almughayyar, A. (2004) Fruit fly control and monitoring in the Near East: shared concern in a regional transboundary problem. Proceedings of the 6th International Symposium on Fruit Flies of Economic Importance (ed. by B. Barnes), pp 155-171. Isteg Scientific Publications, Irene.
30	1	1	1			Cayol, J. P., & Causse, R. (2009a). Mediterranean fruit fly Ceratitis capitata Wiedemann (Dipt., Trypetidae) back in Southern France. Journal of Applied Entomology, 116(1‐5), 94–100. doi:10.1111/j.1439-0418.1993.tb01172.x
31	1	1	1			Cayol, J. P., & Causse, R. (2009b). Mediterranean fruit fly Ceratitis capitata Wiedemann (Dipt., Trypetidae) back in Southern France. Journal of Applied Entomology, 116(1‐5), 94–100. doi:10.1111/j.1439-0418.1993.tb01172.x
32	1	0	0			CELEDONIO-HURTADO, H., ALUJA, M., & LIEDO, P. (1995). Adult Population Fluctuations of Anastrepha Species (Diptera: Tephritidae) in Tropical Orchard Habitats of Chiapas, Mexico. Environmental Entomology, 24(4), 861–869.
33	1	0	0			Cohen, Y., Cohen, A., Hetzroni, A., Alchanatis, V., Broday, D., Gazit, Y., & Timar, D. (2008). Spatial decision support system for Medfly control in citrus. Computers and Electronics in Agriculture, 62(2), 107–117. doi:10.1016/j.compag.2007.12.005
34	1	1	0			Copeland, R. S., Wharton, R. A., Luke, Q., & De Meyer, M. (2002). Indigenous Hosts of Ceratitis capitata (Diptera:Tephritidae) in Kenya. Annals of the Entomological Society of America, 95(6), 672–694. doi:10.1603/0013-8746(2002)095[0672:IHOCCD]2.0.CO;2
35	1	0	0	MCA		Dantas, L., Pereira, R., Silva, N., Rodrigues, A. & Costa, R. (2004) The SIT control programme against Medfly on Madeira Island. Proceedings of the 6th International Symposium on Fruit Flies of Economic Importance (ed. by B. Barnes), pp 127-130. Isteg Scientific Publications, Irene.
36	1	1	0			Davies, N., Villablanca, F. X., & Roderick, G. K. (1999). Bioinvasions of the Medfly Ceratitis Capitata: Source Estimation Using DNA Sequences at Multiple Intron Loci. Genetics, 153(1), 351–360.
37	1	1	0			De Lima, C. (2007). Area Wide Management of Mediterranean Fruit Fly in Australia. VIII International Symposium on Modelling in Fruit Research and Orchard Management 803 (pp. 51–60).
38	1	1	1			De Meyer, M., Robertson, M. P., Peterson, A. T., & Mansell, M. W. (2008). Ecological niches and potential geographical distributions of Mediterranean fruit fly (Ceratitis capitata) and Natal fruit fly (Ceratitis rosa). Journal of Biogeography, 35(2), 270–281. doi:10.1111/j.1365-2699.2007.01769.x
39	1	0	0			Demirel, N. (2007). Behavior Paradigms in the Mediterranean Fruit Fly. Journal of Entomology, 4(2), 129–135.
40	1	1	0			Diamantidis, A. D., Carey, J. R., Nakas, C. T., & Papadopoulos, N. T. (2011). Ancestral populations perform better in a novel environment: domestication of Mediterranean fruit fly populations from five global regions. Biological Journal of the Linnean Society, 102(2), 334–345. doi:10.1111/j.1095-8312.2010.01579.x
41	1	1	0			Dominiak, B. C., & Daniels, D. (n.d.). Review of the past and present distribution of Mediterranean fruit fly (Ceratitis capitata Wiedemann) and Queensland fruit fly (Bactrocera tryoni Froggatt) in Australia. Australian Journal of Entomology. doi:10.1111/j.1440-6055.2011.00842.x
42	1	1	0			Duyck, P., David, P., Quilici, S., Duyck, P., David, P., & Quilici, S. (2006). Climatic niche partitioning following successive invasions by fruit flies in La Réunion, Climatic niche partitioning following successive invasions by fruit flies in La Réunion. Journal of Animal Ecology, Journal of Animal Ecology, 75, 75(2, 2), 518, 518–526, 526. doi:10.1111/j.1365-2656.2006.01072.x, 10.1111/j.1365-26…
43	1	0	0			Duyck, P. f., & Quilici, S. (2002). Survival and Development of Different Life Stages of Three Ceratitis Spp. (Diptera: Tephritidae) Reared at Five Constant Temperatures. Bulletin of Entomological Research, 92(06), 461–469. doi:10.1079/BER2002188
44	1	1	1			El Keroumi, A., Naamani, K., Dahbi, A., Luque, I., Carvajal, A., Cerda, X., & Boulay, R. (2010). Effect of ant predation and abiotic factors on the mortality of medfly larvae, Ceratitis capitata, in the Argan forest of Western Morocco. Biocontrol Science and Technology, 20(7), 751–762. doi:10.1080/09583151003734651
45	1	1	1			Saleh Ahman and El-Hamalawii, A. S. (2004). The Population Dynamics of the Mediterranean Fruit Fly, Ceratitis capitata Wied. Diptera: Tephritidae in Some Fruit Orchards in Gaza Strip. An-Najah University Journal for Research, 18(2), 249–265.
46	0	0	0			Enkerlin, W., & Mumford, J. (1997). Economic Evaluation of Three Alternative Methods for Control of the Mediterranean Fruit Fly (Diptera: Tephritidae) in Israel, Palestinian Territories, and Jorda. Journal of Economic Entomology, 90(5), 1066–1072.
47	1	1	1			Escudero‐Colomar, L. A., Vilajeliu, M., & Batllori, L. (2008). Seasonality in the occurrence of the Mediterranean fruit fly [Ceratitis capitata (Wied.)] in the north‐east of Spain. Journal of Applied Entomology, 132(9‐10), 714–721. doi:10.1111/j.1439-0418.2008.01372.x
48	1	1	1			Eskafi, F. (1990). Parasitism of fruit flies Ceratitis capitata and Anastrepha SPP. [Diptera: Tephritidae] in Guatemala. BioControl, 35(3), 355–362. doi:10.1007/BF02375259
49	1	1	1			Eskafi, Fm, and Me Kolbe. 1990a. “Infestation Patterns of Commonly Cultivated, Edible Fruit Species by Ceratitis-Capitata and Anastrepha Spp (diptera, Tephritidae) in Guatemala and Their Relationship to Environmental-Factors.” Environmental Entomology 19 (5) (October): 1371–1380.
50	1	1	1			Eskafi, Fm, and Mm Kolbe. 1990b. “Predation on Larval and Pupal Ceratitis-Capitata (diptera, Tephritidae) by the Ant Solenopsis-Geminata (Hymenoptera, Formicidae) and Other Predators in Guatemala.” Environmental Entomology 19 (1) (February): 148–153.
51	1	0	0	MCA		Fimiani, P. (1989) Mediterranean region. Fruit Flies: Their Biology, Natural Enemies and Control (ed. by A.S. Robinson and G. Hooper), pp. 39-50. Elsevier, Amsterdam.
52	1	0	0	MCA		Fischer-Colbrie, P. & Busch-Petersen, E. (1989) Temperate Europe and West Asia. Fruit Flies: Their Biology, Natural Enemies and Control (ed. by A.S. Robinson and G. Hooper), pp. 91-99. Elsevier, Amsterdam.
53	0	0	0			GASPARICH, G. E., SILVA, J. G., HAN, H.-Y., MCPHERON, B. A., STECK, G. J., & SHEPPARD, W. S. (1997). Population Genetic Structure of Mediterranean Fruit Fly (Diptera: Tephritidae) and Implications for Worldwide Colonization Patterns. Annals of the Entomological Society of America, 90(6), 790–797.
54	1	1	0			Gasperi, G., Bonizzoni, M., Gomulski, L., Murelli, V., Torti, C., Malacrida, A., & Guglielmino, C. (2002). Genetic differentiation, gene flow and the origin of infestations of the medfly, Ceratitis capitata. Genetica, 116(1), 125–135.
55	1	0	0			Gevrey, M., & Worner, S. P. (2006). Prediction of Global Distribution of Insect Pest Species in Relation to Climate by Using an Ecological Informatics Method. Journal of Economic Entomology, 99(3), 979–986. doi:10.1603/0022-0493-99.3.979
56	1	0	0			Grout, T. G., & Stoltz, K. C. (2007). Developmental Rates at Constant Temperatures of Three Economically Important Ceratitis spp. (Diptera: Tephritidae) From Southern Africa. Environmental Entomology, 36, 1310–1317. doi:10.1603/0046-225X(2007)36[1310:DRACTO]2.0.CO;2
57	1	1	0			Gutierrez, A. P., & Ponti, L. (2011). Assessing the invasive potential of the Mediterranean fruit fly in California and Italy. Biological Invasions. doi:10.1007/s10530-011-9937-6
58	0	0	0			HARRIS, E. J., & LEE, C. Y. L. (1987). Seasonal and Annual Distribution of the Mediterranean Fruit Fly (Diptera: Tephritidae) in Honolulu and Suburban Areas of Oahu, Hawaii. Environmental Entomology, 16(6), 1273–1282.
59	0	0	0			Harris, E. J., & Olalquiaga, G. (1991). Occurrence and Distribution Patterns of Mediterranean Fruit Fly (Diptera: Tephritidae) Desert Areas in Chile and Peru. Environmental Entomology, 20(1), 174–178.
60	0	0	0			Harris, E. J., Vargas, R. I., & Gilmore, J. E. (1993). Seasonality in Occurrence and Distribution of Mediterranean Fruit Fly (Diptera: Tephritidae) in Upland and Lowland Areas on Kauai, Hawaii. Environmental Entomology, 22(2), 404–410.
61	0	0	0			HARRIS, ERNEST J., and CLIFFORD Y. L. LEE. 1986. ‘Seasonal and Annual Occurrence of Mediterranean Fruit Flies (Diptera: Tephritidae) in Makaha and Waianae Valleys, Oahu, Hawaii’. Environmental Entomology 15 (3): 507–512.
62	1	1	0			He, M., Haymer, D. S., He, M., & Haymer, D. S. (1999). Genetic relationships of populations and the origins of new infestations of the Mediterranean fruit fly, Genetic relationships of populations and the origins of new infestations of the Mediterranean fruit fly. Molecular Ecology, Molecular Ecology, 8, 8(8, 8), 1247, 1247–1257, 1257. doi:10.1046/j.1365-294X.1999.00685.x, 10.1046/j.1365-294X.199…
63	1	1	1			Hedström, I. (1993a). Population dynamics and host relationships of neotropical fruit flies (Diptera: Tephritidae) in seasonal and non‐seasonal environments. International Journal of Pest Management, 39(4), 400–410. doi:10.1080/09670879309371831
64	1	0	0	MCA		Hunt, M.K., Nicholls, C.J., Wood, R.J., Prendon, A.P. & Gilburn, A.S. (2004) Sexual selection for symmetrical male medflies (Diptera: Tephritidae) confirmed in the field. Biological Journal of the Linnean Society, 81, 347-355.
65	1	1	1			Israely, N., Ritte, U., & Oman, S. D. (2004). Inability of Ceratitis capitata (Diptera: Tephritidae) to Overwinter in the Judean Hills. Journal of Economic Entomology, 97(1), 33–42. doi:10.1603/0022-0493-97.1.33
66	1	1	1			Israely, N., Yuval, B., Kitron, U., & Nestel, D. (1997). Population Fluctuations of Adult Mediterranean Fruit Flies (Diptera: Tephritidae) in a Mediterranean Heterogeneous Agricultural Region. Environmental Entomology, 26(6), 1263–1269.
67	0	1	1			Israely, N., Ziv, Y., & Oman, S. D. (2005). Spatiotemporal Distribution Patterns of Mediterranean Fruit Fly (Diptera: Tephritidae) in the Central Region of Israel. Annals of the Entomological Society of America, 98, 77–84. doi:10.1603/0013-8746(2005)098[0077:SDPOMF]2.0.CO;2
68	1	1	1			Israely, Nimrod, and Samuel D. Oman. 2005. “Effect of Combined Insecticide Sprays and Sanitation Techniques on Population Dynamics of Ceratitis Capitata (Diptera: Tephritidae) in the Central Mountains of Israel.” Journal of Economic Entomology 98 (3): 739–748. doi:10.1603/0022-0493-98.3.739.
69	1	0	0			Jang, E. B. (2007, December). Fruit flies and their impact on agriculture in Hawaii. Article. Retrieved November 21, 2011, from http://scholarspace.manoa.hawaii.edu/handle/10125/1297
70	1	1	1			Katsoyannos, B. I., Kouloussis, N. A., & Carey, J. R. (1998). Seasonal and Annual Occurrence of Mediterranean Fruit Flies (Diptera: Tephritidae) on Chios Island, Greece: Differences Between Two Neighboring Citrus Orchards. Annals of the Entomological Society of America, 91(1), 43–51.
71	0	0	0			Katsoyannos, Byron I., Robert R. Heath, Nikos T. Papadopoulos, Nancy D. Epsky, and Jorge Hendrichs. 1999. “Field Evaluation of Mediterranean Fruit Fly (Diptera: Tephritidae) Female Selective Attractants for Use in Monitoring Programs.” Journal of Economic Entomology 92 (3): 583–589.
72	1	0	0	MCA		Katsoyannos, B.I., Papadopoulos, N.T., Kouloussis, N.A. & Hendrichs, J. (2004) Effect of citrus peel substances on male Mediterranean fruit fly behaviour. Proceedings of the 6th International Symposium on Fruit Flies of Economic Importance (ed. by B. Barnes), pp 13-17. Isteg Scientific Publications, Irene.
73	1	0	0			Korneyev, V. A. (2003). New and Little-Known Tephritidae (Diptera, Cyclorrhapha) from Europe. Retrieved from http://194.44.242.245:8080/handle/123456789/3781
74	0	0	0			Kourti, A., Loukas, M., & Sourdis, J. (2011). Dispersion pattern of the medfly from its geographic centre of origin and genetic relationships of the medfly with two close relatives. Entomologia Experimentalis et Applicata, 63(1), 63–69. doi:10.1111/j.1570-7458.1992.tb02420.x
75	1	0	0			Kwasi, W. (2009). Assessment of Fruit Fly Damage and Implications for the Dissemination of Management Practices for Mango Production in the Upper West Region of Ghana. Journal of Developments in Sustainable Agriculture, 3(2), 117–134.
76	1	1	0		georeference data from the map. Included in medfly notes doc	Lanzavecchia, S. B., Cladera, J. L., Faccio, P., Petit Marty, N., Vilardi, J. C., & Zandomeni, R. O. (2008). Origin and Distribution of Ceratitis capitata Mitochondrial DNA Haplotypes in Argentina. Annals of the Entomological Society of America, 101(3), 627–638. doi:10.1603/0013-8746(2008)101[627:OADOCC]2.0.CO;2
77	1	0	0	MCA		Larcher-Carvalho, A. & Mumford, J. (2004) Cost-benefit analysis for the suppression of the Mediterranean fruit fly in the Algarve using the sterile insect technique. Proceedings of the 6th International Symposium on Fruit Flies of Economic Importance (ed. by B. Barnes), pp 143-153. Isteg Scientific Publications, Irene.
78	1	0	0			Leza, M. M., Juan, A., Capllonch, M., & Alemany, A. (2008). Female‐biased mass trapping vs. bait application techniques against the Mediterranean fruit fly, Ceratitis capitata (Dipt., Tephritidae). Journal of Applied Entomology, 132(9‐10), 753–761. doi:10.1111/j.1439-0418.2008.01370.x
79	0	0	0			Liquido, N. J., Cunningham, R. T., & Nakagawa, S. (1990). Host Plants of Mediterranean Fruit Fly (Diptera: Tephritidae) on the Island of Hawaii (1949-1985 Survey). Journal of Economic Entomology, 83(5), 1863–1878.
80	1	0	0			Livingston, M. J. (2007). The Mediterranean Fruit Fly: Efficient Dynamic and Static Phytosanitary Measures, Information Values, and Current Policy. 2007 Annual Meeting, July 29-August 1, 2007, Portland, Oregon TN.
81	1	0	0			Lysandrou, M. (2009). Fruit flies in the mediterranean and Arab world: how serious a threat are they and how can we minimize their impact. Arab Journal of Plant Protection, 27(2), 236–239.
82	1	1	1			Maelzer, D. A., Bailey, P. T., & Perepelicia, N. (2004). Factors supporting the non-persistence of fruit fly populations in South Australia. Australian Journal of Experimental Agriculture, 44, 109. doi:10.1071/EA01128
83	1	1	0			Malacrida, A. R., Gomulski, L. M., Bonizzoni, M., Bertin, S., Gasperi, G., & Guglielmino, C. R. (2006). Globalization and fruitfly invasion and expansion: the medfly paradigm. Genetica, 131, 1–9. doi:10.1007/s10709-006-9117-2
84	1	1	0			Malacrida, A. R., Marinoni, F., Torti, C., Gomulski, L. M., Sebastiani, F., Bonvicini, C., Gasperi, G., et al. (1998). Genetic Aspects of the Worldwide Colonization Process of Ceratitis Capitata. Journal of Heredity, 89(6), 501–507. doi:10.1093/jhered/89.6.501
85	1	1	1			Martínez-Ferrer, M. T., Navarro, C., Campos, J. M., Marzal, C., Fibla, J. M., Bargues, L., & Garcia-Marí, F. (2010). Seasonal and annual trends in field populations of Mediterranean fruit fly, Ceratitis capitata, in Mediterranean citrus groves: comparison of two geographic areas in eastern Spain. Spanish Journal of Agricultural Research, 8(3), 757–765.
86	1	0	0			Mavrikakis, P. G., Economopoulos, A. P., & Carey, J. R. (2000). Continuous Winter Reproduction and Growth of the Mediterranean Fruit Fly (Diptera: Tephritidae) in Heraklion, Crete, Southern Greece. Environmental Entomology, 29, 1180–1187. doi:10.1603/0046-225X-29.6.1180
87	1	1	0			McPheron, Bruce A., and Gary J. Steck. 1996. Fruit Fly Pests: A World Assessment of Their Biology and Management. CRC Press.
88	1	1	0			Meats, A., & Smallridge, C. J. (2007). Short‐ and long‐range dispersal of medfly, Ceratitis capitata (Dipt., Tephritidae), and its invasive potential. Journal of Applied Entomology, 131(8), 518–523. doi:10.1111/j.1439-0418.2007.01168.x
89	1	0	0			Medeiros, A., Oliveira, L., & Garcia, P. (2007). Suitability as Medfly Ceratitis capitata (Diptera, Tephritidae) hosts, of seven fruit species growing on the island of São Miguel, Azores. " ARQUIPÉLAGO. Ciências Biológicas e Marinhas, (24), 33–40.
90	1	1	0			Meixner, M. D., McPheron, B. A., Silva, J. G., Gasparich, G. E., & Sheppard, W. S. (2002). The Mediterranean fruit fly in California: evidence for multiple introductions and persistent populations based on microsatellite and mitochondrial DNA variability. Molecular Ecology, 11(5), 891–899. doi:10.1046/j.1365-294X.2002.01488.x
91	1	0	0	MCA		Merz, B., Aartsen, B. van, White, I.M. & Harten, A. van. (2006) Fruit flies (Diptera: Tephritidae) of Yemen. Fauna of Arabia, 21, 365-382.
92	1	1	1			Michelakis, S. E. (1992). Phenology of the Mediterranean fruit fly, Ceratitis capitata Wiedemann in Crete. Israel J. Entomol, 25(26), 177–180.
93	1	1	1			Midgarden, D., & Lira, E. (2006). Ecological relationship of medfly and coffee in Guatemala and Mexico. Proceedings of the 7th International Symposium on Fruit Flies of Economic Importance (pp. 10–15).
94	1	1	0			Mkize, N., Hoelmer, K. A., & Villet, M. H. (2008). A survey of fruit-feeding insects and their parasitoids occurring on wild olives, Olea europaea ssp. cuspidata, in the Eastern Cape of South Africa. Biocontrol Science and Technology, 18(10), 991–1004. doi:10.1080/09583150802450154
95	1	0	0			Mohamed, S. A., Wharton, R. A., Mérey, G. von, & Schulthess, F. (2006). Acceptance and suitability of different host stages of Ceratitis capitata (Wiedemann) (Diptera: Tephritidae) and seven other tephritid fruit fly species to Tetrastichus giffardii Silvestri (Hymenoptera: Eulophidae). Biological Control, 39(3), 262–271. doi:10.1016/j.biocontrol.2006.08.016
96	1	1	0			Morales, Pedro, Mario Cermeli, Freddy Godoy, and Benigna Salas. “A List of Mediterranean Fruit Fly Ceratitis Capitata Wiedemann (Diptera: Tephritidae) Host Plants Based on the Records of INIA-CENIAP Museum of Insects of Agricultural Interest.” Entomotropica 19 (1): 51–54.
97	1	0	0			Müller, H.-G., Wu, S., Diamantidis, A. D., Papadopoulos, N. T., & Carey, J. R. (2009). Reproduction is adapted to survival characteristics across geographically isolated medfly populations. Proceedings of the Royal Society B: Biological Sciences, 276(1677), 4409 –4416. doi:10.1098/rspb.2009.1461
98	1	0	0			Navarro-Campos, C., Martínez-Ferrer, M. T., Campos, J. M., Fibla, J. M., Alcaide, J., Bargues, L., Marzal, C., et al. (2011). The Influence of Host Fruit and Temperature on the Body Size of Adult Ceratitis capitata (Diptera: Tephritidae) Under Laboratory and Field Conditions. Environmental Entomology, 40(4), 931–938. doi:10.1603/EN10302
99	1	0	0			Navarro-Llopis, V., Alfaro, F., Domínguez, J., Sanchis, J., & Primo, J. (2008). Evaluation of Traps and Lures for Mass Trapping of Mediterranean Fruit Fly in Citrus Groves. Journal of Economic Entomology, 101(1), 126–131. doi:10.1603/0022-0493(2008)101[126:EOTALF]2.0.CO;2
100	1	0	0	MCA		Nestel, D., Katsoyannos, B., Nemny-Lavy, E., Mendel, Z. & Papadopoulos, N. (2004) Spatial análisis of Medfly populations in heterogeneous landscapes. Proceedings of the 6th International Symposium on Fruit Flies of Economic Importance (ed. by B. Barnes), pp 35-43. Isteg Scientific Publications, Irene.
101	1	1	1			Niklaus-Ruiz Borge and Basedow.1997.A survey on the occurrence and flight periods of fruit fly species in a fruit growing area in southwest Nicaragua, 1994-95
102	1	1	0			Nyamukondiwa, C., & Terblanche, J. S. (2009). Thermal tolerance in adult Mediterranean and Natal fruit flies (Ceratitis capitata and Ceratitis rosa): Effects of age, gender and feeding status. Journal of Thermal Biology, 34(8), 406–414. doi:10.1016/j.jtherbio.2009.09.002
103	0	0	0			Oliveira Prestes, D. A., Siloto, R. C., Raga, A., Zucchi, R. A., Sato, M. E., & Souza Filho, M. F. (2002). Occurrence of fruit flies in coffee varieties in the state of São Paulo, Brazil. Boletín de sanidad vegetal. Plagas, 28(4), 515–524.
104	1	1	0			Oroño, L. E., Albornoz-Medina, P., Núñez-Campero, S., Van Nieuwenhove, G. A., Bezdjian, L. P., Martin, C. B., Schliserman, P., et al. (2006). Update of host plant list of Anastrepha fraterculus and Ceratitis capitata in Argentina. Proceedings of the 7th International Symposium on Fruit Flies of Economic Importance (pp. 10–15).
105	1	1	1			Oukil, S., Bues, R., Causse, R., & Toubon, J. F. (1997). Etude de la variabilite genetique chez 6 populations de Ceratitis capitata dans differentes zones geographiques du bassin Mediterraneen. Bulletin OILB/SROP, 20(8).
106	1	1	0			Ovruski, S., Schliserman, P., & Aluja, M. (2003). Native and Introduced Host Plants of Anastrepha fraterculus and Ceratitis capitata (Diptera: Tephritidae) in Northwestern Argentina. Journal of Economic Entomology, 96(4), 1108–1118. doi:10.1603/0022-0493-96.4.1108
107	1	0	0			Ovruski S.M., Schliserman P., & Aluja M. (2004). Indigenous parasitoids (Hymenoptera) attacking Anastrepha fraterculus and Ceratitis capitata (Diptera: Tephritidae) in native and exotic host plants in Northwestern Argentina. Biological Control, 29(1), 43–57. doi:10.1016/S1049-9644(03)00127-0
108	1	1	0			Ovruski, S. M., Schliserman, P., Oroño, L. E., Nuñéz-Campero, S. R., Albornoz-Medina, P., Bezdjian, L. P., & Van Nieuwenhove, G. A. (2008). Natural Ocurrence of Hymenopterous Parasitoids Associated with Anastrepha fraterculus (Diptera: Tephritidae) in Myrtaceae Species in Entre Rios, Northeastern Argentina. Florida Entomologist, 91(2), 220–227. doi:10.1653/0015-4040(2008)91[220:NOOHPA]2.0.CO;2
109	1	1	0			Ovruski, S. M., Schliserman, P., Van Nieuwenhove, G. A., Bezdjian, L. P., Núñez-Campero, S., & Albornoz-Medina, P. (2010). Occurrence of Ceratitis capitata and Anastrepha fraterculus (Diptera: Tephritidae) on Cultivated, Exotic Fruit Species in the Highland Valleys of Tucuman in Northwest Argentina. Florida Entomologist, 93(2), 277–282. doi:10.1653/024.093.0219
110	1	0	0			Paini, D. R., Worner, S. P., Cook, D. C., De Barro, P. J., & Thomas, M. B. (2010). Threat of invasive pests from within national borders. Nat Commun, 1, 115. doi:10.1038/ncomms1118
111	1	1	1			Papadopoulos, N. T., Katsoyannos, B. I., & Carey, J. R. (2002). Demographic Parameters of the Mediterranean Fruit Fly (Diptera: Tephritidae) Reared in Apples. Annals of the Entomological Society of America, 95, 564–569. doi:10.1603/0013-8746(2002)095[0564:DPOTMF]2.0.CO;2
112	1	1	1			Papadopoulos, N. T., Katsoyannos, B. I., Carey, J. R., & Kouloussis, N. A. (2001). Seasonal and Annual Occurrence of the Mediterranean Fruit Fly (Diptera: Tephritidae) in Northern Greece. Annals of the Entomological Society of America, 94, 41–50. doi:10.1603/0013-8746(2001)094[0041:SAAOOT]2.0.CO;2
113	1	1	1			Papadopoulos, Nikos T., Katsoyannos, B. I., Kouloussis, N. A., Hendrichs, J., Carey, J. R., & Heath, R. R. (2001). Early Detection and Population Monitoring of Ceratitis capitata (Diptera: Tephritidae) in a Mixed-Fruit Orchard in Northern Greece. Journal of Economic Entomology, 94(4), 971–978.
114	1	1	1		the same data as in above paper, skipped doubling info in the database	Papadopoulos, Nikos T., Katsoyannos, B. I., & Nestle, D. (2003). Spatial Autocorrelation Analysis of a Ceratitis capitata (Diptera: Tephritidae) Adult Population in a Mixed Deciduous Fruit Orchard in Northern Greece. Environmental Entomology, 32(2), 319–326. doi:10.1603/0046-225X-32.2.319
115	1	0	0	MCA		Papadopoulos, N.T. & Katsoyannos, B.I. (2004) Development of Ceratitis capitata (Diptera: Tephritidae) in three apple varieties in the laboratory. Proceedings of the 6th International Symposium on Fruit Flies of Economic Importance (ed. by B. Barnes), pp 19-22. Isteg Scientific Publications, Irene.
116	1	1	1			Peck, S. L., & McQuate, G. T. (2000). Field Tests of Environmentally Friendly Malathion Replacements to Suppress Wild Mediterranean Fruit Fly (Diptera: Tephritidae) Populations. Journal of Economic Entomology, 93(2), 280–289. doi:10.1603/0022-0493-93.2.280
117	1	0	0			Peñarrubia-María, E., Avilla, J., & Escudero-Colomar, L. A. (2012). Survival of Wild Adults of Ceratitis capitata (Wiedemann) under Natural Winter Conditions in North East Spain. Psyche: A Journal of Entomology, 2012, 1–6. doi:10.1155/2012/497087
118	1	1	0	MCA		Pires, A.O., Selivon, D. & Perondini, A.L.P. (2004) Variation in symmetrical patterns of development in Anastrepha grandis and Ceratitis capitata (Diptera: Tephritidae). Proceedings of the 6th International Symposium on Fruit Flies of Economic Importance (ed. by B. Barnes), pp 259-263. Isteg Scientific Publications, Irene.
119	1	1	1			Puche, H., Midgarden, D. G., Ovalle, O., Kendra, P. E., Epsky, N. D., Rendon, P., & Heath, R. R. (2005). EFFECT OF ELEVATION AND HOST AVAILABILITY ON DISTRIBUTION OF STERILE AND WILD MEDITERRANEAN FRUIT FLIES (DIPTERA: TEPHRITIDAE). Florida Entomologist, 88(1), 83–90. doi:10.1653/0015-4040(2005)088[0083:EOEAHA]2.0.CO;2
120	1	1	1			Radonjic´, S., & Garcia-Marí, F. (2006). The Mediterranean fruit fly Ceratitis capitata Wiedemann (Diptera, Tephritidae), a new pest in Montenegro. (Vol. 29, pp. 217–224). Presented at the International Conference on Integrated Control in Citrus Fruit Crops. Proceedings of the meeting of the International Organization for Biological and Integrated Control of Noxious Animals and Plants, West Palea…
121	1	0	0	MCA		Reboulakis, C., Mavrikakis, P.G., Economopoulos, A.P. & Ragoussis, N. (2004) Orange fruit volatiles are Medfly species- and male-specific attractants. In Barnes, B. (Ed.) Proceedings of the 6th International Symposium on Fruit Flies of Economic Importance (ed. by B. Barnes), pp 291-294. Isteg Scientific Publications, Irene.
122	1	0	0			Rengifo, J. A., Garcia, J. G., Rodriguez, J. F., & Wyckhuys, K. A. G. (2011). Host Status of Purple Passionfruit for the Mediterranean Fruit Fly (Diptera: Tephritidae). Florida Entomologist, 94(1), 91–96. doi:10.1653/024.094.0112
123	1	0	0	MCA		Reyes, A. & Ochando, M.D. (1998) Use of molecular markers for detecting the geographical origin of Ceratitis capitata (Diptera: Tephritidae) populations. Annals of the Entomological Society of America 91, 222-227.
124	1	1	1			RIGAMONTI, I. E., & Rigamonti, I. E. (2004). Contributions to the knowledge of Ceratitis capitata Wied. (Diptera, Tephritidae) in Northern Italy. I. Observations on the biology. Retrieved from http://hdl.handle.net/2434/27431
125	1	1	1			Rivnay 1941
126	0	0	0			Rivnay, E. (1950). The Mediterranean Fruit Fly in Israel. Bulletin of Entomological Research, 41(02), 321–341. doi:10.1017/S0007485300027656
127	1	0	0	MCA		Ros, J.P., Escobar, I., Garcia Tapia, F.J. & Aranda, G. (2000) Pilot experiment to control Medfly, Ceratitis capitata (Wied.) (Diptera: Tephritidae) using mass trapping technique in a cherimoyer (Annona cherimola Miller) orchard. Area-Wide Control of Fruit Flies and Other Insect Pests (ed. by K.H. Tan), pp 639-643. Penerbit Universiti Sains Malaysia, Pula Pinang.
128	1	1	1			Ros, J. P., Gomila, J., Reurer, M., Pons, P., Castillo, E., & Barnes, B. N. (2004). The use of mass-trapping against Medfly (Ceratitis capitata (Wied.)) in a sustainable agriculture system on Minorca Island, Spain. (pp. 361–364). Presented at the Proceedings of the 6th International Symposium on fruit flies of economic importance, Stellenbosch, South Africa, 6-10 May 2002., Isteg Scientific Publi…
129	1	1	1			Schliserman, P., & Ovruski, S. M. (2004). Incidencia de moscas de la fruta de importancia económica sobre Citrus aurantium (Rutaceae) en Tucumán, Argentina. Rev. Manejo Integr. Plagas y Agroecología (Costa Rica), 72, 52–61.
130	1	1	1			Sciarretta, A., & Trematerra, P. (2011). Spatio‐temporal distribution of Ceratitis capitata population in a heterogeneous landscape in Central Italy. Journal of Applied Entomology, 135(4), 241–251. doi:10.1111/j.1439-0418.2010.01515.x
131	1	1	1			Segura, D. F, Vera, M. T., Cladera, J. L., & Barnes, B. N. (2004). Host utilization by the Mediterranean fruit fly, Ceratitis capitata (Diptera: Tephritidae). (pp. 83–90). Presented at the Proceedings of the 6th International Symposium on fruit flies of economic importance, Stellenbosch, South Africa, 6-10 May 2002., Isteg Scientific Publications. Retrieved from http://www.cabdirect.org/abstracts…
132	1	1	1			Segura, Diego F, M Teresa Vera, and Jorge L Cladera. 2004. “Fluctuación Estacional En La Infestación De Diversos Hospedadores Por La Mosca Del Mediterráneo, Ceratitis Capitata (Diptera: Tephritidae), En La Provincia De Buenos Aires.” Ecología Austral 14 (1) (June): 3–17.
133	1	1	1			Segura, Diego F., Vera, M. T., Cagnotti, C. L., Vaccaro, N., De Coll, O., Ovruski, S. M., & Cladera, J. L. (2006). Relative Abundance of Ceratitis capitata and Anastrepha fraterculus (Diptera: Tephritidae) in Diverse Host Species and Localities of Argentina. Annals of the Entomological Society of America, 99(1), 70–83. doi:10.1603/0013-8746(2006)099[0070:RAOCCA]2.0.CO;2
134	1	0	0			Shoukry, A., & Hafez, M. (1979). Studies on the biology of the Mediterranean fruit fly&lt;i&gt;Ceratitis capitata&lt;/i&gt; Entomologia Experimentalis et Applicata, 26(1), 33–39. doi:10.1007/BF02996633
135	1	1	0			Silva, J. G., Meixner, M. D., Mcpheron, B. A., Steck, G. J., & Sheppard, W. S. (2003). Recent Mediterranean Fruit Fly (Diptera: Tephritidae) Infestations in Florida—A Genetic Perspective. Journal of Economic Entomology, 96(6), 1711–1718. doi:10.1603/0022-0493-96.6.1711
136	1	1	0			Souza, Silvana A. S, André L. S Resende, Pedro C Strikis, Janaína R Costa, Marta S. F Ricci, and Elen L Aguiar-Menezes. 2005. “Natural Infestation by Frugivorous Flies (Diptera: Tephritoidea) in Shaded and Unshaded Arabic Coffee Under Organic Management in Valença, RJ, Brazil.” Neotropical Entomology 34 (4) (August): 639–648. doi:10.1590/S1519-566X2005000400015.
137	1	1	0		absence	Souza-Filho, Z. A., De Araujo, E. L., Guimarães, J. A., & Silva, J. G. (2007). Endemic Parasitoids Associated with Anastrepha spp. (Diptera: Tephritidae) Infesting Guava (Psidium Guajava) in Southern Bahia, Brazil. Florida Entomologist, 90(4), 783–785. doi:10.1653/0015-4040(2007)90[783:EPAWAS]2.0.CO;2
138	1	1	1			Souza-Filho, M. F., A. Raga, J. A. Azevedo-Filho, P. C. Strikis, J. A. Guimarães, and R. A. Zucchi. 2009. “Diversity and Seasonality of Fruit Flies (Diptera: Tephritidae and Lonchaeidae) and Their Parasitoids (Hymenoptera: Braconidae and Figitidae) in Orchards of Guava, Loquat and Peach.” Brazilian Journal of Biology 69 (1) (February): 31–40. doi:10.1590/S1519-69842009000100004.
139	1	0	0			Staub, C. G., De Lima, F., & Majer, J. D. (2008). Determination of host status of citrus fruits against the Mediterranean fruit fly, Ceratitis capitata (Wiedemann) (Diptera: Tephritidae). Australian Journal of Entomology, 47(3), 184–187. doi:10.1111/j.1440-6055.2008.00646.x
140	1	1	1			Suckling, D. M., Jang, E. B., Holder, P., Carvalho, L., & Stephens, A. E. (2008). Evaluation of lure dispensers for fruit fly surveillance in New Zealand. Pest Management Science, 64(8), 848–856. doi:10.1002/ps.1578
141	1	0	0			Sugayama, R. L., Branco, E. S., Malavasi, A., Kovaleski, A., & Nora, I. (1997). Oviposition behavior of Anastrepha fraterculus in apple and diel pattern of activities in an apple orchard in Brazil. Entomologia Experimentalis et Applicata, 83(3), 239–245. doi:10.1023/A:1002913018833
142	1	0	0			Terblanche, J. S., Nyamukondiwa, C., & Kleynhans, E. (2010). Thermal variability alters climatic stress resistance and plastic responses in a globally invasive pest, the Mediterranean fruit fly (Ceratitis capitata). Entomologia Experimentalis et Applicata, 137(3), 304–315. doi:10.1111/j.1570-7458.2010.01067.x
143	1	0	0			Tormos, J., Beitia, F., Alonso, M., Asís, J. D., & Gayubo, S. F. (2010). Assessment of Ceratitis capitata (Diptera, Tephritidae) pupae killed by heat or cold as hosts for rearing Spalangia cameroni (Hymenoptera: Pteromalidae). Annals of Applied Biology, 156(2), 179–185. doi:10.1111/j.1744-7348.2009.00377.x
144	1	1	1			Tóth, M., Tabilio, R., & Franco, F. di. (2009). Developing semiochemical tools for monitoring, mass trapping and integrated control of potential pests of citrus and Mediterranean fruit crops. Protezione delle Colture, (3), 34–39.
145	1	1	0			Uchôa, M. A., & Nicácio, J. (2010). New Records of Neotropical Fruit Flies (Tephritidae), Lance Flies (Lonchaeidae) (Diptera: Tephritoidea), and Their Host Plants in the South Pantanal and Adjacent Areas, Brazil. Annals of the Entomological Society of America, 103(5), 723–733. doi:10.1603/AN09179
146	1	1	0			UCHÔA-FERNANDES, M. A., OLIVEIRA, I. D., MOLINA, R. M. S., & ZUCCHI, R. A. (2002). Species Diversity of Frugivorous Flies (Diptera: Tephritoidea) from Hosts in the Cerrado of the State of Mato Grosso do Sul, Brazil. Neotropical Entomology, 31(4), 515–524. doi:10.1590/S1519-566X2002000400002
147	1	1	1			Vadora, M. L., Salaverrey, L., & Rodriguez, L. (1993). Prediction of Ceratitis capitata captures based on climatic factors. Springer Verlag.
148	1	1	1			Vargas, R. I., & Nishida, T. (1989). Spatial Distribution of Mediterranean Fruit Fly (Diptera: Tephritidae) throughout West Oahu: Development of Eradication Strategies. Retrieved from http://scholarspace.manoa.hawaii.edu/handle/10125/11243
149	1	1	1			Vargas, R. I., Piñero, J. C., Mau, R. F. L., Jang, E. B., Klungness, L. M., McInnis, D. O., Harris, E. B., et al. (2010). Area-Wide Suppression of the Mediterranean Fruit Fly, Ceratitis capitata, and the Oriental Fruit Fly, Bactrocera dorsalis, in Kamuela, Hawaii. Journal of Insect Science, 10(135), 1–17. doi:10.1673/031.010.13501
150	1	0	0			Vayssières, J.-F., Korie, S., & Ayegnon, D. (2009). Correlation of fruit fly (Diptera Tephritidae) infestation of major mango cultivars in Borgou (Benin) with abiotic and biotic factors and assessment of damage. Crop Protection, 28(6), 477–488. doi:10.1016/j.cropro.2009.01.010
151	1	0	0			Vera, M. T., Rodriguez, R., Segura, D. F., Cladera, J. L., & Sutherst, R. W. (2002). Potential Geographical Distribution of the Mediterranean Fruit Fly, Ceratitis capitata (Diptera: Tephritidae), with Emphasis on Argentina and Australia. Environmental Entomology, 31, 1009–1022. doi:10.1603/0046-225X-31.6.1009
152	1	0	0			VILLABLANCA, F. X., RODERICK, G. K., & PALUMBI, S. R. (1998). Invasion genetics of the Mediterranean fruit fly: variation in multiple nuclear introns. Molecular Ecology, 7(5), 547–560. doi:10.1046/j.1365-294x.1998.00351.x
153	1	0	0			Weldon, C. W., Terblanche, J. S., & Chown, S. L. (2011). Time-course for attainment and reversal of acclimation to constant temperature in two Ceratitis species. Journal of Thermal Biology, 36(8), 479–485. doi:10.1016/j.jtherbio.2011.08.005
154	0	0	0			WORNER, S. P. (1988). Ecoclimatic Assessment of Potential Establishment of Exotic Pests. Journal of Economic Entomology, 81(4), 973–983.
155	1	0	0			Worner, S. P., & Gevrey, M. (2006). Modelling global insect pest species assemblages to determine risk of invasion. Journal of Applied Ecology, 43(5), 858–867. doi:10.1111/j.1365-2664.2006.01202.x
156	1	0	0	MCA		Yuval, B., Kaspi, R., Shloush, S. & Warburg, M.S. (1998) Nutritional reserves regulate male participation in Mediterranean fruit fly leks. Ecological Entomology, 23, 211-215.
157	1	1	1			Zaborowski, A., & Tison, G. (2008). Evaluation d’une nouvelle methode de lutte contre la mouche des fruits Ceratitis capitata Wied. sur agrumes en Corse: la chemosterilisation a base de lufenuron. Syngenta Agro SAS - 1 av des pres - 78286 Guyancourt, France. Association Francaise de Protection des Plantes (AFPP) Association Francaise de Protection des Plantes (AFPP).
158	1	1	1			Zeki, C., Er, H., Özdem, A., & Bozkurt, V. (2008). Distribution and infestation of Mediterranean fruit fly (Ceratitis capitata Wied.)(Diptera: Tephritidae) on pome and stone fruits in Isparta and Burdur provinces (Turkey). Munis Entomology and Zoology, 3, 231–238.
159	1	1	1			Global Biodiversity Information Facility
160	1	1	1			Instituto Nacional de Biodiversidada Costa Rica			http://www.inbio.ac.cr/bims/k02/p05/c029/o0121/f00714/g006328/s018426.htm
161	1	1	1			Museo Nacional de Costa Rica			http://www.museocostarica.go.cr
162	1	1	1			Belgian Biodiversity Platform (BEBIF)			http://projects.bebif.be/fruitfly/index.html
163	1	1	1			Natural History Museum of Denmark			http://zoologi.snm.ku.dk/english/collections/entomology_collections/dokument2/
164	1	1	1			Museum of Central Africa
165	0	0	0			IDENTIFICACIÓN Y CARACTERIZACIÓN DE MOSCAS DE LAS FRUTAS EN LOS DEPARTAMENTOS DEL VALLE DEL CAUCA, TOLIMA Y QUINDÍO

## Sheet: Legend
SOURCE_ID	Source identification number from the SOURCE_ID tab
INITIALS	First author initials
1STAUTHOR	First author last name
YEAR	Year of publication
SOURCE_TYPE	book/journal/collection/online/report/thesis/conference/other
PUBLISHED	published source? Yes/no
MEDFLY_DATA	yes if it contains ceratitis capitata data or no if it doesn't
COUNTRY
ADMINLEVEL1	province
ADMINLEVEL2	county
LOCALITY	locality name
LOC_NOTES	notes about the location
LATLONGSOURCE	paper/pers.comm/GoogleEarth/Wikipedia
LATDEG
LATMIN
LATSEC
LONGDEG
LONGMIN
LONGSEC
LAT
LONG
COORDFROMSOURCE	Yes if coordinates were given in the paper
GOODGUESS	Enter “yes” or “no” from the drop-down menu. A location is entered as a good guess when it is not listed in any of the geo-location sources but ancillary information from the article provides a good guide to locate it with some degree of accuracy (e.g. article states that the site is 4 km north on the road between town x and town y; this can be easily located in Encarta using the ruler tool). A r…
BADGUESS	Enter “yes” or “no” from the drop-down menu. In contrast, a bad guess is entered when the location is not listed in any of the geo-location sources and the ancillary information from the article is more vague (e.g. article states that the site is near town x towards the north but no distance is specified). A rule of thumb is: using the information from the article, if you are confident that the e…
SITENOTES	Note clearly any decisions you made while geo-referencing that will help a third person understand and enable them to repeat the choices you have made.
PRESENCE	P - Present, H - Historical/Eradicated, T - temporary
YEAR
MONTH
DAY
RELATIVE_INTENSITY	Relative intensity (marginal/low/high/peak)
PRESENT	Medfly captured/collected? Yes/no
TEMPREF	Temporal information about Medfly? Yes/no
SAMPLINGTECHNIQUE1
NO2
SAMPLINGTECHNIQUE2
NO2
DEV_STAGE	egg/larvae/pupae/adult
HOST1
HOST2
HOST3
HOST4
HOST5
HOST6
AREATYPE

## Sheet: DropDownchoices
1
2	Marginal	Yes	Journal	Source	Egg	0		GBIF	P
3	Low	No	Book	GoogleEarth	Larvae	1		MCA	H
4	High		Conference	Pers_comm	Pupae				T
5	Peak		Collection	Wikipedia	Adult				A
6	None		Online	Other
			Report
			Thesis
			Other
